# Supplementary material for: Intramolecular OH⋅⋅⋅Fluorine Hydrogen Bonding in Saturated, Acyclic Fluorohydrins: The γ-Fluoropropanol Motif
Source: PubMed Central journal article supplement (PMC4676915; doi:10.1002/chem.201503253), 2015-10-23

# CHEMISTRY

## A **European** Journal

### Supporting Information

#### **Intramolecular OH...Fluorine Hydrogen Bonding in Saturated, Acyclic Fluoroalcohols: The $\gamma$ -Fluoropropanol Motif**

Bruno Linclau,<sup>\*[a]</sup> Florent Peron,<sup>[a]</sup> Elena Bogdan,<sup>[b]</sup> Neil Wells,<sup>[a]</sup> Zhong Wang,<sup>[a]</sup>  
Guillaume Compain,<sup>[a]</sup> Clément Q. Fontenelle,<sup>[a]</sup> Nicolas Galland,<sup>[b]</sup> Jean-Yves Le Questel,<sup>[b]</sup>  
and Jérôme Graton<sup>\*[b]</sup>

chem\_201503253\_sm\_miscellaneous\_information.pdf

---

# SUPPORTING INFORMATION 1

## Computational studies

---

### Table of Contents

|            |                                                                                                                                                                                                                                                    |           |
|------------|----------------------------------------------------------------------------------------------------------------------------------------------------------------------------------------------------------------------------------------------------|-----------|
| <b>1</b>   | <b>Conformational descriptors.....</b>                                                                                                                                                                                                             | <b>4</b>  |
| <b>2</b>   | <b>Conformational analysis .....</b>                                                                                                                                                                                                               | <b>5</b>  |
| 2.1        | <b>Energetic distribution of analyzed compounds .....</b>                                                                                                                                                                                          | <b>5</b>  |
| 2.1.1      | Table S1. Free energy differences ( $\Delta G$ , kJ mol <sup>-1</sup> ) and conformational distribution ( $p_i$ , %) of <i>syn</i> -4-fluoropentan-2-ol ( <i>syn</i> -A) .....                                                                     | 5         |
| 2.1.2      | Table S2. Free energy differences ( $\Delta G$ , kJ mol <sup>-1</sup> ) and conformational distribution ( $p_i$ , %) of <i>anti</i> -4-fluoropentan-2-ol ( <i>anti</i> -A) .....                                                                   | 6         |
| 2.1.3      | Table S3. Free energy differences ( $\Delta G$ , kJ mol <sup>-1</sup> ) and conformational distribution ( $p_i$ , %) of 4-fluorobutan-2-ol (B) .....                                                                                               | 7         |
| 2.1.4      | Table S4. Free energy differences ( $\Delta G$ , kJ mol <sup>-1</sup> ) and conformational distribution ( $p_i$ , %) of 2,2-dimethyl-3-fluoropropan-1-ol (C) .....                                                                                 | 8         |
| 2.1.5      | Table S5. Free energy differences ( $\Delta G$ , kJ mol <sup>-1</sup> ) and conformational distribution ( $p_i$ , %) of 3-fluoropropan-1-ol (D) .....                                                                                              | 9         |
| 2.1.6      | Table S6. Free energy differences ( $\Delta G$ , kJ mol <sup>-1</sup> ) and conformational distribution ( $p_i$ , %) of 4,4-difluoropentan-2-ol (E) .....                                                                                          | 10        |
| 2.1.7      | Table S7. Free energy differences ( $\Delta G$ , kJ mol <sup>-1</sup> ) and conformational distribution ( $p_i$ , %) of 4,4-difluorobutan-2-ol (F) .....                                                                                           | 11        |
| 2.1.8      | Table S8. Free energy differences ( $\Delta G$ , kJ mol <sup>-1</sup> ) and conformational distribution ( $p_i$ , %) of 3,3-difluoropropan-1-ol (G) .....                                                                                          | 12        |
| 2.1.9      | Table S9. Free energy differences ( $\Delta G$ , kJ mol <sup>-1</sup> ) and conformational distribution ( $p_i$ , %) of 4,4,4-trifluorobutan-2-ol (H) .....                                                                                        | 13        |
| 2.1.10     | Table S10. Free energy differences ( $\Delta G$ , kJ mol <sup>-1</sup> ) and conformational distribution ( $p_i$ , %) of 3,3,3-trifluoropropan-1-ol (I) .....                                                                                      | 13        |
| 2.1.11     | Table S11. Free energy differences ( $\Delta G$ , kJ mol <sup>-1</sup> ) and conformational distribution ( $p_i$ , %) of <i>syn</i> -4-methoxypentan-2-ol ( <i>syn</i> -J) and <i>anti</i> -4-methoxypentan-2-ol ( <i>anti</i> -J) .....           | 14        |
| 2.1.12     | Table S12. Free energy differences ( $\Delta G$ , kJ mol <sup>-1</sup> ) and conformational distribution ( $p_i$ , %) of <i>syn</i> -2-fluoro-4-methoxypentane ( <i>syn</i> -K) and <i>anti</i> -2-fluoro-4-methoxypentane ( <i>anti</i> -K) ..... | 14        |
| <b>2.2</b> | <b>Depiction of the optimized structures at the IEFPCM-MPWB1K/6-31+G(d,p) level of theory .....</b>                                                                                                                                                | <b>15</b> |

|        |                                                                                                                                                                                                                                                                                                                                                                                                                                                                                                                                         |           |
|--------|-----------------------------------------------------------------------------------------------------------------------------------------------------------------------------------------------------------------------------------------------------------------------------------------------------------------------------------------------------------------------------------------------------------------------------------------------------------------------------------------------------------------------------------------|-----------|
| 2.2.1  | <i>syn</i> -4-fluoropentan-2-ol ( <i>syn</i> -A) .....                                                                                                                                                                                                                                                                                                                                                                                                                                                                                  | 15        |
| 2.2.2  | <i>anti</i> -4-fluoropentan-2-ol ( <i>anti</i> -A) .....                                                                                                                                                                                                                                                                                                                                                                                                                                                                                | 16        |
| 2.2.3  | 4-fluorobutan-2-ol (B) .....                                                                                                                                                                                                                                                                                                                                                                                                                                                                                                            | 17        |
| 2.2.4  | 2,2-dimethyl-3-fluoropropan-1-ol (C) .....                                                                                                                                                                                                                                                                                                                                                                                                                                                                                              | 18        |
| 2.2.5  | 3-fluoropropan-1-ol (D) .....                                                                                                                                                                                                                                                                                                                                                                                                                                                                                                           | 18        |
| 2.2.6  | 4,4-difluoropentan-2-ol (E) .....                                                                                                                                                                                                                                                                                                                                                                                                                                                                                                       | 19        |
| 2.2.7  | 3,3-difluorobutan-2-ol (F) .....                                                                                                                                                                                                                                                                                                                                                                                                                                                                                                        | 19        |
| 2.2.8  | 3,3-difluoropropan-1-ol (G).....                                                                                                                                                                                                                                                                                                                                                                                                                                                                                                        | 20        |
| 2.2.9  | 4,4,4-trifluorobutan-2-ol (H).....                                                                                                                                                                                                                                                                                                                                                                                                                                                                                                      | 20        |
| 2.2.10 | 3,3,3-trifluoropropan-1-ol (I).....                                                                                                                                                                                                                                                                                                                                                                                                                                                                                                     | 20        |
| 2.2.11 | <i>syn</i> -4-methoxypentan-2-ol ( <i>syn</i> -J).....                                                                                                                                                                                                                                                                                                                                                                                                                                                                                  | 21        |
| 2.2.12 | <i>anti</i> -4-methoxypentan-2-ol ( <i>anti</i> -J).....                                                                                                                                                                                                                                                                                                                                                                                                                                                                                | 21        |
| 2.2.13 | <i>syn</i> -2-fluoro-4-methoxypentane ( <i>syn</i> -K).....                                                                                                                                                                                                                                                                                                                                                                                                                                                                             | 21        |
| 2.2.14 | <i>anti</i> -2-fluoro-4-methoxypentane ( <i>anti</i> -K).....                                                                                                                                                                                                                                                                                                                                                                                                                                                                           | 22        |
| 2.3    | <b>Table S13. Characteristic properties of the OH•••F IMHB encountered in the relevant conformers of compounds A-I. AIM electron density (<math>\rho</math>, e bohr<sup>-3</sup>) at the bond critical points, energy of H-bond (<math>E_{\text{HB}}</math>, kJ·mol<sup>-1</sup>), NCI attractive and repulsive contributions of the OH•••F interaction (<math>\text{sign}(\lambda_2)\rho</math>, e bohr<sup>-3</sup>) and NBO interaction energy (<math>E^{(2)}_{\text{n} \rightarrow \sigma^*}</math>, kJ mol<sup>-1</sup>) .....</b> | <b>23</b> |
| 3      | <b>NCI (Non-Covalent Interaction) analysis .....</b>                                                                                                                                                                                                                                                                                                                                                                                                                                                                                    | <b>24</b> |
| 3.1    | <b>Table S14. NCI isosurfaces and electron densities features, <math>\text{sign}(\lambda_2)\rho</math> and reduced density gradient (RDG) on IEFPCM-MP2/6-311++G(2d,p) wavefunctions in CCl<sub>4</sub> for the main conformers of compound <i>syn</i>-A. ....</b>                                                                                                                                                                                                                                                                      | <b>24</b> |
| 3.2    | <b>Table S15. NCI isosurfaces and electron densities features, <math>\text{sign}(\lambda_2)\rho</math> and reduced density gradient (RDG) on IEFPCM-MP2/6-311++G(2d,p) wavefunctions in CCl<sub>4</sub> for the main conformers of compound <i>anti</i>-A. ....</b>                                                                                                                                                                                                                                                                     | <b>25</b> |
| 3.3    | <b>Table S16. NCI isosurfaces and electron densities features, <math>\text{sign}(\lambda_2)\rho</math> and reduced density gradient (RDG) on IEFPCM-MP2/6-311++G(2d,p) wavefunctions in CCl<sub>4</sub> for the main conformers of compound B. ....</b>                                                                                                                                                                                                                                                                                 | <b>26</b> |
| 3.4    | <b>Table S17. NCI isosurfaces and electron densities features, <math>\text{sign}(\lambda_2)\rho</math> and reduced density gradient (RDG) on IEFPCM-MP2/6-311++G(2d,p) wavefunctions in CCl<sub>4</sub> for the main conformers of compound C.....</b>                                                                                                                                                                                                                                                                                  | <b>27</b> |
| 3.5    | <b>Table S18. NCI isosurfaces and electron densities features, <math>\text{sign}(\lambda_2)\rho</math> and reduced density gradient (RDG) on IEFPCM-MP2/6-311++G(2d,p) wavefunctions in CCl<sub>4</sub> for the main conformers of compound D. ....</b>                                                                                                                                                                                                                                                                                 | <b>28</b> |
| 3.6    | <b>Table S19. NCI isosurfaces and electron densities features, <math>\text{sign}(\lambda_2)\rho</math> and reduced density gradient (RDG) on IEFPCM-MP2/6-311++G(2d,p) wavefunctions in CCl<sub>4</sub> for the main conformers of compound E.....</b>                                                                                                                                                                                                                                                                                  | <b>28</b> |
| 3.7    | <b>Table S20. NCI isosurfaces and electron densities features, <math>\text{sign}(\lambda_2)\rho</math> and reduced density gradient (RDG) on IEFPCM-MP2/6-311++G(2d,p) wavefunctions in CCl<sub>4</sub> for the main conformers of compound F.....</b>                                                                                                                                                                                                                                                                                  | <b>29</b> |
| 3.8    | <b>Table S21. NCI isosurfaces and electron densities features, <math>\text{sign}(\lambda_2)\rho</math> and reduced density gradient (RDG) on IEFPCM-MP2/6-311++G(2d,p) wavefunctions in CCl<sub>4</sub> for the main conformers of compound G. ....</b>                                                                                                                                                                                                                                                                                 | <b>30</b> |
| 3.9    | <b>Table S22. NCI isosurfaces and electron densities features, <math>\text{sign}(\lambda_2)\rho</math> and reduced density gradient (RDG) on IEFPCM-MP2/6-311++G(2d,p) wavefunctions in CCl<sub>4</sub> for the main conformers of compound H.....</b>                                                                                                                                                                                                                                                                                  | <b>30</b> |
| 3.10   | <b>Table S23. NCI isosurfaces and electron densities features, <math>\text{sign}(\lambda_2)\rho</math> and reduced density gradient (RDG) on IEFPCM-MP2/6-311++G(2d,p) wavefunctions in CCl<sub>4</sub> for the main conformers of compound I.....</b>                                                                                                                                                                                                                                                                                  | <b>31</b> |

---

|                                                            |           |
|------------------------------------------------------------|-----------|
| <b>4 Table S24: Calculated NMR coupling constants.....</b> | <b>32</b> |
|------------------------------------------------------------|-----------|



## 1 Conformational descriptors

For ease of comparison between the different compounds, the following dihedral angles  $\chi$ ,  $\varphi$ ,  $\psi$  are defined as shown in below. For each conformation, these dihedrals are indicated in this order, with the latter between brackets.

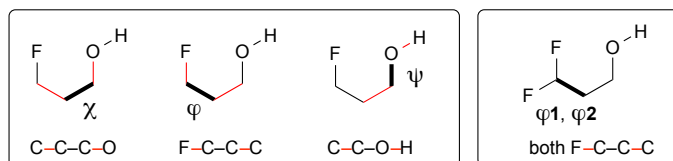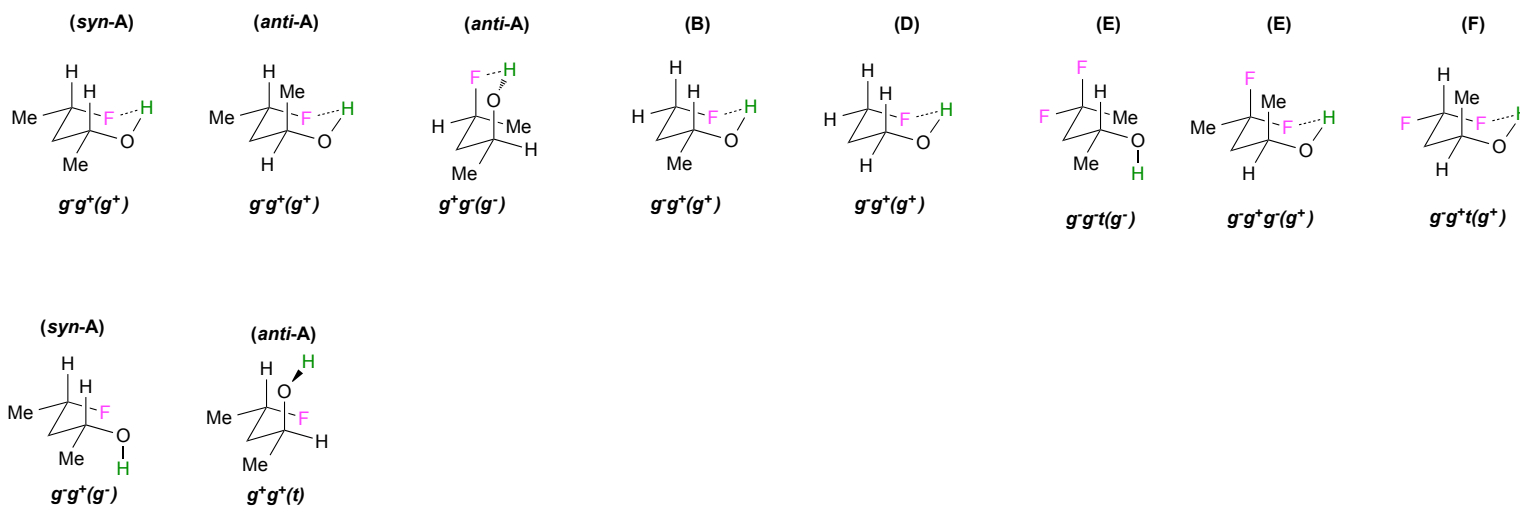

For 4,4-difluoropentanol (E), 4,4-difluorobutanol (F), and 3,3-difluoropropanol (G), the two  $\varphi$ -dihedrals need to be provided (no distinction is necessary). In many cases non-relevant C-O rotamers are grouped together. For the trifluoroderivatives, only two dihedrals are required.

## 2 Conformational analysis

### 2.1 Energetic distribution of analyzed compounds

**2.1.1 Table S1. Free energy differences ( $\Delta G$ , kJ mol<sup>-1</sup>) and conformational distribution ( $p_i$ , %) of *syn*-4-fluoropentan-2-ol (*syn*-A) in various solvents (CCl<sub>4</sub>, CHCl<sub>3</sub> and CH<sub>2</sub>Cl<sub>2</sub>) at various temperatures (298K and 223K) calculated at the IEFPCM-MP2/6-311++G(2d,p)//MPWB1K/6-31+G(d,p) level of theory.**

|                 |               | CCl <sub>4</sub> | 298K  | CHCl <sub>3</sub> | 298K  | CH <sub>2</sub> Cl <sub>2</sub> | 298K  | CHCl <sub>3</sub> | 223K  | CHCl <sub>3</sub> | 298K  |
|-----------------|---------------|------------------|-------|-------------------|-------|---------------------------------|-------|-------------------|-------|-------------------|-------|
|                 |               | $\Delta G$       | $p_i$ | $\Delta G$        | $p_i$ | $\Delta G$                      | $p_i$ | $\Delta G$        | $p_i$ | $\mu$ (D)         |       |
| <i>syn</i> -A1  | $g^-g^+(g^+)$ | 0.0              | 44.7% | 0.0               | 38.9% | 0.0                             | 36.0% | 0.0               | 59.0% | 4.002             |       |
| <i>syn</i> -A2  | $tg^+(g^+)$   | 3.4              | 11.2% | 2.7               | 12.9% | 2.4                             | 13.7% | 3.4               | 9.7%  | 2.132             |       |
| <i>syn</i> -A3  | $tg^+(t)$     | 3.8              | 9.5%  | 3.2               | 10.6% | 2.9                             | 11.0% | 3.7               | 8.0%  | 1.828             |       |
| <i>syn</i> -A4  | $g^-(g^-)$    | 4.4              | 7.7%  | 3.8               | 8.5%  | 3.5                             | 8.6%  | 4.2               | 6.2%  | 2.339             |       |
| <i>syn</i> -A5  | $g^-(t)$      | 4.4              | 7.6%  | 4.0               | 7.7%  | 3.9                             | 7.6%  | 4.0               | 6.8%  | 4.122             |       |
| <i>syn</i> -A6  | $g^-g^-(t)$   | 6.2              | 3.6%  | 6.3               | 3.1%  | 6.3                             | 2.8%  | 6.6               | 1.7%  | 1.737             |       |
| <i>syn</i> -A7  | $g^-(g^+)$    | 6.2              | 3.6%  | 5.2               | 4.8%  | 4.6                             | 5.6%  | 6.0               | 2.3%  | 2.625             |       |
| <i>syn</i> -A8  | $tg^+(g^-)$   | 6.3              | 3.5%  | 5.3               | 4.6%  | 4.8                             | 5.3%  | 5.8               | 2.6%  | 3.896             |       |
| <i>syn</i> -A9  | $g^+g^+(t)$   | 6.9              | 2.7%  | 7.1               | 2.2%  | 7.2                             | 2.0%  | 7.1               | 1.3%  | 1.923             |       |
| <i>syn</i> -A10 | $g^+g^+(g^-)$ | 7.3              | 2.3%  | 7.2               | 2.2%  | 7.1                             | 2.0%  | 8.0               | 0.8%  | 0.863             |       |
| <i>syn</i> -A11 | $g^-g^-(g^-)$ | 8.7              | 1.3%  | 8.3               | 1.4%  | 8.1                             | 1.4%  | 8.8               | 0.5%  | 3.427             |       |
| <i>syn</i> -A12 | $g^+g^+(g^+)$ | 10.1             | 0.8%  | 9.4               | 0.9%  | 9.1                             | 0.9%  | 9.2               | 0.4%  | 3.498             |       |
| <i>syn</i> -A13 | $g^-g^+(t)$   | 10.8             | 0.6%  | 8.4               | 1.3%  | 7.1                             | 2.1%  | 9.3               | 0.4%  | 4.195             |       |
| <i>syn</i> -A14 | $g^+(g^+)$    | 11.3             | 0.5%  | 10.8              | 0.5%  | 10.6                            | 0.5%  | 10.8              | 0.2%  | 1.932             |       |
| <i>syn</i> -A15 | $tg^-(g^-)$   | 11.6             | 0.4%  | 10.9              | 0.5%  | 10.6                            | 0.5%  | 10.9              | 0.2%  | 1.242             |       |
|                 |               |                  |       |                   |       |                                 |       |                   |       | $\bar{\mu}$ (D)   | 3.109 |

**2.1.2 Table S2. Free energy differences ( $\Delta G$ , kJ mol<sup>-1</sup>) and conformational distribution ( $p_i$ , %) of *anti*-4-fluoropentan-2-ol (*anti*-A) in various solvents (CCl<sub>4</sub>, CHCl<sub>3</sub> and CH<sub>2</sub>Cl<sub>2</sub>) at various temperatures (298K and 223K) calculated at the IEFPCM-MP2/6-311++G(2d,p)//MPWB1K/6-31+G(d,p) level of theory.**

|                  |               | CCl <sub>4</sub> | 298K  | CHCl <sub>3</sub> | 298K  | CH <sub>2</sub> Cl <sub>2</sub> | 298K  | CHCl <sub>3</sub> | 223K  | CHCl <sub>3</sub> | 298K  |
|------------------|---------------|------------------|-------|-------------------|-------|---------------------------------|-------|-------------------|-------|-------------------|-------|
|                  |               | $\Delta G$       | $p_i$ | $\Delta G$        | $p_i$ | $\Delta G$                      | $p_i$ | $\Delta G$        | $p_i$ | $\mu$ (D)         |       |
| <i>anti</i> -A1  | $g^-g^-(t)$   | 0.0              | 49.0% | 0.0               | 45.2% | 0.0                             | 42.4% | 0.0               | 60.7% | 1.938             |       |
| <i>anti</i> -A2  | $g^-g^-(g^-)$ | 3.2              | 13.3% | 2.5               | 16.2% | 2.1                             | 18.2% | 2.5               | 15.7% | 3.840             |       |
| <i>anti</i> -A3  | $g^-g^-(g^+)$ | 4.5              | 8.0%  | 4.9               | 6.2%  | 5.2                             | 5.2%  | 4.5               | 5.3%  | 2.237             |       |
| <i>anti</i> -A4  | $g^-g^+(g^+)$ | 5.0              | 6.4%  | 5.1               | 5.8%  | 5.1                             | 5.5%  | 4.8               | 4.6%  | 4.022             |       |
| <i>anti</i> -A5  | $tg^-(t)$     | 5.9              | 4.6%  | 5.6               | 4.7%  | 5.4                             | 4.8%  | 5.9               | 2.5%  | 1.636             |       |
| <i>anti</i> -A6  | $tt(g^+)$     | 6.8              | 3.2%  | 5.9               | 4.3%  | 5.3                             | 5.0%  | 6.2               | 2.2%  | 2.166             |       |
| <i>anti</i> -A7  | $g^+g^-(g^-)$ | 7.0              | 2.9%  | 7.1               | 2.6%  | 7.1                             | 2.4%  | 6.4               | 2.0%  | 3.945             |       |
| <i>anti</i> -A8  | $g^-t(t)$     | 7.2              | 2.7%  | 7.2               | 2.5%  | 7.2                             | 2.3%  | 7.2               | 1.3%  | 3.706             |       |
| <i>anti</i> -A9  | $tt(t)$       | 7.9              | 2.0%  | 6.7               | 3.0%  | 6.1                             | 3.6%  | 6.9               | 1.5%  | 4.215             |       |
| <i>anti</i> -A10 | $tg^-(g^+)$   | 8.0              | 1.9%  | 7.0               | 2.7%  | 6.4                             | 3.2%  | 7.2               | 1.2%  | 3.715             |       |
| <i>anti</i> -A11 | $tg^-(g^-)$   | 8.0              | 1.9%  | 7.5               | 2.2%  | 7.3                             | 2.3%  | 7.8               | 0.9%  | 1.398             |       |
| <i>anti</i> -A12 | $tt(g^-)$     | 8.2              | 1.8%  | 7.2               | 2.5%  | 6.6                             | 2.9%  | 7.4               | 1.1%  | 2.335             |       |
| <i>anti</i> -A13 | $g^-t(g^-)$   | 8.3              | 1.7%  | 8.0               | 1.8%  | 7.8                             | 1.8%  | 8.1               | 0.8%  | 2.308             |       |
| <i>anti</i> -A14 | $g^+g^-(g^+)$ | 11.8             | 0.4%  | 11.9              | 0.4%  | 11.9                            | 0.4%  | 11.6              | 0.1%  | 3.546             |       |
|                  |               |                  |       |                   |       |                                 |       |                   |       | $\bar{\mu}$ (D)   | 2.604 |

**2.1.3 Table S3. Free energy differences ( $\Delta G$ , kJ mol<sup>-1</sup>) and conformational distribution ( $p_i$ , %) of 4-fluorobutan-2-ol (B) in various solvents (CCl<sub>4</sub>, CHCl<sub>3</sub> and CH<sub>2</sub>Cl<sub>2</sub>) at various temperatures (298K and 223K) calculated at the IEFPCM-MP2/6-311++G(2d,p)//MPWB1K/6-31+G(d,p) level of theory.**

|            |               | CCl <sub>4</sub> | 298K  | CHCl <sub>3</sub> | 298K  | CH <sub>2</sub> Cl <sub>2</sub> | 298K  | CHCl <sub>3</sub> | 223K  | CHCl <sub>3</sub> | 298K  |
|------------|---------------|------------------|-------|-------------------|-------|---------------------------------|-------|-------------------|-------|-------------------|-------|
|            |               | $\Delta G$       | $p_i$ | $\Delta G$        | $p_i$ | $\Delta G$                      | $p_i$ | $\Delta G$        | $p_i$ | $\mu$ (D)         |       |
| <b>B1</b>  | $g^-g^-(t)$   | 0.0              | 25.2% | 0.0               | 22.5% | 0.0                             | 20.7% | 0.0               | 32.7% | 2.126             |       |
| <b>B2</b>  | $g^-g^-(g^+)$ | 1.1              | 16.0% | 1.3               | 13.3% | 1.4                             | 11.8% | 1.7               | 13.0% | 1.570             |       |
| <b>B3</b>  | $g^-g^+(g^+)$ | 2.0              | 11.3% | 2.0               | 9.9%  | 2.0                             | 9.3%  | 1.6               | 13.7% | 3.771             |       |
| <b>B4</b>  | $g^-g^-(g^+)$ | 3.1              | 7.3%  | 2.4               | 8.5%  | 2.0                             | 9.4%  | 2.4               | 9.0%  | 3.813             |       |
| <b>B5</b>  | $g^-t(t)$     | 3.1              | 7.2%  | 2.8               | 7.4%  | 2.6                             | 7.3%  | 2.8               | 7.1%  | 4.089             |       |
| <b>B6</b>  | $tg^+(t)$     | 3.5              | 6.2%  | 2.9               | 7.0%  | 2.6                             | 7.3%  | 3.2               | 5.7%  | 1.986             |       |
| <b>B7</b>  | $tg^+(g^+)$   | 4.2              | 4.6%  | 3.6               | 5.3%  | 3.2                             | 5.6%  | 3.9               | 4.0%  | 1.774             |       |
| <b>B8</b>  | $g^-t(g^+)$   | 5.4              | 2.8%  | 4.4               | 3.9%  | 3.7                             | 4.6%  | 5.2               | 2.0%  | 2.456             |       |
| <b>B9</b>  | $g^-t(g^-)$   | 5.5              | 2.7%  | 4.9               | 3.1%  | 4.6                             | 3.2%  | 5.0               | 2.3%  | 2.599             |       |
| <b>B10</b> | $tg^-(g^+)$   | 5.7              | 2.5%  | 4.7               | 3.4%  | 4.1                             | 4.0%  | 5.2               | 2.0%  | 3.502             |       |
| <b>B11</b> | $tg^-(g^-)$   | 5.9              | 2.3%  | 4.9               | 3.1%  | 4.3                             | 3.6%  | 5.3               | 1.9%  | 3.769             |       |
| <b>B12</b> | $tg^-(t)$     | 6.2              | 2.0%  | 5.9               | 2.0%  | 5.8                             | 2.0%  | 6.0               | 1.3%  | 1.636             |       |
| <b>B13</b> | $tg^-(g^-)$   | 6.7              | 1.7%  | 6.1               | 1.9%  | 5.8                             | 2.0%  | 6.5               | 1.0%  | 1.098             |       |
| <b>B14</b> | $g^+t(t)$     | 7.3              | 1.3%  | 6.9               | 1.4%  | 6.7                             | 1.4%  | 7.2               | 0.7%  | 4.174             |       |
| <b>B15</b> | $g^+g^+(t)$   | 7.8              | 1.1%  | 8.0               | 0.9%  | 8.1                             | 0.8%  | 7.6               | 0.5%  | 2.116             |       |
| <b>B16</b> | $g^+g^+(g^-)$ | 8.0              | 1.0%  | 7.9               | 0.9%  | 7.8                             | 0.9%  | 8.2               | 0.4%  | 0.665             |       |
| <b>B17</b> | $tt(t)$       | 8.2              | 0.9%  | 7.1               | 1.3%  | 6.5                             | 1.5%  | 7.4               | 0.6%  | 4.030             |       |
| <b>B18</b> | $g^+g^-(g^-)$ | 8.4              | 0.9%  | 8.4               | 0.8%  | 8.4                             | 0.7%  | 7.7               | 0.5%  | 3.728             |       |
| <b>B19</b> | $tt(g^+)$     | 8.6              | 0.8%  | 7.7               | 1.0%  | 7.1                             | 1.2%  | 7.8               | 0.5%  | 1.727             |       |
| <b>B20</b> | $g^+t(g^+)$   | 8.8              | 0.7%  | 8.2               | 0.8%  | 7.9                             | 0.8%  | 8.2               | 0.4%  | 2.299             |       |
| <b>B21</b> | $tt(g^-)$     | 9.8              | 0.5%  | 8.7               | 0.7%  | 8.1                             | 0.8%  | 8.9               | 0.3%  | 2.432             |       |
| <b>B22</b> | $g^+g^-(g^+)$ | 10.0             | 0.4%  | 10.0              | 0.4%  | 9.9                             | 0.4%  | 10.1              | 0.1%  | 3.413             |       |
| <b>B23</b> | $g^+g^+(g^+)$ | 11.0             | 0.3%  | 10.4              | 0.3%  | 10.0                            | 0.4%  | 9.8               | 0.2%  | 3.495             |       |
| <b>B24</b> | $g^+t(g^-)$   | 12.0             | 0.2%  | 10.9              | 0.3%  | 10.3                            | 0.3%  | 11.3              | 0.1%  | 2.980             |       |
|            |               |                  |       |                   |       |                                 |       |                   |       | $\bar{\mu}$ (D)   | 2.633 |

**2.1.4 Table S4. Free energy differences ( $\Delta G$ ,  $\text{kJ mol}^{-1}$ ) and conformational distribution ( $p_i$ , %) of 2,2-dimethyl-3-fluoropropan-1-ol (C) in various solvents ( $\text{CCl}_4$ ,  $\text{CHCl}_3$  and  $\text{CH}_2\text{Cl}_2$ ) at various temperatures (298K and 223K) calculated at the IEFPCM-MP2/6-311++G(2d,p)//MPWB1K/6-31+G(d,p) level of theory.**

|            |               | $\text{CCl}_4$ | 298K  | $\text{CHCl}_3$ | 298K  | $\text{CH}_2\text{Cl}_2$ | 298K  | $\text{CHCl}_3$ | 223K  | $\text{CHCl}_3$ | 298K  |
|------------|---------------|----------------|-------|-----------------|-------|--------------------------|-------|-----------------|-------|-----------------|-------|
|            |               | $\Delta G$     | $p_i$ | $\Delta G$      | $p_i$ | $\Delta G$               | $p_i$ | $\Delta G$      | $p_i$ | $\mu$ (D)       |       |
| <b>C1</b>  | $g^-g^+(g^+)$ | 0.0            | 30.1% | 0.0             | 26.5% | 0.0                      | 24.3% | 0.2             | 28.1% | 1.598           |       |
| <b>C2</b>  | $g^-g^-(t)$   | 0.2            | 27.2% | 0.1             | 25.0% | 0.1                      | 23.7% | 0.0             | 31.5% | 1.956           |       |
| <b>C3</b>  | $g^-t(t)$     | 2.8            | 9.9%  | 2.4             | 10.0% | 2.2                      | 9.9%  | 2.3             | 9.0%  | 3.826           |       |
| <b>C4</b>  | $g^-g^+(g^+)$ | 3.4            | 7.5%  | 3.1             | 7.6%  | 2.9                      | 7.5%  | 2.5             | 8.2%  | 3.613           |       |
| <b>C5</b>  | $g^-t(g^-)$   | 3.8            | 6.4%  | 3.1             | 7.5%  | 2.8                      | 8.0%  | 2.9             | 6.4%  | 2.455           |       |
| <b>C6</b>  | $tg^+(t)$     | 4.8            | 4.4%  | 4.5             | 4.3%  | 4.4                      | 4.2%  | 4.2             | 3.2%  | 1.638           |       |
| <b>C7</b>  | $g^-g^-(g^-)$ | 5.1            | 3.8%  | 4.0             | 5.3%  | 3.4                      | 6.3%  | 3.4             | 5.0%  | 3.900           |       |
| <b>C8</b>  | $tg^+(g^+)$   | 5.2            | 3.7%  | 4.5             | 4.4%  | 4.1                      | 4.7%  | 4.2             | 3.2%  | 1.543           |       |
| <b>C9</b>  | $g^-t(g^+)$   | 6.1            | 2.5%  | 4.9             | 3.6%  | 4.2                      | 4.4%  | 5.1             | 2.0%  | 2.457           |       |
| <b>C10</b> | $tt(t)$       | 6.4            | 1.1%  | 5.7             | 1.3%  | 5.3                      | 1.4%  | 5.8             | 0.7%  | 3.598           |       |
| <b>C11</b> | $tg^-(g^+)$   | 6.5            | 2.2%  | 5.4             | 3.0%  | 4.8                      | 3.6%  | 5.1             | 2.0%  | 3.706           |       |
| <b>C12</b> | $tt(g^+)$     | 8.8            | 0.9%  | 7.9             | 1.1%  | 7.3                      | 1.3%  | 7.6             | 0.5%  | 1.950           |       |
| <b>C13</b> | $g^-g^+(t)$   | 11.8           | 0.3%  | 9.7             | 0.5%  | 8.5                      | 0.8%  | 9.9             | 0.1%  | 3.944           |       |
|            |               |                |       |                 |       |                          |       |                 |       | $\bar{\mu}$ (D) | 2.385 |

**2.1.5 Table S5. Free energy differences ( $\Delta G$ ,  $\text{kJ mol}^{-1}$ ) and conformational distribution ( $p_i$ , %) of 3-fluoropropan-1-ol (D) in various solvents ( $\text{CCl}_4$ ,  $\text{CHCl}_3$  and  $\text{CH}_2\text{Cl}_2$ ) at various temperatures (298K and 223K) calculated at the IEFPCM-MP2/6-311++G(2d,p)//MPWB1K/6-31+G(d,p) level of theory.**

|            |               | $\text{CCl}_4$ | 298K  | $\text{CHCl}_3$ | 298K  | $\text{CH}_2\text{Cl}_2$ | 298K  | $\text{CHCl}_3$ | 223K  | $\text{CHCl}_3$ | 298K  |
|------------|---------------|----------------|-------|-----------------|-------|--------------------------|-------|-----------------|-------|-----------------|-------|
|            |               | $\Delta G$     | $p_i$ | $\Delta G$      | $p_i$ | $\Delta G$               | $p_i$ | $\Delta G$      | $p_i$ | $\mu$ (D)       |       |
| <b>D1</b>  | $g^-g^-(t)$   | 0.0            | 29.9% | 0.0             | 25.4% | 0.0                      | 22.8% | 0.0             | 33.9% | 1.986           |       |
| <b>D2</b>  | $g^-g^-(g^+)$ | 1.1            | 19.1% | 1.0             | 16.8% | 1.0                      | 15.4% | 1.4             | 15.7% | 1.369           |       |
| <b>D3</b>  | $g^-g^-(g^-)$ | 2.8            | 9.5%  | 1.9             | 11.7% | 1.4                      | 13.2% | 1.9             | 12.4% | 3.881           |       |
| <b>D4</b>  | $g^-g^+(g^+)$ | 2.9            | 9.4%  | 2.7             | 8.4%  | 2.6                      | 7.9%  | 2.3             | 9.6%  | 3.778           |       |
| <b>D5</b>  | $tg^+(t)$     | 3.0            | 8.9%  | 2.4             | 9.7%  | 2.0                      | 10.0% | 2.6             | 8.4%  | 1.810           |       |
| <b>D6</b>  | $g^-t(t)$     | 3.6            | 7.1%  | 3.1             | 7.2%  | 2.9                      | 7.1%  | 3.2             | 6.1%  | 4.007           |       |
| <b>D7</b>  | $tg^-(g^-)$   | 4.3            | 5.2%  | 3.5             | 6.3%  | 3.0                      | 6.8%  | 3.6             | 4.8%  | 1.692           |       |
| <b>D8</b>  | $g^-t(g^-)$   | 4.9            | 4.2%  | 4.1             | 4.8%  | 3.7                      | 5.1%  | 4.2             | 3.6%  | 2.363           |       |
| <b>D9</b>  | $tg^+(g^-)$   | 5.4            | 3.5%  | 4.1             | 4.9%  | 3.3                      | 5.9%  | 4.2             | 3.5%  | 3.854           |       |
| <b>D10</b> | $tt(t)$       | 7.0            | 0.9%  | 5.8             | 1.2%  | 5.1                      | 1.4%  | 6.2             | 0.6%  | 3.880           |       |
| <b>D11</b> | $tt(g^-)$     | 8.0            | 1.2%  | 6.7             | 1.7%  | 6.0                      | 2.0%  | 7.0             | 0.8%  | 1.954           |       |
| <b>D12</b> | $g^-t(g^+)$   | 8.8            | 0.9%  | 7.5             | 1.2%  | 6.8                      | 1.5%  | 7.7             | 0.5%  | 2.460           |       |
| <b>D13</b> | $g^-g^+(t)$   | 11.8           | 0.3%  | 9.6             | 0.5%  | 8.2                      | 0.8%  | 9.7             | 0.2%  | 4.051           |       |
|            |               |                |       |                 |       |                          |       |                 |       | $\bar{\mu}$ (D) | 2.514 |

**2.1.6 Table S6. Free energy differences ( $\Delta G$ ,  $\text{kJ mol}^{-1}$ ) and conformational distribution ( $p_i$ , %) of 4,4-difluoropentan-2-ol (E) in various solvents ( $\text{CCl}_4$ , and  $\text{CHCl}_3$ ) at various temperatures (298K and 223K) calculated at the IEFPCM-MP2/6-311++G(2d,p)//MPWB1K/6-31+G(d,p) level of theory.**

|    |                  | $\text{CCl}_4$ |               | $\text{CHCl}_3$ |               | $\text{CHCl}_3$ |               | $\mu$ (D)       | 298K  |
|----|------------------|----------------|---------------|-----------------|---------------|-----------------|---------------|-----------------|-------|
|    |                  | $\Delta G$     | 298K<br>$p_i$ | $\Delta G$      | 298K<br>$p_i$ | $\Delta G$      | 223K<br>$p_i$ |                 |       |
| E1 | $g^-g^-t(t)$     | 0.0            | 49.5%         | 0.0             | 48.2%         | 0.0             | 47.8%         | 3.594           |       |
| E2 | $g^-g^+g^-(g^+)$ | 1.0            | 33.0%         | 1.1             | 30.6%         | 0.5             | 36.9%         | 3.468           |       |
| E3 | $g^-g^+t(g^+)$   | 3.4            | 12.7%         | 3.2             | 13.3%         | 2.6             | 12.0%         | 3.526           |       |
| E4 | $g^-g^+g^-(t)$   | 8.7            | 1.5%          | 7.4             | 2.4%          | 7.3             | 0.9%          | 2.639           |       |
| E5 | $tg^+g^-(t)$     | 9.0            | 1.3%          | 8.8             | 1.4%          | 8.1             | 0.6%          | 1.030           |       |
| E6 | $g^-g^+t(t)$     | 9.9            | 0.9%          | 8.1             | 1.8%          | 7.3             | 0.9%          | 5.074           |       |
| E7 | $tg^-t(t)$       | 10.6           | 0.7%          | 9.6             | 1.0%          | 8.7             | 0.4%          | 4.073           |       |
| E8 | $g^-g^+g^-(g^-)$ | 11.2           | 0.5%          | 9.1             | 1.2%          | 9.2             | 0.3%          | 4.816           |       |
|    |                  |                |               |                 |               |                 |               | $\bar{\mu}$ (D) | 3.534 |

**2.1.7 Table S7. Free energy differences ( $\Delta G$ , kJ mol<sup>-1</sup>) and conformational distribution ( $p_i$ , %) of 4,4-difluorobutan-2-ol (F) in various solvents (CCl<sub>4</sub>, and CHCl<sub>3</sub>) at various temperatures (298K and 223K) calculated at the IEFPCM-MP2/6-311++G(2d,p)//MPWB1K/6-31+G(d,p) level of theory.**

|     |                                                               | CCl <sub>4</sub> | 298K  | CHCl <sub>3</sub> | 298K  | CHCl <sub>3</sub> | 223K  | CHCl <sub>3</sub> | 298K  |
|-----|---------------------------------------------------------------|------------------|-------|-------------------|-------|-------------------|-------|-------------------|-------|
|     |                                                               | $\Delta G$       | $p_i$ | $\Delta G$        | $p_i$ | $\Delta G$        | $p_i$ | $\mu$ (D)         |       |
| F1  | <i>g<sup>-</sup>g<sup>-</sup>t(t)</i>                         | 0.0              | 53.0% | 0.0               | 47.9% | 0.0               | 65.5% | 3.899             |       |
| F2  | <i>g<sup>-</sup>g<sup>-</sup>t(g<sup>-</sup>)</i>             | 3.4              | 13.6% | 2.8               | 15.6% | 2.8               | 14.7% | 3.893             |       |
| F3  | <i>g<sup>-</sup>g<sup>+</sup>g<sup>-</sup>(g<sup>+</sup>)</i> | 5.2              | 6.6%  | 5.3               | 5.5%  | 5.0               | 4.5%  | 2.965             |       |
| F4  | <i>g<sup>-</sup>g<sup>+</sup>t(g<sup>+</sup>)</i>             | 5.9              | 4.8%  | 5.9               | 4.5%  | 5.5               | 3.4%  | 2.987             |       |
| F5  | <i>tg<sup>+</sup>t(t)</i>                                     | 6.5              | 3.8%  | 5.9               | 4.5%  | 6.1               | 2.5%  | 3.063             |       |
| F6  | <i>g<sup>+</sup>g<sup>+</sup>g<sup>-</sup>(t)</i>             | 6.6              | 3.7%  | 6.7               | 3.2%  | 6.7               | 1.7%  | 4.019             |       |
| F7  | <i>tg<sup>+</sup>t(g<sup>+</sup>)</i>                         | 6.9              | 3.3%  | 6.2               | 3.9%  | 6.4               | 2.1%  | 0.976             |       |
| F8  | <i>tg<sup>-</sup>t(t)</i>                                     | 8.0              | 2.1%  | 7.5               | 2.4%  | 7.9               | 0.9%  | 2.820             |       |
| F9  | <i>g<sup>-</sup>g<sup>+</sup>t(t)</i>                         | 8.0              | 2.1%  | 6.2               | 3.9%  | 7.0               | 1.5%  | 1.441             |       |
| F10 | <i>tg<sup>+</sup>t(g<sup>-</sup>)</i>                         | 9.0              | 1.4%  | 7.9               | 2.0%  | 8.1               | 0.8%  | 3.591             |       |
| F11 | <i>g<sup>+</sup>g<sup>+</sup>g<sup>-</sup>(g<sup>+</sup>)</i> | 9.4              | 1.2%  | 8.8               | 1.4%  | 8.6               | 0.6%  | 3.425             |       |
| F12 | <i>tg<sup>+</sup>g<sup>-</sup>(t)</i>                         | 9.5              | 1.1%  | 9.4               | 1.1%  | 9.5               | 0.4%  | 1.043             |       |
| F13 | <i>tg<sup>-</sup>t(g<sup>-</sup>)</i>                         | 10.1             | 0.9%  | 9.3               | 1.1%  | 9.7               | 0.3%  | 1.441             |       |
| F14 | <i>g<sup>-</sup>g<sup>+</sup>g<sup>-</sup>(t)</i>             | 10.1             | 0.9%  | 8.7               | 1.5%  | 9.3               | 0.4%  | 3.174             |       |
| F15 | <i>tg<sup>+</sup>g<sup>-</sup>(g<sup>-</sup>)</i>             | 10.8             | 0.7%  | 10.3              | 0.8%  | 10.6              | 0.2%  | 2.669             |       |
| F16 | <i>tg<sup>-</sup>t(g<sup>+</sup>)</i>                         | 10.8             | 0.7%  | 9.6               | 1.0%  | 9.9               | 0.3%  | 2.875             |       |
|     |                                                               |                  |       |                   |       |                   |       | $\bar{\mu}$ (D)   | 3.437 |



**2.1.8 Table S8. Free energy differences ( $\Delta G$ , kJ mol<sup>-1</sup>) and conformational distribution ( $p_i$ , %) of 3,3-difluoropropan-1-ol (G) in various solvents (CCl<sub>4</sub>, and CHCl<sub>3</sub>) at various temperatures (298K and 223K) calculated at the IEFPCM-MP2/6-311++G(2d,p)//MPWB1K/6-31+G(d,p) level of theory.**

|            |               | CCl <sub>4</sub> |       | CHCl <sub>3</sub> |       | CHCl <sub>3</sub> |       | CHCl <sub>3</sub> | 298K  |
|------------|---------------|------------------|-------|-------------------|-------|-------------------|-------|-------------------|-------|
|            |               | 298K             | 298K  | 298K              | 298K  | 223K              | 298K  |                   |       |
|            |               | $\Delta G$       | $p_i$ | $\Delta G$        | $p_i$ | $\Delta G$        | $p_i$ | $\mu$ (D)         |       |
| <b>G1</b>  | $g^-g^-(t)$   | 0.0              | 51.2% | 0.0               | 43.3% | 0.0               | 58.7% | 3.697             |       |
| <b>G2</b>  | $g^-g^-(g^-)$ | 3.4              | 13.2% | 2.5               | 15.7% | 2.4               | 15.9% | 3.734             |       |
| <b>G3</b>  | $tg^-(t)$     | 4.4              | 8.6%  | 3.7               | 9.9%  | 4.1               | 6.6%  | 3.343             |       |
| <b>G4</b>  | $g^-g^+(g^+)$ | 5.8              | 4.9%  | 5.5               | 4.8%  | 5.1               | 3.8%  | 2.919             |       |
| <b>G5</b>  | $tg^+(t)$     | 4.3              | 4.5%  | 3.9               | 4.4%  | 4.2               | 3.0%  | 1.000             |       |
| <b>G6</b>  | $g^-g^+(g^+)$ | 6.0              | 4.6%  | 6.0               | 3.9%  | 5.5               | 3.1%  | 2.910             |       |
| <b>G7</b>  | $tg^-(g^-)$   | 6.7              | 3.4%  | 5.7               | 4.3%  | 5.9               | 2.5%  | 1.002             |       |
| <b>G8</b>  | $tg^+(g^-)$   | 6.8              | 3.3%  | 5.8               | 4.1%  | 6.1               | 2.2%  | 3.086             |       |
| <b>G9</b>  | $tg^-(g^+)$   | 7.6              | 2.3%  | 6.3               | 3.5%  | 6.4               | 1.8%  | 3.369             |       |
| <b>G10</b> | $g^-g^+(g^-)$ | 9.3              | 1.2%  | 8.2               | 1.6%  | 8.3               | 0.7%  | 2.886             |       |
| <b>G11</b> | $g^-g^+(t)$   | 9.4              | 1.2%  | 7.4               | 2.2%  | 7.6               | 1.0%  | 4.805             |       |
| <b>G12</b> | $g^-g^+(g^-)$ | 9.5              | 1.1%  | 8.1               | 1.7%  | 8.5               | 0.6%  | 2.998             |       |
| <b>G13</b> | $g^-g^+(g^-)$ | 12.1             | 0.4%  | 10.0              | 0.8%  | 10.3              | 0.2%  | 4.647             |       |
|            |               |                  |       |                   |       |                   |       | $\bar{\mu}$ (D)   | 3.334 |

**2.1.9 Table S9. Free energy differences ( $\Delta G$ ,  $\text{kJ mol}^{-1}$ ) and conformational distribution ( $p_i$ , %) of 4,4,4-trifluorobutan-2-ol (H) in various solvents ( $\text{CCl}_4$ ,  $\text{CHCl}_3$  and  $\text{CH}_2\text{Cl}_2$ ) at various temperatures (298K and 223K) calculated at the IEFPCM-MP2/6-311++G(2d,p)//MPWB1K/6-31+G(d,p) level of theory.**

|    |            | $\text{CCl}_4$ | 298K  | $\text{CHCl}_3$ | 298K  | $\text{CH}_2\text{Cl}_2$ | 298K  | $\text{CHCl}_3$ | 223K  | $\text{CHCl}_3$ | 298K  |
|----|------------|----------------|-------|-----------------|-------|--------------------------|-------|-----------------|-------|-----------------|-------|
|    |            | $\Delta G$     | $p_i$ | $\Delta G$      | $p_i$ | $\Delta G$               | $p_i$ | $\Delta G$      | $p_i$ | $\mu$ (D)       |       |
| H1 | $g^-(g^+)$ | 0.0            | 61.8% | 0.0             | 47.1% | 0.0                      | 39.2% | 0.0             | 60.7% | 2.036           |       |
| H2 | $g^-(t)$   | 2.6            | 21.4% | 1.0             | 31.7% | 0.1                      | 37.1% | 1.6             | 25.9% | 4.427           |       |
| H3 | $g^-(g^-)$ | 5.8            | 6.0%  | 3.8             | 10.1% | 2.8                      | 12.9% | 4.1             | 6.5%  | 4.339           |       |
| H4 | $t(g^+)$   | 5.9            | 5.8%  | 5.0             | 6.3%  | 4.5                      | 6.3%  | 5.2             | 3.7%  | 2.085           |       |
| H5 | $t(g^-)$   | 7.6            | 2.9%  | 6.9             | 3.0%  | 6.5                      | 2.9%  | 6.8             | 1.5%  | 2.521           |       |
| H6 | $t(t)$     | 8.4            | 2.1%  | 8.0             | 1.8%  | 7.9                      | 1.6%  | 6.6             | 1.7%  | 2.928           |       |
|    |            |                |       |                 |       |                          |       |                 |       | $\bar{\mu}$ (D) | 3.059 |

**2.1.10 Table S10. Free energy differences ( $\Delta G$ ,  $\text{kJ mol}^{-1}$ ) and conformational distribution ( $p_i$ , %) of 3,3,3-trifluoropropan-1-ol (I) in various solvents ( $\text{CCl}_4$ ,  $\text{CHCl}_3$  and  $\text{CH}_2\text{Cl}_2$ ) at various temperatures (298K and 223K) calculated at the IEFPCM-MP2/6-311++G(2d,p)//MPWB1K/6-31+G(d,p) level of theory.**

|    |            | $\text{CCl}_4$ | 298K  | $\text{CHCl}_3$ | 298K  | $\text{CH}_2\text{Cl}_2$ | 298K  | $\text{CHCl}_3$ | 223K  | $\text{CHCl}_3$ | 298K  |
|----|------------|----------------|-------|-----------------|-------|--------------------------|-------|-----------------|-------|-----------------|-------|
|    |            | $\Delta G$     | $p_i$ | $\Delta G$      | $p_i$ | $\Delta G$               | $p_i$ | $\Delta G$      | $p_i$ | $\mu$ (D)       |       |
| I1 | $t(t)$     | 0.0            | 34.3% | 0.0             | 30.7% | 0.0                      | 28.1% | 0.0             | 33.3% | 2.758           |       |
| I2 | $g^-(g^+)$ | 2.2            | 28.0% | 2.5             | 22.5% | 2.6                      | 19.7% | 1.7             | 26.5% | 1.882           |       |
| I3 | $t(g^+)$   | 2.9            | 21.3% | 2.3             | 24.4% | 1.9                      | 25.9% | 2.1             | 21.0% | 2.465           |       |
| I4 | $g^-(t)$   | 3.6            | 16.3% | 2.5             | 22.4% | 1.9                      | 26.2% | 2.3             | 19.2% | 4.136           |       |
|    |            |                |       |                 |       |                          |       |                 |       | $\bar{\mu}$ (D) | 2.798 |

**2.1.11 Table S11. Free energy differences ( $\Delta G$ , kJ mol<sup>-1</sup>) and conformational distribution ( $p_i$ , %) of *syn*-4-methoxypentan-2-ol (*syn*-J) and *anti*-4-methoxypentan-2-ol (*anti*-J) in various solvents (CCl<sub>4</sub>, CHCl<sub>3</sub>) calculated at the IEFPCM-MP2/6-311++G(2d,p)//MPWB1K/6-31+G(d,p) level of theory.**

|                | CCl <sub>4</sub> | 298K  | CHCl <sub>3</sub> | 298K  |                 | CCl <sub>4</sub> | 298K  | CHCl <sub>3</sub> | 298K  |
|----------------|------------------|-------|-------------------|-------|-----------------|------------------|-------|-------------------|-------|
|                | $\Delta G$       | $p_i$ | $\Delta G$        | $p_i$ |                 | $\Delta G$       | $p_i$ | $\Delta G$        | $p_i$ |
| <i>syn</i> -J1 | 0.0              | 94.7% | 0.0               | 93.9% | <i>anti</i> -J1 | 0.0              | 31.3% | 0.0               | 33.4% |
| <i>syn</i> -J2 | 9.2              | 2.3%  | 11.6              | 0.9%  | <i>anti</i> -J2 | 0.1              | 29.8% | 0.4               | 28.4% |
| <i>syn</i> -J3 | 9.5              | 2.0%  | 11.7              | 0.8%  | <i>anti</i> -J3 | 0.9              | 21.9% | 1.1               | 21.2% |
| <i>syn</i> -J4 | 11.4             | 0.9%  | 7.6               | 4.4%  | <i>anti</i> -J4 | 3.3              | 8.3%  | 3.7               | 7.5%  |
|                |                  |       |                   |       | <i>anti</i> -J5 | 3.6              | 7.3%  | 3.5               | 8.1%  |
|                |                  |       |                   |       | <i>anti</i> -J6 | 7.6              | 1.5%  | 7.9               | 1.4%  |

**2.1.12 Table S12. Free energy differences ( $\Delta G$ , kJ mol<sup>-1</sup>) and conformational distribution ( $p_i$ , %) of *syn*-2-fluoro-4-methoxypentane (*syn*-K) and *anti*-2-fluoro-4-methoxypentane (*anti*-K) in various solvents (CCl<sub>4</sub>, CHCl<sub>3</sub>) calculated at the IEFPCM-MP2/6-311++G(2d,p)//MPWB1K/6-31+G(d,p) level of theory.**

|                | CCl <sub>4</sub> | 298K  | CHCl <sub>3</sub> | 298K  |                 | CCl <sub>4</sub> | 298K  | CHCl <sub>3</sub> | 298K  |
|----------------|------------------|-------|-------------------|-------|-----------------|------------------|-------|-------------------|-------|
|                | $\Delta G$       | $p_i$ | $\Delta G$        | $p_i$ |                 | $\Delta G$       | $p_i$ | $\Delta G$        | $p_i$ |
| <i>syn</i> -K1 | 0.0              | 44.7% | 0.0               | 44.3% | <i>anti</i> -K1 | 0.0              | 88.3% | 0.0               | 86.6% |
| <i>syn</i> -K2 | 1.9              | 20.7% | 1.8               | 21.2% | <i>anti</i> -K2 | 6.9              | 5.5%  | 6.8               | 5.5%  |
| <i>syn</i> -K3 | 2.9              | 14.0% | 2.7               | 15.1% | <i>anti</i> -K3 | 9.1              | 2.2%  | 8.5               | 2.9%  |
| <i>syn</i> -K4 | 3.6              | 10.3% | 4.2               | 8.2%  | <i>anti</i> -K4 | 9.5              | 1.9%  | 9.2               | 2.1%  |
| <i>syn</i> -K5 | 7.0              | 2.6%  | 7.4               | 2.3%  | <i>anti</i> -K5 | 10.7             | 1.2%  | 9.7               | 1.7%  |
| <i>syn</i> -K6 | 7.2              | 2.4%  | 7.2               | 2.5%  | <i>anti</i> -K6 | 11.5             | 0.8%  | 10.5              | 1.3%  |
| <i>syn</i> -K7 | 7.5              | 2.2%  | 7.5               | 2.2%  |                 |                  |       |                   |       |
| <i>syn</i> -K8 | 8.0              | 1.7%  | 8.0               | 1.7%  |                 |                  |       |                   |       |
| <i>syn</i> -K9 | 8.6              | 1.4%  | 7.0               | 2.6%  |                 |                  |       |                   |       |

**2.2 Depiction of the optimized structures at the IEFPCM-MPWB1K/6-31+G(d,p) level of theory****2.2.1 *syn*-4-fluoropentan-2-ol (*syn*-A)**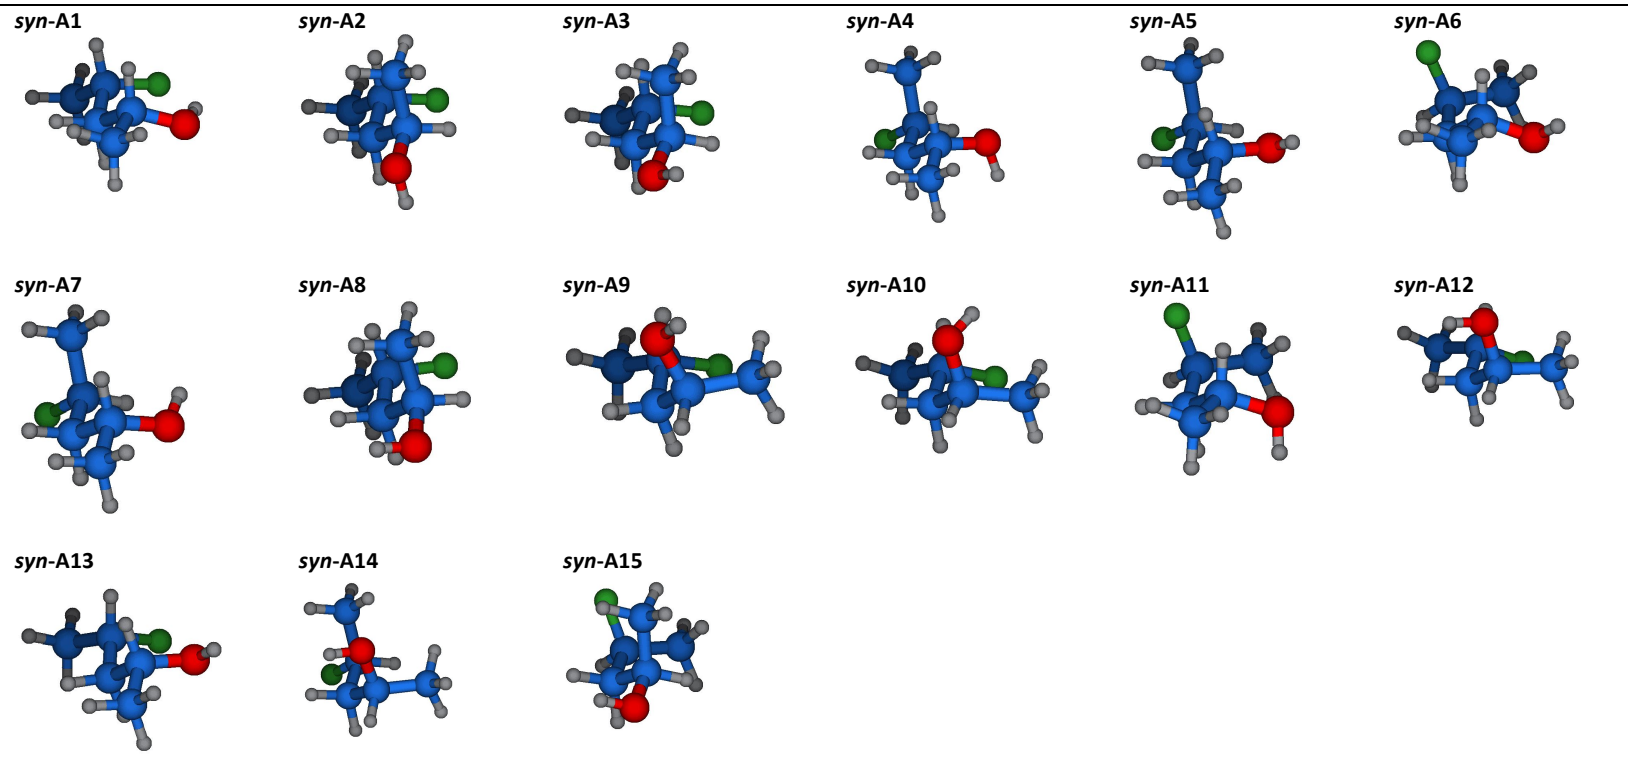

**2.2.2 anti-4-fluoropentan-2-ol (anti-A)***anti-A1*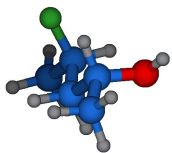*anti-A2*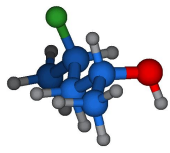*anti-A3*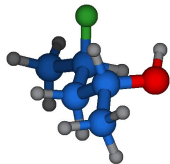*anti-A4*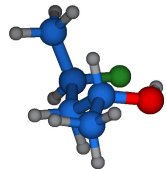*anti-A5*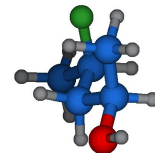*anti-A6*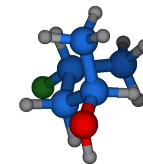*anti-A7*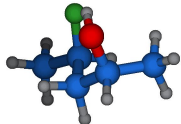*anti-A8*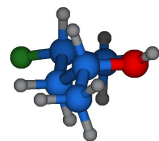*anti-A9*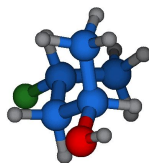*anti-A10*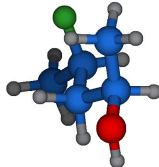*anti-A11*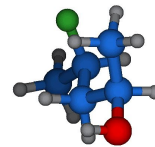*anti-A12*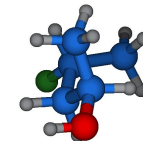*anti-A13*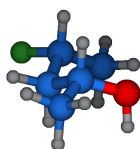*anti-A14*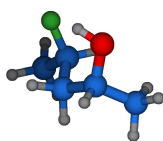

**2.2.3 4-fluorobutan-2-ol (B)**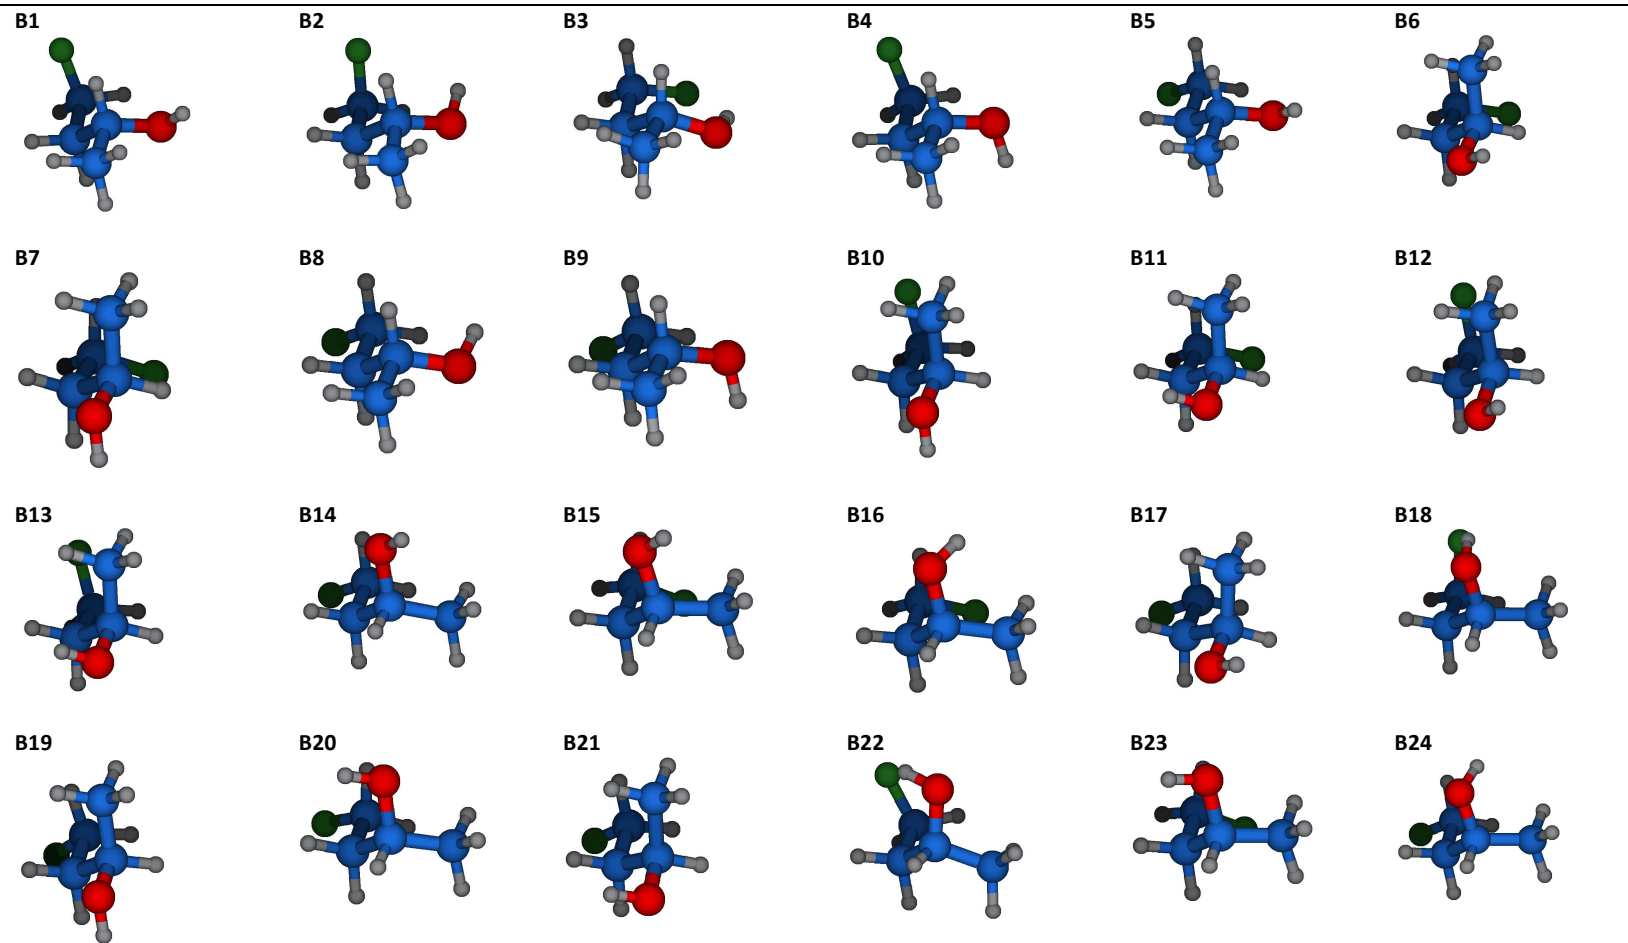

**2.2.4 2,2-dimethyl-3-fluoropropan-1-ol (C)**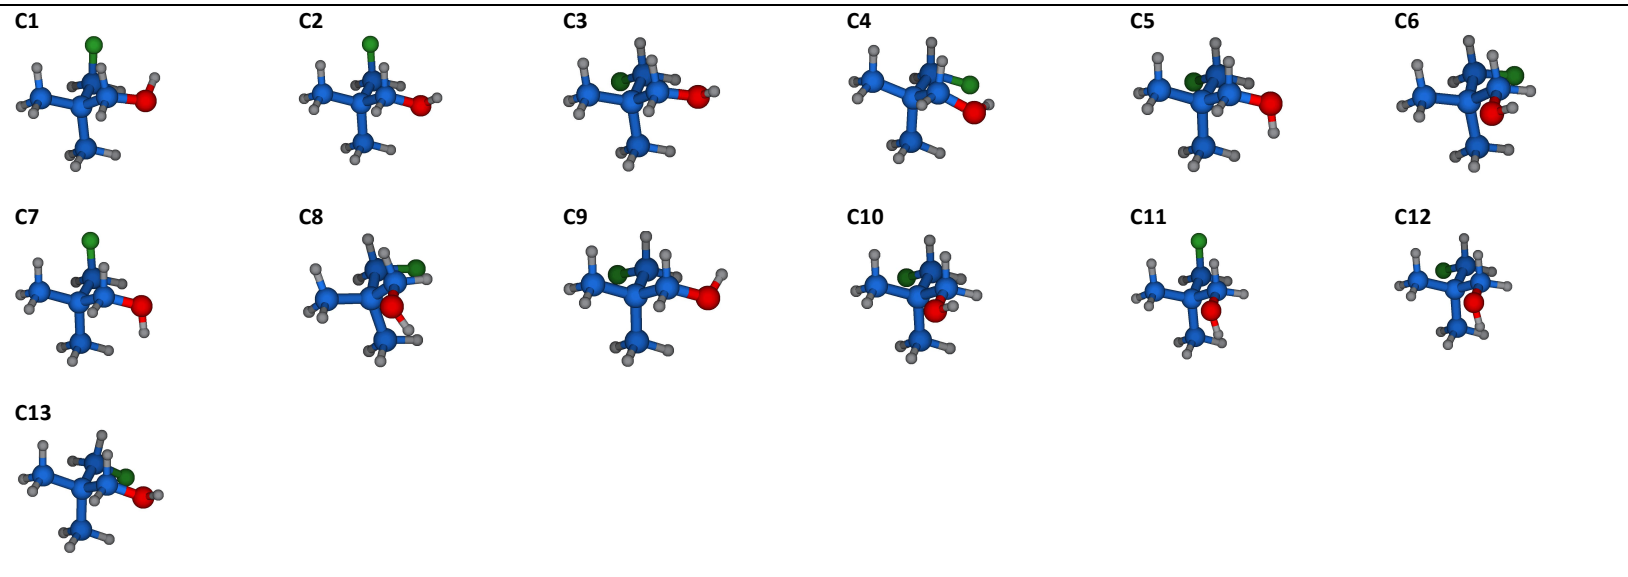**2.2.5 3-fluoropropan-1-ol (D)**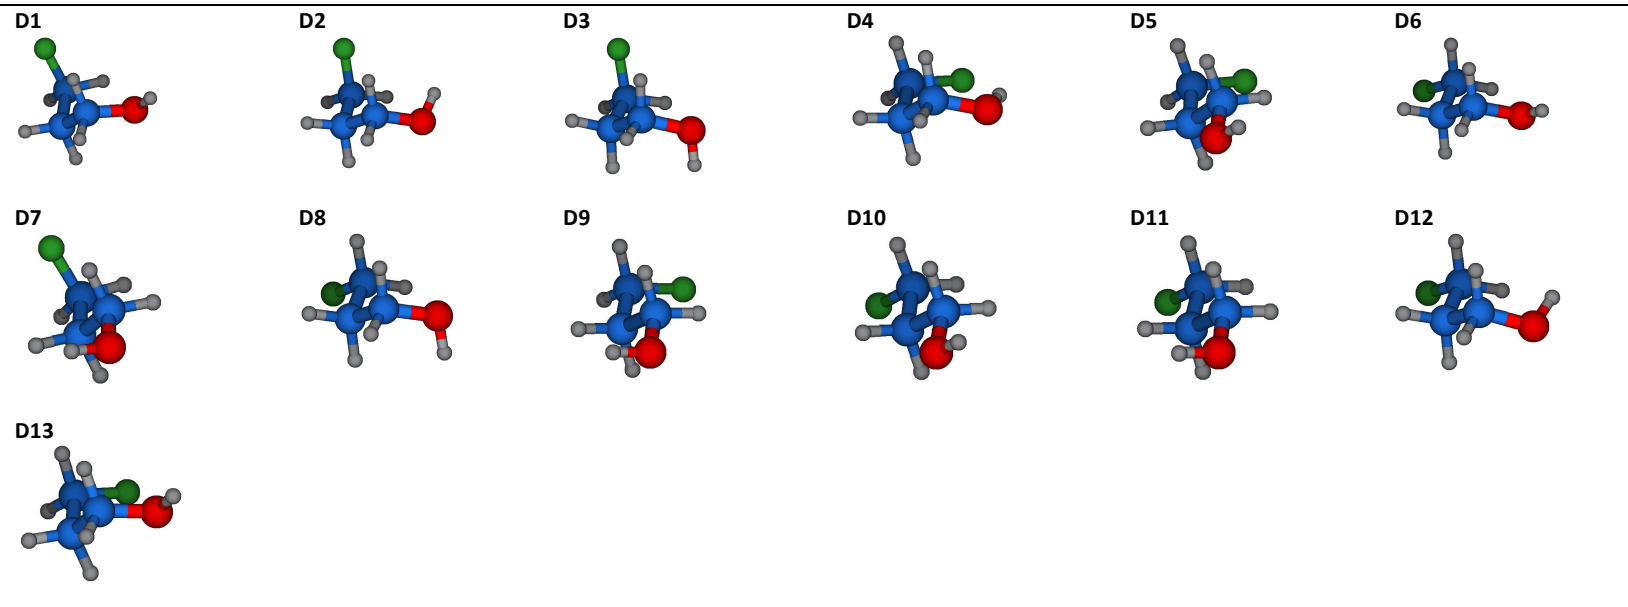

**2.2.6 4,4-difluoropentan-2-ol (E)**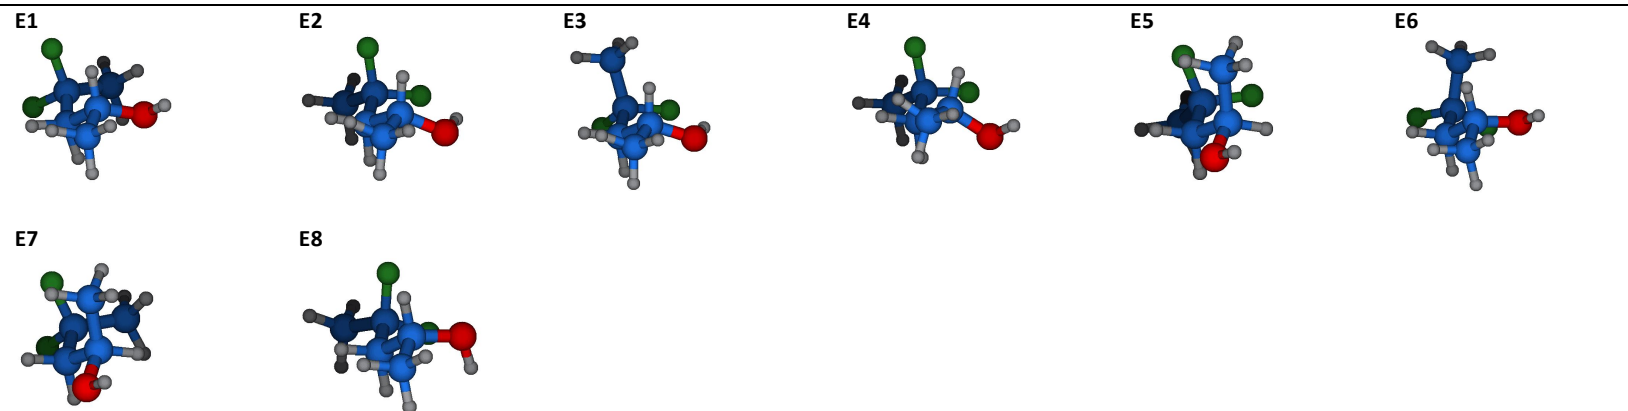**2.2.7 3,3-difluorobutan-2-ol (F)**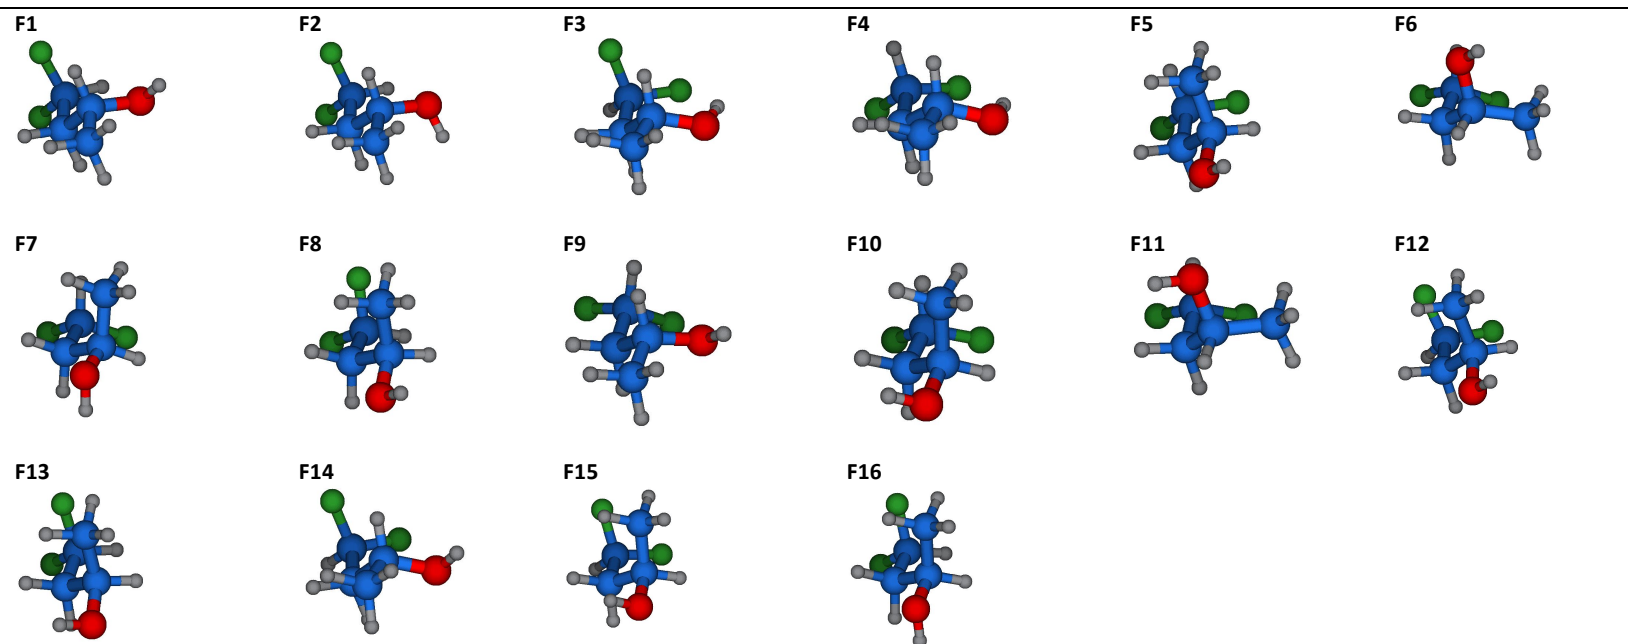



**2.2.8 3,3-difluoropropan-1-ol (G)**

G1

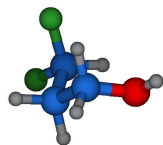

G2

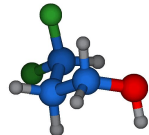

G3

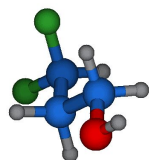

G4

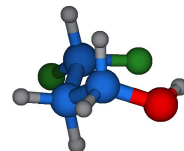

G5

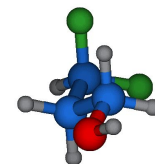

G6

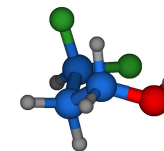

G7

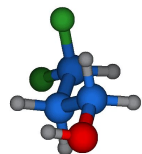

G8

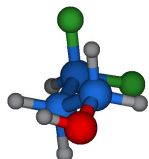

G9

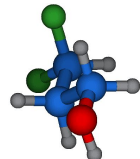

G10

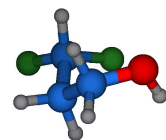

G11

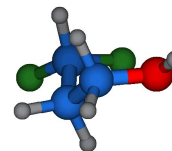

G12

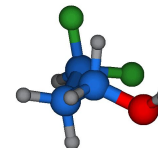

G13

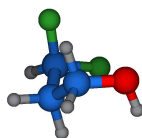**2.2.9 4,4,4-trifluorobutan-2-ol (H)**

H1

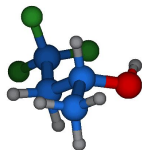

H2

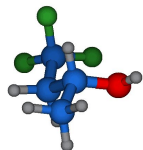

H3

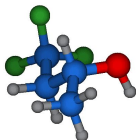

H4

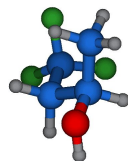

H5

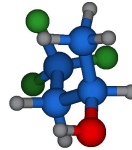

H6

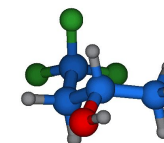**2.2.10 3,3,3-trifluoropropan-1-ol (I)**

I1

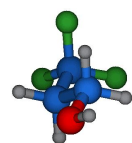

I2

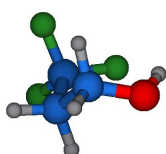

I3

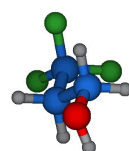

I4

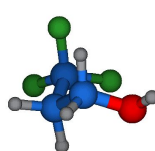

**2.2.11 *syn*-4-methoxypentan-2-ol (*syn*-J)***syn*-J1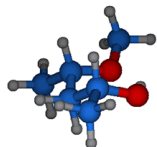*syn*-J2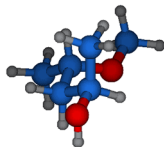*syn*-J3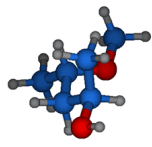*syn*-J4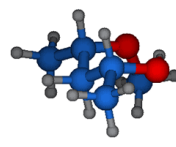**2.2.12 *anti*-4-methoxypentan-2-ol (*anti*-J)***anti*-J1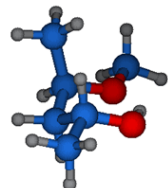*anti*-J2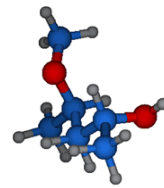*anti*-J3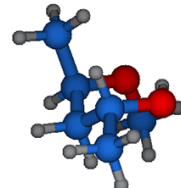*anti*-J4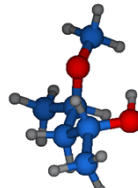*anti*-J5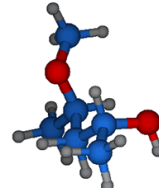*anti*-J6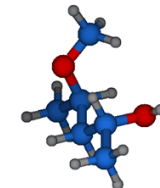**2.2.13 *syn*-2-fluoro-4-methoxypentane (*syn*-K)***syn*-K1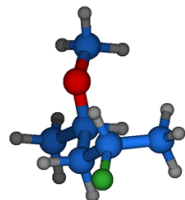*syn*-K2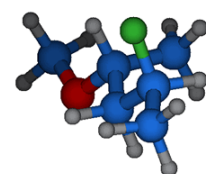*syn*-K3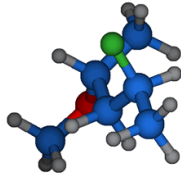*syn*-K4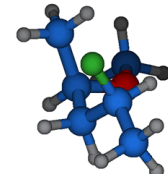*syn*-K5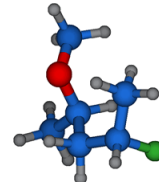*syn*-K6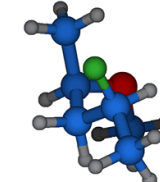*syn*-K7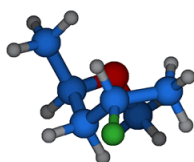*syn*-K8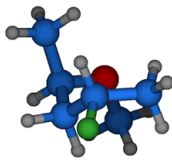*syn*-K9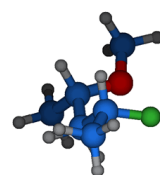

**2.2.14 anti-2-fluoro-4-methoxypentane (*anti*-K)***anti*-K1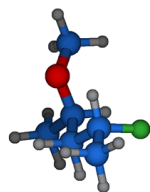*anti*-K2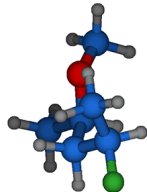*anti*-K3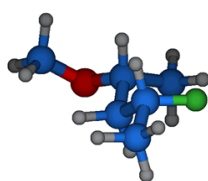*anti*-K4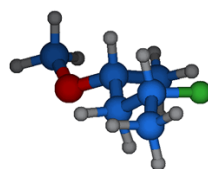*anti*-K5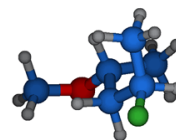*anti*-K6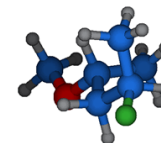

**2.3 Table S13. Characteristic properties of the OH...F IMHB encountered in the relevant conformers of compounds A-I. AIM electron density ( $\rho$ , e bohr<sup>-3</sup>) at the bond critical points, energy of H-bond ( $E_{\text{HB}}$ , kJ·mol<sup>-1</sup>), NCI attractive and repulsive contributions of the OH...F interaction ( $\text{sign}(\lambda_2)\rho$ , e bohr<sup>-3</sup>) and NBO interaction energy ( $E_{\text{n}\rightarrow\text{s}}^{(2)}$ , kJ mol<sup>-1</sup>)**

| Compound | Conformer | $d_{(\text{OH}\cdots\text{F})}$ <sup>a,b</sup> | $\rho$ <sup>c</sup> | $E_{\text{HB}}$ <sup>c</sup> | $\text{sign}(\lambda_2)\rho$ <sup>c,d</sup> | $\text{sign}(\lambda_2)\rho$ <sup>c,d</sup> | $E_{\text{n}\rightarrow\text{s}}^{(2)}$ <sup>a</sup> |
|----------|-----------|------------------------------------------------|---------------------|------------------------------|---------------------------------------------|---------------------------------------------|------------------------------------------------------|
| Syn-A    | syn-A1    | 2.000                                          | 0.0206              | 24.4                         | -0.0206                                     | 0.0142                                      | 25.1                                                 |
| Anti-A   | anti_A4   | 2.008                                          | 0.0202              | 23.7                         | -0.0199                                     | 0.0139                                      | 24.7                                                 |
|          | anti_A7   | 2.056                                          | 0.0186              | 21.6                         | -0.0186                                     | 0.0139                                      | 20.1                                                 |
| B        | B3        | 2.037                                          | 0.0190              | 22.0                         | -0.0188                                     | 0.0134                                      | 22.3                                                 |
|          | B18       | 2.091                                          | 0.0173              | 19.8                         |                                             |                                             | 18.2                                                 |
| C        | C4        | 2.065                                          | 0.0184              | 21.4                         | -0.0182                                     | 0.0134                                      | 19.2                                                 |
| D        | D4        | 2.074                                          | 0.0178              | 20.4                         | -0.0178                                     | 0.0132                                      | 20.0                                                 |
| E        | E2        | 2.062                                          | 0.0185              | 21.7                         | -0.0182                                     | 0.0142                                      | 17.8                                                 |
|          | E3        | 2.050                                          | 0.0187              | 21.7                         | -0.0184                                     | 0.0140                                      | 19.4                                                 |
| F        | F3        | 2.133                                          | 0.0161              | 18.4                         | -0.0161                                     | 0.0128                                      | 13.8                                                 |
|          | F4        | 2.090                                          | 0.0173              | 19.8                         | -0.0162                                     | 0.0146                                      | 16.9                                                 |
| G        | G4        | 2.175                                          | 0.0148              | 16.6                         | -0.0128                                     | 0.0121                                      | 9.0                                                  |
|          | G6        | 2.201                                          | 0.0142              | 16.1                         | -0.0132                                     | 0.0118                                      | 10.5                                                 |
| H        | H1        | 2.172                                          | 0.0151              | 17.1                         | -0.0142                                     | 0.0126                                      | 10.9                                                 |
| I        | I2        | 2.234                                          | 0.0136              | 15.4                         | -0.0136                                     | 0.0125                                      | 8.3                                                  |

<sup>a</sup> At the IEFPCM-MPW1K/6-31+G(d,p) level. <sup>b</sup> in Å. <sup>c</sup> At the IEFPCM-MP2/6-311++G(2d,p) level. <sup>d</sup> Negative  $\text{sign}(\lambda_2)\rho$  values indicate attractive contributions to non-covalent interactions, while positive  $\text{sign}(\lambda_2)\rho$  values indicate repulsive contributions

### 3 NCI (Non-Covalent Interaction) analysis

3.1 Table S14. NCI isosurfaces and electron densities features,  $\text{sign}(\lambda_2)\rho$  and reduced density gradient (RDG) on IEFPCM-MP2/6-311++G(2d,p) wavefunctions in  $\text{CCl}_4$  for the main conformers of compound *syn-A*.

| <i>syn-A1</i>                                                                       |        |                              |        |                              |        | <i>syn-A2</i>                                                                        |        |                              |        |                              |        |
|-------------------------------------------------------------------------------------|--------|------------------------------|--------|------------------------------|--------|--------------------------------------------------------------------------------------|--------|------------------------------|--------|------------------------------|--------|
|                                                                                     |        | $\text{sign}(\lambda_2)\rho$ | RDG    | $\text{sign}(\lambda_2)\rho$ | RDG    |                                                                                      |        | $\text{sign}(\lambda_2)\rho$ | RDG    | $\text{sign}(\lambda_2)\rho$ | RDG    |
|    | OH...F | -0.0206                      | 0.0720 | 0.0142                       | 0.0549 |   | CH...F | -0.0101                      | 0.3014 | 0.0112                       | 0.2718 |
|                                                                                     |        |                              |        |                              |        |                                                                                      | CH...H | -0.0095                      | 0.0720 | 0.0098                       | 0.1455 |
| <i>syn-A3</i>                                                                       |        |                              |        |                              |        | <i>syn-A4</i>                                                                        |        |                              |        |                              |        |
|    | CH...F | -0.0106                      | 0.2847 | 0.0117                       | 0.2751 |   | CH...O | -0.0109                      | 0.2488 | 0.0121                       | 0.2321 |
|                                                                                     | CH...H | -0.0096                      | 0.0959 | 0.0101                       | 0.1061 |                                                                                      | CH...H | -0.0094                      | 0.1406 | 0.0098                       | 0.1145 |
| <i>syn-A5</i>                                                                       |        |                              |        |                              |        | <i>syn-A7</i>                                                                        |        |                              |        |                              |        |
|   | CH...O | -0.0113                      | 0.2132 | 0.0118                       | 0.2140 |  | CH...O | -0.0091                      | 0.2627 | 0.0098                       | 0.2274 |
|                                                                                     | CH...H | -0.0096                      | 0.1253 | 0.0098                       | 0.1415 |                                                                                      | CH...H | -0.0091                      | 0.1091 | 0.0096                       | 0.1307 |
| <i>syn-A8</i>                                                                       |        |                              |        |                              |        |                                                                                      |        |                              |        |                              |        |
|  | CH...F | -0.0104                      | 0.2850 | 0.0108                       | 0.2843 |                                                                                      |        |                              |        |                              |        |
|                                                                                     | CH...H | -0.0095                      | 0.1259 | 0.0098                       | 0.0838 |                                                                                      |        |                              |        |                              |        |

**3.2 Table S15. NCI isosurfaces and electron densities features,  $\text{sign}(\lambda_2)\rho$  and reduced density gradient (RDG) on IEFPCM-MP2/6-311++G(2d,p) wavefunctions in  $\text{CCl}_4$  for the main conformers of compound *anti*-A.**

| <i>anti</i> -A1                                                                   |        |                              |        |                              |        | <i>anti</i> -A2                                                                     |        |                              |        |                              |        |
|-----------------------------------------------------------------------------------|--------|------------------------------|--------|------------------------------|--------|-------------------------------------------------------------------------------------|--------|------------------------------|--------|------------------------------|--------|
|                                                                                   |        | $\text{sign}(\lambda_2)\rho$ | RDG    | $\text{sign}(\lambda_2)\rho$ | RDG    |                                                                                     |        | $\text{sign}(\lambda_2)\rho$ | RDG    | $\text{sign}(\lambda_2)\rho$ | RDG    |
| 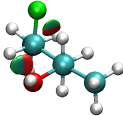 | CH...F | -0.0105                      | 0.2834 | 0.113                        | 0.2638 |  | CH...F | -0.0102                      | 0.3066 | 0.0117                       | 0.2816 |
|                                                                                   | CH...O | -0.0119                      | 0.2126 | 0.0123                       | 0.1836 |                                                                                     | CH...O | -0.0116                      | 0.2439 | 0.0122                       | 0.2094 |
| <i>anti</i> -A3                                                                   |        |                              |        |                              |        | <i>anti</i> -A4                                                                     |        |                              |        |                              |        |
|  | CH...O | -0.0118                      | 0.3111 | 0.0130                       | 0.2720 |  | OH...F | -0.0199                      | 0.0594 | 0.0139                       | 0.0726 |
|                                                                                   | OH...F | -0.0085                      | 0.2112 | 0.0089                       | 0.1965 |                                                                                     | CH...H | -0.0097                      | 0.1025 | 0.0101                       | 0.0717 |
| <i>anti</i> -A7                                                                   |        |                              |        |                              |        |                                                                                     |        |                              |        |                              |        |
|  | OH...F | -0.0186                      | 0.0521 | 0.0139                       | 0.0718 |                                                                                     |        |                              |        |                              |        |
|                                                                                   | CH...H | -0.0098                      | 0.1025 | 0.0101                       | 0.0718 |                                                                                     |        |                              |        |                              |        |

**3.3 Table S16. NCI isosurfaces and electron densities features,  $\text{sign}(\lambda_2)\rho$  and reduced density gradient (RDG) on IEFPCM-MP2/6-311++G(2d,p) wavefunctions in  $\text{CCl}_4$  for the main conformers of compound B.**

| B1                                                                                |        |                              |        |                              |        | B2                                                                                  |        |                              |        |                              |        |
|-----------------------------------------------------------------------------------|--------|------------------------------|--------|------------------------------|--------|-------------------------------------------------------------------------------------|--------|------------------------------|--------|------------------------------|--------|
|                                                                                   |        | $\text{sign}(\lambda_2)\rho$ | RDG    | $\text{sign}(\lambda_2)\rho$ | RDG    |                                                                                     |        | $\text{sign}(\lambda_2)\rho$ | RDG    | $\text{sign}(\lambda_2)\rho$ | RDG    |
| 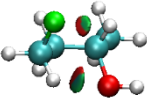 | CH...F | -0.0099                      | 0.4455 | 0.0105                       | 0.4480 |  | CH...F | -0.0097                      | 0.4073 | 0.0110                       | 0.3903 |
|                                                                                   | CH...O | -0.0114                      | 0.2511 | 0.0125                       | 0.2122 |                                                                                     | CH...O | -0.0104                      | 0.2800 | 0.0116                       | 0.2321 |
| B3                                                                                |        |                              |        |                              |        | B4                                                                                  |        |                              |        |                              |        |
|  | OH...F | -0.0188                      | 0.0998 | 0.0134                       | 0.1047 |  | CH...F | -0.0091                      | 0.4844 | 0.0098                       | 0.4821 |
|                                                                                   |        |                              |        |                              |        |                                                                                     | CH...O | -0.0013                      | 0.2264 | 0.0119                       | 0.2571 |
| B5                                                                                |        |                              |        |                              |        | B6                                                                                  |        |                              |        |                              |        |
|  | CH...O | -0.0113                      | 0.2355 | 0.0117                       | 0.2210 |  | CH...F | -0.0092                      | 0.1948 | 0.0094                       | 0.3389 |
|                                                                                   |        |                              |        |                              |        |                                                                                     | H...H  | -0.0095                      | 0.0965 | 0.0099                       | 0.1013 |

**3.4 Table S17. NCI isosurfaces and electron densities features,  $\text{sign}(\lambda_2)\rho$  and reduced density gradient (RDG) on IEFPCM-MP2/6-311++G(2d,p) wavefunctions in  $\text{CCl}_4$  for the main conformers of compound C.**

| <b>C1</b>                                                                                      |        | $\text{sign}(\lambda_2)\rho$ | RDG    | $\text{sign}(\lambda_2)\rho$ | RDG    | <b>C2</b>                                                                                        |        | $\text{sign}(\lambda_2)\rho$ | RDG     | $\text{sign}(\lambda_2)\rho$ | RDG    |
|------------------------------------------------------------------------------------------------|--------|------------------------------|--------|------------------------------|--------|--------------------------------------------------------------------------------------------------|--------|------------------------------|---------|------------------------------|--------|
| 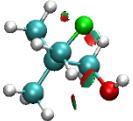              | CH...F | -0.0082                      | 0.5529 | 0.0112                       | 0.4344 |               | CH...F | -0.0108                      | 0.4102  | 0.0115                       | 0.2872 |
|                                                                                                |        | -0.0111                      | 0.3166 | 0.0142                       | 0.3423 |                                                                                                  |        | -0.0102                      | 0.3705  | 0.0117                       | 0.2997 |
|                                                                                                | CH...O | -0.0107                      | 0.3067 | 0.0129                       | 0.3246 |                                                                                                  | CH...O | -0.0117                      | 0.2626  | 0.0136                       | 0.2417 |
|                                                                                                |        | -0.0097                      | 0.3154 | 0.0112                       | 0.3160 |                                                                                                  |        | -0.0114                      | 0.2378  | 0.0127                       | 0.2050 |
| <b>C3</b><br> | CH...F | -0.0085                      | 0.5168 | 0.0126                       | 0.3396 | <b>C4</b><br> | OH...F | -0.0182                      | 0.1172  | 0.0134                       | 0.1359 |
|                                                                                                |        | -0.0102                      | 0.4243 | 0.0112                       | 0.4023 |                                                                                                  |        | CH...F/                      | -0.0121 | 0.3020                       | 0.0135 |
|                                                                                                | CH...O | -0.0111                      | 0.2878 | 0.0116                       | 0.2805 |                                                                                                  | CH...O |                              |         |                              |        |
|                                                                                                |        | -0.0116                      | 0.3039 | 0.0130                       | 0.2601 |                                                                                                  |        |                              |         |                              |        |
| <b>C5</b><br> | CH...F | -0.0081                      | 0.5566 | 0.0111                       | 0.3329 |                                                                                                  |        |                              |         |                              |        |
|                                                                                                |        | -0.0105                      | 0.4094 | 0.0110                       | 0.3908 |                                                                                                  |        |                              |         |                              |        |
|                                                                                                | CH...O | -0.0108                      | 0.2792 | 0.0111                       | 0.2109 |                                                                                                  |        |                              |         |                              |        |
|                                                                                                |        | -0.0100                      | 0.2496 | 0.0111                       | 0.2293 |                                                                                                  |        |                              |         |                              |        |



**3.5 Table S18.** NCI isosurfaces and electron densities features,  $\text{sign}(\lambda_2)\rho$  and reduced density gradient (RDG) on IEFPCM-MP2/6-311++G(2d,p) wavefunctions in  $\text{CCl}_4$  for the main conformers of compound D.

| D1                                                                                |        |                              |        |                              |        | D2                                                                                  |        |                              |        |                              |        |
|-----------------------------------------------------------------------------------|--------|------------------------------|--------|------------------------------|--------|-------------------------------------------------------------------------------------|--------|------------------------------|--------|------------------------------|--------|
|                                                                                   |        | $\text{sign}(\lambda_2)\rho$ | RDG    | $\text{sign}(\lambda_2)\rho$ | RDG    |                                                                                     |        | $\text{sign}(\lambda_2)\rho$ | RDG    | $\text{sign}(\lambda_2)\rho$ | RDG    |
|  | CH...F | -0.0089                      | 0.3842 | 0.0098                       | 0.3397 |  | CH...F | -0.0093                      | 0.4047 | 0.0097                       | 0.3580 |
|                                                                                   | CH...O | -0.0105                      | 0.2574 | 0.0113                       | 0.2196 |                                                                                     | CH...O | -0.0096                      | 0.3012 | 0.0101                       | 0.2805 |
| D3                                                                                |        |                              |        |                              |        | D4                                                                                  |        |                              |        |                              |        |
|  | CH...F | -0.0084                      | 0.3962 | 0.0094                       | 0.3627 |  | OH...F | -0.01775                     | 0.1254 | 0.0132                       | 0.1844 |
|                                                                                   | CH...O | -0.0104                      | 0.2888 | 0.1061                       | 0.2798 |                                                                                     |        |                              |        |                              |        |
| D5                                                                                |        |                              |        |                              |        | D6                                                                                  |        |                              |        |                              |        |
|  | CH...F | -0.0081                      | 0.4824 | 0.0095                       | 0.3890 |  | CH...O | -0.0100                      | 0.3106 | 0.0105                       | 0.2859 |

**3.6 Table S19.** NCI isosurfaces and electron densities features,  $\text{sign}(\lambda_2)\rho$  and reduced density gradient (RDG) on IEFPCM-MP2/6-311++G(2d,p) wavefunctions in  $\text{CCl}_4$  for the main conformers of compound E.

| E1                                                                                  |        |                              |        |                              |        | E2                                                                                    |        |                              |        |                              |        |
|-------------------------------------------------------------------------------------|--------|------------------------------|--------|------------------------------|--------|---------------------------------------------------------------------------------------|--------|------------------------------|--------|------------------------------|--------|
|                                                                                     |        | $\text{sign}(\lambda_2)\rho$ | RDG    | $\text{sign}(\lambda_2)\rho$ | RDG    |                                                                                       |        | $\text{sign}(\lambda_2)\rho$ | RDG    | $\text{sign}(\lambda_2)\rho$ | RDG    |
|  | CH...F | -0.0105                      | 0.3471 | 0.0098                       | 0.0603 |  | OH...F | -0.0182                      | 0.2476 | 0.0142                       | 0.2442 |
|                                                                                     | CH...O | -0.0122                      | 0.1169 | 0.0105                       | 0.5618 |                                                                                       | CH...F | -0.0101                      | 0.3743 | 0.0139                       | 0.1434 |
| E3                                                                                  |        |                              |        |                              |        |                                                                                       |        |                              |        |                              |        |
|  | OH...F | -0.0184                      | 0.1207 | 0.0140                       | 0.2607 |                                                                                       |        |                              |        |                              |        |
|                                                                                     | H...H  | -0.0084                      | 0.2774 | 0.0096                       | 0.1740 |                                                                                       |        |                              |        |                              |        |

**3.7 Table S20. NCI isosurfaces and electron densities features,  $\text{sign}(\lambda_2)\rho$  and reduced density gradient (RDG) on IEFPCM-MP2/6-311++G(2d,p) wavefunctions in  $\text{CCl}_4$  for the main conformers of compound F.**

| F1                                                                                |        |                              |        |                              |        | F2                                                                                  |        |                              |        |                              |        |
|-----------------------------------------------------------------------------------|--------|------------------------------|--------|------------------------------|--------|-------------------------------------------------------------------------------------|--------|------------------------------|--------|------------------------------|--------|
|                                                                                   |        | $\text{sign}(\lambda_2)\rho$ | RDG    | $\text{sign}(\lambda_2)\rho$ | RDG    |                                                                                     |        | $\text{sign}(\lambda_2)\rho$ | RDG    | $\text{sign}(\lambda_2)\rho$ | RDG    |
| 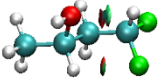 | CH...F | -0.0103                      | 0.5832 | 0.0122                       | 0.3701 |  | CH...F | -0.0090                      | 0.5849 | 0.0103                       | 0.4210 |
|                                                                                   | CH...O | -0.0119                      | 0.3651 | 0.0123                       | 0.2761 |                                                                                     | CH...O | -0.0106                      | 0.6768 | 0.0138                       | 0.4144 |
| F3                                                                                |        |                              |        |                              |        | F4                                                                                  |        |                              |        |                              |        |
|  | OH...F | -0.0161                      | 0.1575 | 0.0128                       | 0.1105 |  | OH...F | -0.0162                      | 0.2283 | 0.0146                       | 0.2822 |
|                                                                                   | CH...F | -0.0097                      | 0.3333 | 0.0108                       | 0.2888 |                                                                                     |        |                              |        |                              |        |
| F5                                                                                |        |                              |        |                              |        | F6                                                                                  |        |                              |        |                              |        |
|  | CH...F | -0.0082                      | 0.3061 | 0.0096                       | 0.2586 |  | CH...F | -0.0103                      | 0.2946 | 0.0095                       | 0.3889 |
|                                                                                   | H...H  | -0.0087                      | 0.2807 | 0.0093                       | 0.1989 |                                                                                     | CH...O | -0.0106                      | 0.2815 | 0.0119                       | 0.2689 |

**3.8 Table S21. NCI isosurfaces and electron densities features,  $\text{sign}(\lambda_2)\rho$  and reduced density gradient (RDG) on IEFPCM-MP2/6-311++G(2d,p) wavefunctions in  $\text{CCl}_4$  for the main conformers of compound G.**

| G1                                                                                |        |                              |        |                              |        | G2                                                                                  |        |                              |        |                              |        |
|-----------------------------------------------------------------------------------|--------|------------------------------|--------|------------------------------|--------|-------------------------------------------------------------------------------------|--------|------------------------------|--------|------------------------------|--------|
| 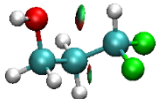 |        | $\text{sign}(\lambda_2)\rho$ | RDG    | $\text{sign}(\lambda_2)\rho$ | RDG    |  |        | $\text{sign}(\lambda_2)\rho$ | RDG    | $\text{sign}(\lambda_2)\rho$ | RDG    |
|                                                                                   | CH...F | -0.0094                      | 0.3878 | 0.0111                       | 0.3659 |                                                                                     | CH...F | -0.0086                      | 0.4718 | 0.0103                       | 0.4104 |
|                                                                                   | CH...O | -0.0102                      | 0.5095 | 0.0128                       | 0.4789 |                                                                                     | CH...O | -0.0098                      | 0.3505 | 0.0107                       | 0.3308 |
| G3                                                                                |        |                              |        |                              |        | G4                                                                                  |        |                              |        |                              |        |
|  |        | $\text{sign}(\lambda_2)\rho$ | RDG    | $\text{sign}(\lambda_2)\rho$ | RDG    |  |        | $\text{sign}(\lambda_2)\rho$ | RDG    | $\text{sign}(\lambda_2)\rho$ | RDG    |
|                                                                                   | CH...F | -0.0082                      | 0.5871 | 0.0117                       | 0.5507 |                                                                                     | OH...F | -0.0128                      | 0.4121 | 0.0121                       | 0.1394 |
| G5                                                                                |        |                              |        |                              |        | G6                                                                                  |        |                              |        |                              |        |
|  |        | $\text{sign}(\lambda_2)\rho$ | RDG    | $\text{sign}(\lambda_2)\rho$ | RDG    |  |        | $\text{sign}(\lambda_2)\rho$ | RDG    | $\text{sign}(\lambda_2)\rho$ | RDG    |
|                                                                                   | CH...F | -0.0091                      | 0.3737 | 0.0101                       | 0.3459 |                                                                                     | OH...F | -0.0132                      | 0.3355 | 0.0118                       | 0.2023 |
|                                                                                   | CH...F | -0.0091                      | 0.3737 | 0.0101                       | 0.3459 |                                                                                     | CH...F | -0.0096                      | 0.3962 | 0.0109                       | 0.3751 |

**3.9 Table S22. NCI isosurfaces and electron densities features,  $\text{sign}(\lambda_2)\rho$  and reduced density gradient (RDG) on IEFPCM-MP2/6-311++G(2d,p) wavefunctions in  $\text{CCl}_4$  for the main conformers of compound H.**

| H1                                                                                  |        |                              |        |                              |        | H2                                                                                    |        |                              |        |                              |        |
|-------------------------------------------------------------------------------------|--------|------------------------------|--------|------------------------------|--------|---------------------------------------------------------------------------------------|--------|------------------------------|--------|------------------------------|--------|
| 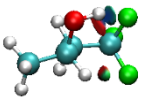 |        | $\text{sign}(\lambda_2)\rho$ | RDG    | $\text{sign}(\lambda_2)\rho$ | RDG    |  |        | $\text{sign}(\lambda_2)\rho$ | RDG    | $\text{sign}(\lambda_2)\rho$ | RDG    |
|                                                                                     | OH...F | -0.0142                      | 0.1790 | 0.0126                       | 0.2121 |                                                                                       | CF...O | -0.0107                      | 0.3356 | 0.0104                       | 0.3418 |
|                                                                                     | CH...F | -0.0086                      | 0.6183 | 0.0126                       | 0.1326 |                                                                                       | CH...F | -0.0101                      | 0.2742 | 0.0104                       | 0.1204 |

**3.10 Table S23. NCI isosurfaces and electron densities features,  $\text{sign}(\lambda_2)\rho$  and reduced density gradient (RDG) on IEFPCM-MP2/6-311++G(2d,p) wavefunctions in  $\text{CCl}_4$  for the main conformers of compound I.**

| I1                                                                                |        |                              |        | I2                           |        |                                                                                     |        |                              |        |                              |        |
|-----------------------------------------------------------------------------------|--------|------------------------------|--------|------------------------------|--------|-------------------------------------------------------------------------------------|--------|------------------------------|--------|------------------------------|--------|
| 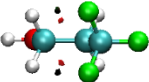 |        | $\text{sign}(\lambda_2)\rho$ | RDG    | $\text{sign}(\lambda_2)\rho$ | RDG    |  |        | $\text{sign}(\lambda_2)\rho$ | RDG    | $\text{sign}(\lambda_2)\rho$ | RDG    |
|                                                                                   | CH...F | -0.0082                      | 0.6511 | 0.0099                       | 0.4866 |                                                                                     | OH...F | -0.0136                      | 0.0614 | 0.0125                       | 0.3142 |
|                                                                                   | CH...F | -0.0082                      | 0.6511 | 0.0099                       | 0.4866 |                                                                                     | CH...F | -0.0093                      | 0.5321 | 0.0104                       | 0.4239 |

**4 Table S24: Calculated NMR coupling constants**

Experimental and theoretical values of coupling constants:

| syn_FPentOH<br><b>syn_A</b>       | exp<br>in CDCl <sub>3</sub> |       | theo<br>in CHCl <sub>3</sub> |       | anti_FPentOH<br><b>anti_A</b>      | exp<br>in CDCl <sub>3</sub> |       | theo<br>in CHCl <sub>3</sub> |       |
|-----------------------------------|-----------------------------|-------|------------------------------|-------|------------------------------------|-----------------------------|-------|------------------------------|-------|
|                                   | +25°C                       | -50°C | +25°C                        | -50°C |                                    | +25°C                       | -50°C | +25°C                        | -50°C |
| OH ... F                          | 6.6                         | 9.9   | -7.9                         | -11.9 | <b>OH ... F</b>                    | 1.9                         | 1.8   | -1.5                         | -1.2  |
| OH – H <sub>2</sub>               | 3.4                         | 2.4   | 3.4                          | 2.2   | OH – H <sub>2</sub>                | 4.9                         | 4.7   | 5.0                          | 4.5   |
| OH – Me                           | 0.3                         |       | 0.5                          | 0.7   | OH – H <sub>3</sub>                | 0.5                         | 0.7   | 0.6                          | 0.8   |
| H <sub>3</sub> – F                | 13.6                        | 11.8  | 10.8                         | 9.6   | H <sub>3</sub> – F                 | 15.7                        | 14.7  | 14.4                         | 13.8  |
| H <sub>3</sub> – H <sub>4</sub>   | 9.0                         | 9.9   | 9.3                          | 9.9   | H <sub>3</sub> – H <sub>4a</sub>   | 9.3                         | 9.9   | 9.1                          | 9.7   |
| H <sub>3</sub> – H <sub>2</sub>   | 7.9                         | 8.6   | 7.7                          | 8.2   | H <sub>3</sub> – H <sub>2g</sub>   | 3.0                         | 2.5   | 3.5                          | 2.6   |
| H <sub>3</sub> ' – F              | 34.7                        | 39.6  | 35.1                         | 38.8  | H <sub>3</sub> ' – F               | 36.0                        | 39.1  | 34.0                         | 36.4  |
| H <sub>3</sub> ' – H <sub>4</sub> | 4.1                         | 3.3   | 3.9                          | 3.4   | H <sub>3</sub> ' – H <sub>2a</sub> | 9.3                         | 10.0  | 9.2                          | 10.0  |
| H <sub>3</sub> ' – H <sub>2</sub> | 4.1                         | 3.3   | 4.2                          | 3.2   | H <sub>3</sub> ' – H <sub>4g</sub> | 2.7                         | 2.3   | 2.9                          | 2.2   |
| H <sub>3</sub> – H <sub>3</sub> ' | 14.5                        | 14.8  | -13.6                        | -13.8 | H <sub>4</sub> – F                 | 49.4                        | 49.7  | 50.3                         | 50.4  |
| H <sub>4</sub> – F                | 49.5                        | 49.8  | 50.7                         | 51.1  |                                    |                             |       |                              |       |

  

| FBuOH<br><b>B</b>                   | exp<br>in CDCl <sub>3</sub> |       | theo<br>in CHCl <sub>3</sub> |             | <b>B, cont'd</b>           | +25°C | -50°C | +25°C       | -50°C       |
|-------------------------------------|-----------------------------|-------|------------------------------|-------------|----------------------------|-------|-------|-------------|-------------|
|                                     | +25°C                       | -50°C | +25°C                        | -50°C       |                            | +25°C | -50°C | +25°C       | -50°C       |
| <b>OH ... F</b>                     | <b>2.2</b>                  |       | <b>-1.8</b>                  | <b>-2.4</b> | H <sub>3</sub> ' – F       | 29.3  |       | 29.2        | 32.2        |
| OH – H <sub>2</sub>                 | 4.5                         |       | 4.5                          | 4.0         | F – Me                     | 0.5   |       | 0.7         | 0.5         |
| OH – H <sub>3</sub> '               | 0.3                         |       | 0.0                          | 0.1         | F – H <sub>4</sub>         | 47.2  |       | 48.0        | 47.9        |
| H <sub>3</sub> – H <sub>3</sub> '   | 14.8                        |       | -13.7                        | -13.8       | F – H <sub>4</sub> '       | 47.2  |       | 48.2        | 48.2        |
| H <sub>3</sub> – H <sub>2</sub>     | 4.3                         |       | 4.2                          | 3.4         |                            |       |       |             |             |
| H <sub>3</sub> – H <sub>4</sub>     | 5.0                         |       | 5.2                          | 4.8         | <b>Me<sub>2</sub>FPrOH</b> |       |       |             |             |
| H <sub>3</sub> – H <sub>4</sub> '   | 7.5                         |       | 8.0                          | 8.5         | <b>C</b>                   |       |       |             |             |
| H <sub>3</sub> – F                  | 25.0                        |       | 22.7                         | 22.6        | OH ... F                   | 1.7   |       | <b>-1.2</b> | <b>-1.3</b> |
| H <sub>3</sub> ' – H <sub>2</sub>   | 8.1                         |       | 8.4                          | 9.2         | OH – H <sub>1</sub>        | 5.9   |       | 5.9         | 5.6         |
| H <sub>3</sub> ' – H <sub>4</sub>   | 6.0                         |       | 5.7                          | 5.4         | F – H <sub>1</sub>         | 1.3   |       | 2.3         | 2.4         |
| H <sub>3</sub> ' – H <sub>4</sub> ' | 4.6                         |       | 4.5                          | 3.9         | F – H <sub>3</sub>         | 47.8  |       | 39.8        | 42.5        |
|                                     |                             |       |                              |             | F – Me'                    | 1.8   |       | 1.4         | 1.5         |

| FPrOH<br><b>D</b>                 | exp<br>in CDCl <sub>3</sub> |       | theo<br>in CHCl <sub>3</sub> |       | F <sub>2</sub> PentOH<br><b>E</b>  | exp<br>in CDCl <sub>3</sub> |       | theo<br>in CHCl <sub>3</sub> |       |
|-----------------------------------|-----------------------------|-------|------------------------------|-------|------------------------------------|-----------------------------|-------|------------------------------|-------|
|                                   | +25°C                       | -50°C | +25°C                        | -50°C |                                    | +25°C                       | -50°C | +25°C                        | -50°C |
| OH ... F                          | 1.4                         | 1.7   | -1.2                         | -1.4  | OH ... F <sub>1</sub>              | 1.4                         | 1.7   | -1.2                         | -1.0  |
| H <sub>1</sub> - H <sub>2</sub>   | 6.0                         | 6.0   | 6.0                          | 5.8   | OH ... F <sub>2</sub>              | 3.5                         | 4.7   | -4.9                         | -5.9  |
| H <sub>1</sub> - OH               | 5.3                         | 5.2   | 5.5                          | 5.1   | OH - H <sub>2</sub>                | 3.5                         |       | 1.4                          | 1.2   |
| H <sub>2</sub> - F                | 27.0                        | 28.4  | 26.5                         | 27.5  | H <sub>3</sub> - H <sub>2</sub>    | 3.0                         | 2.4   | 1.2                          | 1.0   |
| H <sub>2</sub> - H <sub>3</sub>   | 5.8                         | 5.5   | 5.7                          | 5.5   | H <sub>3</sub> - H <sub>3</sub> '  | 15.0                        | 15.0  | -14.1                        | -14.1 |
| H <sub>3</sub> - F                | 47.0                        | 47.1  | 48.0                         | 48.0  | H <sub>3</sub> - F <sub>1</sub>    | 13.7                        | 13.7  | 14.0                         | 13.3  |
|                                   |                             |       |                              |       | H <sub>3</sub> - F <sub>2</sub>    | 20.0                        | 21.7  | 16.6                         | 17.6  |
|                                   |                             |       |                              |       | H <sub>3</sub> ' - H <sub>2</sub>  | 8.6                         | 9.2   | 9.7                          | 9.8   |
|                                   |                             |       |                              |       | H <sub>3</sub> ' - F <sub>2a</sub> | 19.3                        | 21.1  | 17.7                         | 17.2  |
|                                   |                             |       |                              |       | H <sub>3</sub> ' - F <sub>1g</sub> | 13.3                        | 11.6  | 13.4                         | 14.2  |
| F <sub>2</sub> BuOH<br><b>F</b>   | exp<br>in CDCl <sub>3</sub> |       | theo<br>in CHCl <sub>3</sub> |       | F <sub>2</sub> PrOH<br><b>G</b>    | exp<br>in CDCl <sub>3</sub> |       | theo<br>in CHCl <sub>3</sub> |       |
|                                   | +25°C                       | -50°C | +25°C                        | -50°C |                                    | +25°C                       | -50°C | +25°C                        | -50°C |
| OH ... F <sub>1</sub>             | 0.6                         |       | -0.2                         | -0.3  | OH ... F <sub>1</sub>              | 0.4                         |       | -0.3                         | -0.2  |
| OH ... F <sub>2</sub>             | 0.6                         |       | -0.4                         | -0.2  | OH ... F <sub>2</sub>              | 0.4                         |       | 0.1                          | 0.1   |
| OH - H <sub>2</sub>               | 4.5                         |       | 4.0                          | 3.6   | H <sub>1</sub> - OH                | 5.1                         |       | 4.2                          | 3.6   |
| H <sub>2</sub> - H <sub>3</sub>   | 8.4                         |       | 9.0                          | 9.9   | H <sub>1</sub> - H <sub>2</sub>    | 6.0                         |       | 6.2                          | 5.9   |
| H <sub>2</sub> - H <sub>3</sub> ' | 4.4                         |       | 3.6                          | 3.0   | H <sub>2</sub> - F <sub>1</sub>    | 17.0                        |       | 23.0                         | 23.8  |
| H <sub>3</sub> - H <sub>3</sub> ' | 14.5                        |       | -13.5                        | -13.4 | H <sub>2</sub> - F <sub>2</sub>    | 17.0                        |       | 10.0                         | 8.5   |
| F <sub>1</sub> - H <sub>3</sub>   | 14.5                        |       | 8.8                          | 6.3   | H <sub>2</sub> - H <sub>3</sub>    | 4.6                         |       | 4.8                          | 5.0   |
| F <sub>1</sub> - H <sub>3</sub> ' | 14.5                        |       | 11.1                         | 10.3  | H <sub>3</sub> - F <sub>1</sub>    | 57.0                        |       | 57.9                         | 58.2  |
| F <sub>2</sub> - H <sub>3</sub>   | 20.9                        |       | 30.1                         | 32.9  | H <sub>3</sub> - F <sub>2</sub>    | 57.0                        |       | 56.7                         | 56.8  |
| F <sub>2</sub> - H <sub>3</sub> ' | 16.3                        |       | 16.5                         | 15.2  |                                    |                             |       |                              |       |
| H <sub>4</sub> - H <sub>3</sub>   | 3.6                         |       | 2.3                          | 1.9   |                                    |                             |       |                              |       |
| H <sub>4</sub> - H <sub>3</sub> ' | 5.5                         |       | 7.3                          | 8.0   |                                    |                             |       |                              |       |
| H <sub>4</sub> - F <sub>1</sub>   | 56.8                        |       | 56.8                         | 57.0  |                                    |                             |       |                              |       |
| H <sub>4</sub> - F <sub>2</sub>   | 56.8                        |       | 58.1                         | 58.4  |                                    |                             |       |                              |       |

| F <sub>3</sub> BuOH<br>H          | exp<br>in CDCl <sub>3</sub> |       | theo<br>in CHCl <sub>3</sub> |       | F <sub>3</sub> PrOH<br>I | exp<br>in CDCl <sub>3</sub> |       | theo<br>in CHCl <sub>3</sub> |       |
|-----------------------------------|-----------------------------|-------|------------------------------|-------|--------------------------|-----------------------------|-------|------------------------------|-------|
|                                   | +25°C                       | -50°C | +25°C                        | -50°C |                          | +25°C                       | -50°C | +25°C                        | -50°C |
| OH ... F <sub>1</sub>             | 0.7                         |       | -4.5                         | -5.8  | OH ... F <sub>1</sub>    | 0.3                         |       | 1.3                          | 1.3   |
| OH ... F <sub>2</sub>             | 0.7                         |       | 0.2                          | 0.3   | OH ... F <sub>2</sub>    | 0.3                         |       | 0.0                          | 0.0   |
| OH ... F <sub>3</sub>             | 0.7                         |       | 0.4                          | 0.3   | OH ... F <sub>3</sub>    | 0.3                         |       | -1.5                         | -1.9  |
| OH - H <sub>2</sub>               | 4.2                         |       | 3.7                          | 3.0   | F - H <sub>2</sub>       | 10.8                        |       | 9.9                          | 9.9   |
| H <sub>2</sub> - H <sub>3</sub>   | 4.0                         |       | 2.2                          | 1.7   | OH - H <sub>1</sub>      | 5.8                         |       | 5.0                          | 5.0   |
| H <sub>2</sub> - H <sub>3</sub> ' | 8.0                         |       | 9.5                          | 9.7   |                          |                             |       |                              |       |
| H <sub>3</sub> - F                | 11.2                        |       | 10.6                         | 10.7  |                          |                             |       |                              |       |
| H <sub>3</sub> ' - F              | 10.8                        |       | 9.5                          | 9.6   |                          |                             |       |                              |       |

---

## SUPPORTING INFORMATION 2

### NMR investigations of the fluorohydrins A-I

---

#### Table of Contents

|                                                                                                                                                                    |           |
|--------------------------------------------------------------------------------------------------------------------------------------------------------------------|-----------|
| <b>5 Detailed NMR analysis of all fluorohydrins.....</b>                                                                                                           | <b>38</b> |
| <b>5.1 Experimental procedure for spectra acquisition and FID reprocessing .....</b>                                                                               | <b>38</b> |
| <b>5.2 (±)-<i>syn</i>-4-Fluoropentan-2-ol (<i>syn</i>-A) .....</b>                                                                                                 | <b>39</b> |
| 5.2.1 <sup>1</sup> H NMR spectrum (CDCl <sub>3</sub> , 500 MHz, 25 °C).....                                                                                        | 39        |
| 5.2.2 Detail of <sup>1</sup> H and <sup>1</sup> H[ <sup>19</sup> F] NMR of OH, H-3 and H-3' signals (CDCl <sub>3</sub> , 500 MHz, 25 °C) ( <i>syn</i> -A).....     | 40        |
| 5.2.3 Comparison of <sup>1</sup> H NMR of OH, H-3 and H-3' signals at 25 °C and -50 °C (CDCl <sub>3</sub> , 500 MHz) ( <i>syn</i> -A).....                         | 41        |
| 5.2.4 Detail of <sup>1</sup> H and <sup>1</sup> H[ <sup>19</sup> F] NMR of OH, H-3 and H-3' signals at -50 °C (CDCl <sub>3</sub> , 500 MHz) ( <i>syn</i> -A) ..... | 42        |
| 5.2.5 <sup>19</sup> F NMR spectrum (CDCl <sub>3</sub> , 470 MHz, 25 °C) ( <i>syn</i> -A).....                                                                      | 43        |
| 5.2.6 <sup>19</sup> F NMR spectrum (CDCl <sub>3</sub> , 470 MHz, -50 °C) ( <i>syn</i> -A) .....                                                                    | 44        |
| <b>5.3 (±)-<i>anti</i>-4-fluoropentan-2-ol (<i>anti</i>-A).....</b>                                                                                                | <b>45</b> |
| 5.3.1 <sup>1</sup> H NMR spectrum (CDCl <sub>3</sub> , 500 MHz, 25 °C).....                                                                                        | 45        |
| 5.3.2 Detail of <sup>1</sup> H and <sup>1</sup> H[ <sup>19</sup> F] NMR of OH, H-3 and H-3' signals (CDCl <sub>3</sub> , 500 MHz, 25 °C) ( <i>anti</i> -A) .....   | 46        |
| 5.3.3 Comparison of <sup>1</sup> H NMR of OH, H-3 and H-3' signals at 25 °C and -50 °C (CDCl <sub>3</sub> , 500 MHz) ( <i>anti</i> -A) .....                       | 47        |
| 5.3.4 Detail of <sup>1</sup> H and <sup>1</sup> H[ <sup>19</sup> F] NMR of OH, H-3 and H-3' signals at -50 °C (CDCl <sub>3</sub> , 500 MHz) ( <i>anti</i> -A)..... | 48        |
| 5.3.5 <sup>19</sup> F NMR spectrum (CDCl <sub>3</sub> , 470 MHz, 25 °C) ( <i>anti</i> -A) .....                                                                    | 49        |
| 5.3.6 <sup>19</sup> F NMR spectrum (CDCl <sub>3</sub> , 470 MHz, -50 °C) ( <i>anti</i> -A).....                                                                    | 50        |
| <b>5.4 4-fluorobutan-2-ol (B) .....</b>                                                                                                                            | <b>51</b> |
| 5.4.1 <sup>1</sup> H NMR spectrum (CDCl <sub>3</sub> , 500 MHz, 25 °C).....                                                                                        | 51        |
| 5.4.2 Detail of <sup>1</sup> H and <sup>1</sup> H[ <sup>19</sup> F] NMR of OH, H-3 and H-3' signals (CDCl <sub>3</sub> , 500 MHz, 25 °C) (B) .....                 | 52        |
| 5.4.3 <sup>19</sup> F NMR spectrum (CDCl <sub>3</sub> , 470 MHz, 25 °C) (B) .....                                                                                  | 53        |
| <b>5.5 3-fluoro-2,2-dimethylpropan-1-ol (C).....</b>                                                                                                               | <b>54</b> |
| 5.5.1 <sup>1</sup> H NMR spectrum (CDCl <sub>3</sub> , 500 MHz, 25 °C).....                                                                                        | 54        |
| 5.5.2 Detail of <sup>1</sup> H and <sup>1</sup> H[ <sup>19</sup> F] NMR of OH signal (CDCl <sub>3</sub> , 500 MHz, 25 °C) (C).....                                 | 55        |



|             |                                                                                                                                                      |           |
|-------------|------------------------------------------------------------------------------------------------------------------------------------------------------|-----------|
| 5.5.3       | $^{19}\text{F}$ NMR spectrum ( $\text{CDCl}_3$ , 470 MHz, 25 °C) (C) .....                                                                           | 56        |
| <b>5.6</b>  | <b>3-fluoropropan-1-ol (D)</b> .....                                                                                                                 | <b>57</b> |
| 5.6.1       | $^1\text{H}$ NMR spectrum ( $\text{CDCl}_3$ , 500 MHz, 25 °C) .....                                                                                  | 57        |
| 5.6.2       | Detail of $^1\text{H}$ and $^1\text{H}[^{19}\text{F}]$ NMR of OH signal ( $\text{CDCl}_3$ , 500 MHz, 25 °C) (D) .....                                | 58        |
| 5.6.3       | Comparison of $^1\text{H}$ NMR of OH signal at 25 °C and -50 °C ( $\text{CDCl}_3$ , 500 MHz) (D) .....                                               | 59        |
| 5.6.4       | Detail of $^1\text{H}$ and $^1\text{H}[^{19}\text{F}]$ NMR of OH signals at -50 °C ( $\text{CDCl}_3$ , 500 MHz) (D) .....                            | 60        |
| 5.6.5       | $^{19}\text{F}$ NMR spectrum ( $\text{CDCl}_3$ , 470 MHz, 25 °C) (D) .....                                                                           | 61        |
| 5.6.6       | $^{19}\text{F}$ NMR spectrum ( $\text{CDCl}_3$ , 470 MHz, -50 °C) (D) .....                                                                          | 62        |
| 5.6.7       | $^1\text{H}$ NMR spectrum ( $\text{CD}_2\text{Cl}_2$ , 500 MHz, 25 °C) (D) .....                                                                     | 63        |
| 5.6.8       | Detail of $^1\text{H}$ and $^1\text{H}[^{19}\text{F}]$ NMR of OH signal ( $\text{CD}_2\text{Cl}_2$ , 500 MHz, 25 °C) (D) .....                       | 64        |
| 5.6.9       | $^{19}\text{F}$ NMR spectrum ( $\text{CD}_2\text{Cl}_2$ , 470 MHz, 25 °C) (D) .....                                                                  | 65        |
| <b>5.7</b>  | <b>4,4-difluoropentan-2-ol (E)</b> .....                                                                                                             | <b>66</b> |
| 5.7.1       | $^1\text{H}$ NMR spectrum ( $\text{CDCl}_3$ , 500 MHz, 25 °C) .....                                                                                  | 66        |
| 5.7.2       | Detail of $^1\text{H}$ and $^1\text{H}[^{19}\text{F}]$ NMR of OH, H-3 and H-3' signals ( $\text{CDCl}_3$ , 500 MHz, 25 °C) (E) .....                 | 67        |
| 5.7.3       | Homodecoupling of H-2 ( $\text{CDCl}_3$ , 500 MHz, 25 °C) (E) .....                                                                                  | 68        |
| 5.7.4       | Comparison of $^1\text{H}$ NMR of OH, H-3' and H-3 signal at 25 °C and -50 °C ( $\text{CDCl}_3$ , 500 MHz) (E) .....                                 | 69        |
| 5.7.5       | Detail of $^1\text{H}$ and $^1\text{H}[^{19}\text{F}]$ NMR of OH, H-3' and H-3 signals at -50 °C ( $\text{CDCl}_3$ , 500 MHz) (E) .....              | 70        |
| 5.7.6       | Homodecoupling of H-2 ( $\text{CDCl}_3$ , 500 MHz, -50 °C) (E) .....                                                                                 | 71        |
| 5.7.7       | $^{19}\text{F}$ NMR spectrum ( $\text{CDCl}_3$ , 470 MHz, 25 °C) (E) .....                                                                           | 72        |
| 5.7.8       | $^{19}\text{F}$ NMR spectrum ( $\text{CDCl}_3$ , 470 MHz, -50 °C) (E) .....                                                                          | 73        |
| <b>5.8</b>  | <b>4,4-difluorobutan-2-ol (F)</b> .....                                                                                                              | <b>74</b> |
| 5.8.1       | $^1\text{H}$ NMR spectrum ( $\text{CDCl}_3$ , 500 MHz, 25 °C) .....                                                                                  | 74        |
| 5.8.2       | Detail of $^1\text{H}$ and $^1\text{H}[^{19}\text{F}]$ NMR of OH, H-3 and H-3' signals ( $\text{CDCl}_3$ , 500 MHz, 25 °C) (F) .....                 | 75        |
| 5.8.3       | Detail of $^1\text{H}$ and $^1\text{H}[^{19}\text{F}]$ NMR of OH signal ( $\text{CDCl}_3$ , 500 MHz, 25 °C) (F) .....                                | 76        |
| 5.8.4       | $^{19}\text{F}$ NMR spectrum ( $\text{CDCl}_3$ , 470 MHz, 25 °C) (F) .....                                                                           | 77        |
| <b>5.9</b>  | <b>3,3-difluoropropan-1-ol (G)</b> .....                                                                                                             | <b>78</b> |
| 5.9.1       | $^1\text{H}$ NMR spectrum ( $\text{CDCl}_3$ , 500 MHz, 25 °C) .....                                                                                  | 78        |
| 5.9.2       | Detail of $^1\text{H}$ and $^1\text{H}[^{19}\text{F}]$ NMR of OH signal ( $\text{CDCl}_3$ , 500 MHz, 25 °C) (G) .....                                | 79        |
| 5.9.3       | Detail of $^1\text{H}$ (enhanced resolution spectra) and $^1\text{H}[^{19}\text{F}]$ NMR of OH signal ( $\text{CDCl}_3$ , 500 MHz, 25 °C) (G) .....  | 80        |
| 5.9.4       | $^{19}\text{F}$ NMR spectrum ( $\text{CDCl}_3$ , 470 MHz, 25 °C) (G) .....                                                                           | 81        |
| <b>5.10</b> | <b>4,4,4-trifluorobutan-2-ol (H)</b> .....                                                                                                           | <b>82</b> |
| 5.10.1      | $^1\text{H}$ NMR spectrum ( $\text{CDCl}_3$ , 500 MHz, 25 °C) .....                                                                                  | 82        |
| 5.10.2      | Detail of $^1\text{H}$ and $^1\text{H}[^{19}\text{F}]$ NMR of OH, H-3 and H-3' signals ( $\text{CDCl}_3$ , 500 MHz, 25 °C) (H) .....                 | 83        |
| 5.10.3      | Detail of enhanced resolution spectra of $^1\text{H}$ and $^1\text{H}[^{19}\text{F}]$ NMR of OH signal ( $\text{CDCl}_3$ , 500 MHz, 25 °C) (H) ..... | 84        |
| 5.10.4      | $^{19}\text{F}$ NMR spectrum ( $\text{CDCl}_3$ , 470 MHz, 25 °C) (H) .....                                                                           | 85        |
| <b>5.11</b> | <b>3,3,3-trifluoropropan-1-ol (I)</b> .....                                                                                                          | <b>86</b> |
| 5.11.1      | $^1\text{H}$ NMR spectrum ( $\text{CDCl}_3$ , 500 MHz, 25 °C) .....                                                                                  | 86        |
| 5.11.2      | Detail of $^1\text{H}$ and $^1\text{H}[^{19}\text{F}]$ NMR of OH signal ( $\text{CDCl}_3$ , 500 MHz, 25 °C) (I) .....                                | 87        |

---

|        |                                                                                                                                                     |    |
|--------|-----------------------------------------------------------------------------------------------------------------------------------------------------|----|
| 5.11.3 | Detail of $^1\text{H}$ (enhanced resolution spectra) and $^1\text{H}[^{19}\text{F}]$ NMR of OH signal ( $\text{CDCl}_3$ , 500 MHz, 25 °C) (I) ..... | 88 |
| 5.11.4 | $^{19}\text{F}$ NMR spectrum ( $\text{CDCl}_3$ , 470 MHz, 25 °C) (I).....                                                                           | 89 |

## 5 Detailed NMR analysis of all fluorohydrins

### 5.1 Experimental procedure for sample preparation, spectra acquisition and FID reprocessing

Molecular sieves 3Å (2g, beads 4-8 mesh) were activated by heating at 160 °C under reduced pressure (0.15 mmHg) for 16 hours. After cooling, the activated molecular sieves (3 spatulas) were placed under argon atmosphere and then added to a dry solution of fluorohydrin (**A-I**) in CDCl<sub>3</sub> (1.2 mg/mL, (0.009M-0.015M)). The resulting solution was left standing for 40 minutes under argon and then 0.6 mL of the supernatant solution was added to the NMR tube which was previously flame-dried under reduced pressure and placed under argon. The NMR tube was closed with a valve and immediately submitted for data acquisition.

NMR data were collected on a Bruker AVIII HD 500 MHz NMR spectrometer. Samples were shimmed until  $w_{1/2}$  for residual CDCl<sub>3</sub> solvent signal was 0.5 Hz or better through a combination of sequential iterations of "TopShim" gradient shimming with additional manual intervention as required. <sup>1</sup>H spectra were collected with TD = 131,072 points (zero-filled to 262,144) and SW = 14 ppm (o1p = 5.0 ppm). <sup>19</sup>F spectra were collected with TD = 262,144 points (zero-filled to 524,288) and SW = 50 ppm (o1p proximal to <sup>19</sup>F signal). <sup>19</sup>F(<sup>1</sup>H) spectra were collected with TD = 262,144 points (zero-filled to 524,288) and SW = 200 ppm (o1p proximal to <sup>19</sup>F signal; inverse-gated decoupling with o2p = 5.0 ppm). <sup>1</sup>H(<sup>19</sup>F) spectra were collected with TD = 65,536 points (zero-filled to 196,608) and SW = 14 ppm (o1p = 5.0 ppm; adiabatic inverse-gated decoupling with o2p proximal to <sup>19</sup>F signal).

5.2 ( $\pm$ )-*syn*-4-Fluoropentan-2-ol (*syn*-A)5.2.1  $^1\text{H}$  NMR spectrum ( $\text{CDCl}_3$ , 500 MHz, 25  $^\circ\text{C}$ )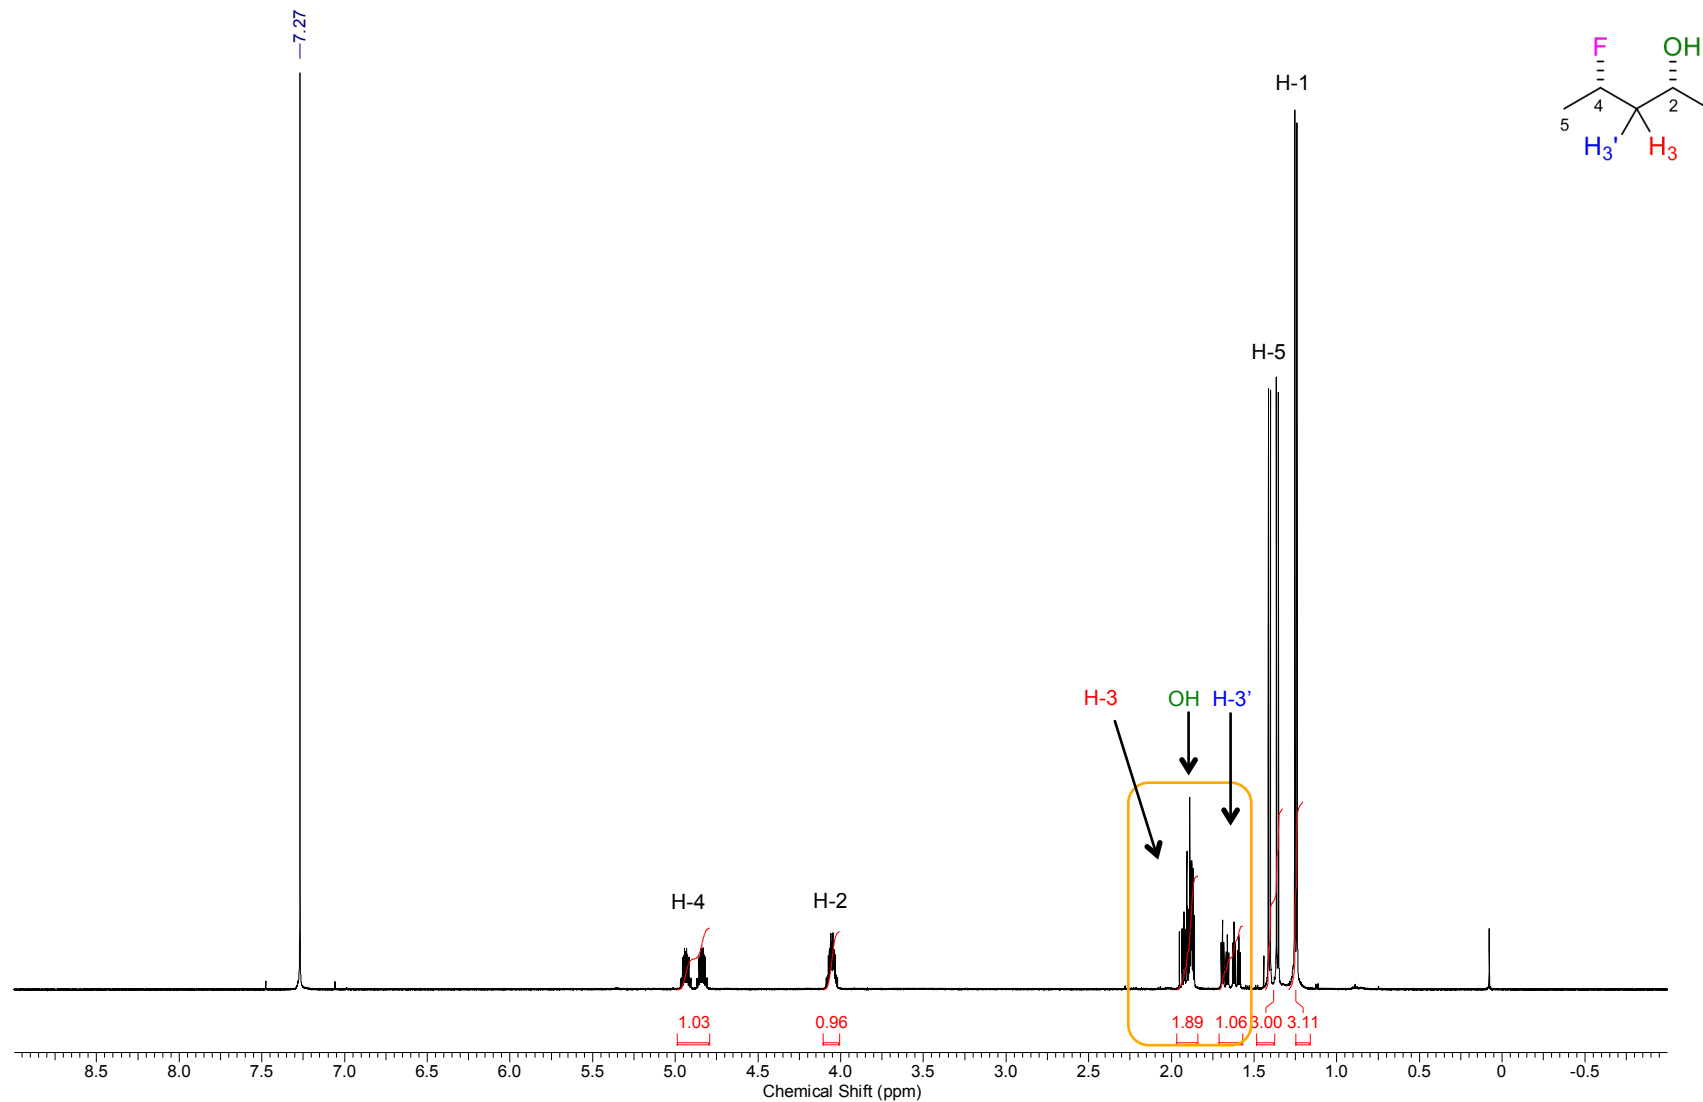

5.2.2 Detail of  $^1\text{H}$  and  $^1\text{H}[^{19}\text{F}]$  NMR of OH, H-3 and H-3' signals ( $\text{CDCl}_3$ , 500 MHz, 25 °C) (*syn-A*) $^1\text{H}[^{19}\text{F}]$  NMR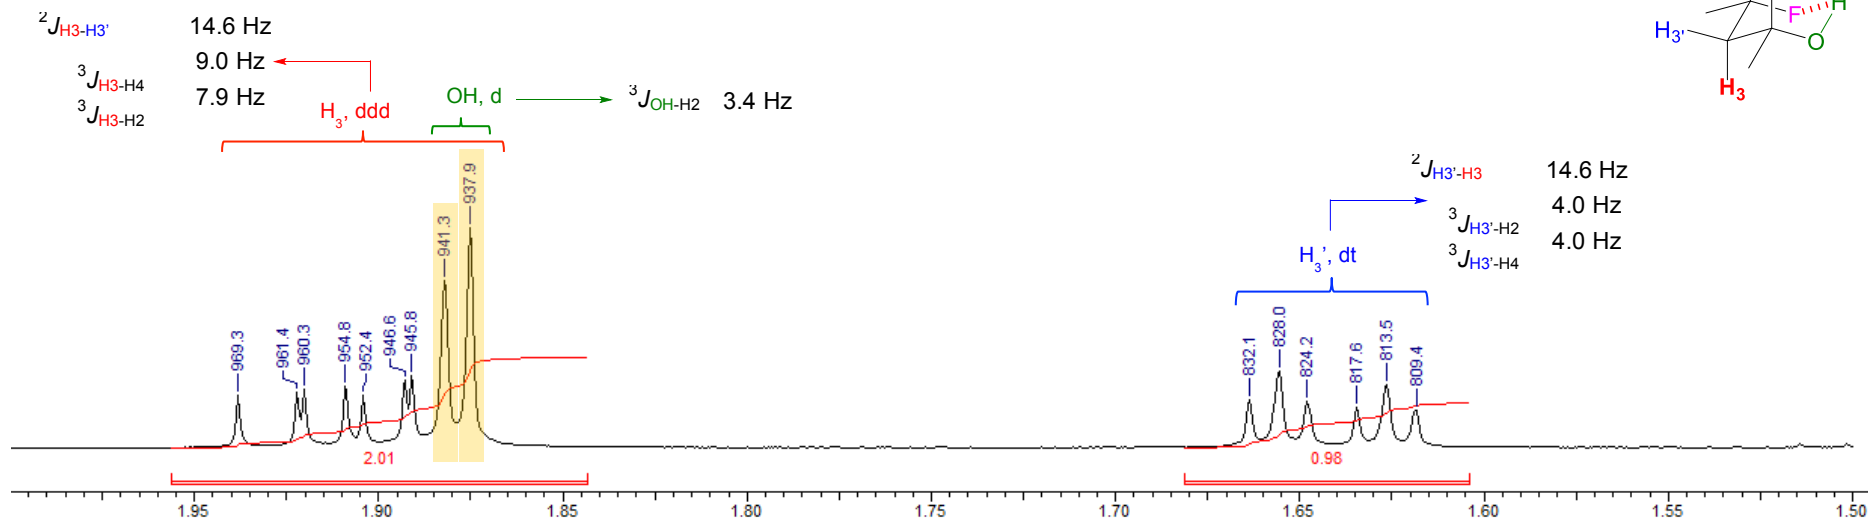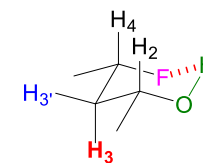 $^1\text{H}$  NMR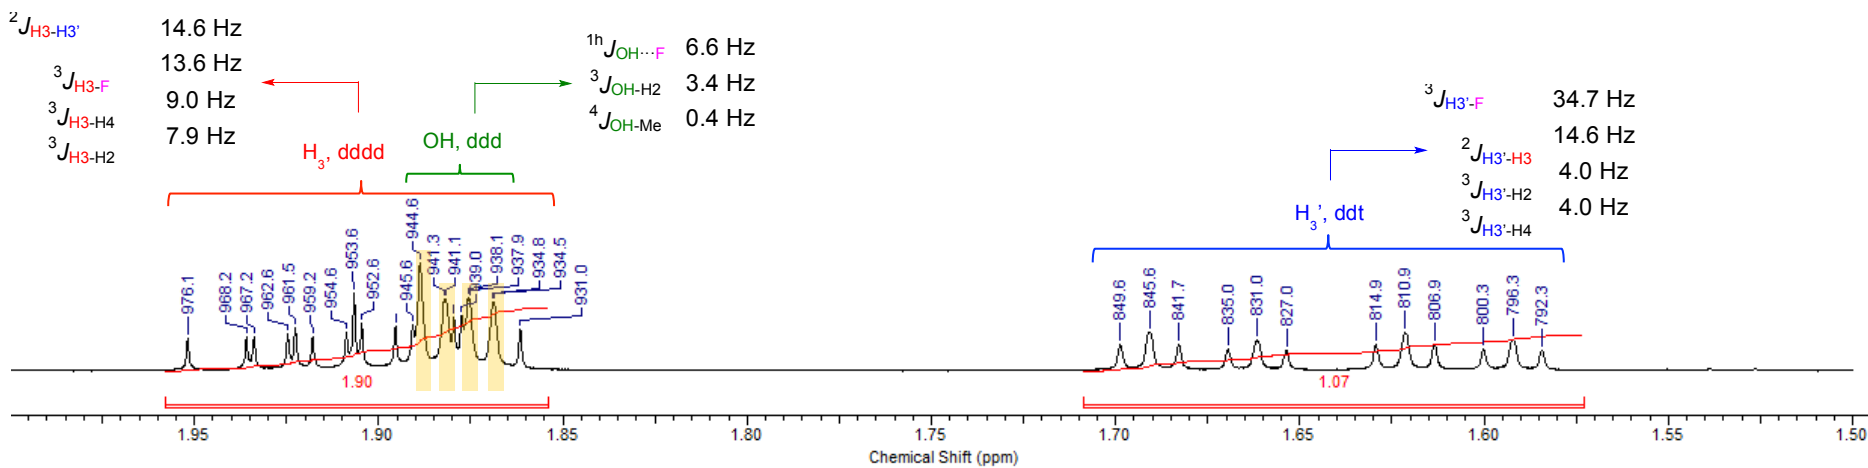

5.2.3 Comparison of  $^1\text{H}$  NMR of OH, H-3 and H-3' signals at 25 °C and -50 °C ( $\text{CDCl}_3$ , 500 MHz) (*syn-A*) $^1\text{H}$  NMR -50 °C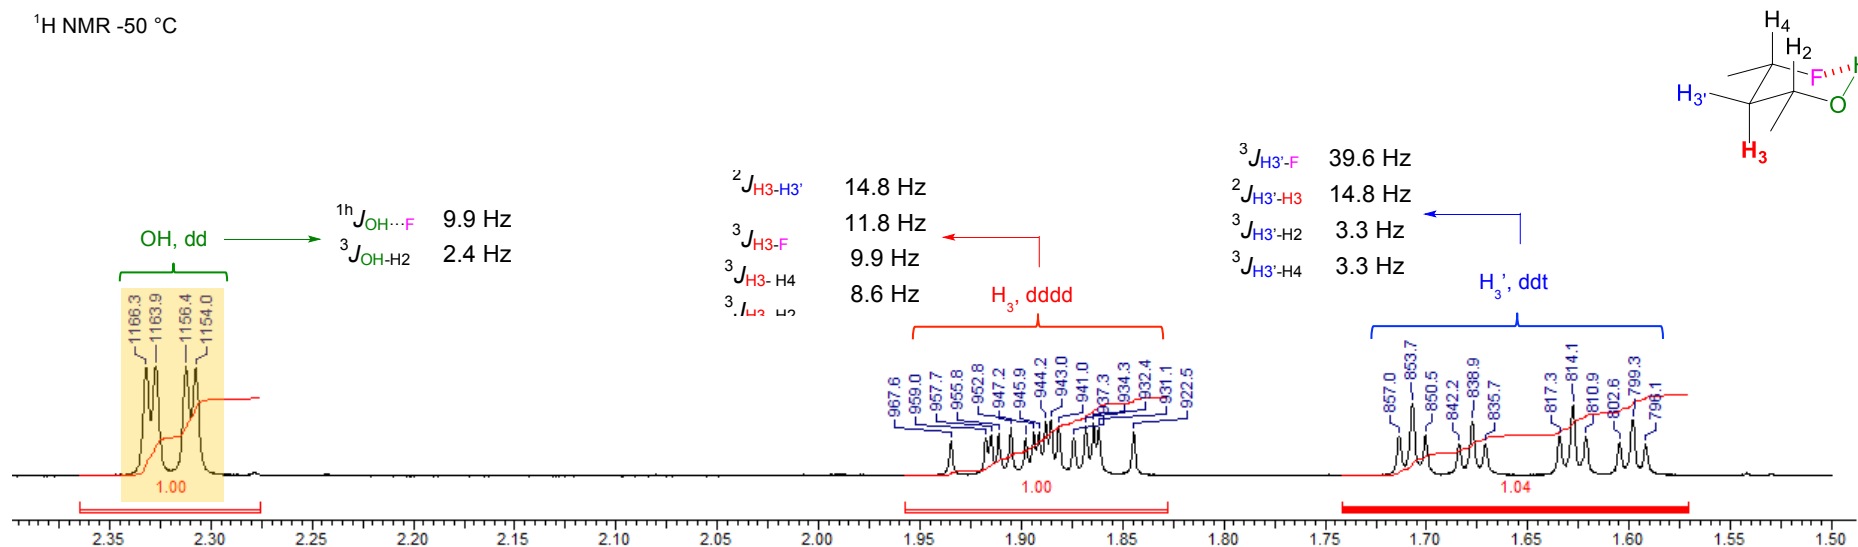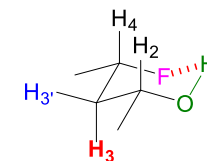 $^1\text{H}$  NMR, 25 °C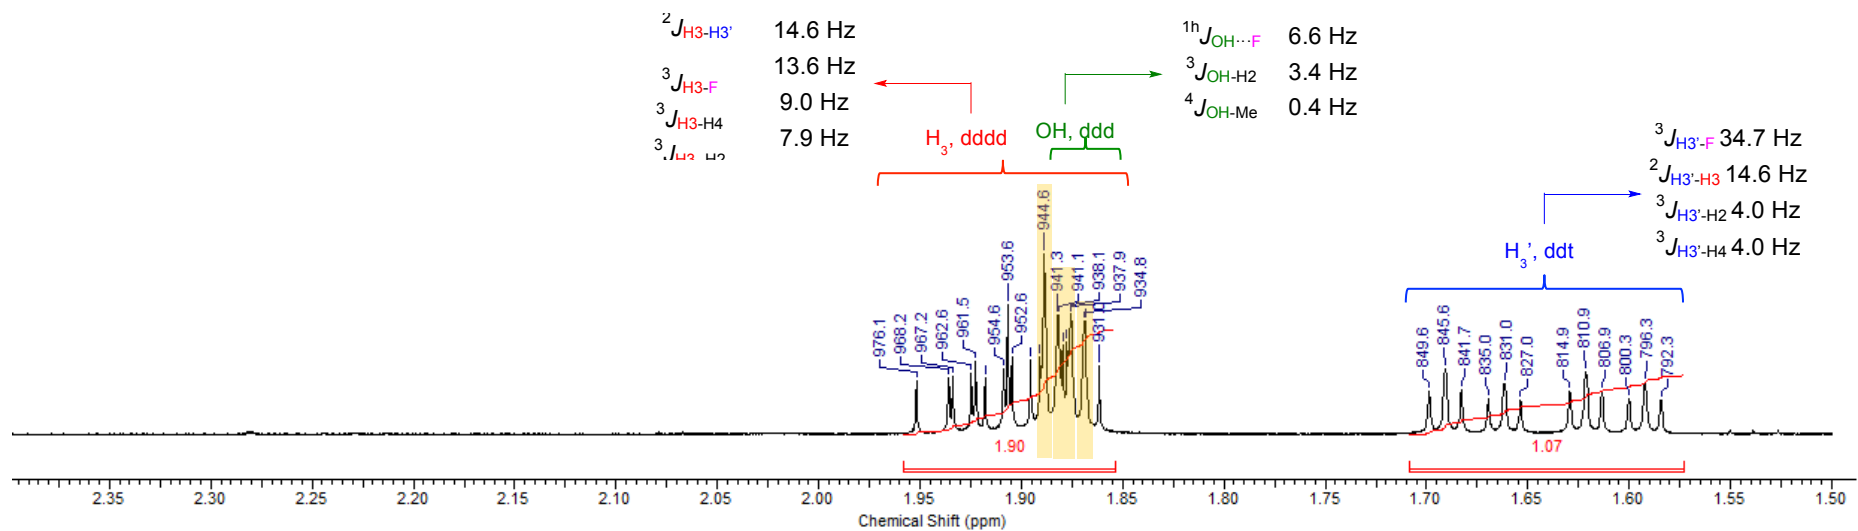

5.2.4 Detail of  $^1\text{H}$  and  $^1\text{H}[^{19}\text{F}]$  NMR of OH, H-3 and H-3' signals at  $-50\text{ }^\circ\text{C}$  ( $\text{CDCl}_3$ , 500 MHz) (*syn-A*) $^1\text{H}[^{19}\text{F}]$  NMR,  $-50\text{ }^\circ\text{C}$ 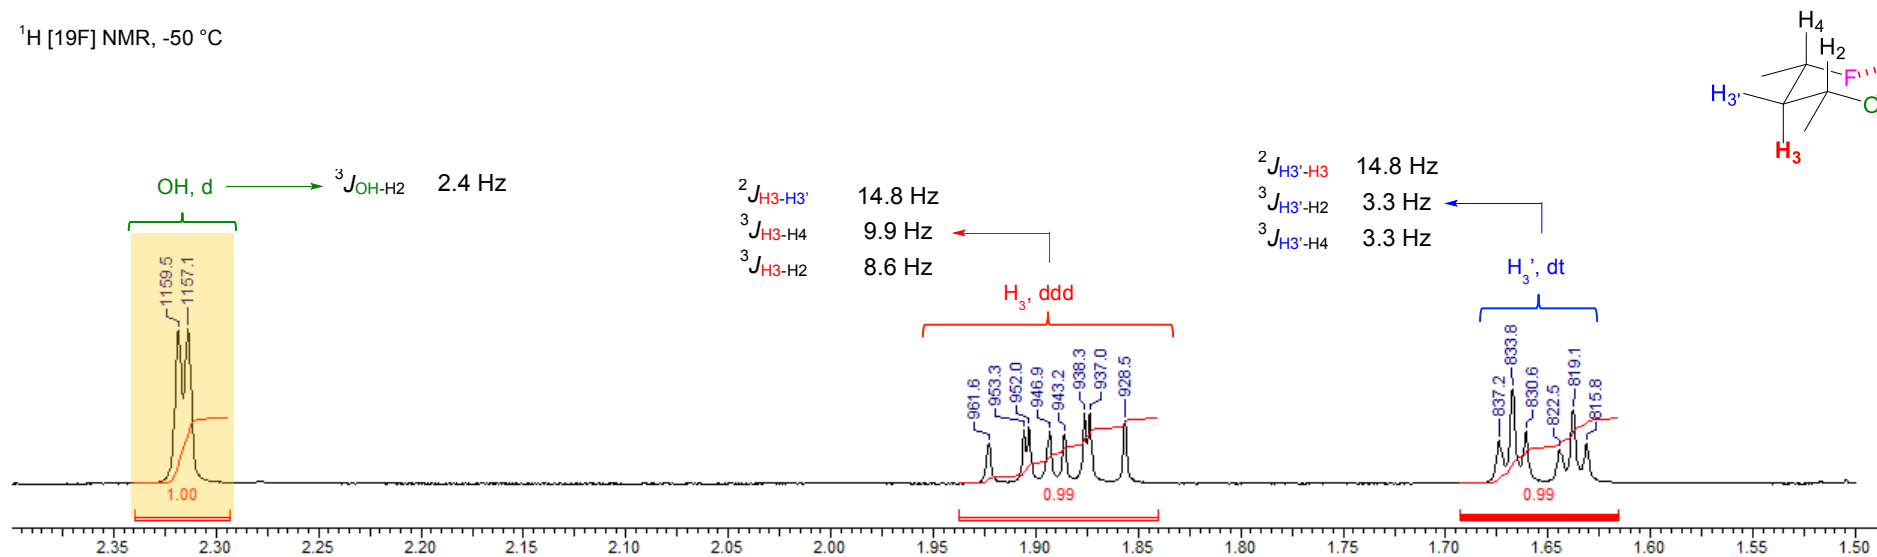 $^1\text{H}$  NMR,  $-50\text{ }^\circ\text{C}$ 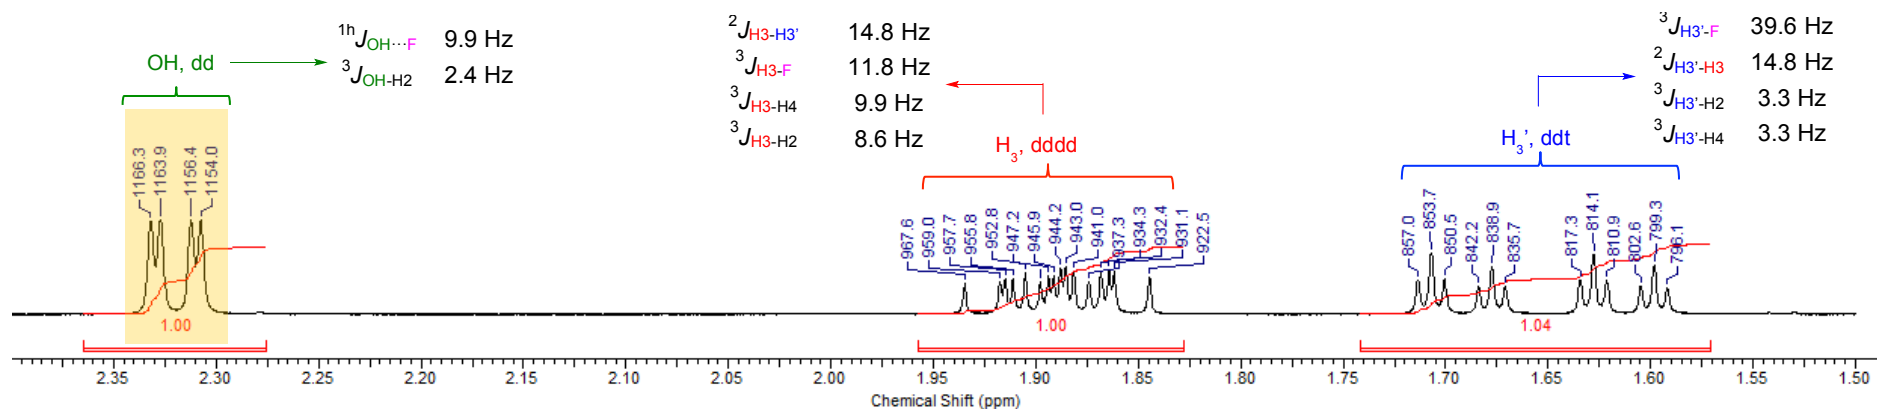

5.2.5  $^{19}\text{F}$  NMR spectrum ( $\text{CDCl}_3$ , 470 MHz, 25 °C) (*syn-A*)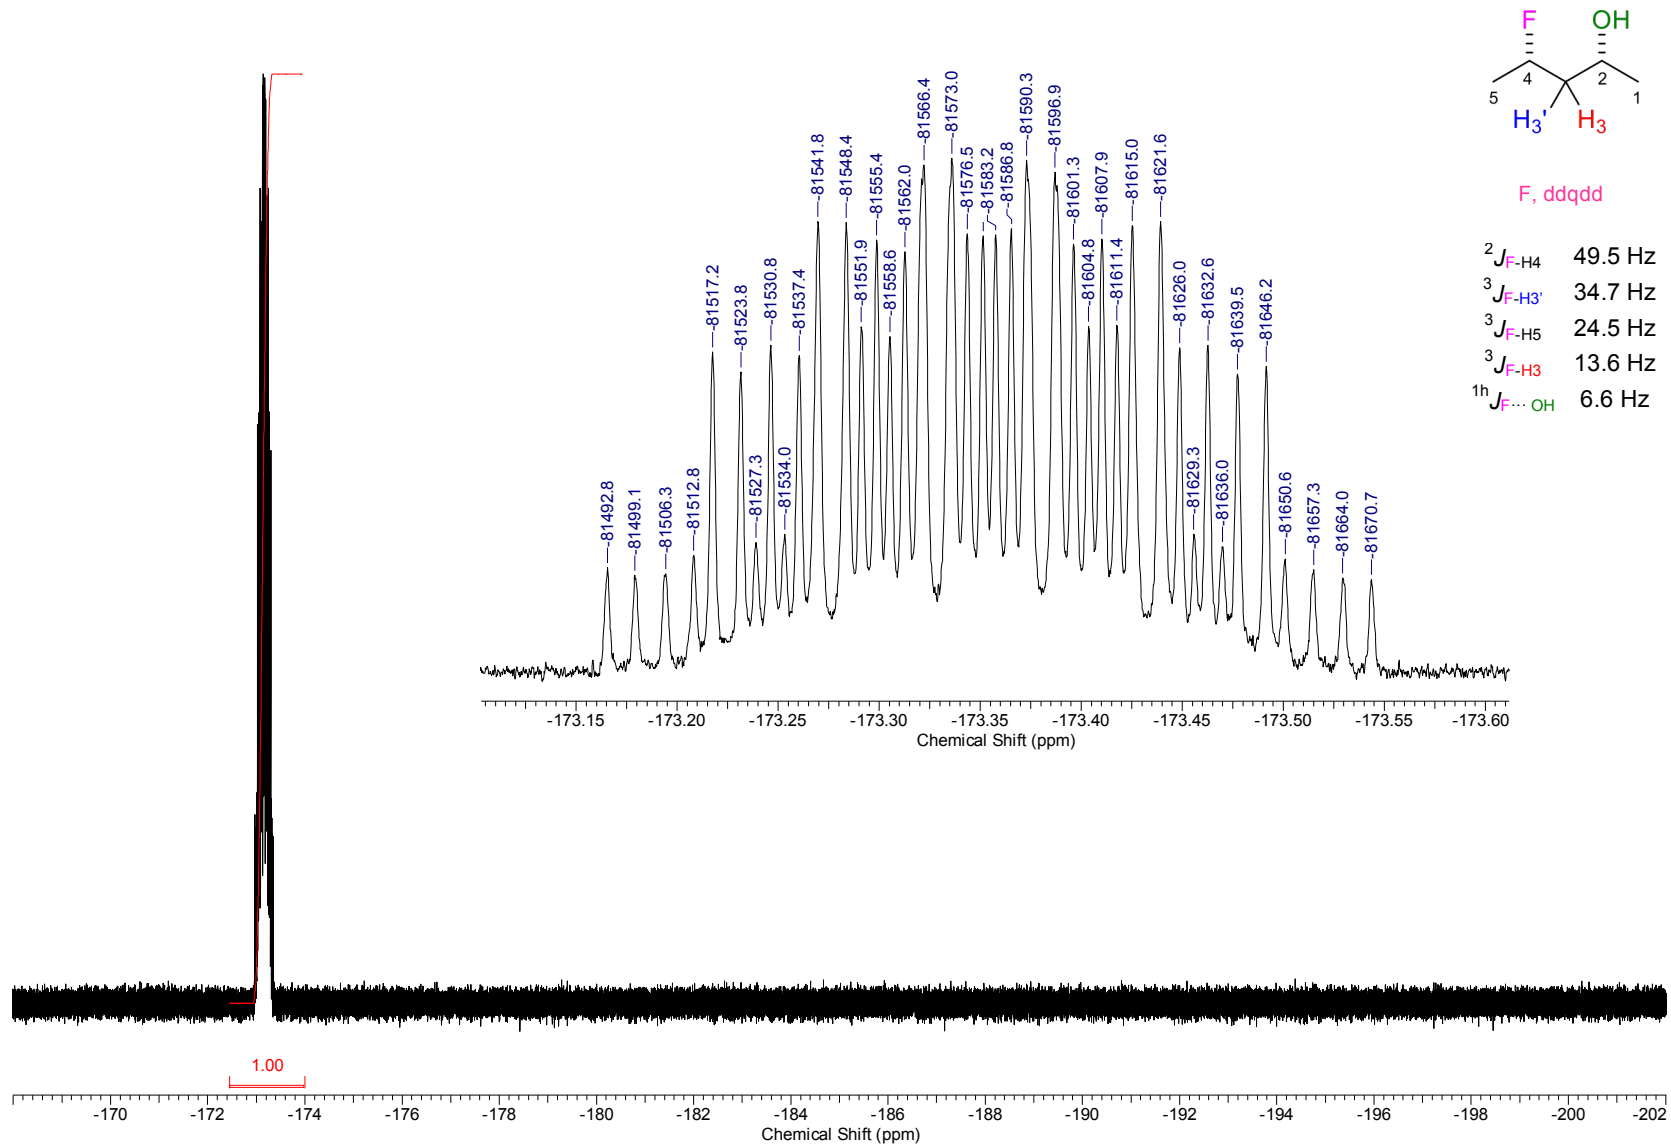



5.2.6  $^{19}\text{F}$  NMR spectrum ( $\text{CDCl}_3$ , 470 MHz,  $-50\text{ }^\circ\text{C}$ ) (*syn-A*)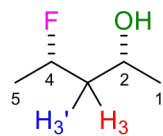

F, ddqdd

|                                  |         |
|----------------------------------|---------|
| $^2J_{\text{F-H4}}$              | 49.8 Hz |
| $^3J_{\text{F-H3'}}$             | 39.6 Hz |
| $^3J_{\text{F-H5}}$              | 25.2 Hz |
| $^3J_{\text{F-H3}}$              | 11.8 Hz |
| $^1hJ_{\text{F}\cdots\text{OH}}$ | 9.9 Hz  |

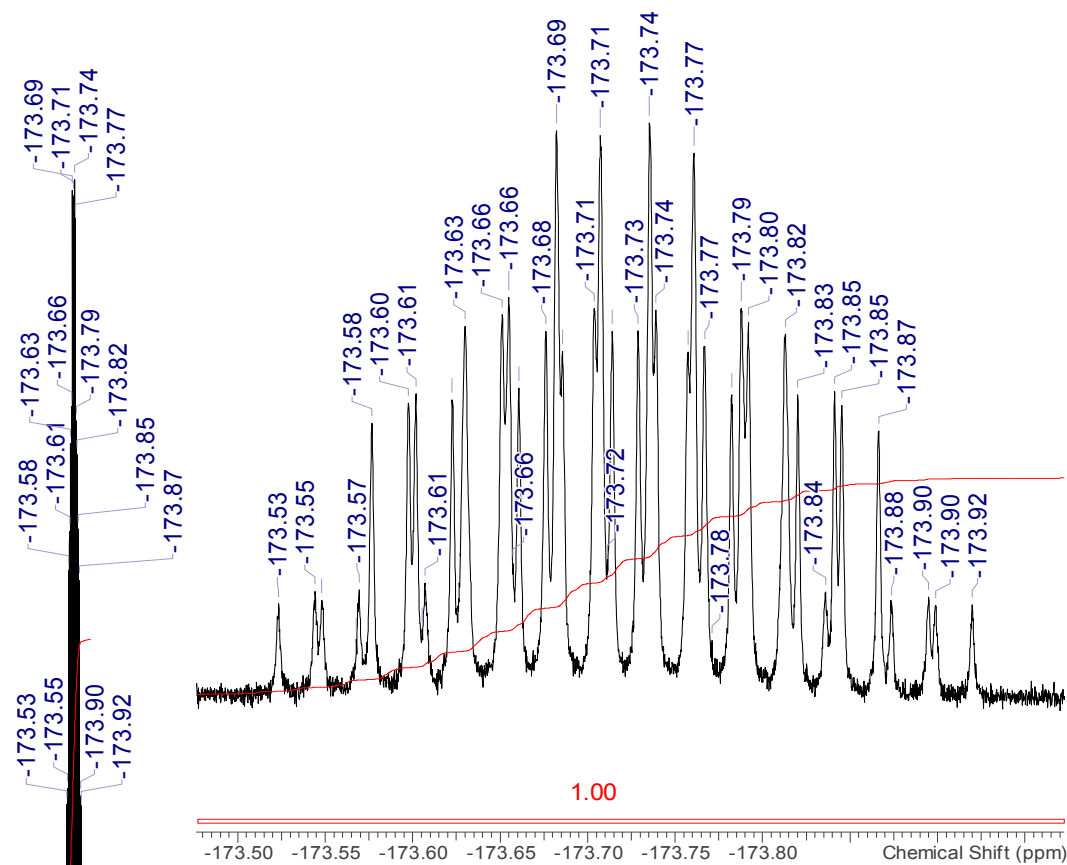

1.00

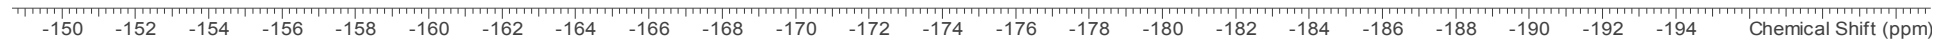

5.3 ( $\pm$ )-*anti*-4-fluoropentan-2-ol (*anti*-A)5.3.1  $^1\text{H}$  NMR spectrum ( $\text{CDCl}_3$ , 500 MHz, 25  $^\circ\text{C}$ )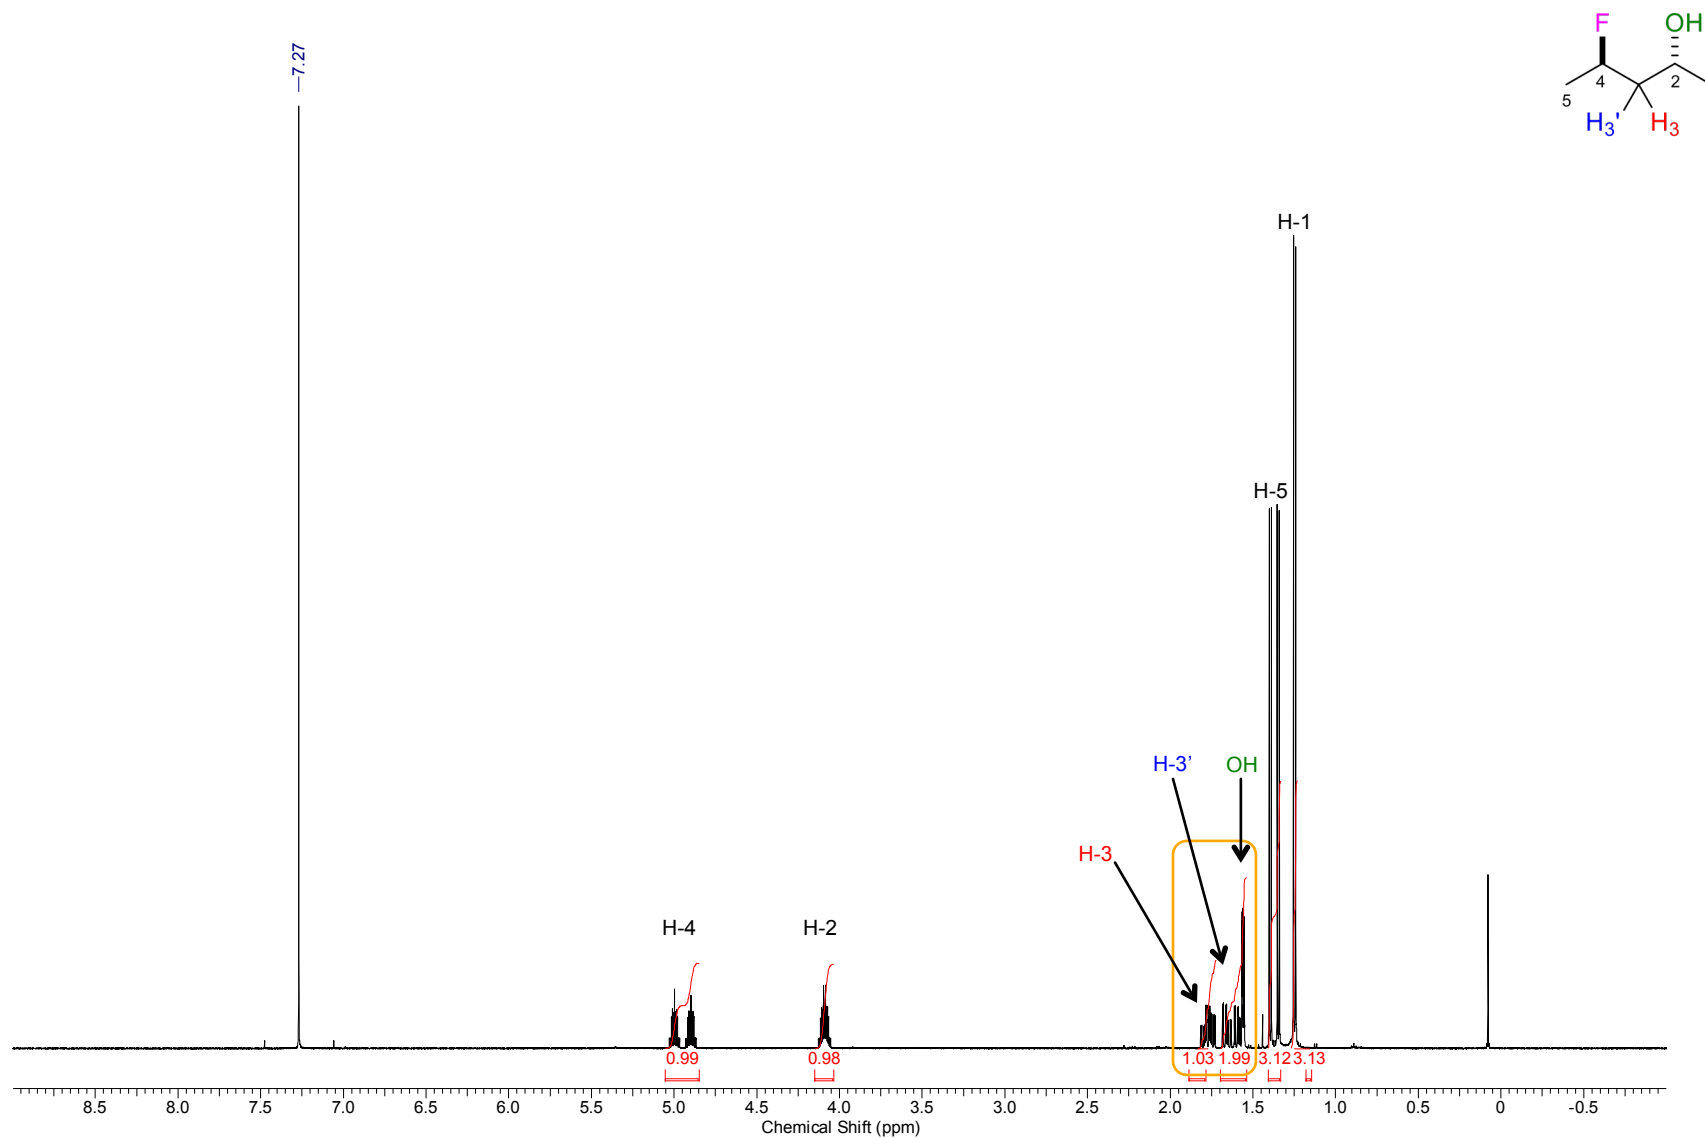

5.3.2 Detail of  $^1\text{H}$  and  $^1\text{H}[^{19}\text{F}]$  NMR of OH, H-3 and H-3' signals ( $\text{CDCl}_3$ , 500 MHz, 25 °C) (*anti*-A) $^1\text{H}[^{19}\text{F}]$  NMR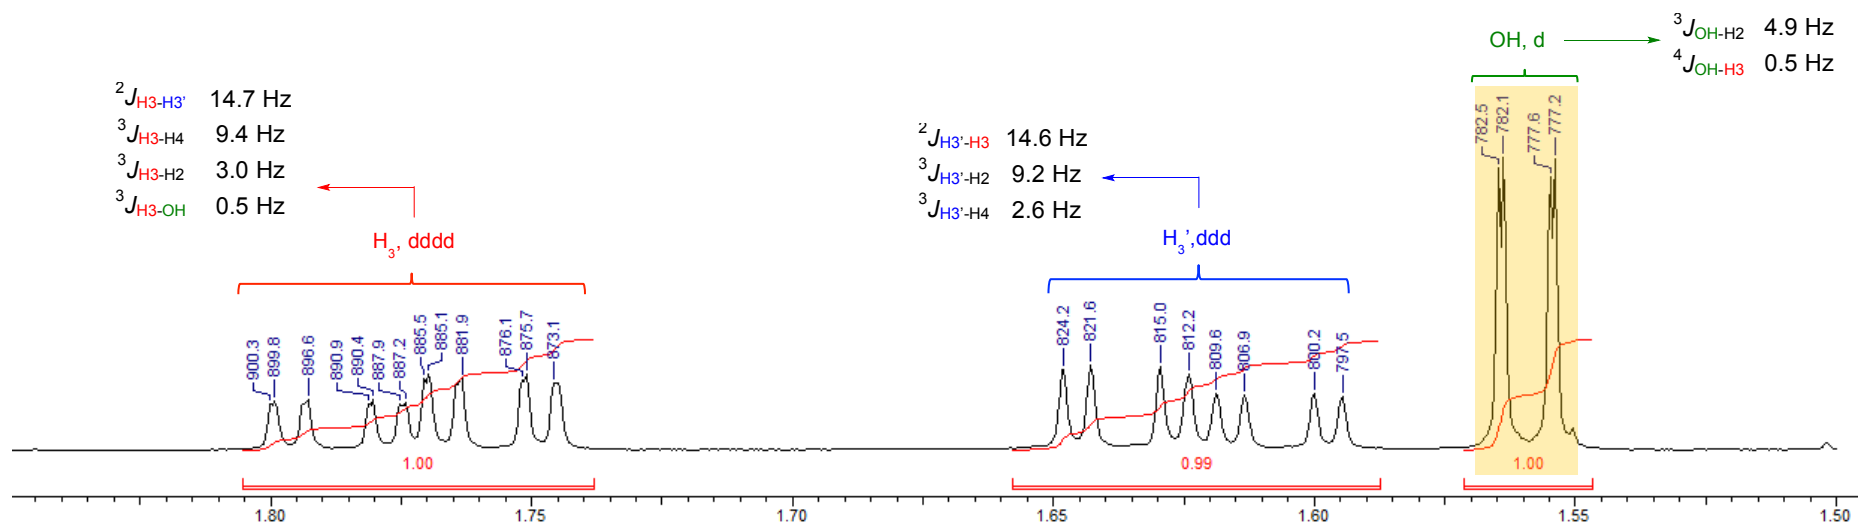 $^1\text{H}$  NMR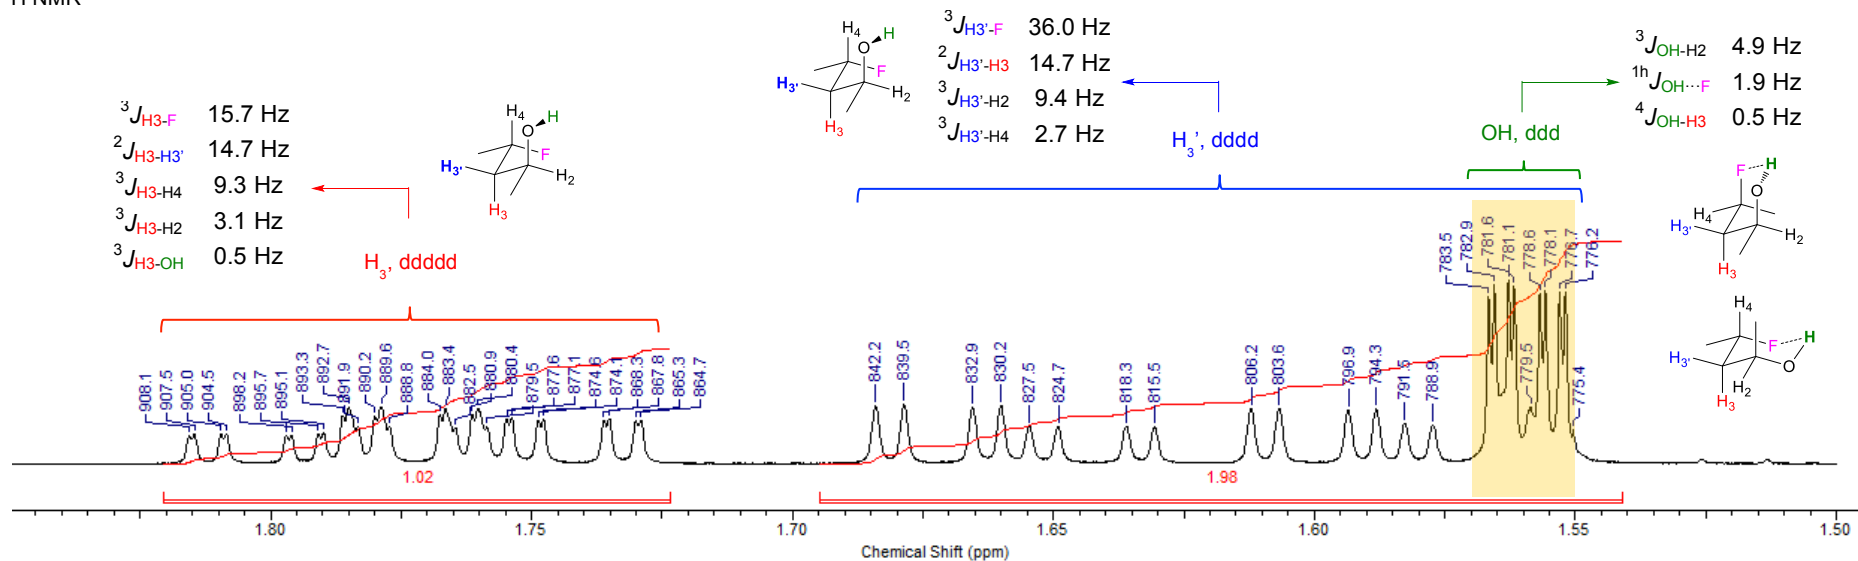

### 5.3.3 Comparison of $^1\text{H}$ NMR of OH, H-3 and H-3' signals at 25 °C and -50 °C ( $\text{CDCl}_3$ , 500 MHz) (*anti*-A)

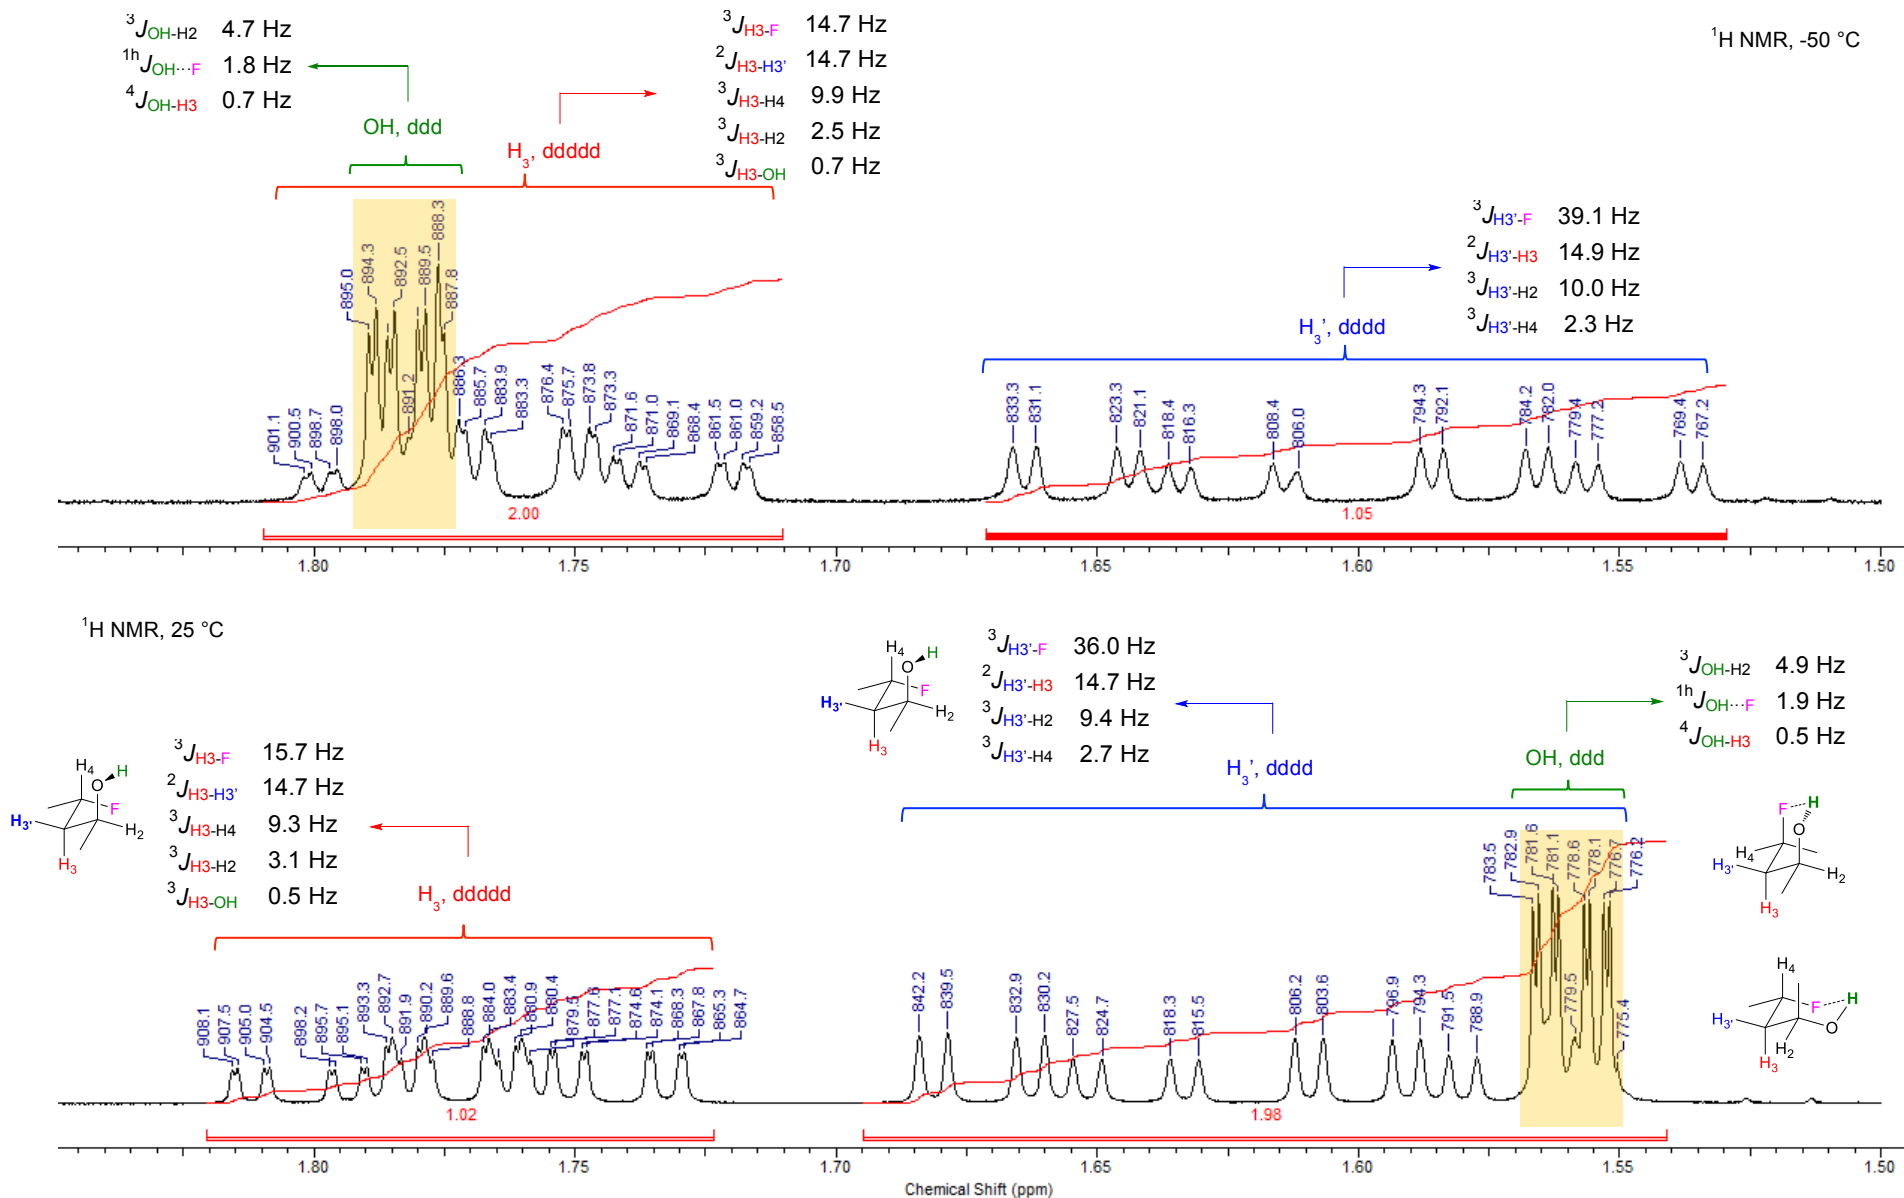

5.3.4 Detail of  $^1\text{H}$  and  $^1\text{H}\{^{19}\text{F}\}$  NMR of OH, H-3 and H-3' signals at  $-50\text{ }^\circ\text{C}$  ( $\text{CDCl}_3$ , 500 MHz) (*anti-A*)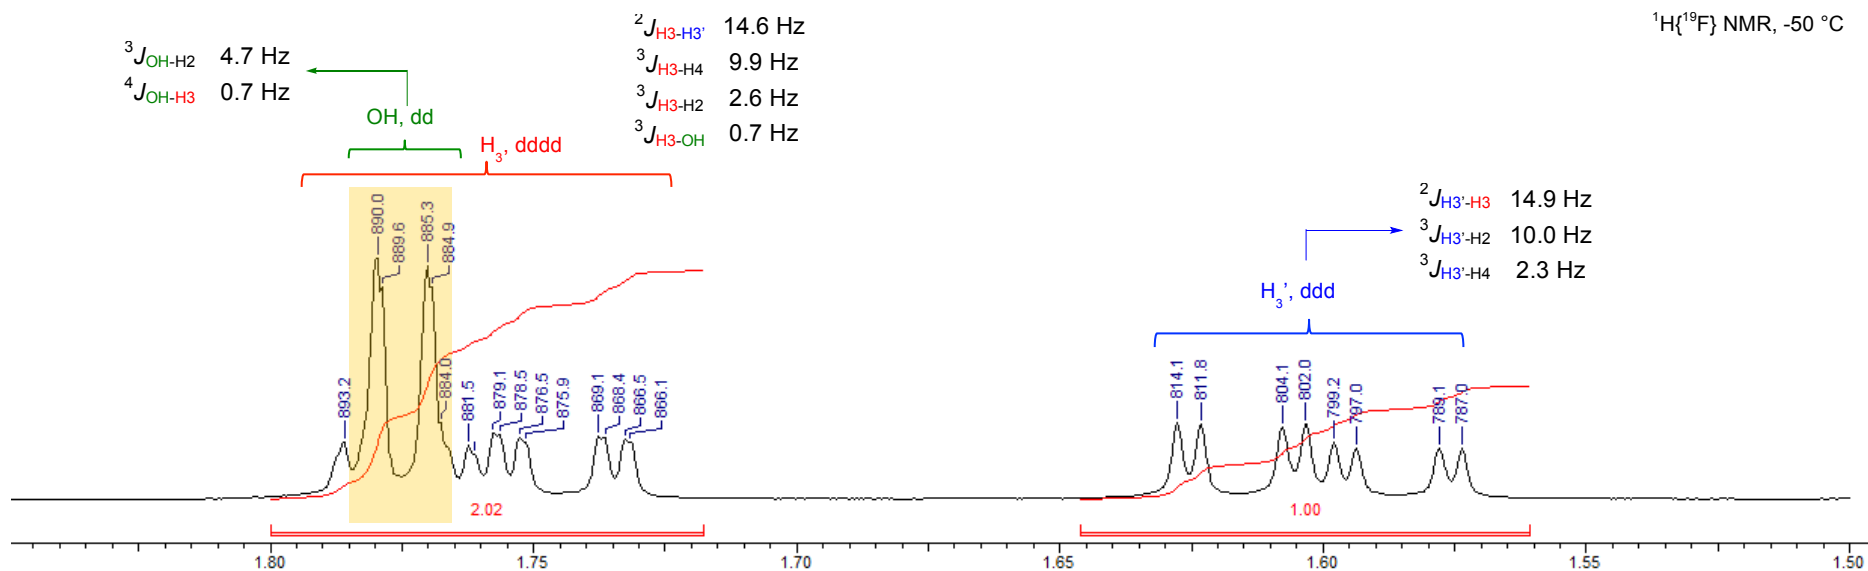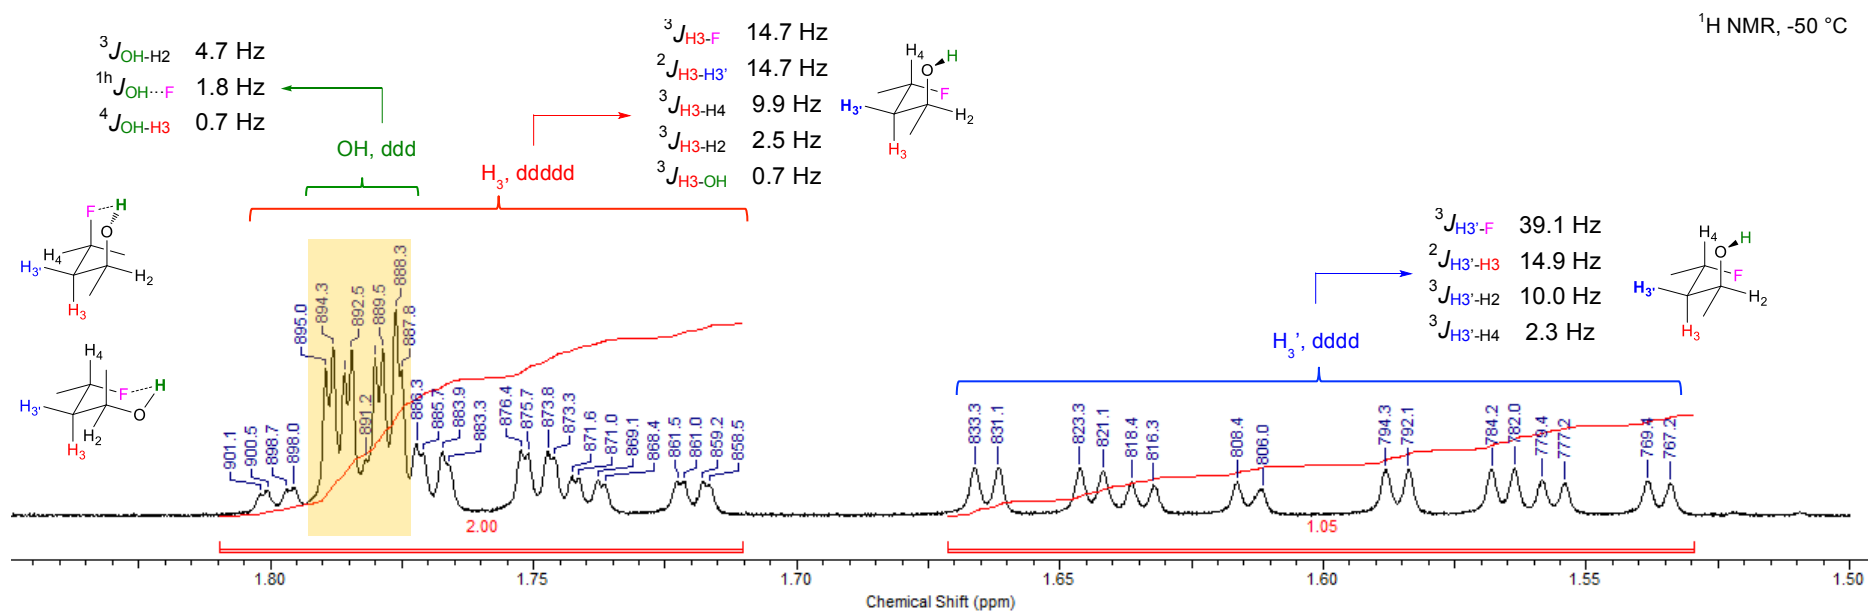

5.3.5  $^{19}\text{F}$  NMR spectrum ( $\text{CDCl}_3$ , 470 MHz, 25 °C) (*anti*-A)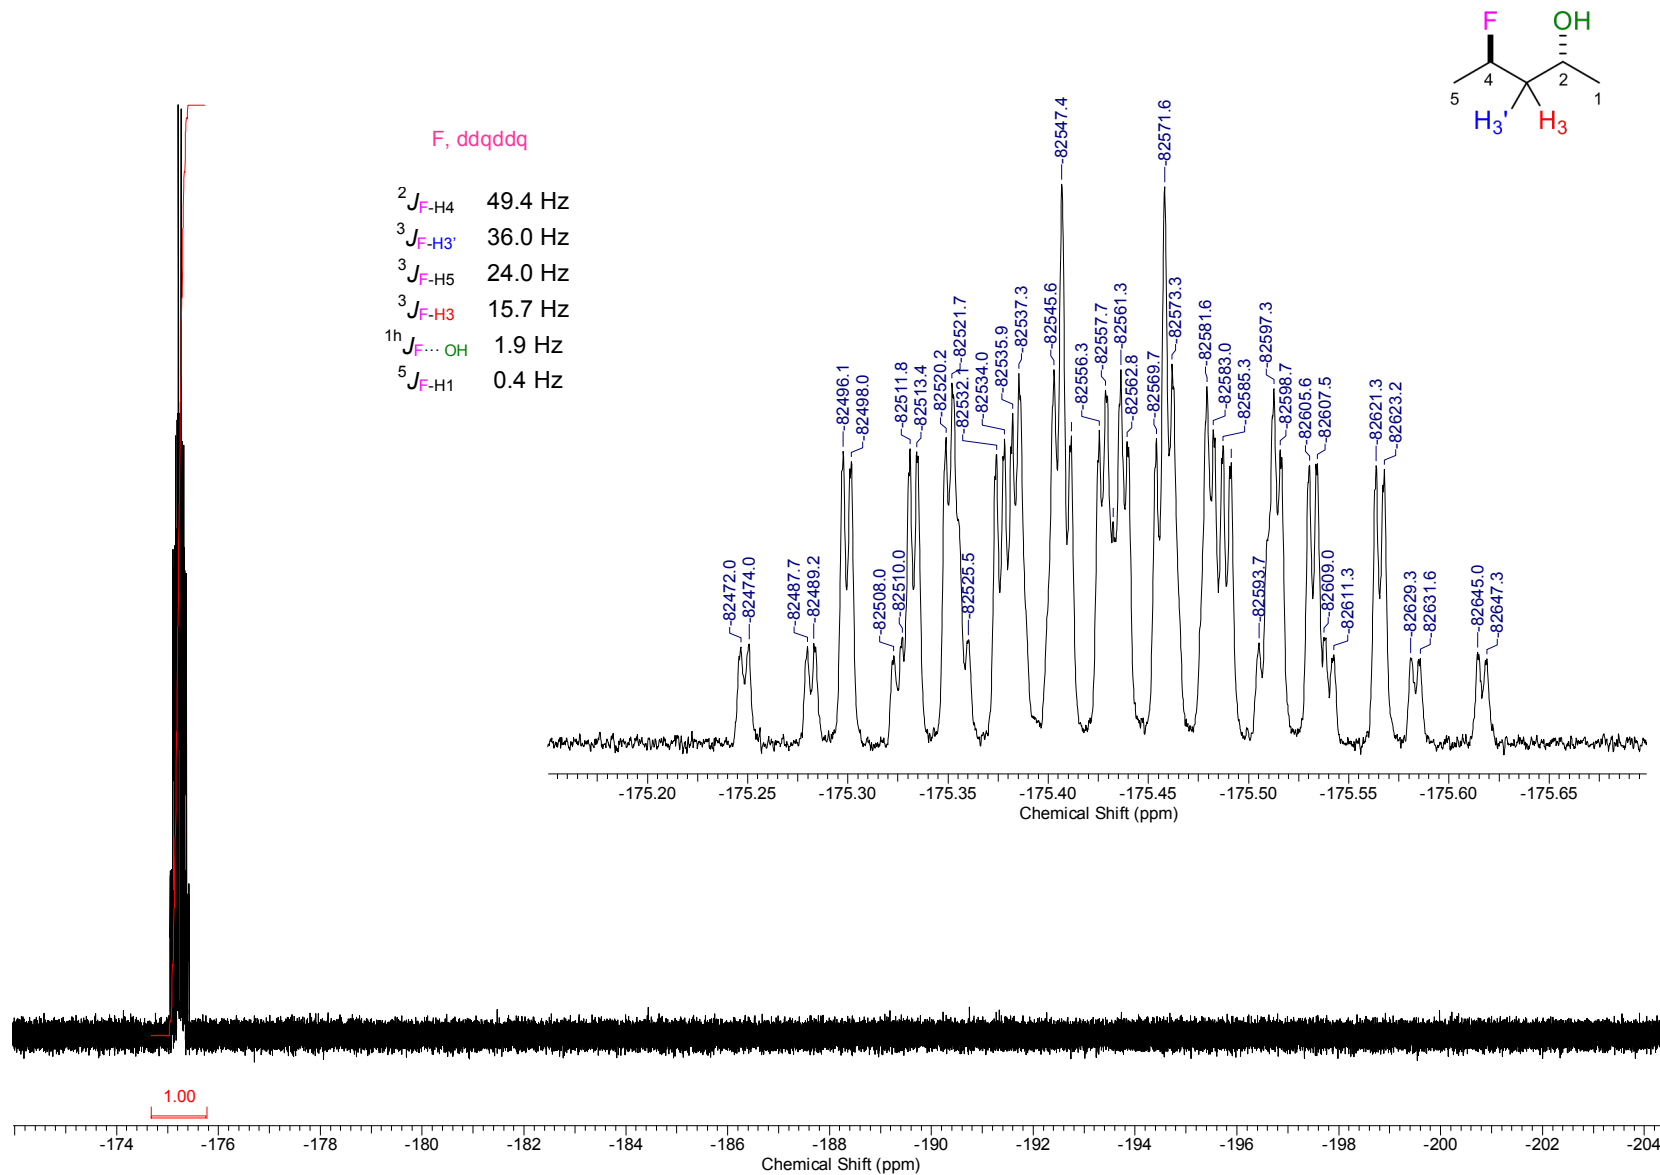

5.3.6  $^{19}\text{F}$  NMR spectrum ( $\text{CDCl}_3$ , 470 MHz,  $-50\text{ }^\circ\text{C}$ ) (*anti*-A)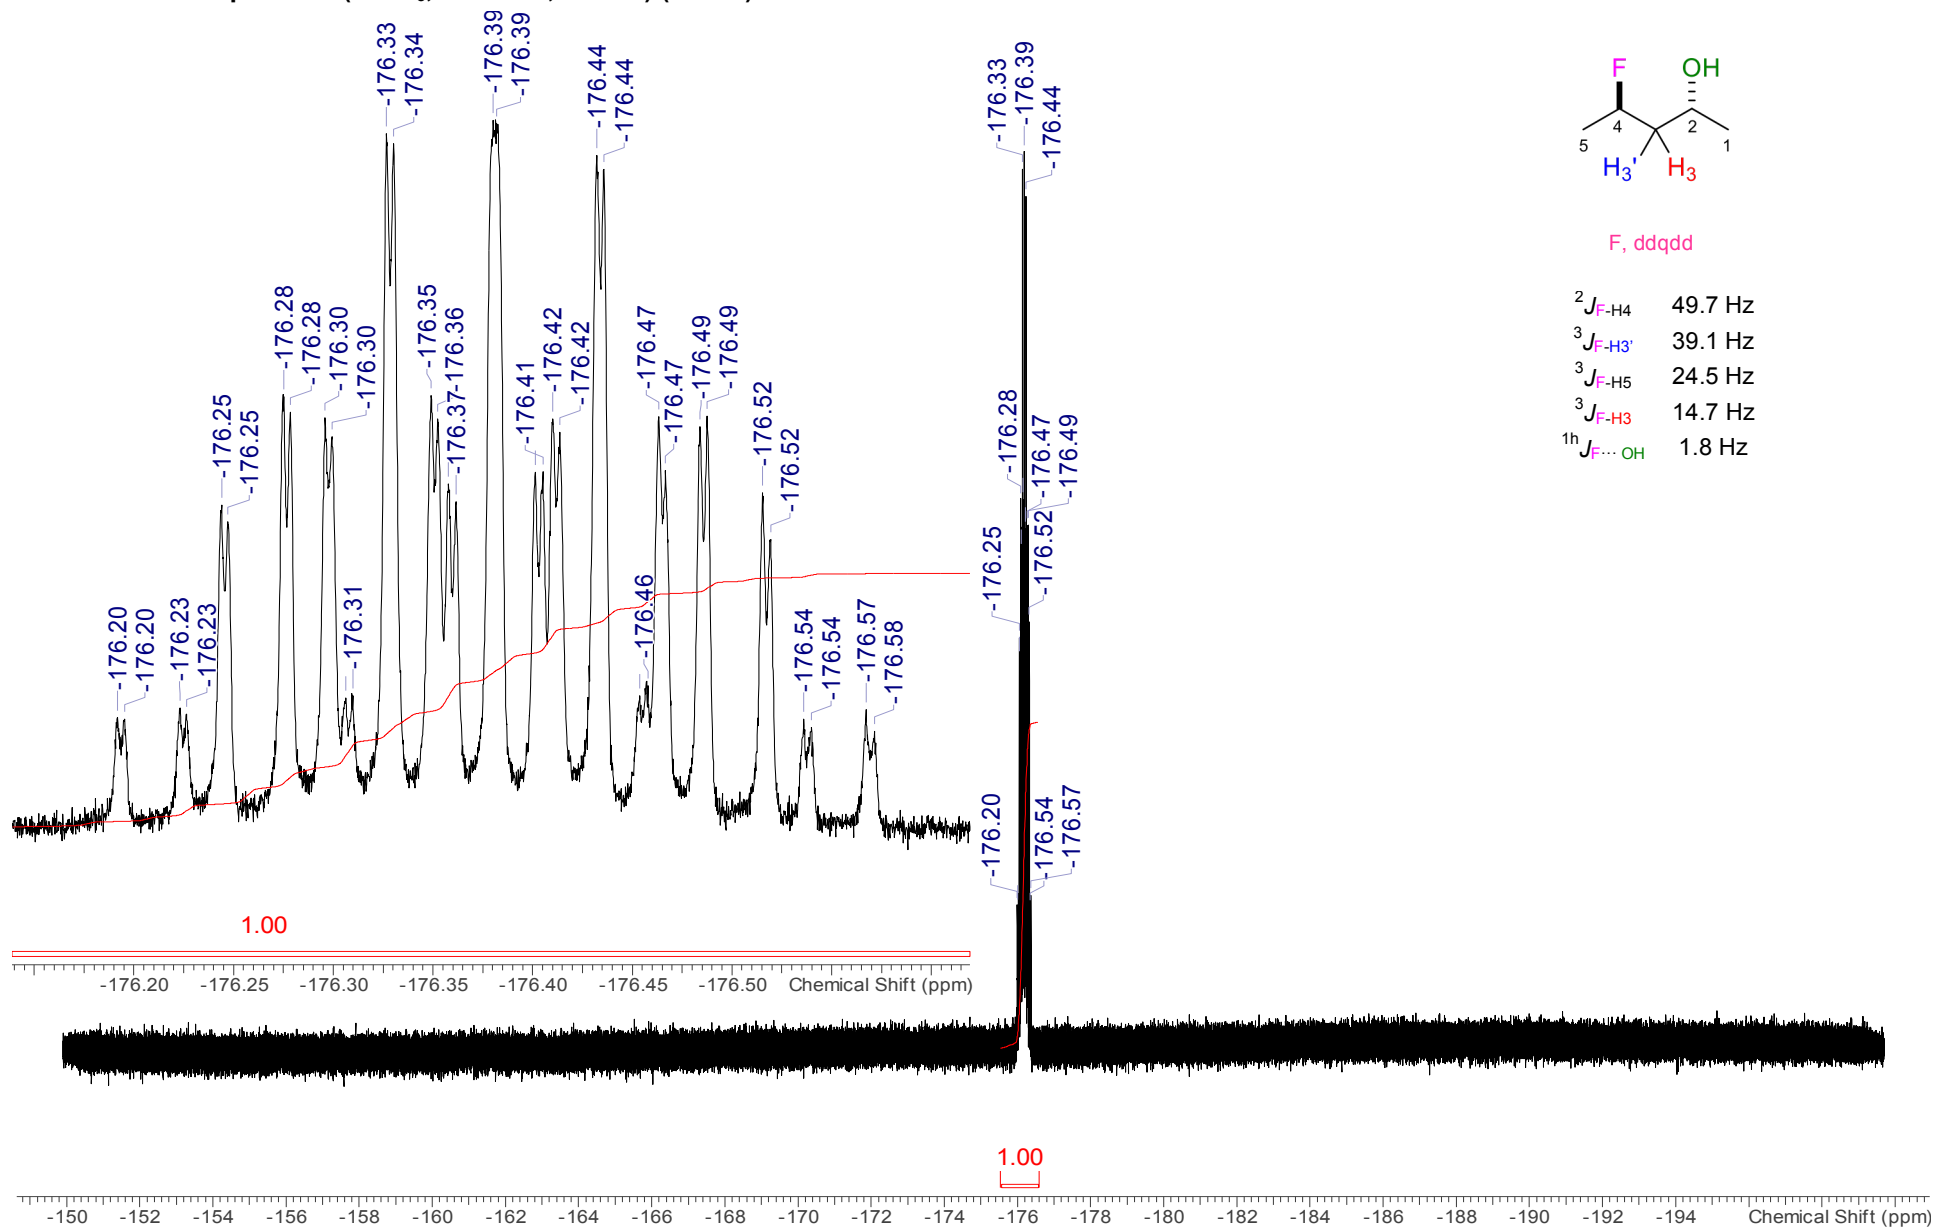

## 5.4 4-fluorobutan-2-ol (B)

5.4.1  $^1\text{H}$  NMR spectrum ( $\text{CDCl}_3$ , 500 MHz, 25  $^\circ\text{C}$ )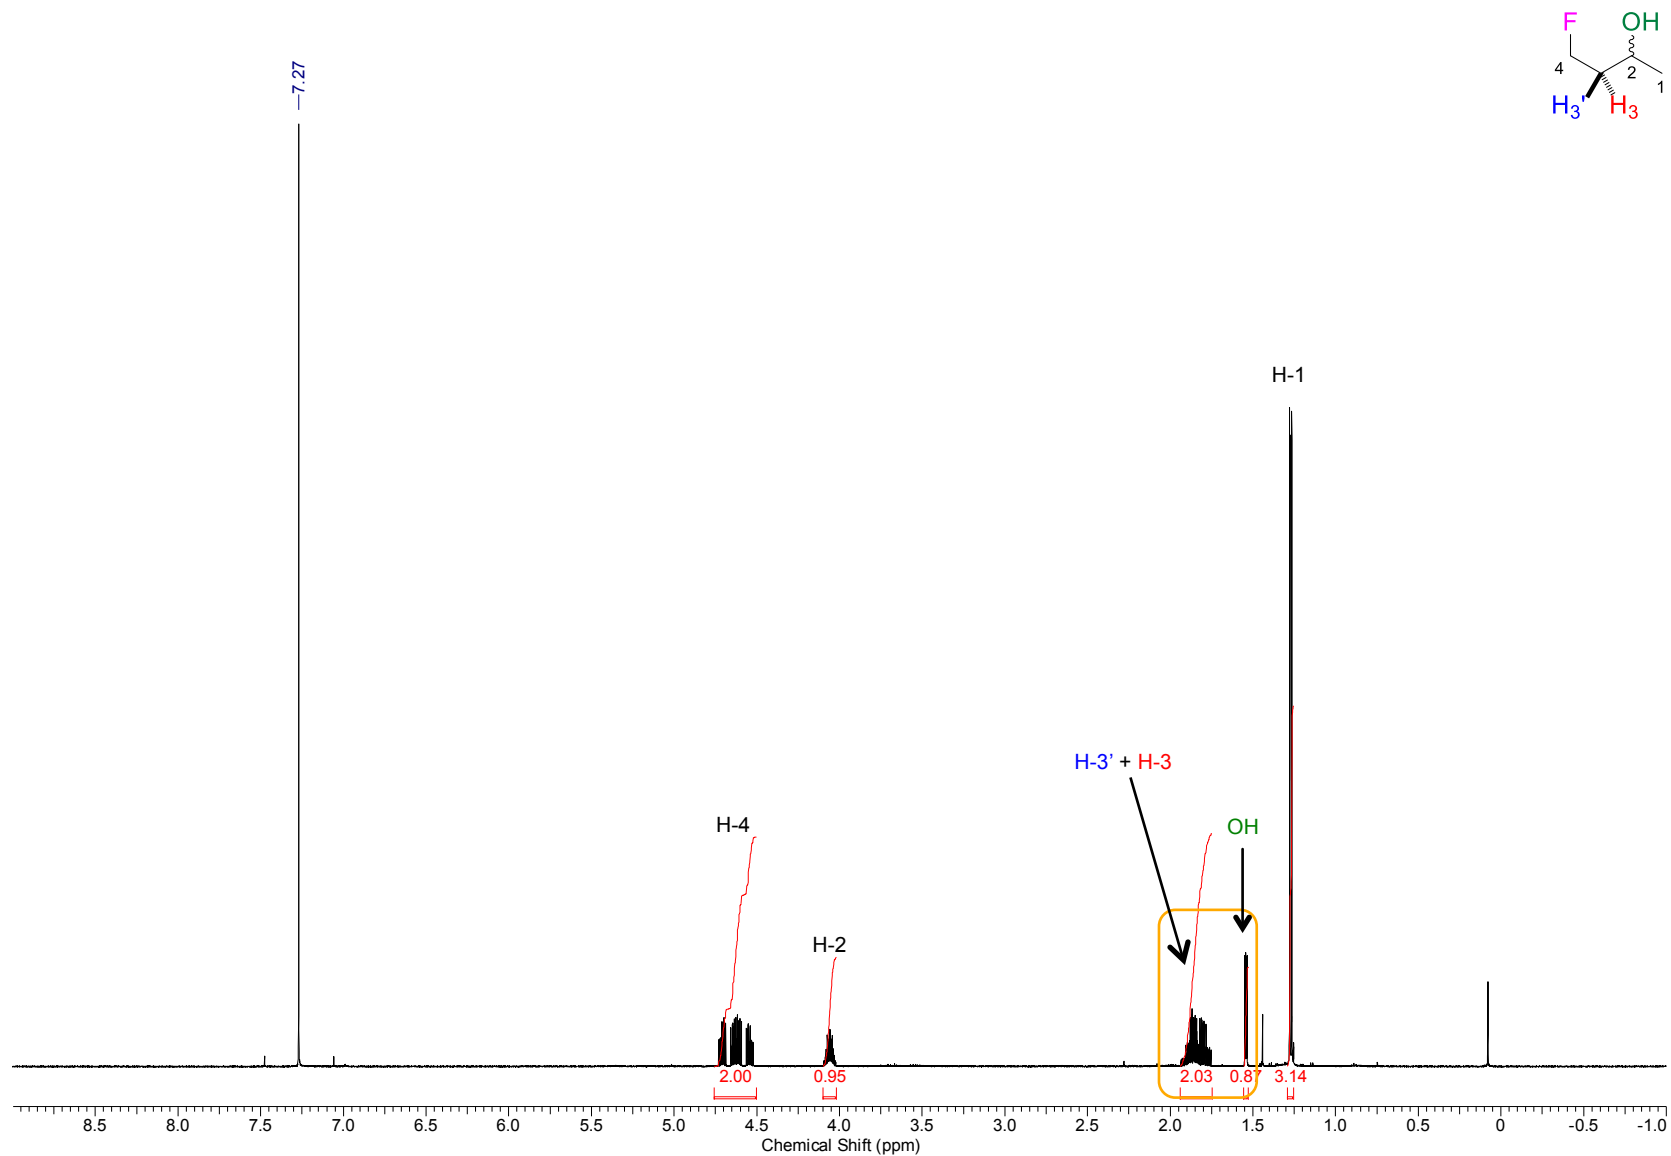



5.4.2 Detail of  $^1\text{H}$  and  $^1\text{H}[^{19}\text{F}]$  NMR of OH, H-3 and H-3' signals ( $\text{CDCl}_3$ , 500 MHz, 25 °C) (B)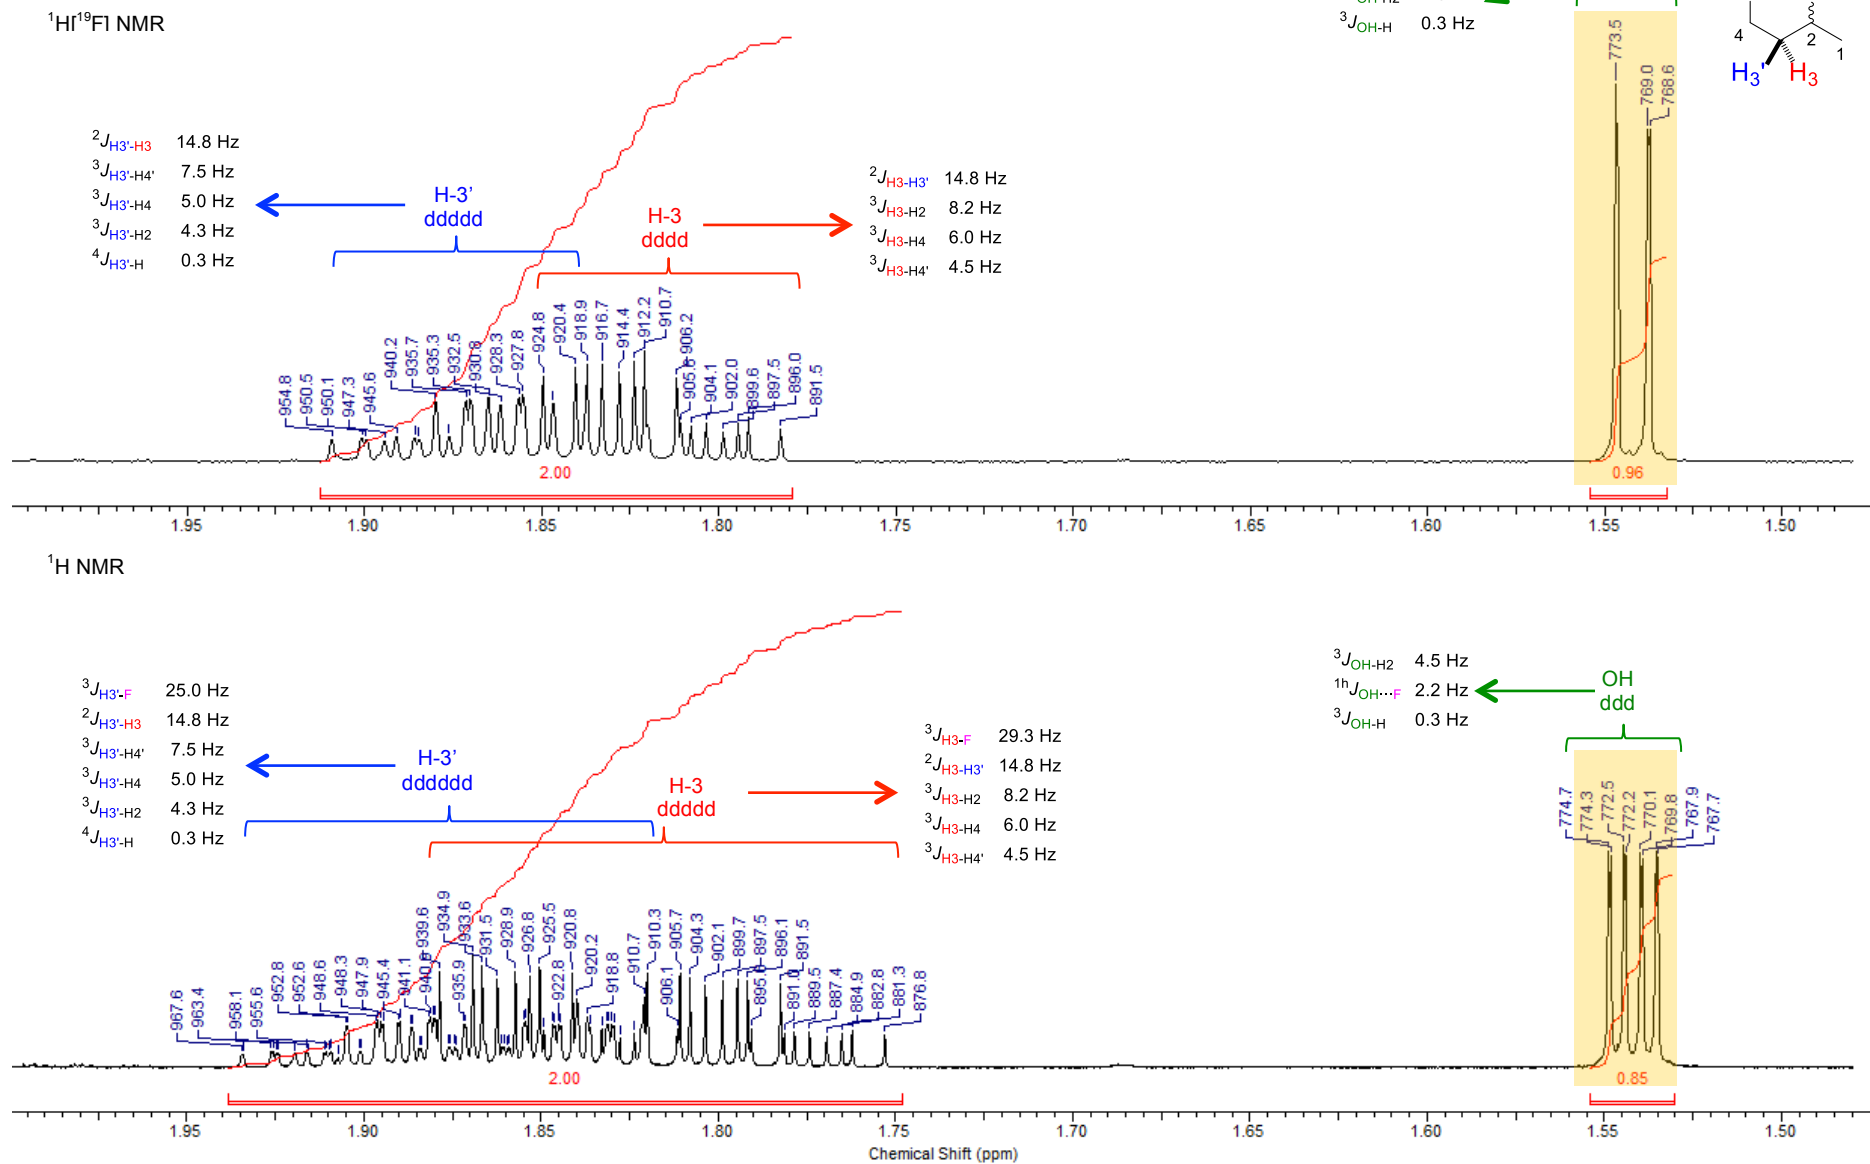

5.4.3  $^{19}\text{F}$  NMR spectrum ( $\text{CDCl}_3$ , 470 MHz, 25 °C) (B)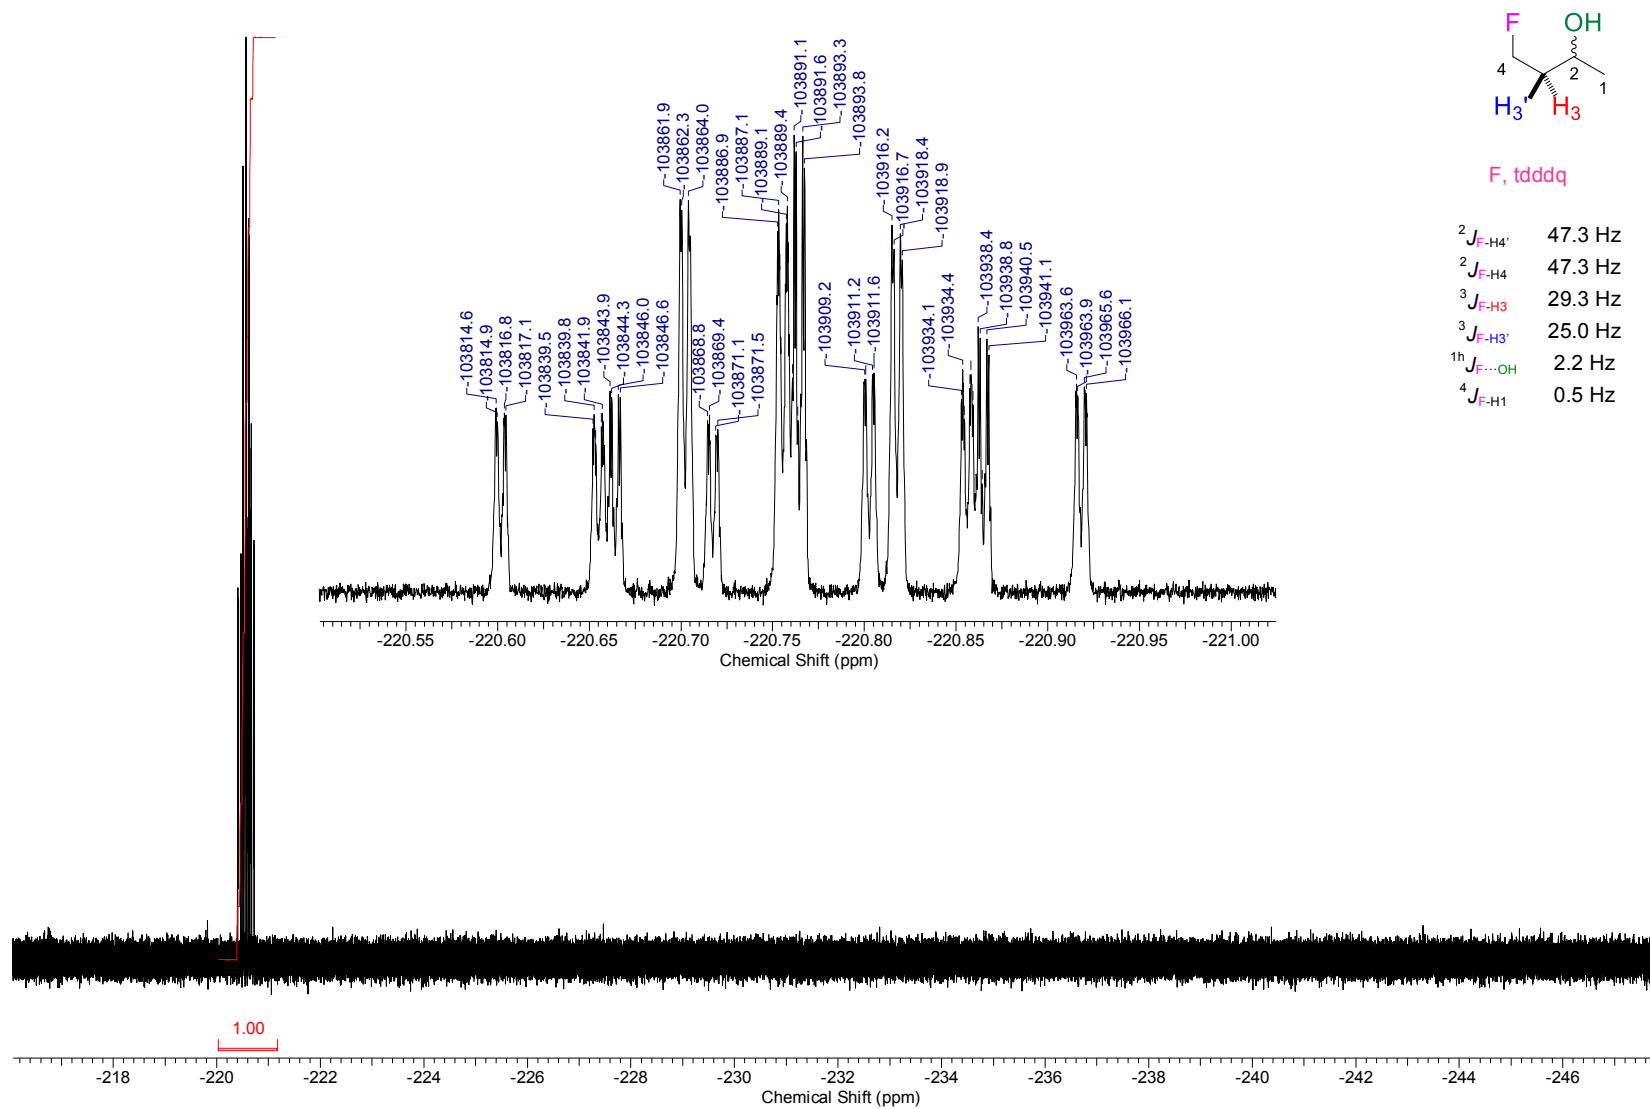

## 5.5 3-fluoro-2,2-dimethylpropan-1-ol (C)

5.5.1  $^1\text{H}$  NMR spectrum ( $\text{CDCl}_3$ , 500 MHz, 25 °C)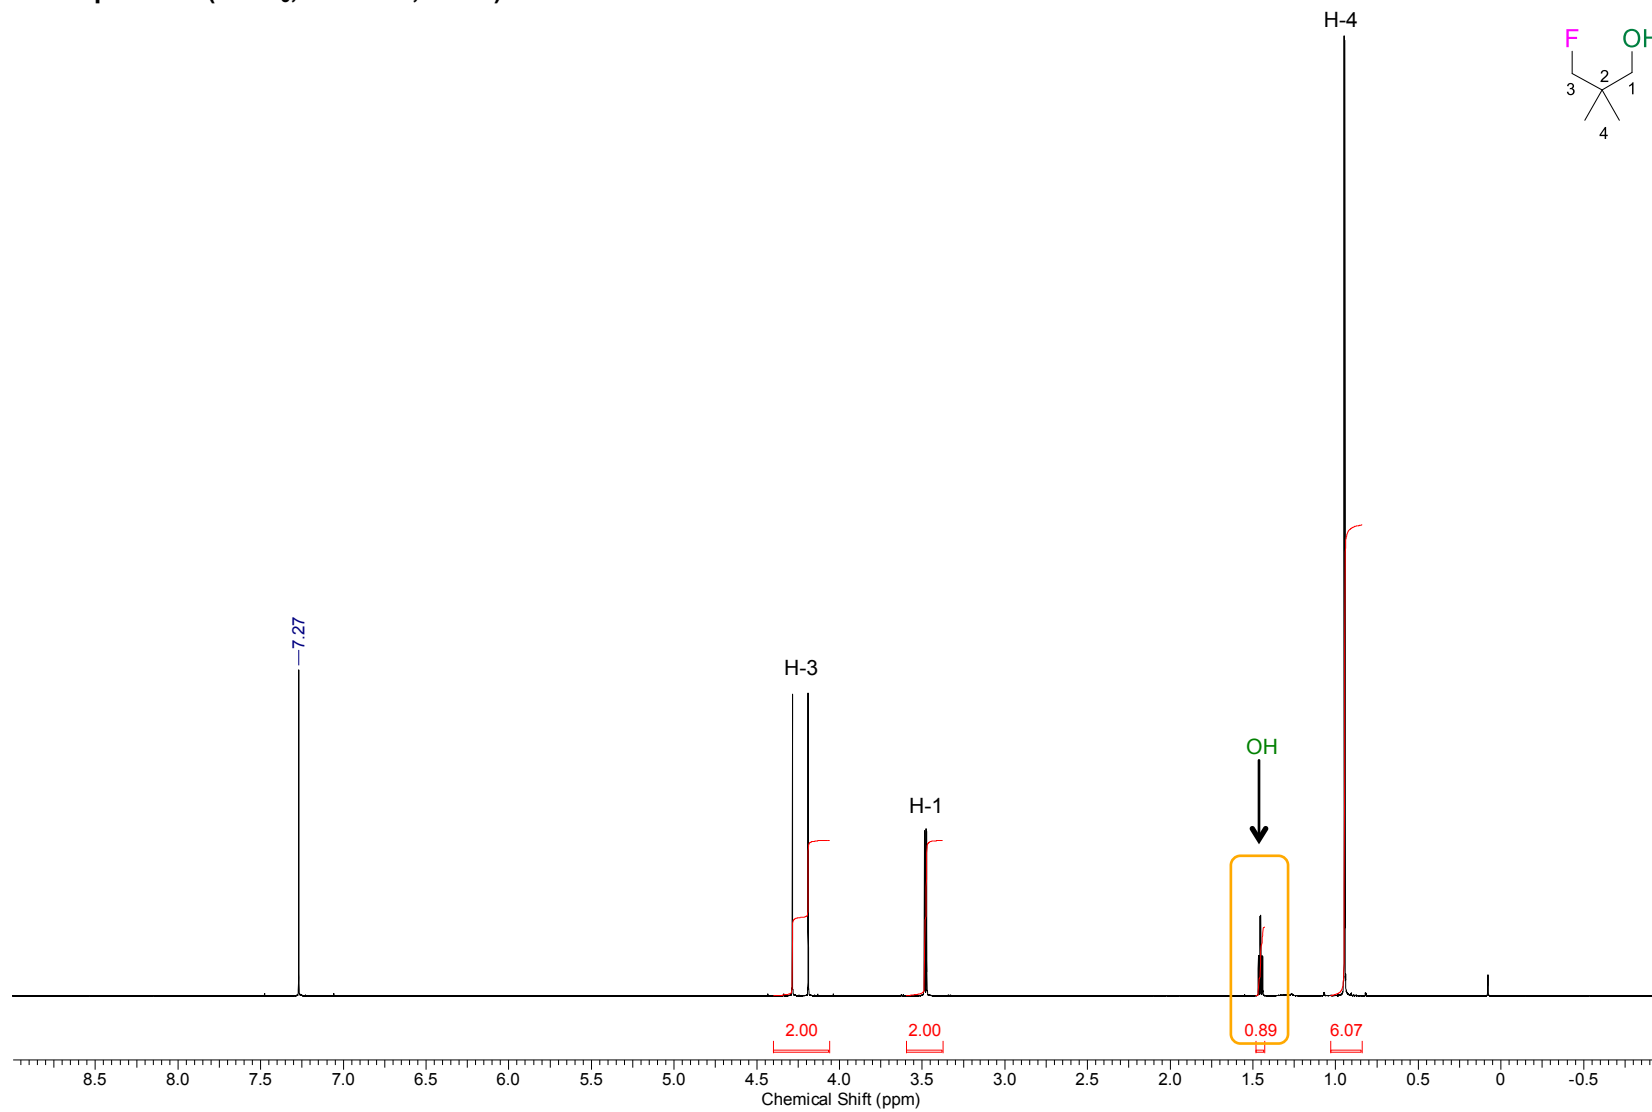

5.5.2 Detail of  $^1\text{H}$  and  $^1\text{H}[^{19}\text{F}]$  NMR of OH signal ( $\text{CDCl}_3$ , 500 MHz, 25 °C) I (C) $^1\text{H}[^{19}\text{F}]$  NMR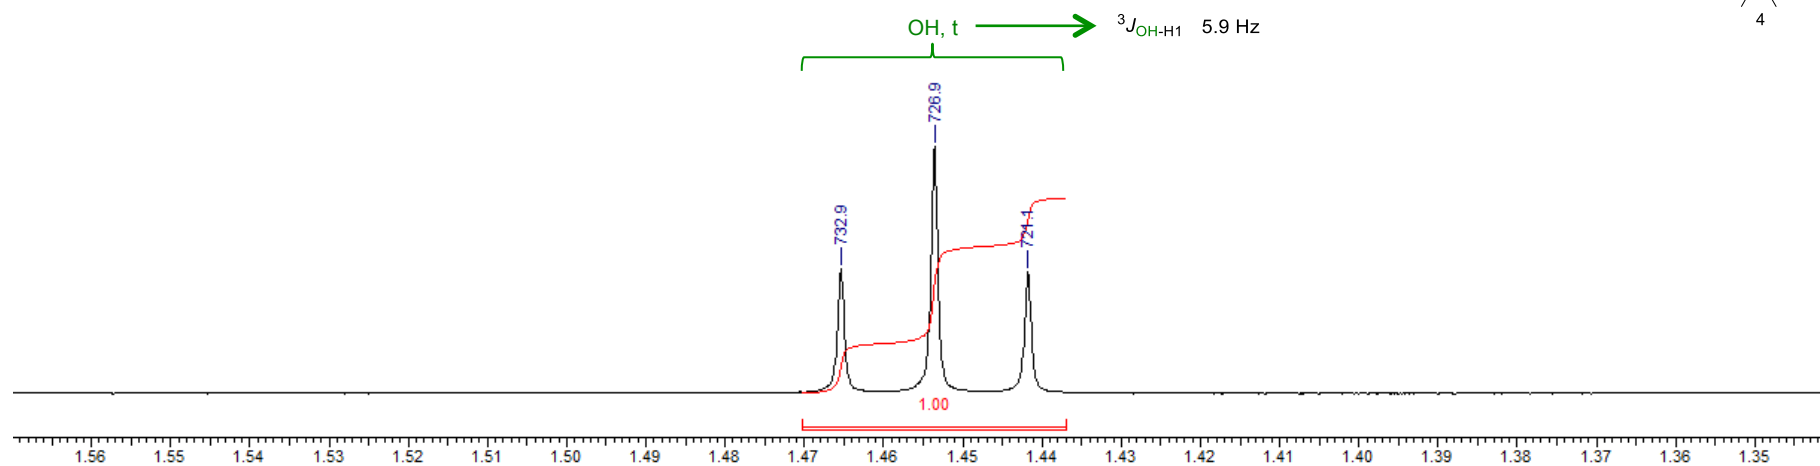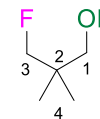 $^1\text{H}$  NMR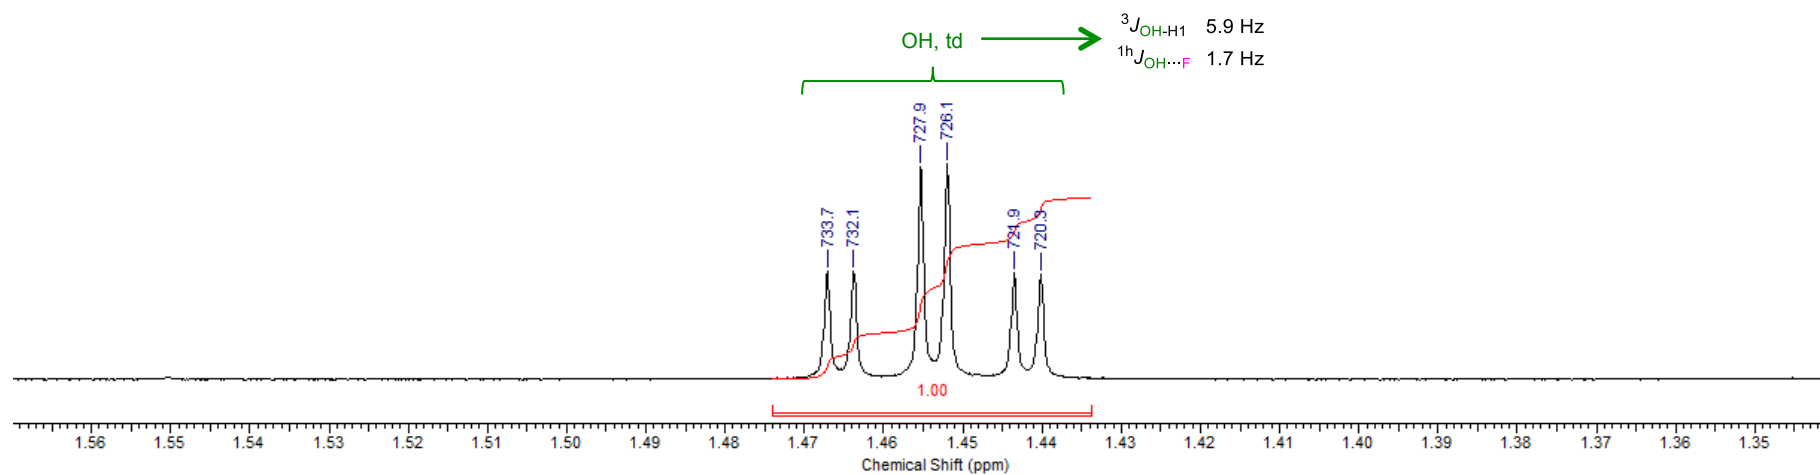

5.5.3  $^{19}\text{F}$  NMR spectrum ( $\text{CDCl}_3$ , 470 MHz, 25 °C) (C)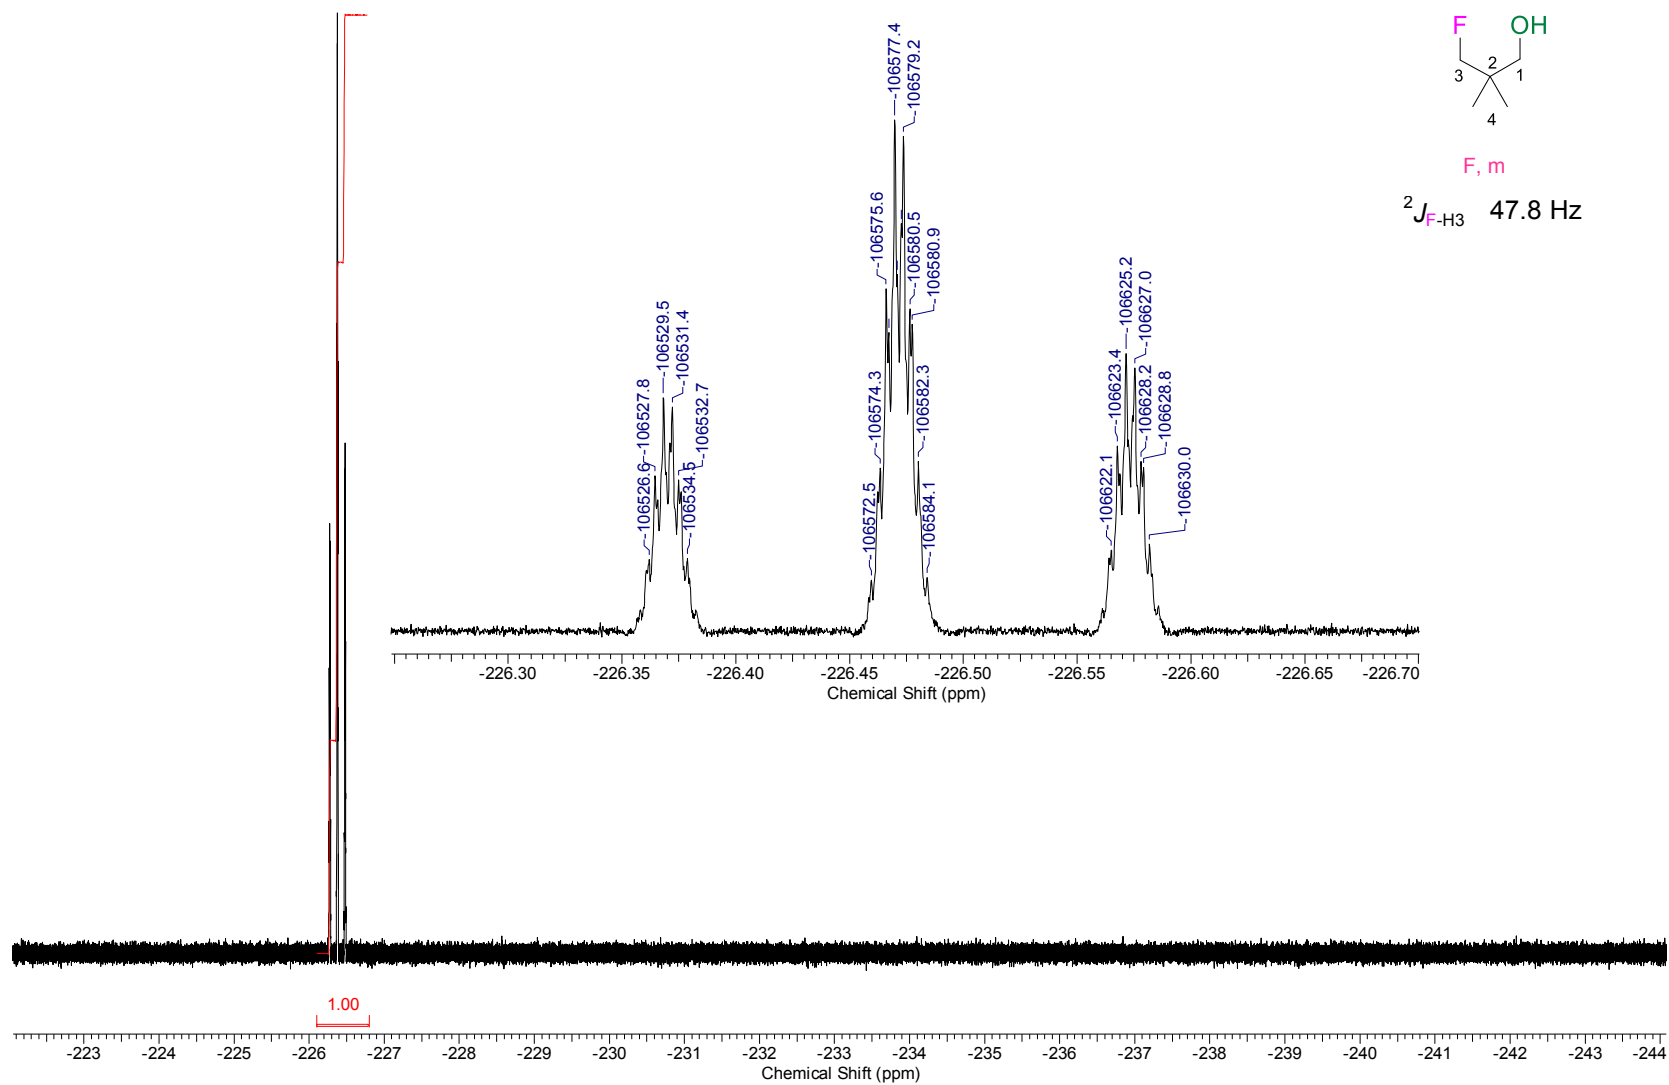

## 5.6 3-fluoropropan-1-ol (D)

5.6.1  $^1\text{H}$  NMR spectrum ( $\text{CDCl}_3$ , 500 MHz, 25 °C)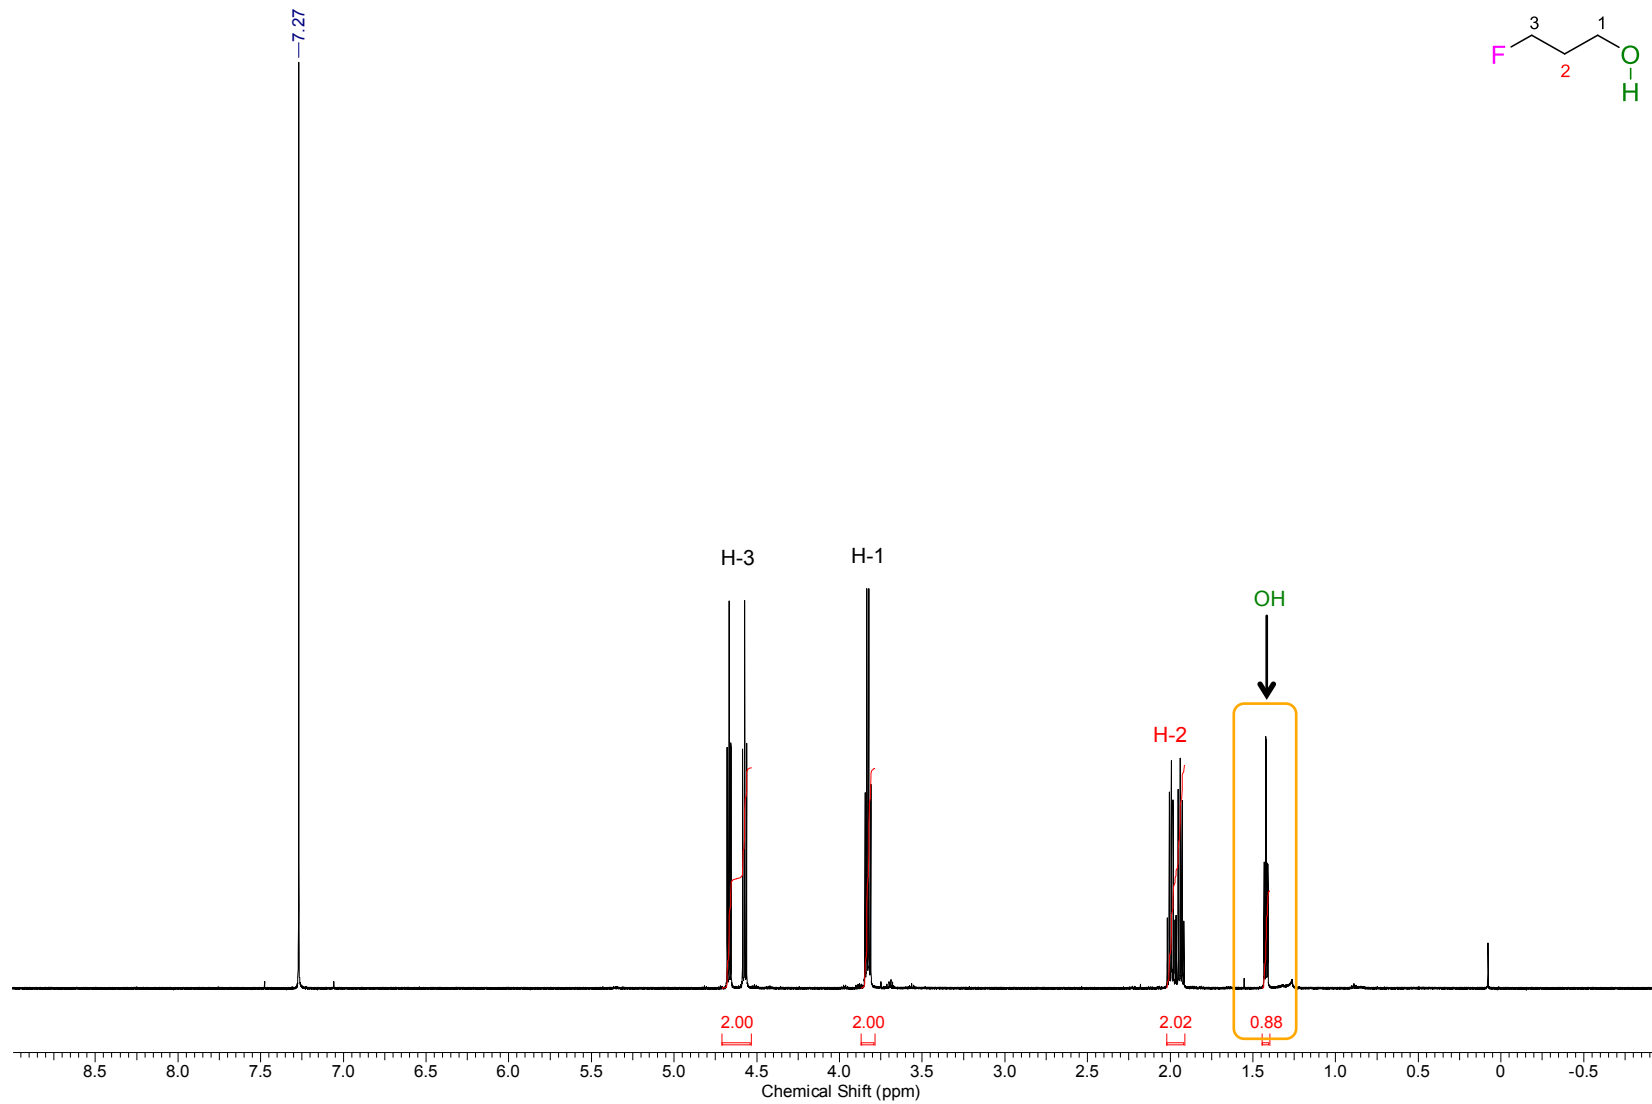

5.6.2 Detail of  $^1\text{H}$  and  $^1\text{H}[^{19}\text{F}]$  NMR of OH signal ( $\text{CDCl}_3$ , 500 MHz, 25 °C) (D)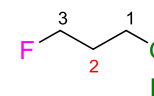 $^1\text{H}[^{19}\text{F}]$  NMR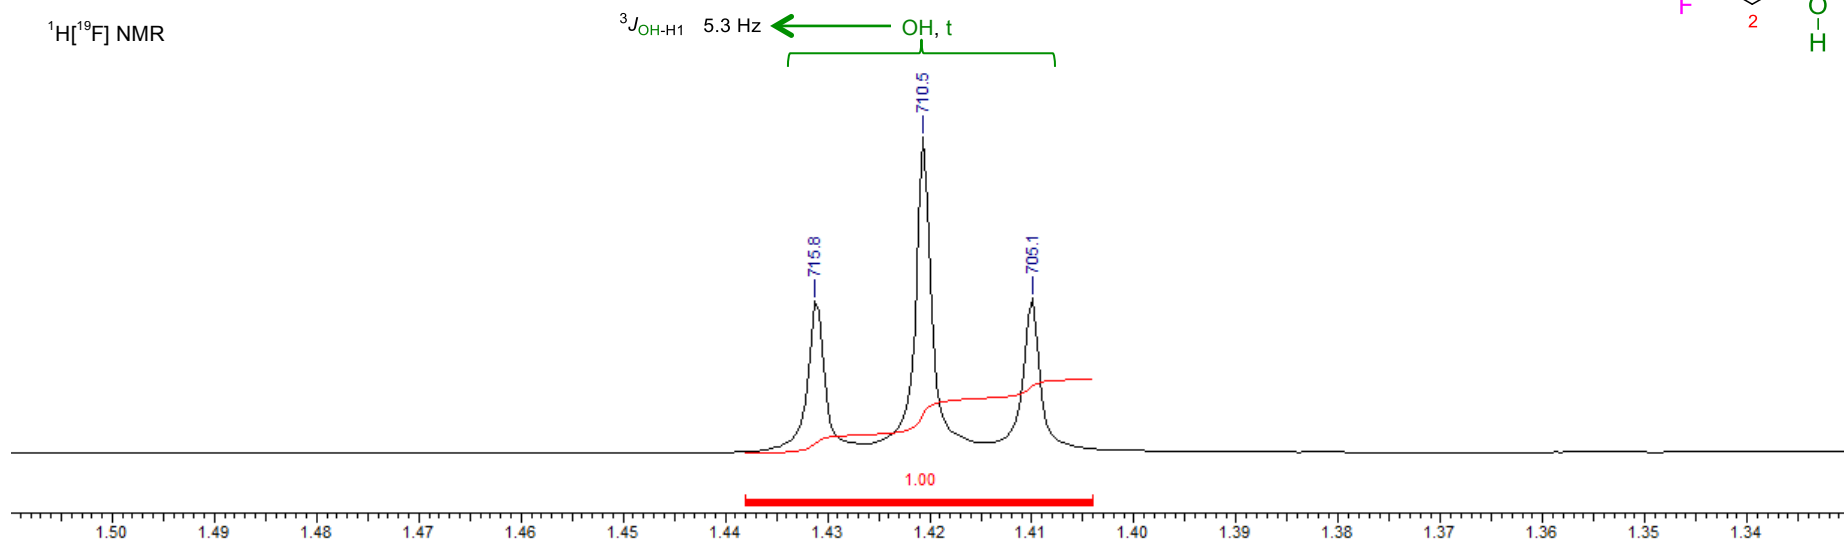 $^1\text{H}$  NMR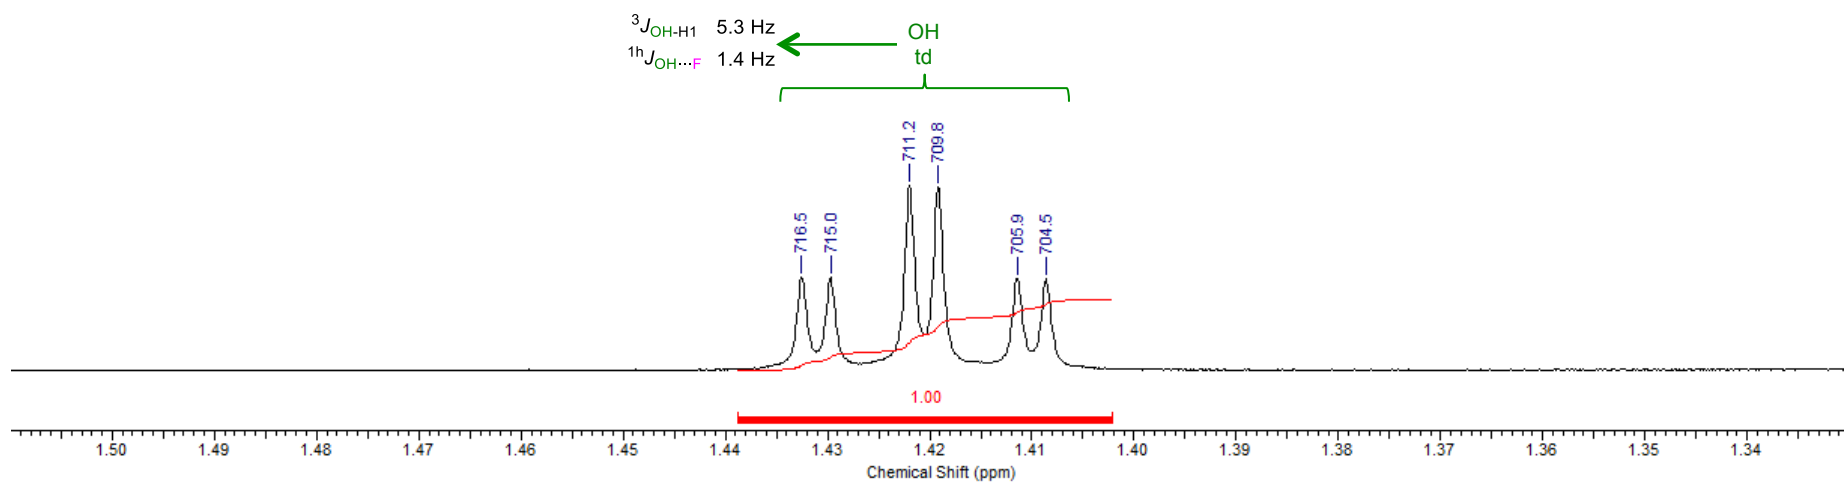

5.6.3 Comparison of  $^1\text{H}$  NMR of OH signal at 25 °C and -50 °C ( $\text{CDCl}_3$ , 500 MHz) (D) $^1\text{H}$  NMR, -50 °C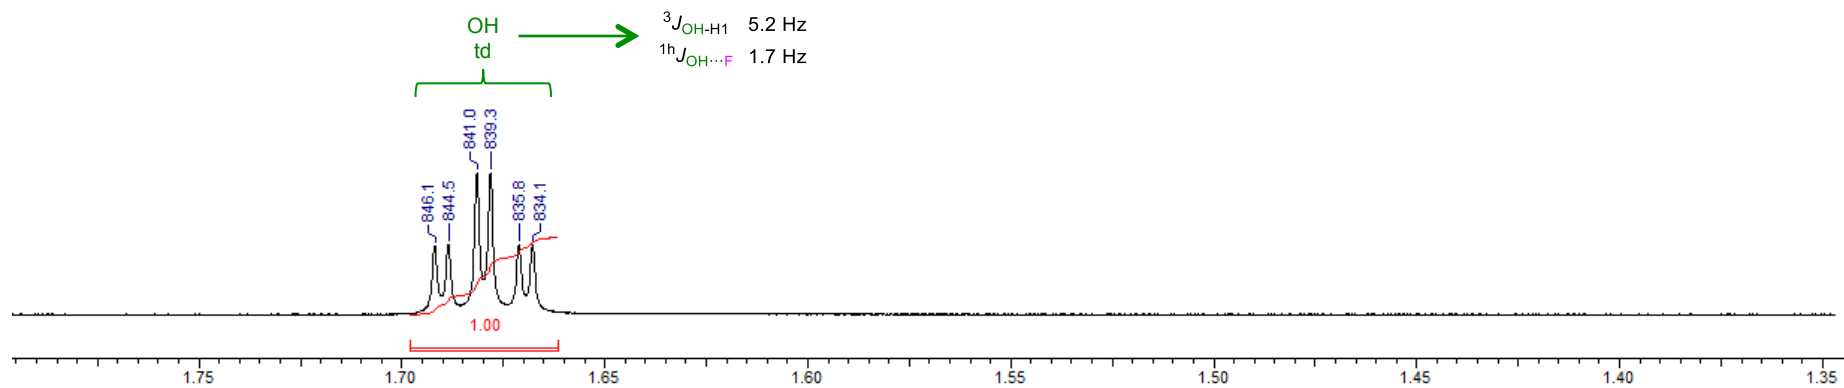 $^1\text{H}$  NMR, 25 °C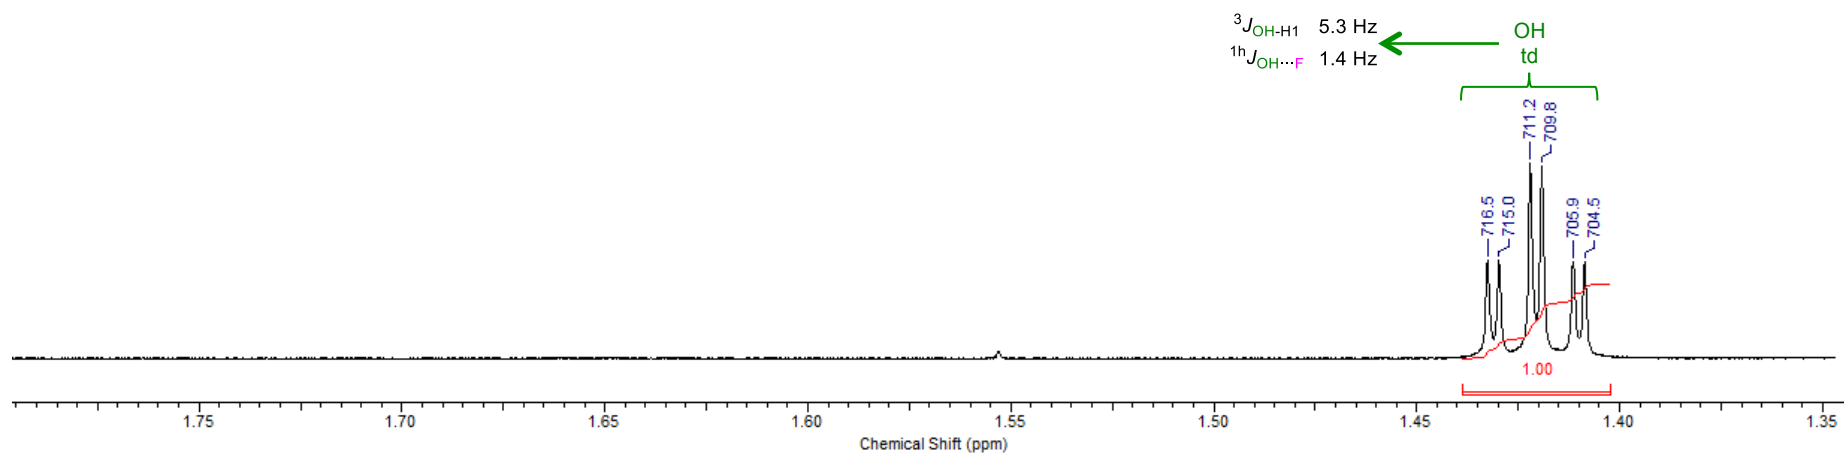



5.6.4 Detail of  $^1\text{H}$  and  $^1\text{H}\{^{19}\text{F}\}$  NMR of OH signals at  $-50\text{ }^\circ\text{C}$  ( $\text{CDCl}_3$ , 500 MHz) (D) $^1\text{H}\{^{19}\text{F}\}$  NMR,  $-50\text{ }^\circ\text{C}$ 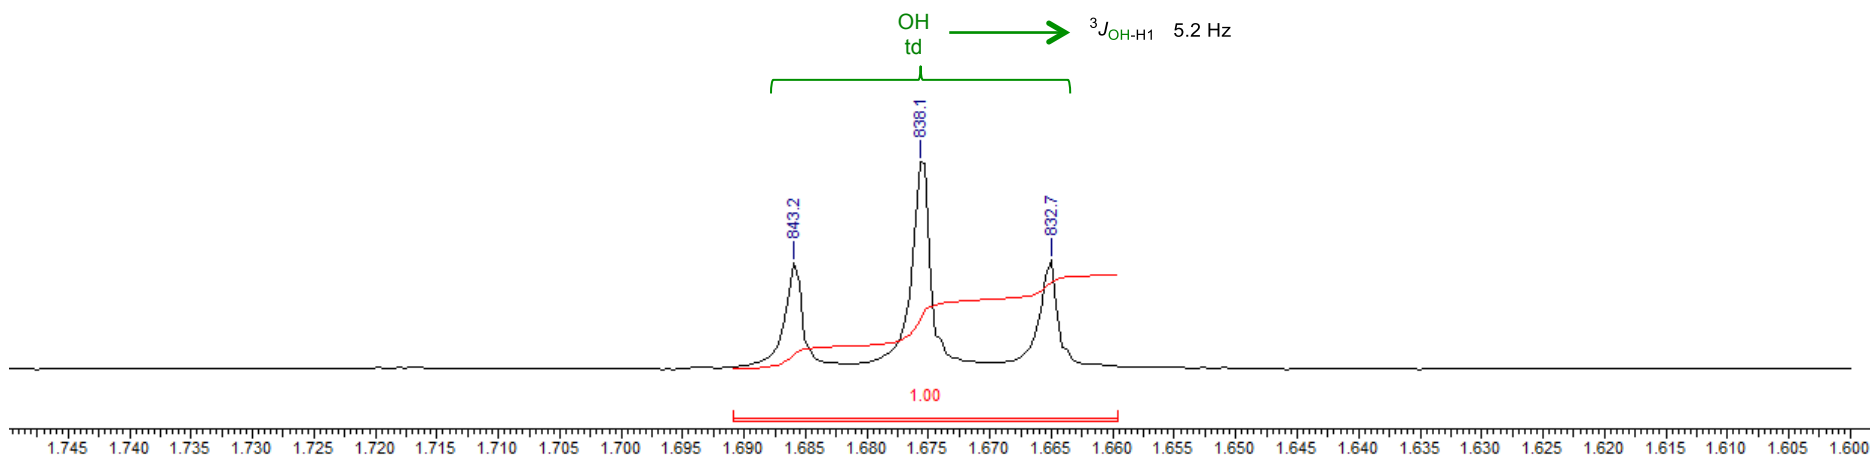 $^1\text{H}$  NMR,  $-50\text{ }^\circ\text{C}$ 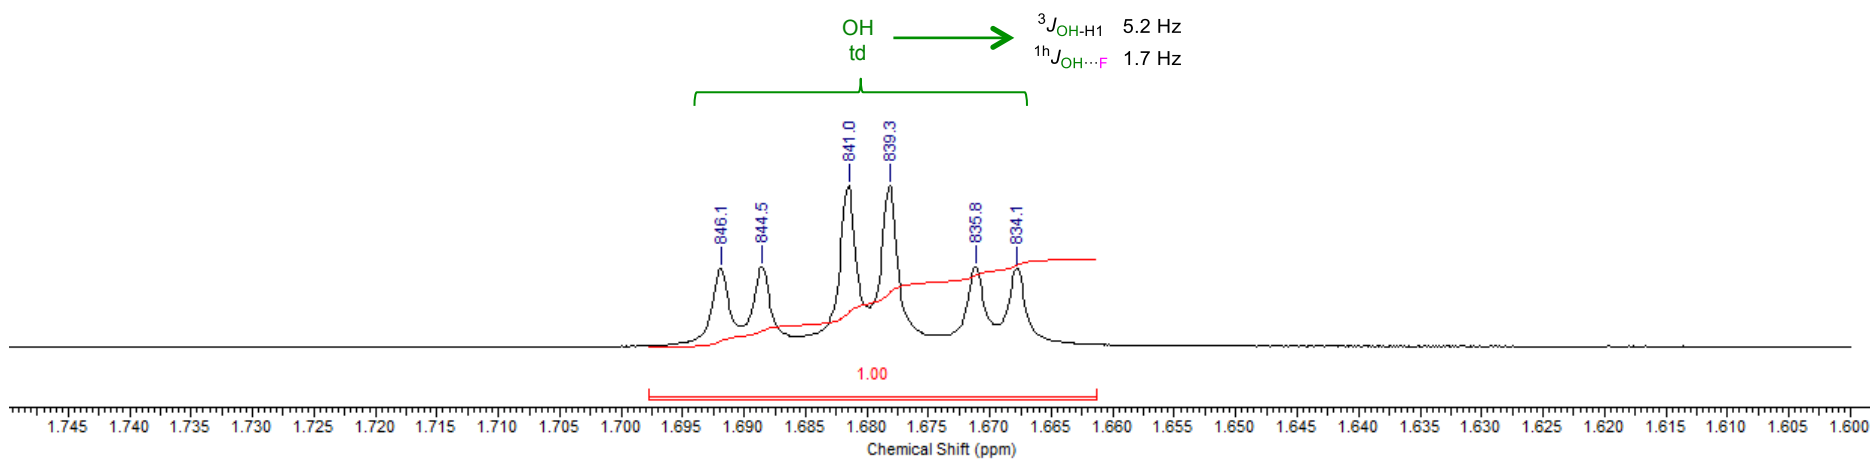

5.6.5  $^{19}\text{F}$  NMR spectrum ( $\text{CDCl}_3$ , 470 MHz, 25 °C) (D)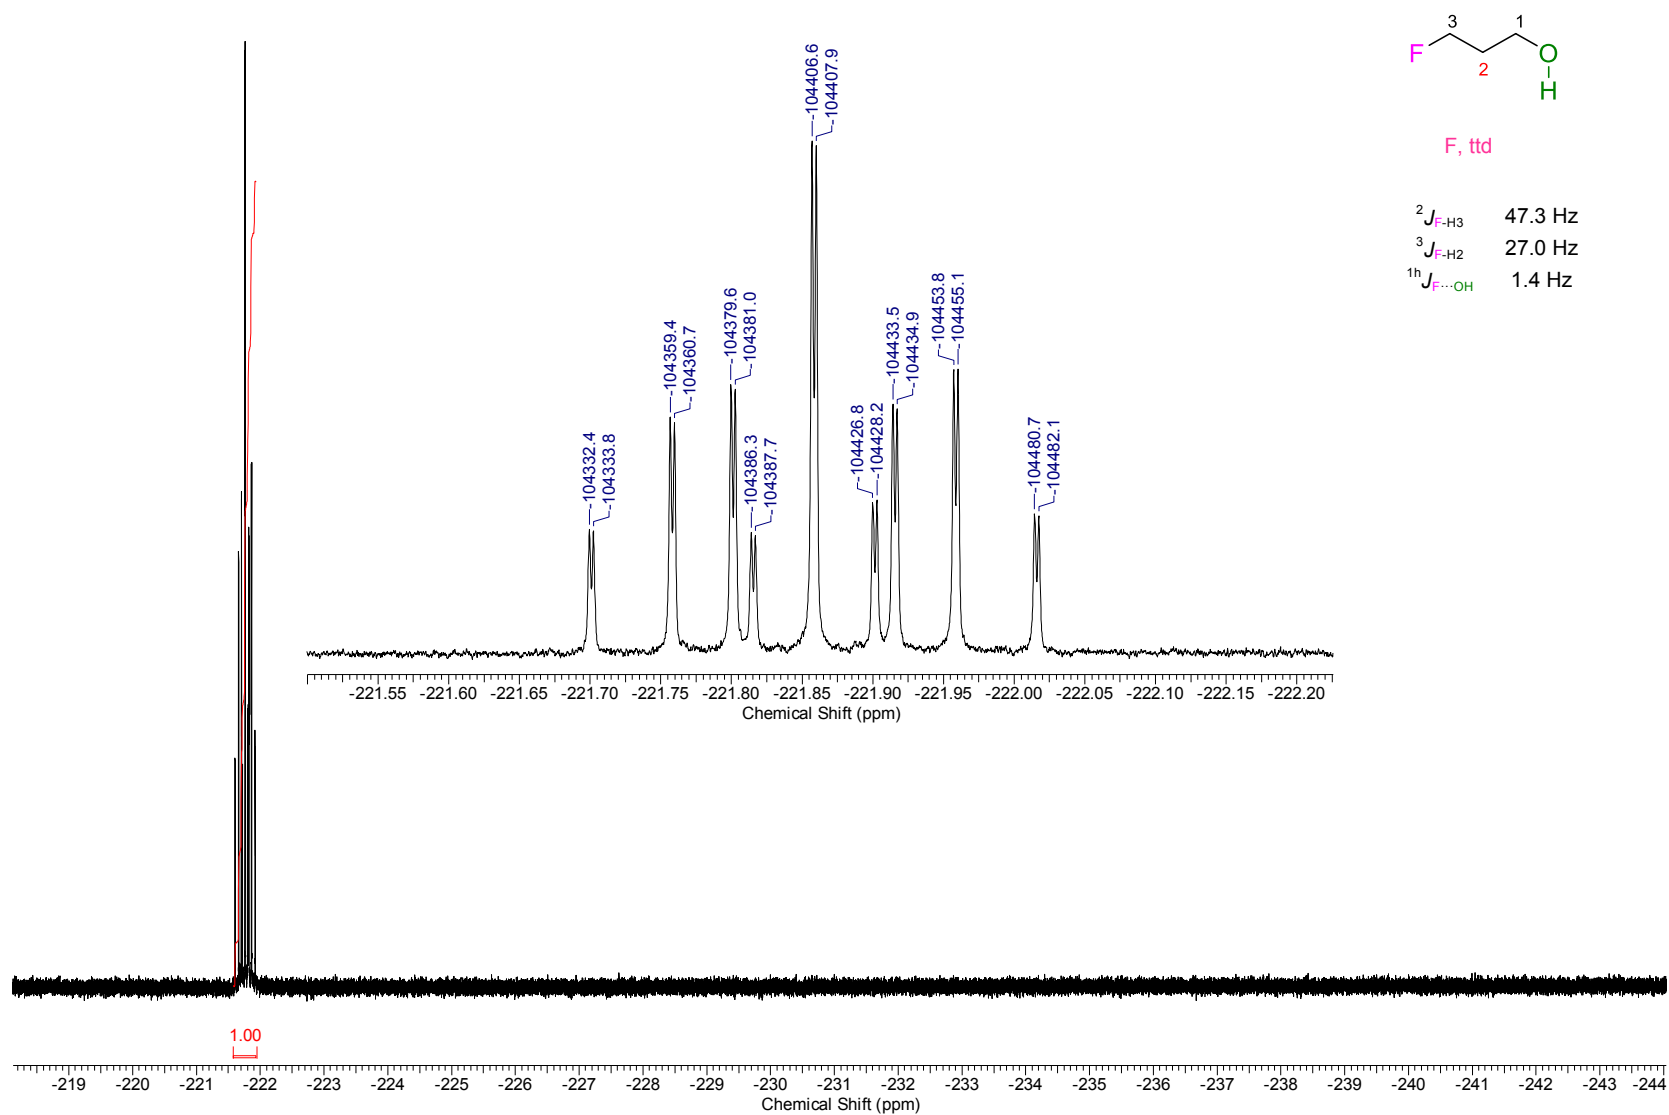

5.6.6  $^{19}\text{F}$  NMR spectrum ( $\text{CDCl}_3$ , 470 MHz,  $-50\text{ }^\circ\text{C}$ ) (D)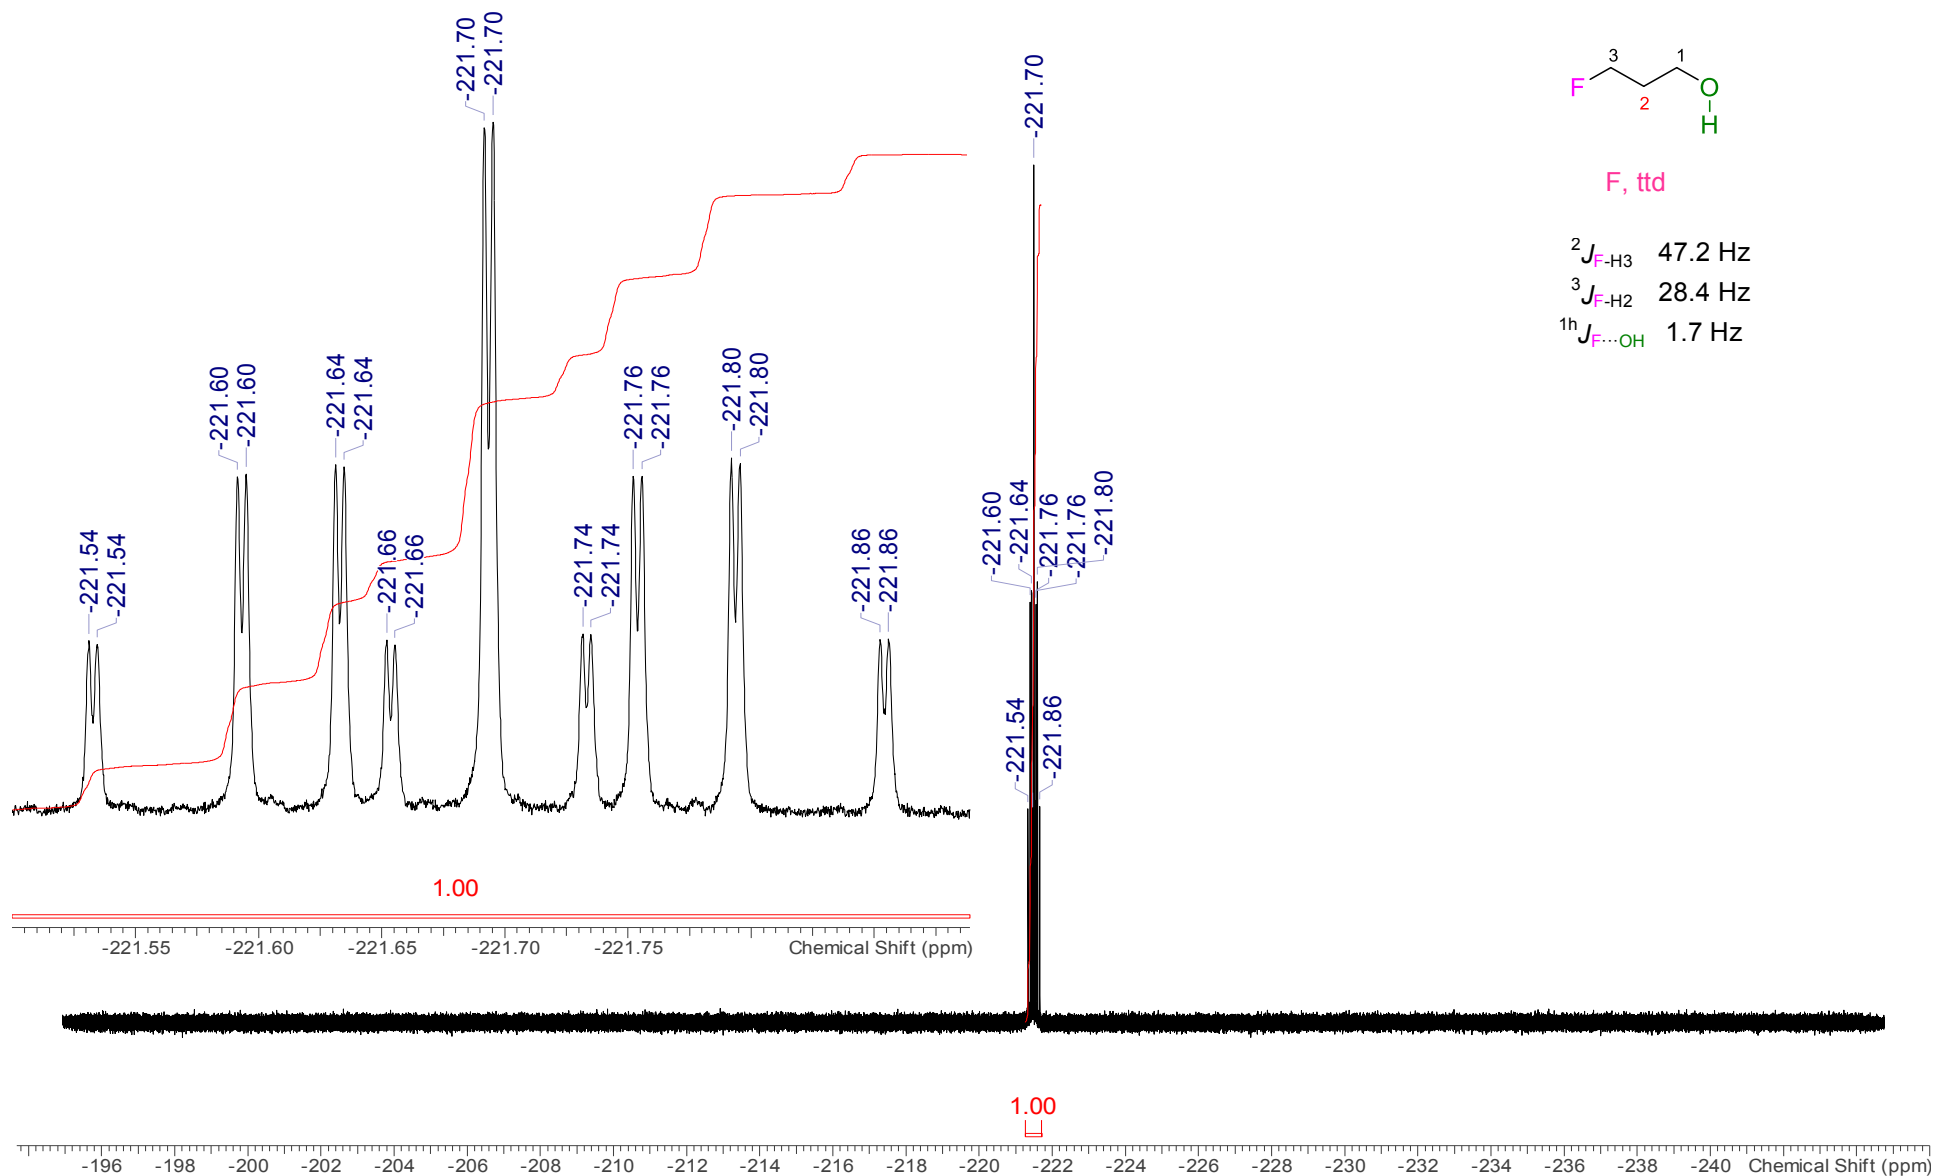

5.6.7  $^1\text{H}$  NMR spectrum ( $\text{CD}_2\text{Cl}_2$ , 500 MHz, 25 °C) (D)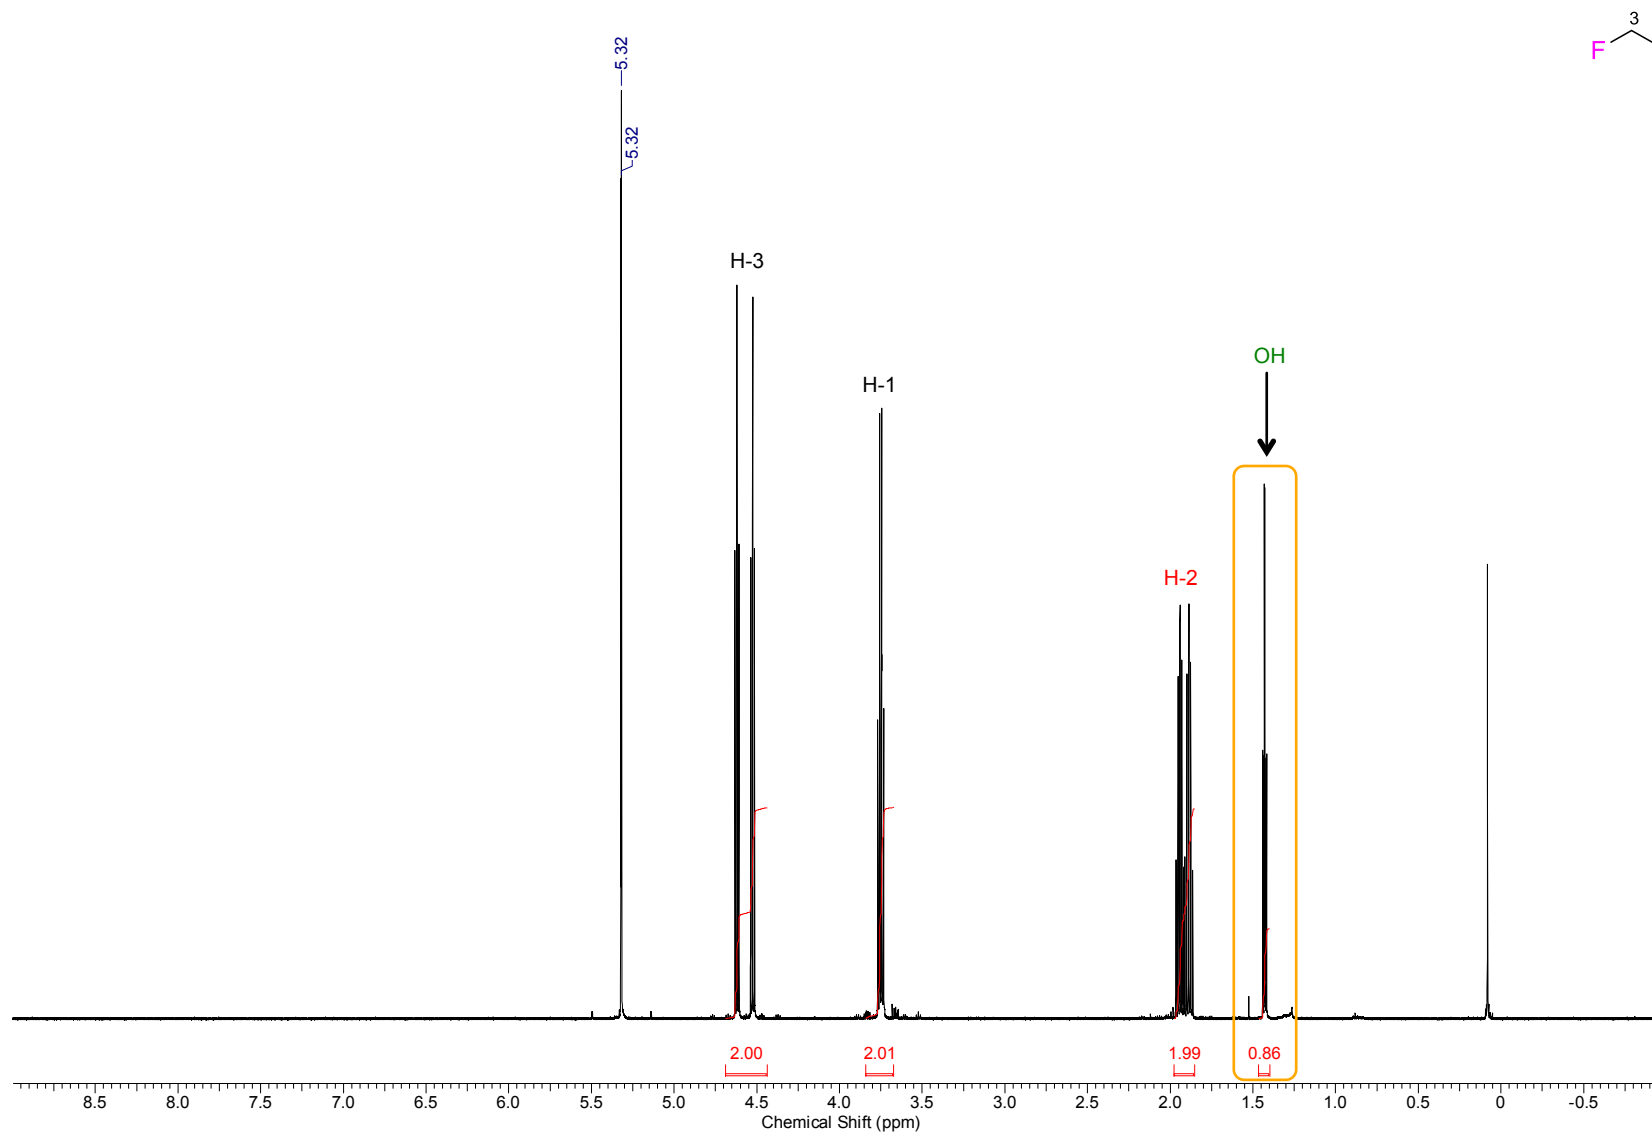

5.6.8 Detail of  $^1\text{H}$  and  $^1\text{H}\{^{19}\text{F}\}$  NMR of OH signal ( $\text{CD}_2\text{Cl}_2$ , 500 MHz, 25 °C) (D) $^1\text{H}\{^{19}\text{F}\}$  NMR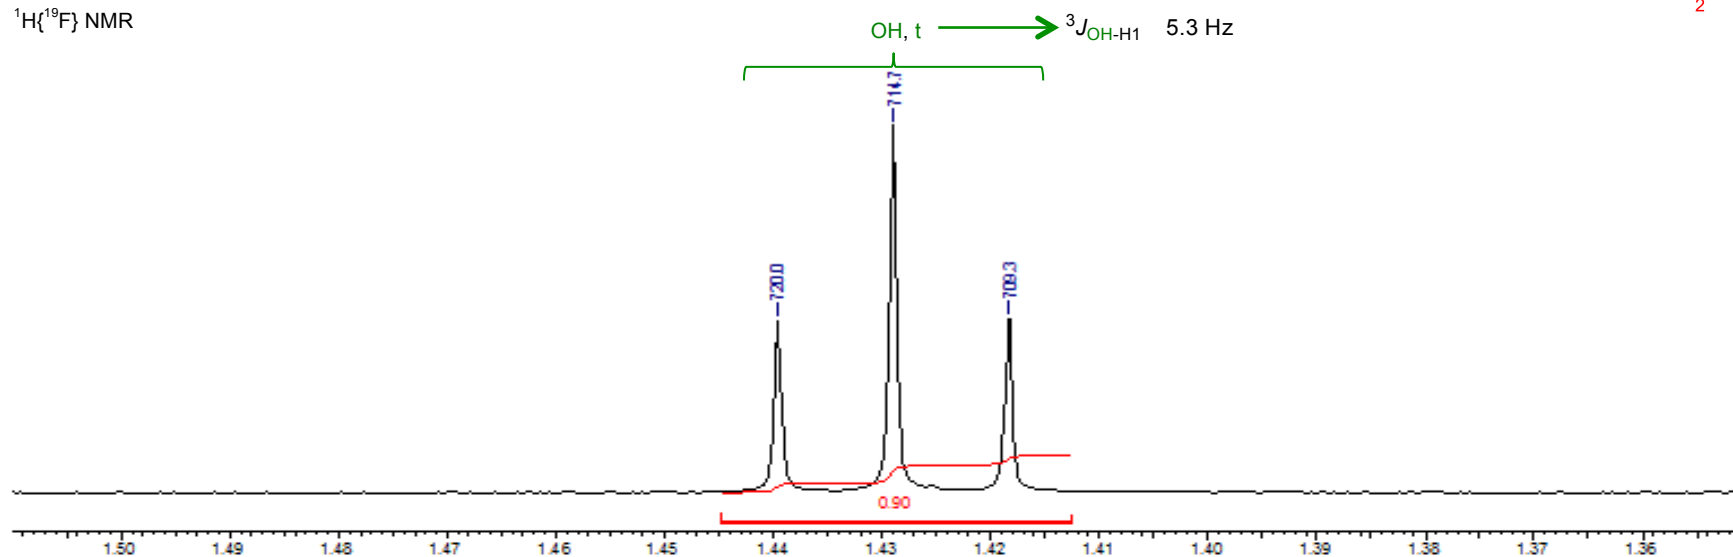 $^1\text{H}$  NMR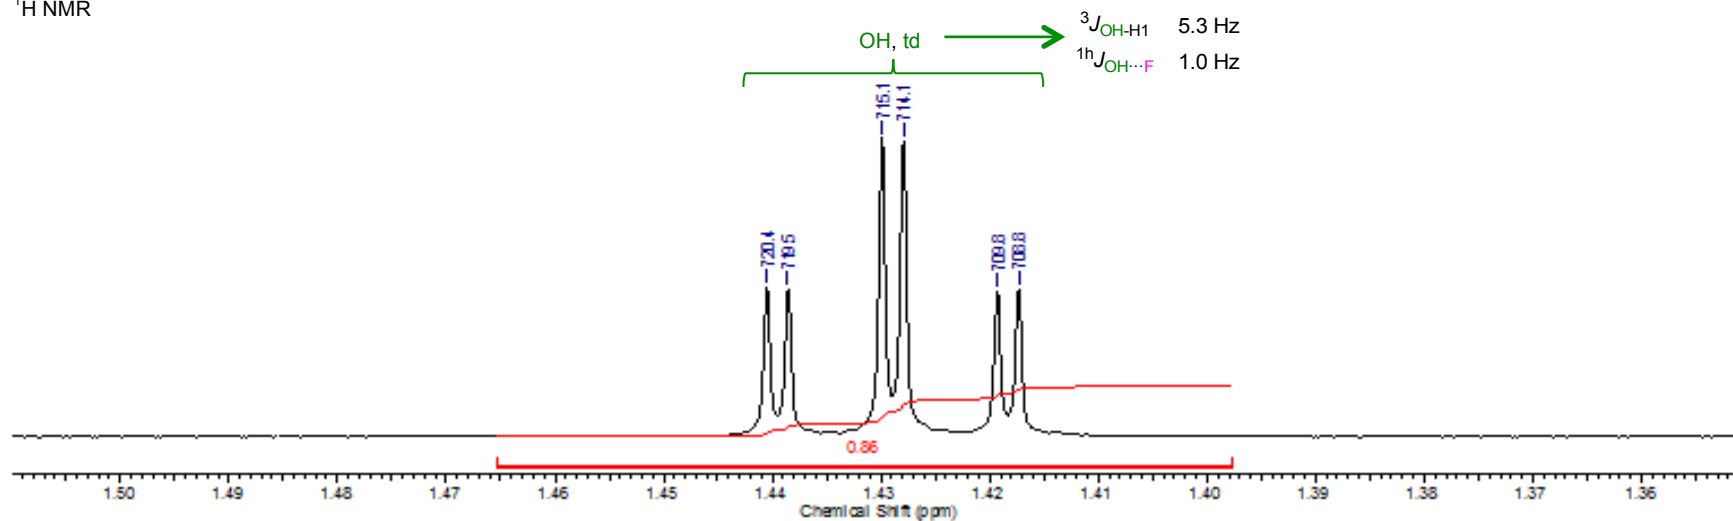

5.6.9  $^{19}\text{F}$  NMR spectrum ( $\text{CD}_2\text{Cl}_2$ , 470 MHz, 25 °C) (D)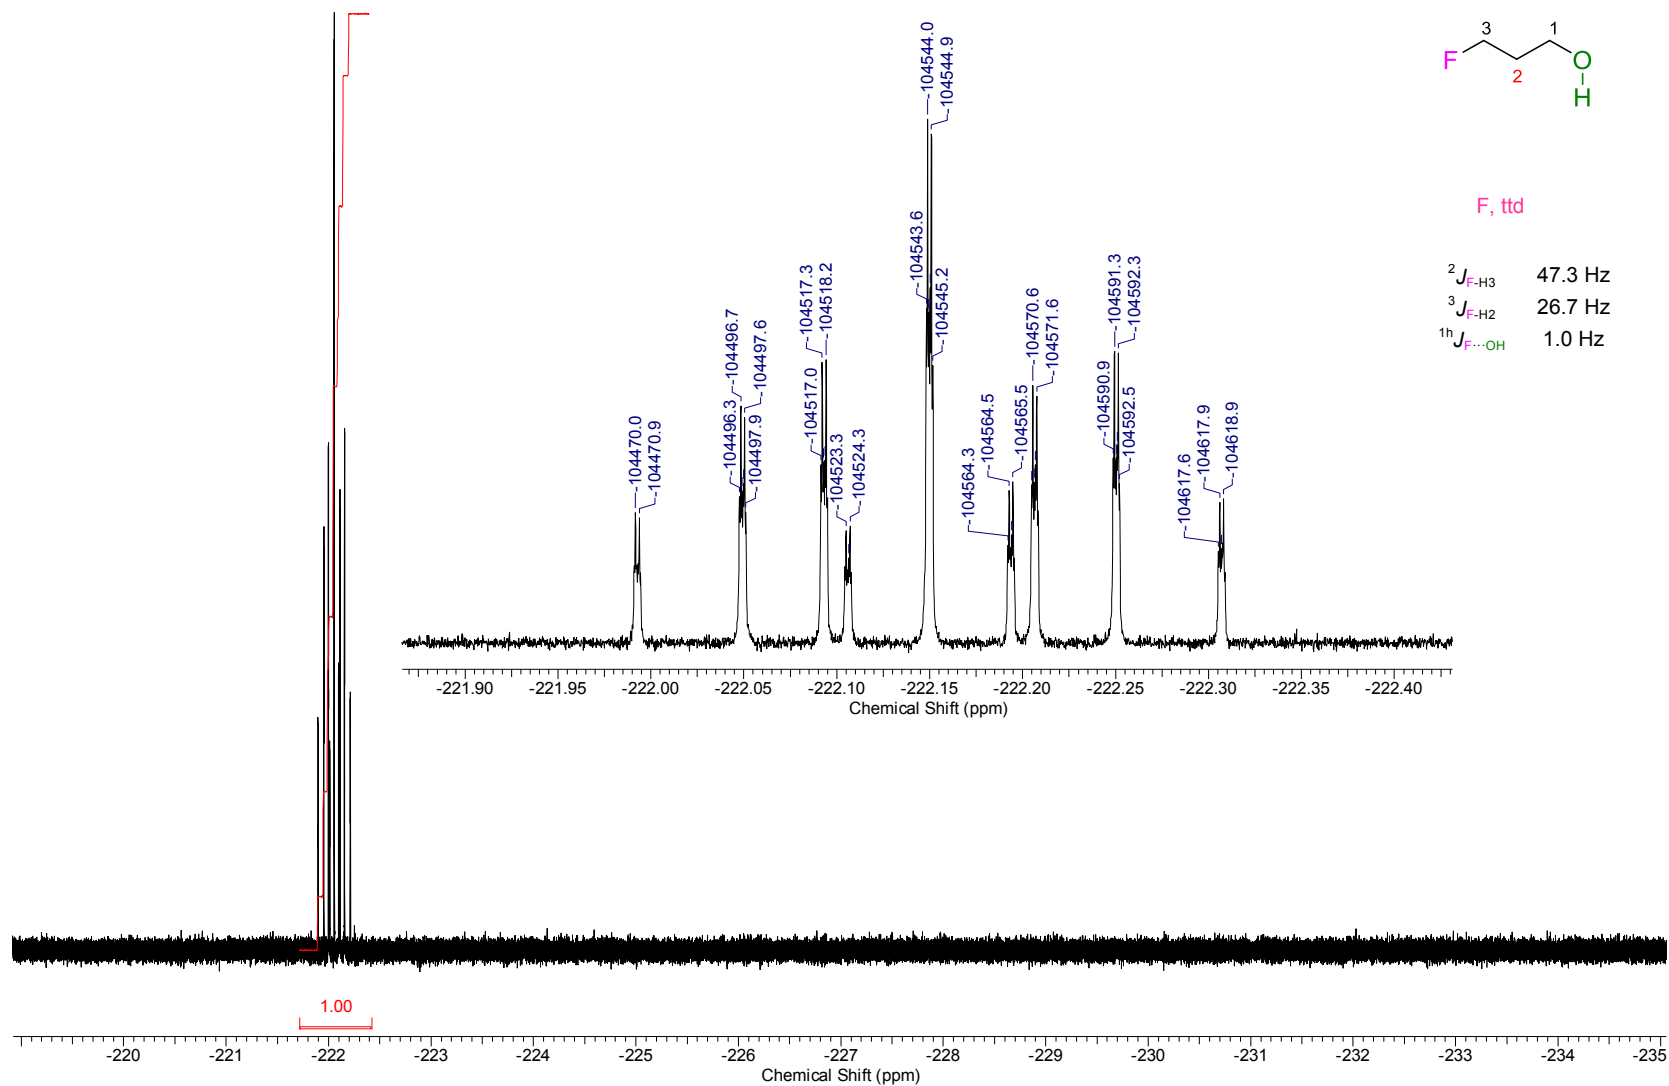

## 5.7 4,4-difluoropentan-2-ol (E)

5.7.1  $^1\text{H}$  NMR spectrum ( $\text{CDCl}_3$ , 500 MHz, 25 °C)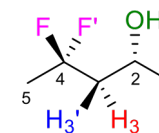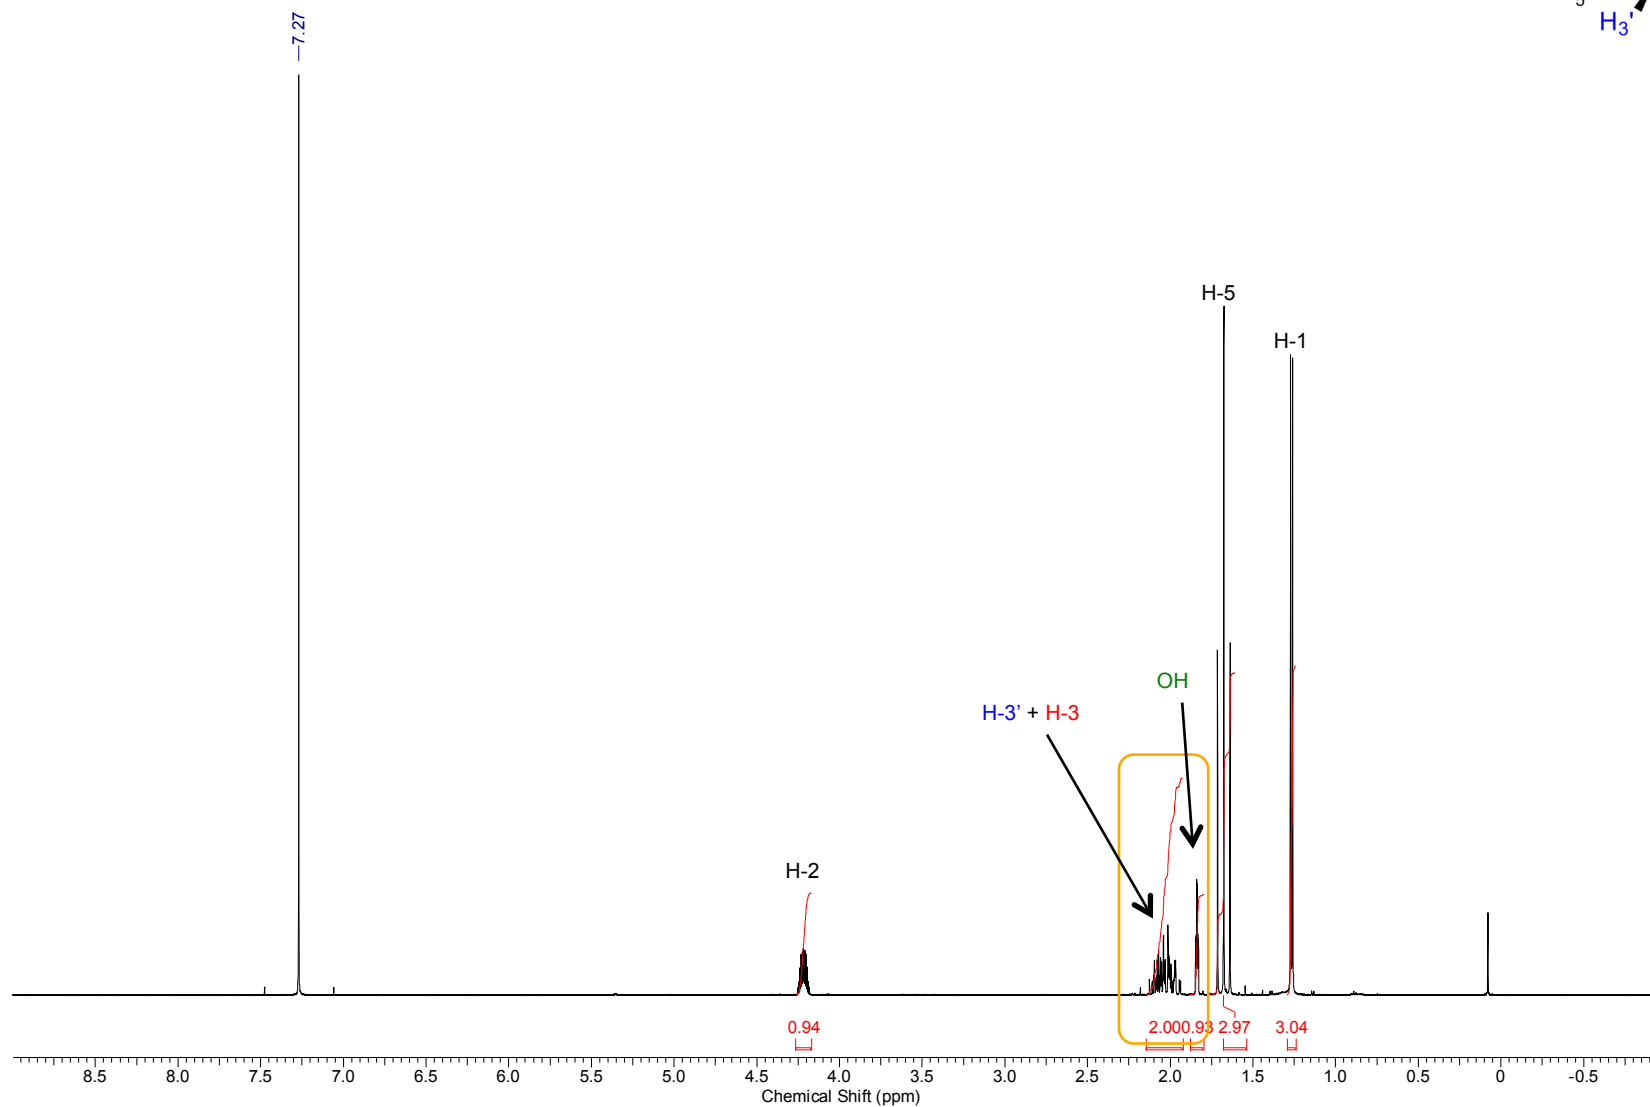

5.7.2 Detail of  $^1\text{H}$  and  $^1\text{H}[^{19}\text{F}]$  NMR of OH, H-3 and H-3' signals ( $\text{CDCl}_3$ , 500 MHz, 25 °C) (E) $^1\text{H}[^{19}\text{F}]$  NMR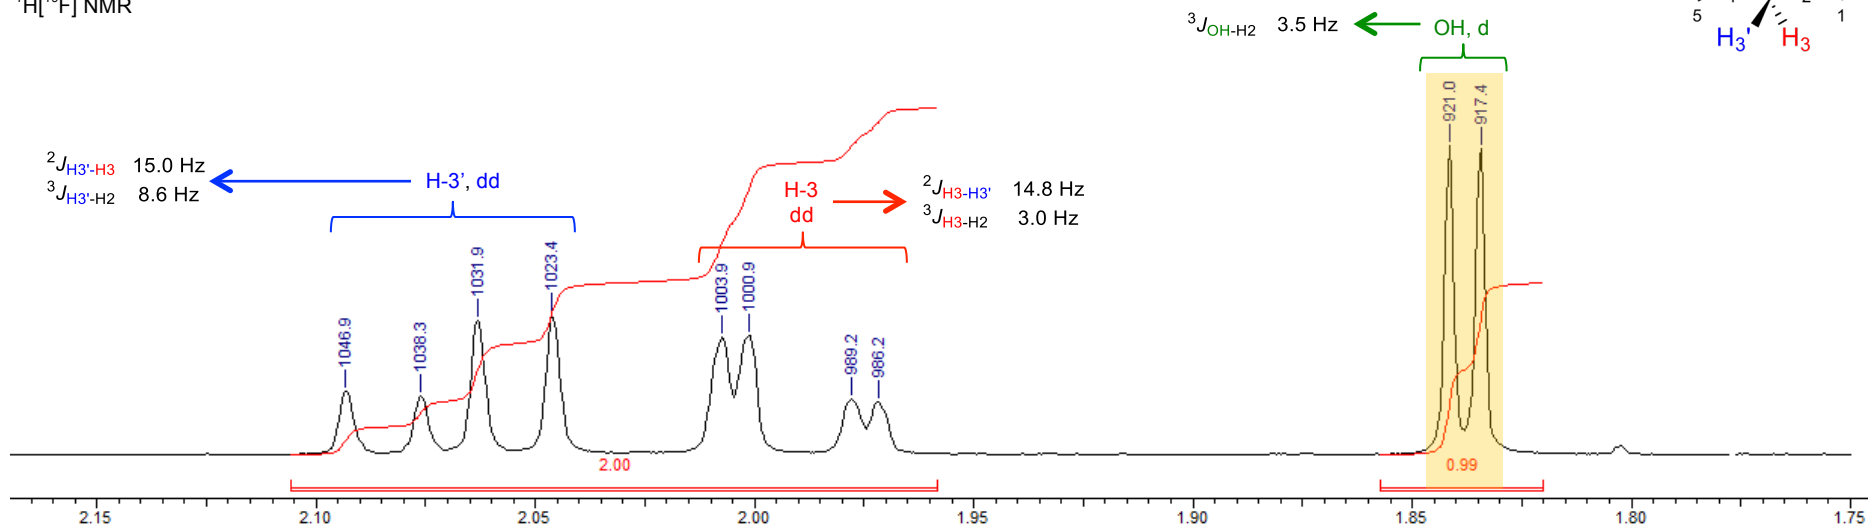 $^1\text{H}$  NMR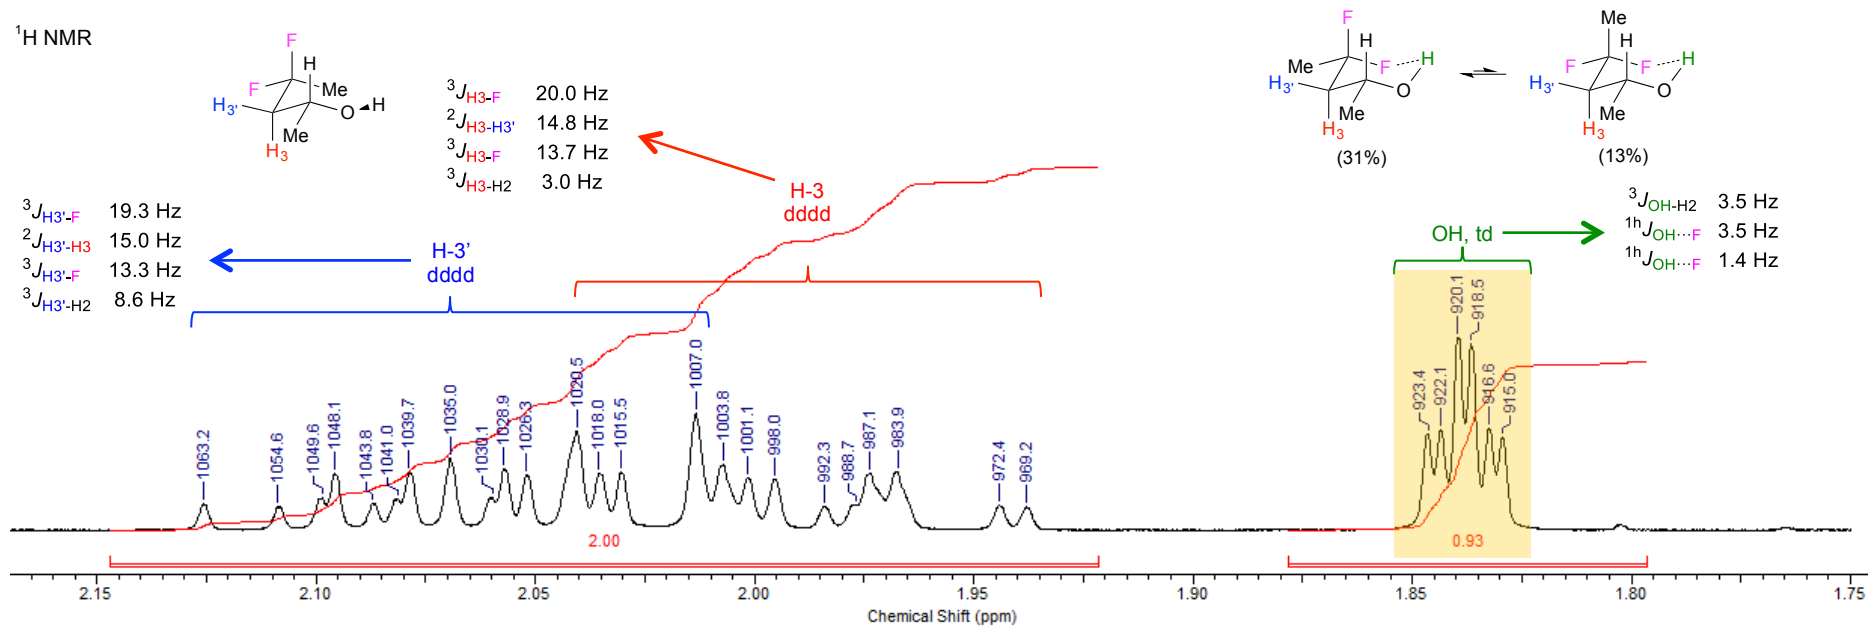



5.7.3 Homodecoupling of H-2 (CDCl<sub>3</sub>, 500 MHz, 25 °C) (E)<sup>1</sup>H NMR, Homodecoupling of H-2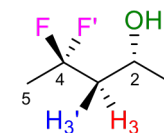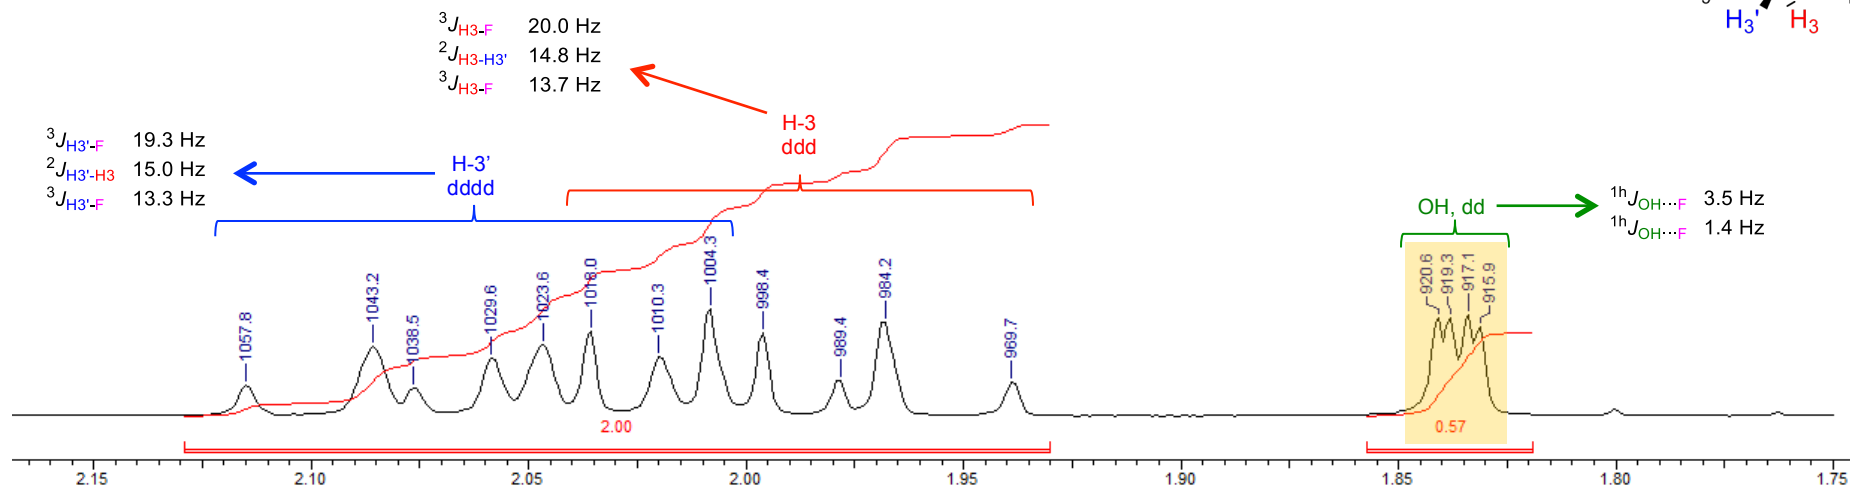<sup>1</sup>H NMR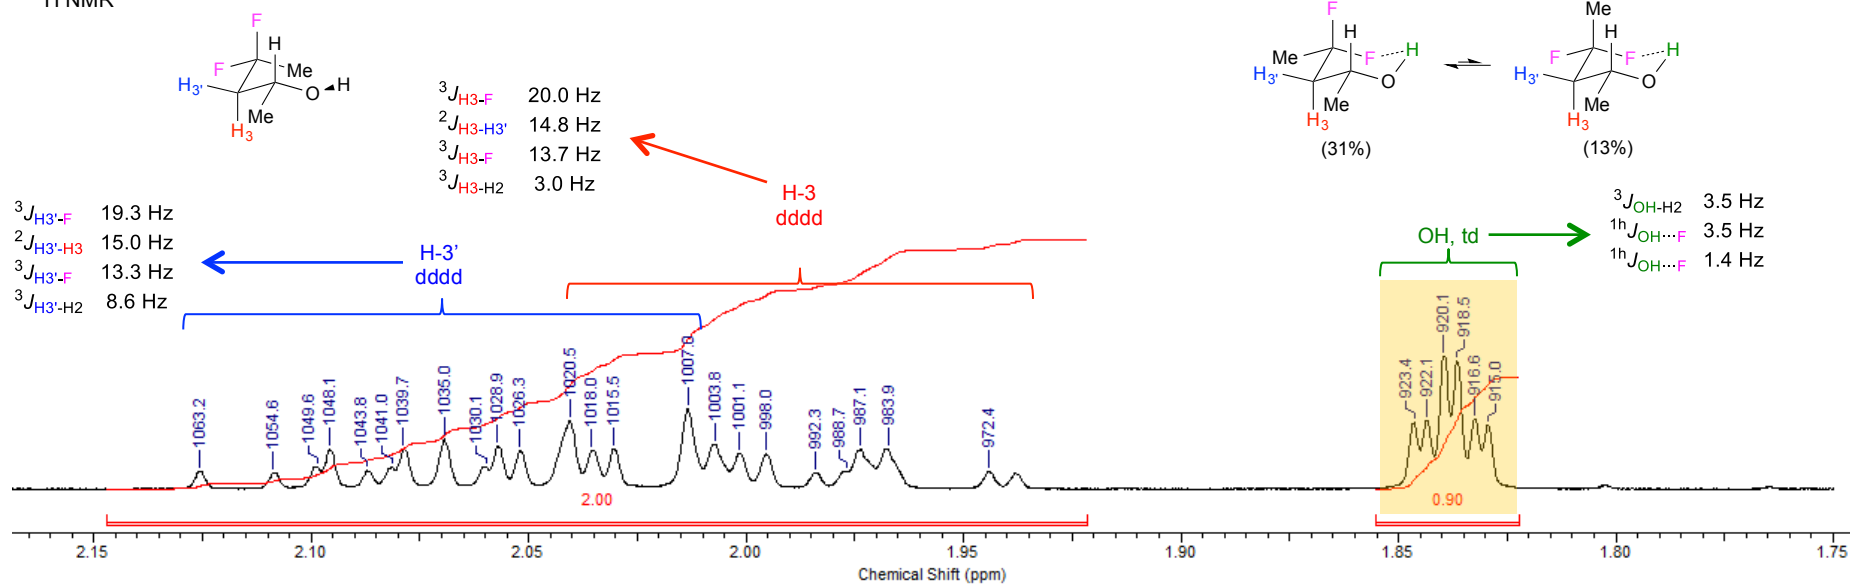

5.7.4 Comparison of  $^1\text{H}$  NMR of OH, H-3' and H-3 signal at 25 °C and -50 °C ( $\text{CDCl}_3$ , 500 MHz) (E)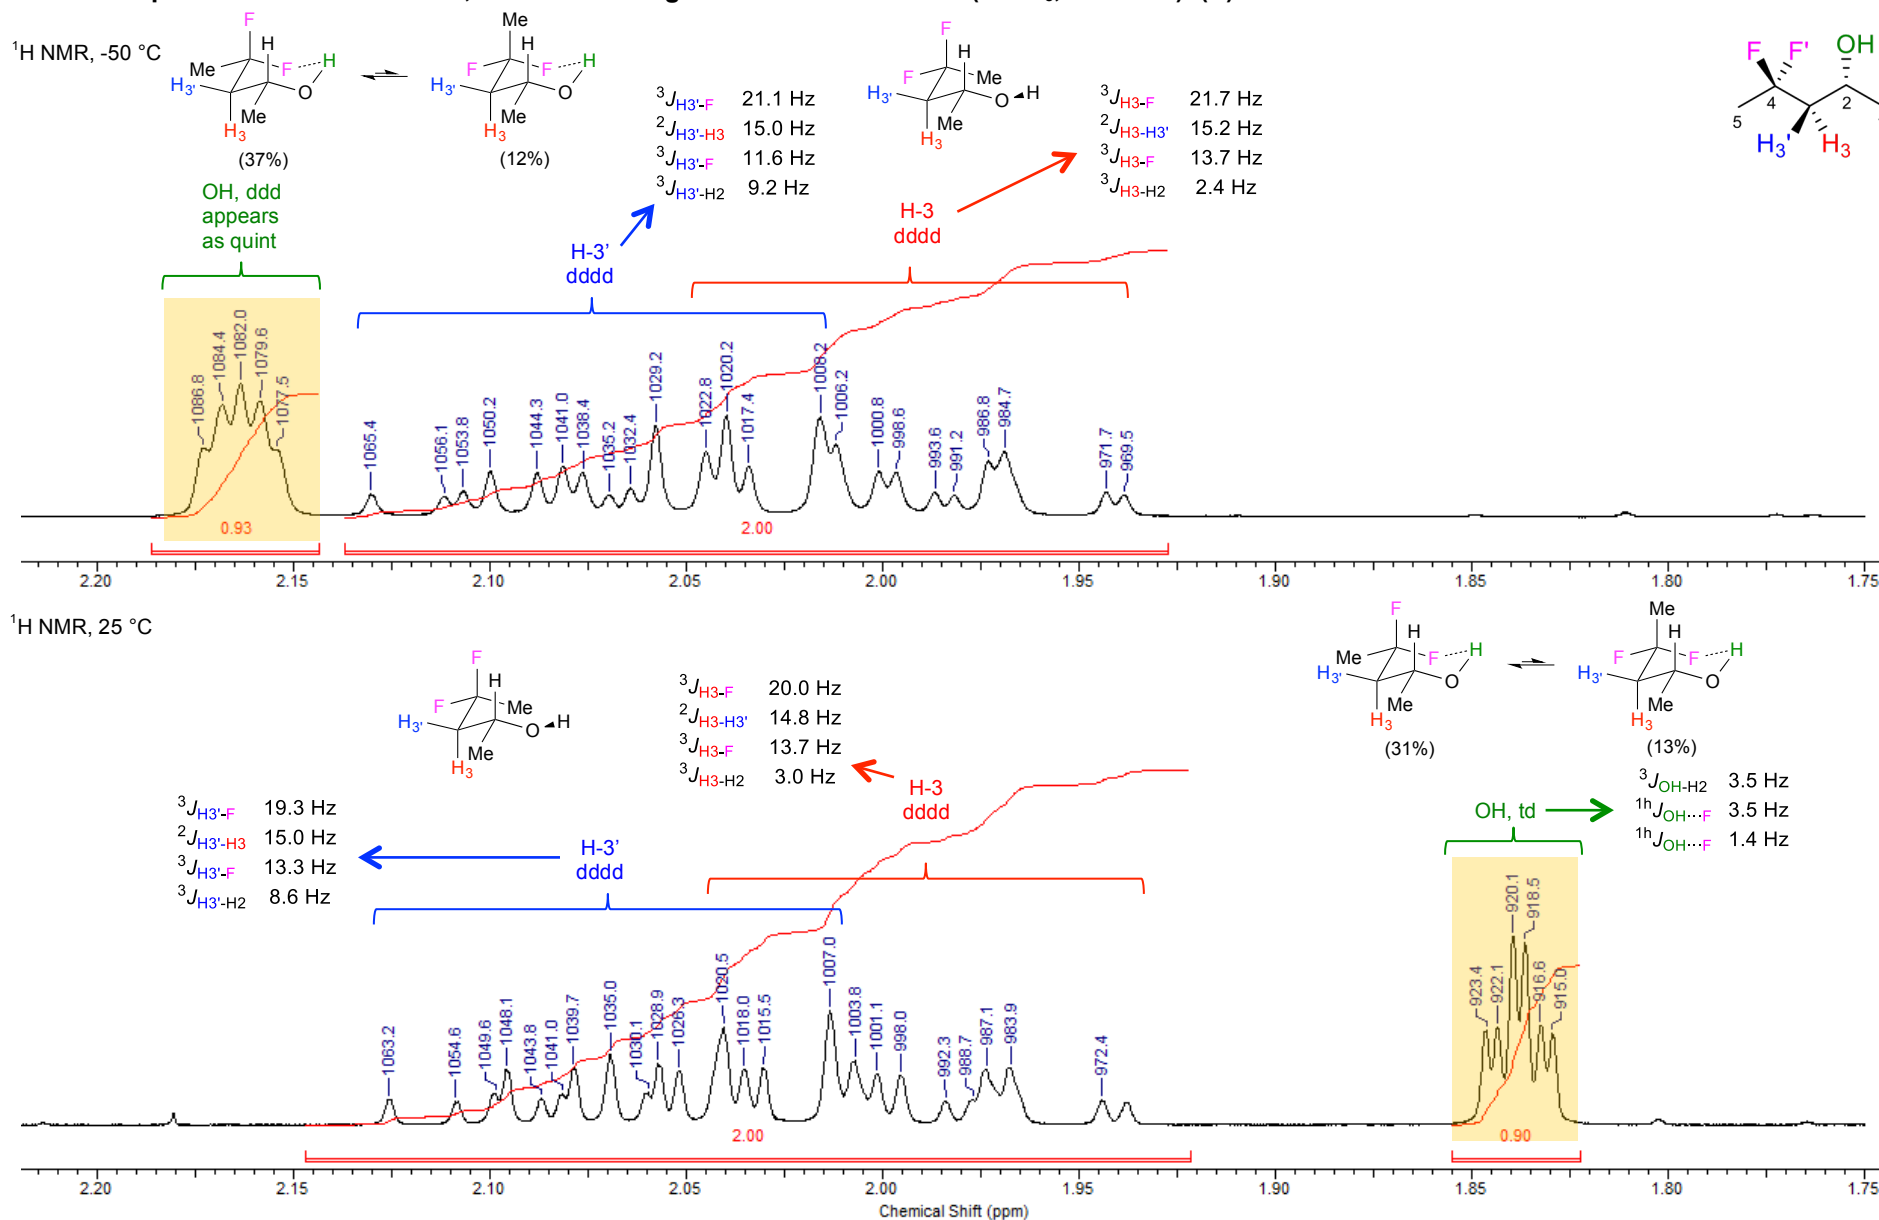

5.7.5 Detail of  $^1\text{H}$  and  $^1\text{H}\{^{19}\text{F}\}$  NMR of OH, H-3' and H-3 signals at  $-50\text{ }^\circ\text{C}$  ( $\text{CDCl}_3$ , 500 MHz) (E)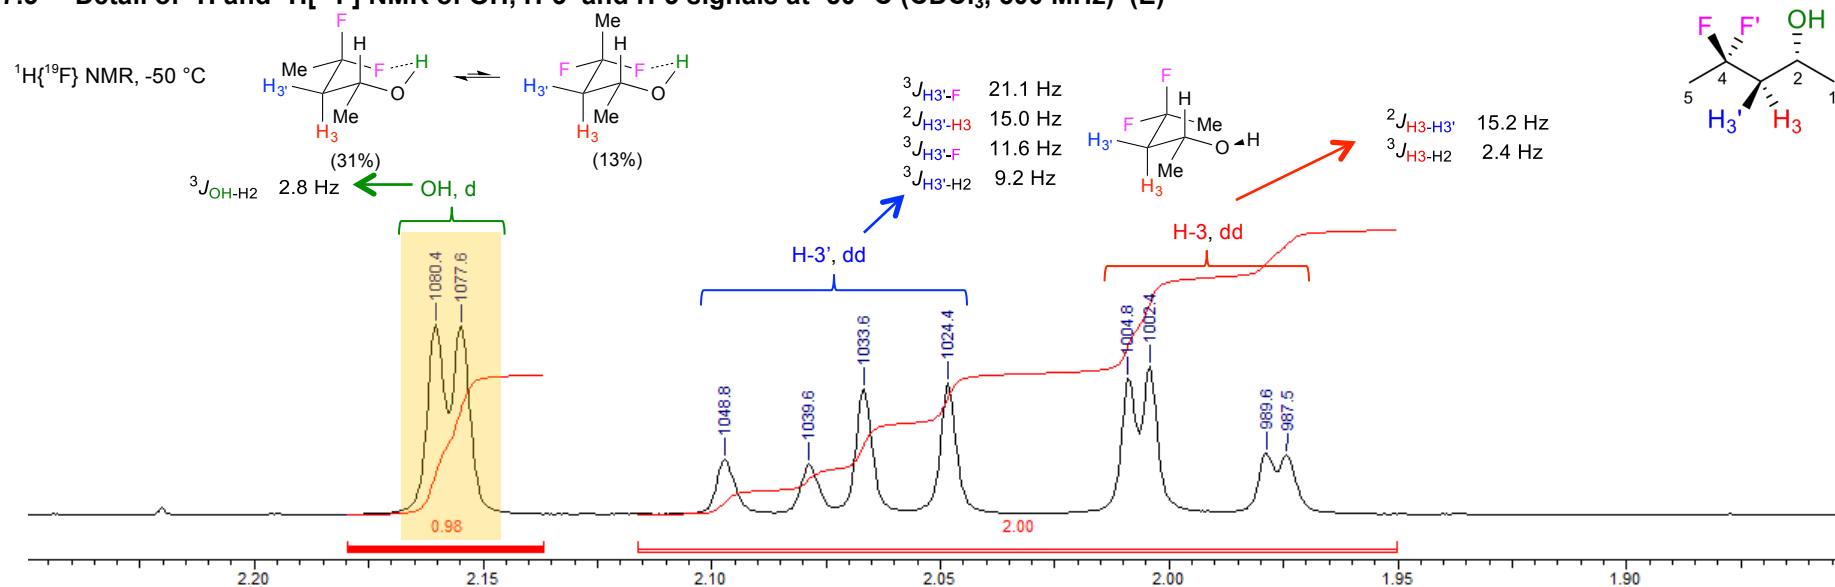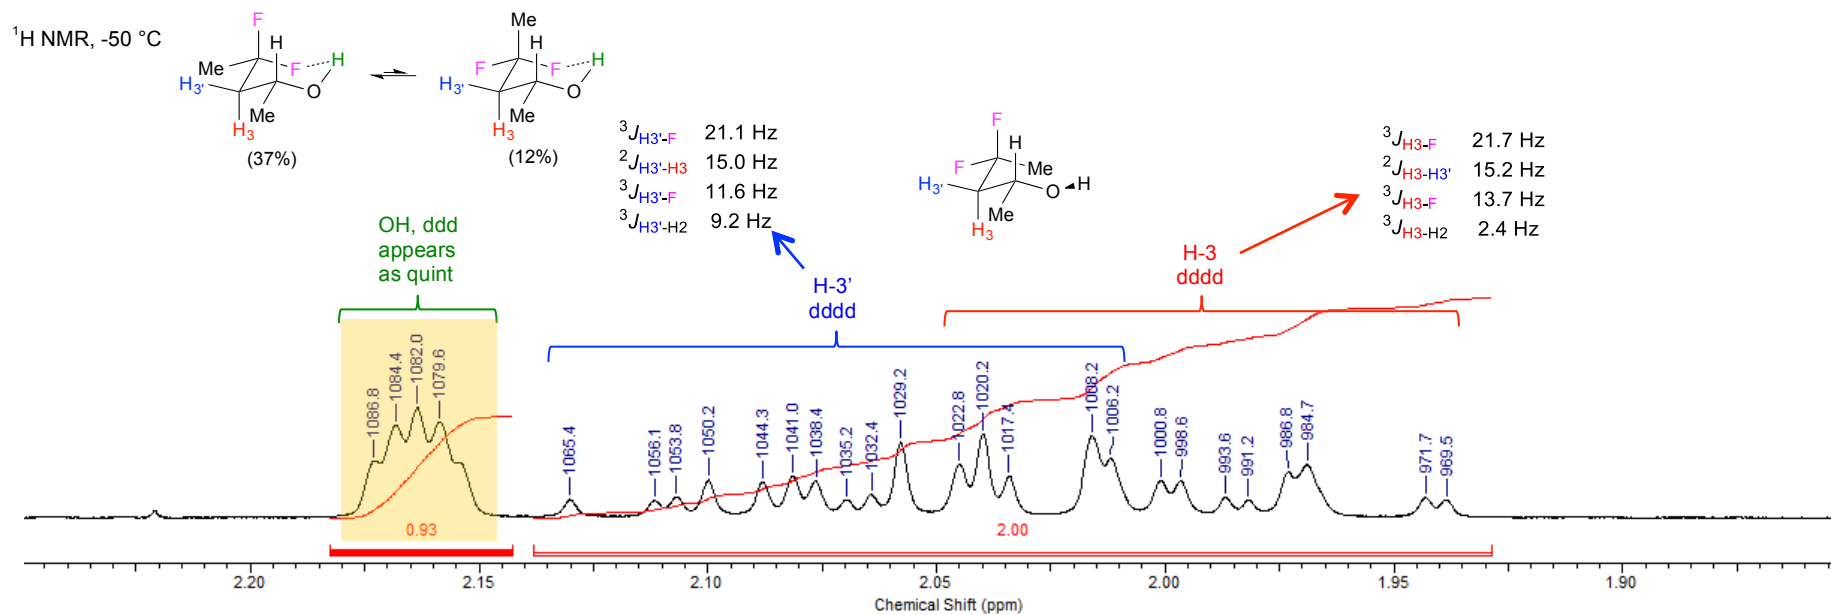

5.7.6 Homodecoupling of H-2 (CDCl<sub>3</sub>, 500 MHz, -50 °C) (E)<sup>1</sup>H NMR, Homodecoupling of H-2 at -50 °C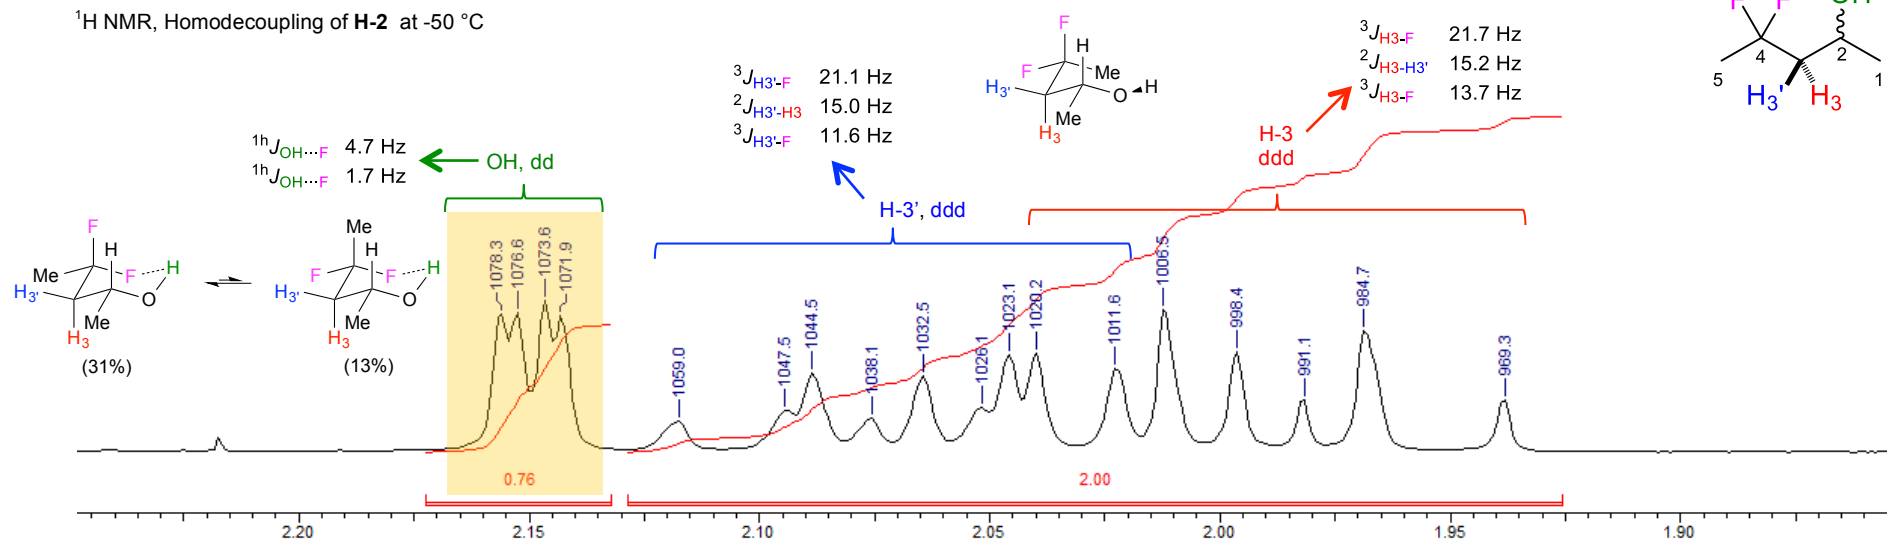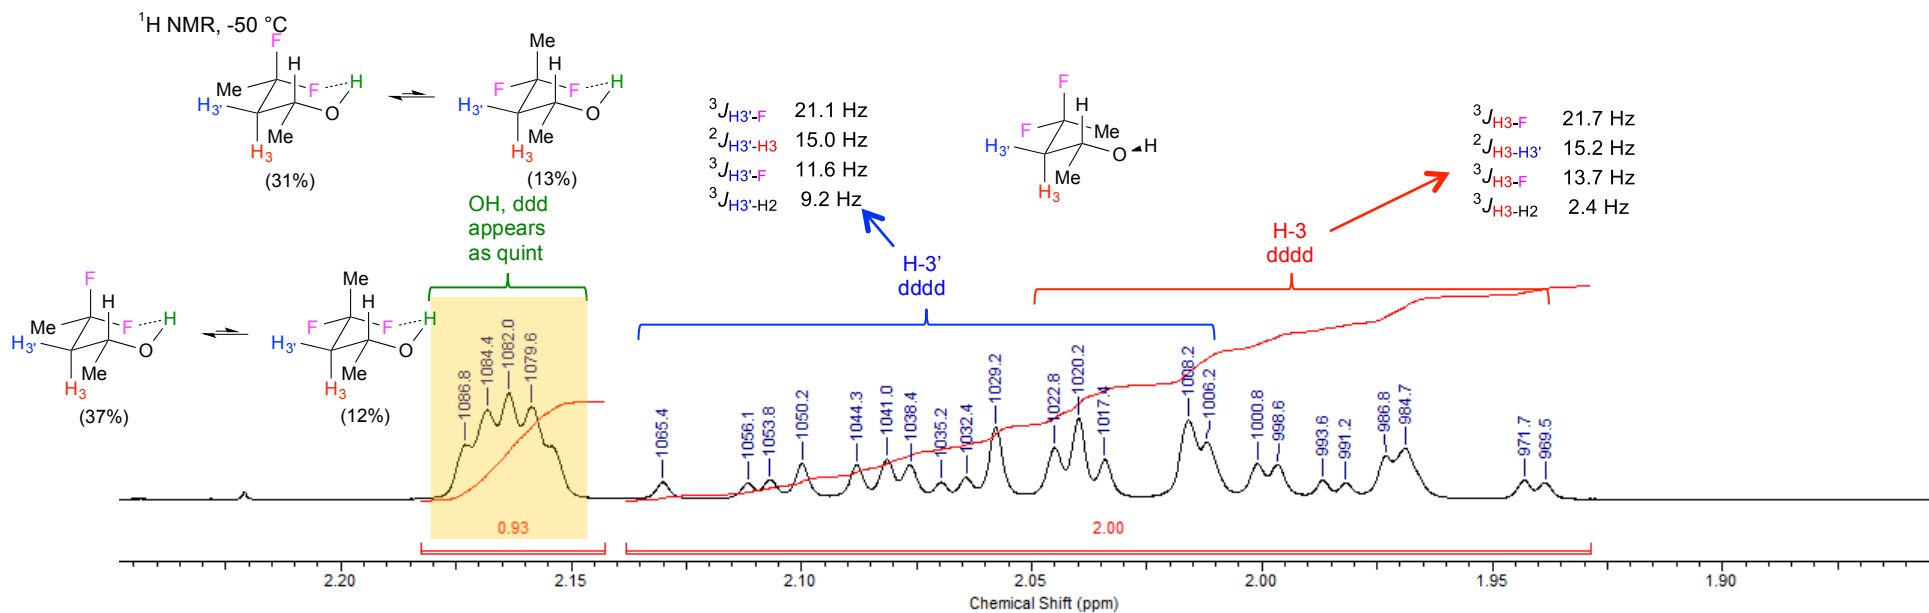



5.7.8  $^{19}\text{F}$  NMR spectrum ( $\text{CDCl}_3$ , 470 MHz,  $-50\text{ }^\circ\text{C}$ ) (E)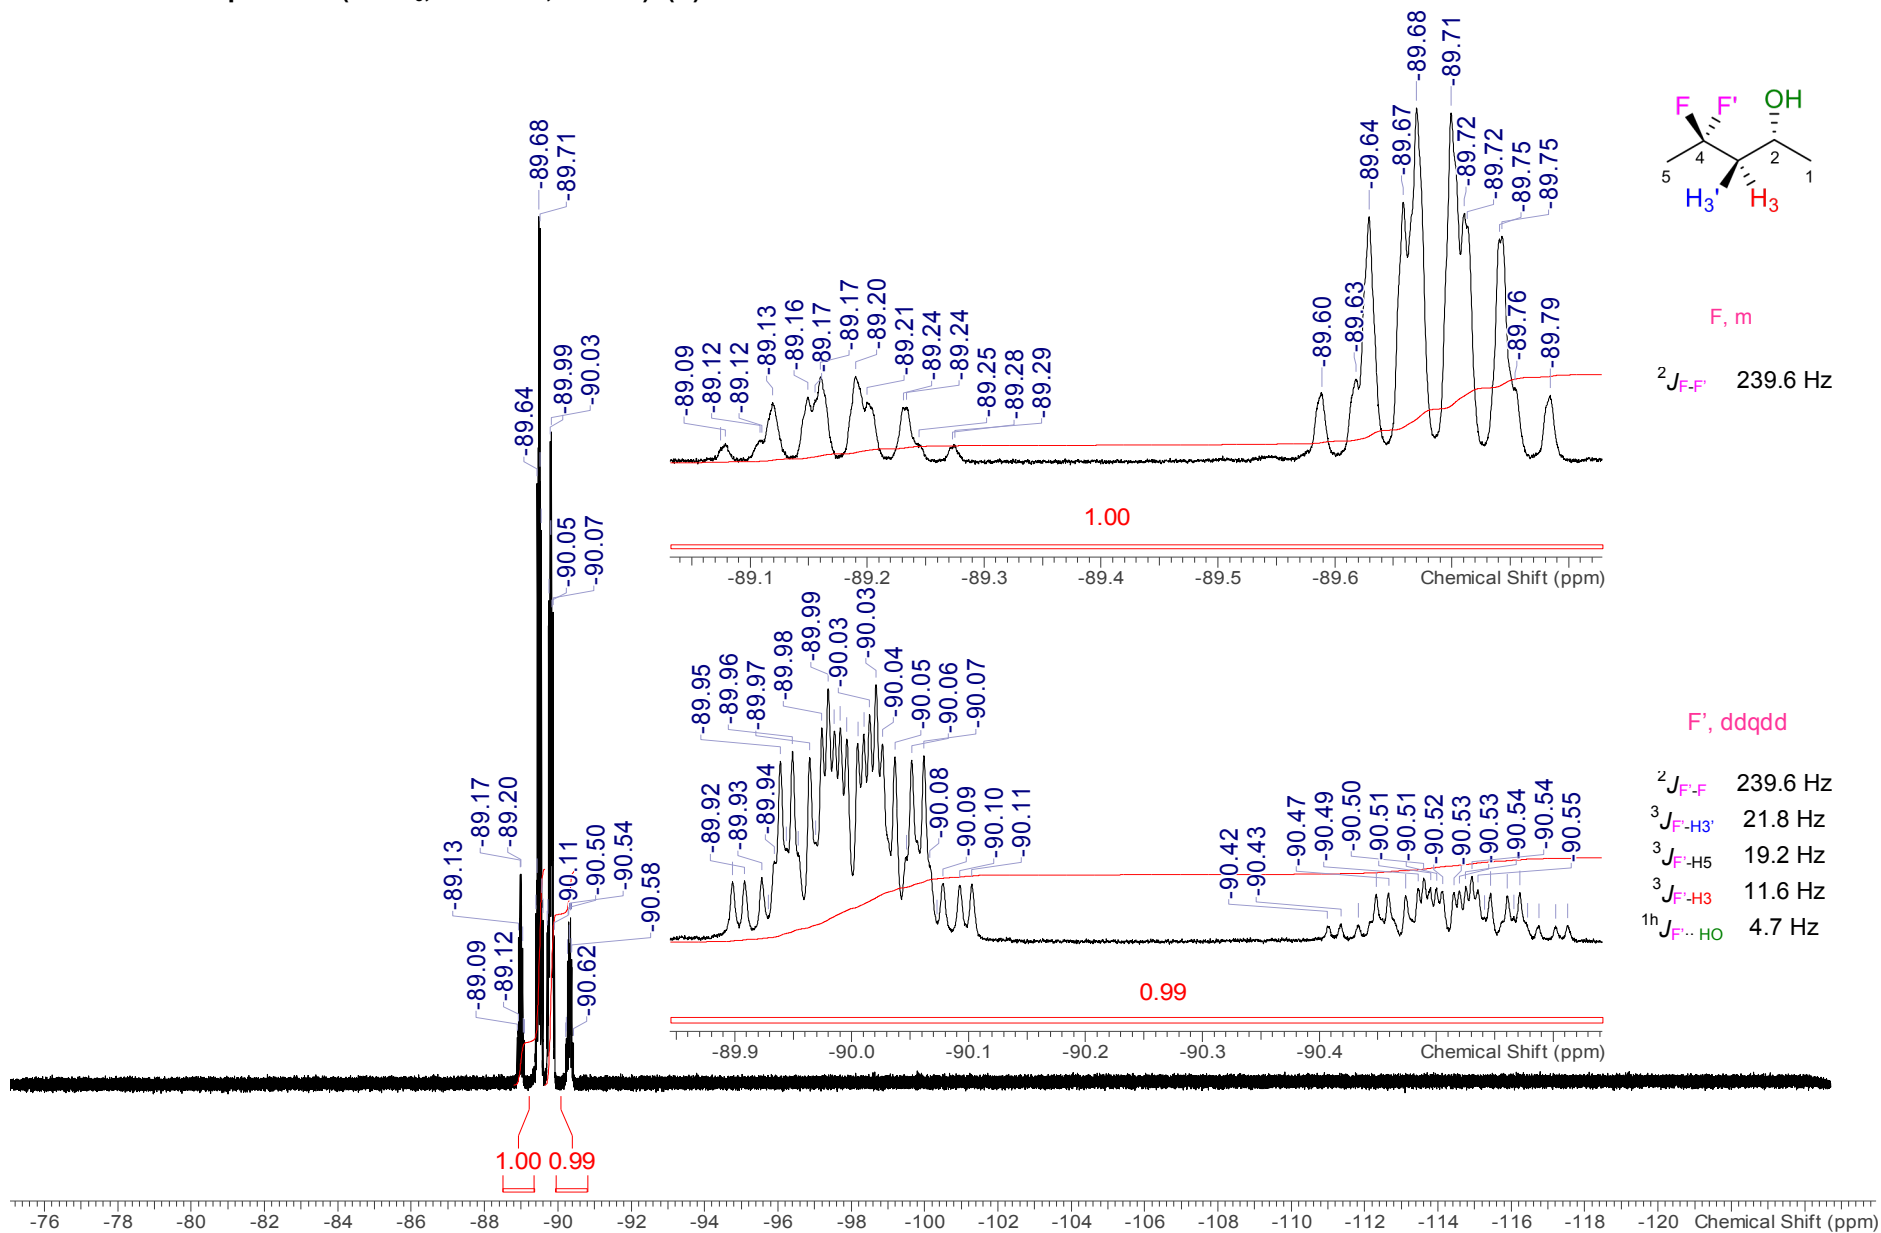

## 5.8 4,4-difluorobutan-2-ol (F)

5.8.1  $^1\text{H}$  NMR spectrum ( $\text{CDCl}_3$ , 500 MHz, 25 °C)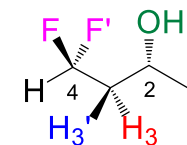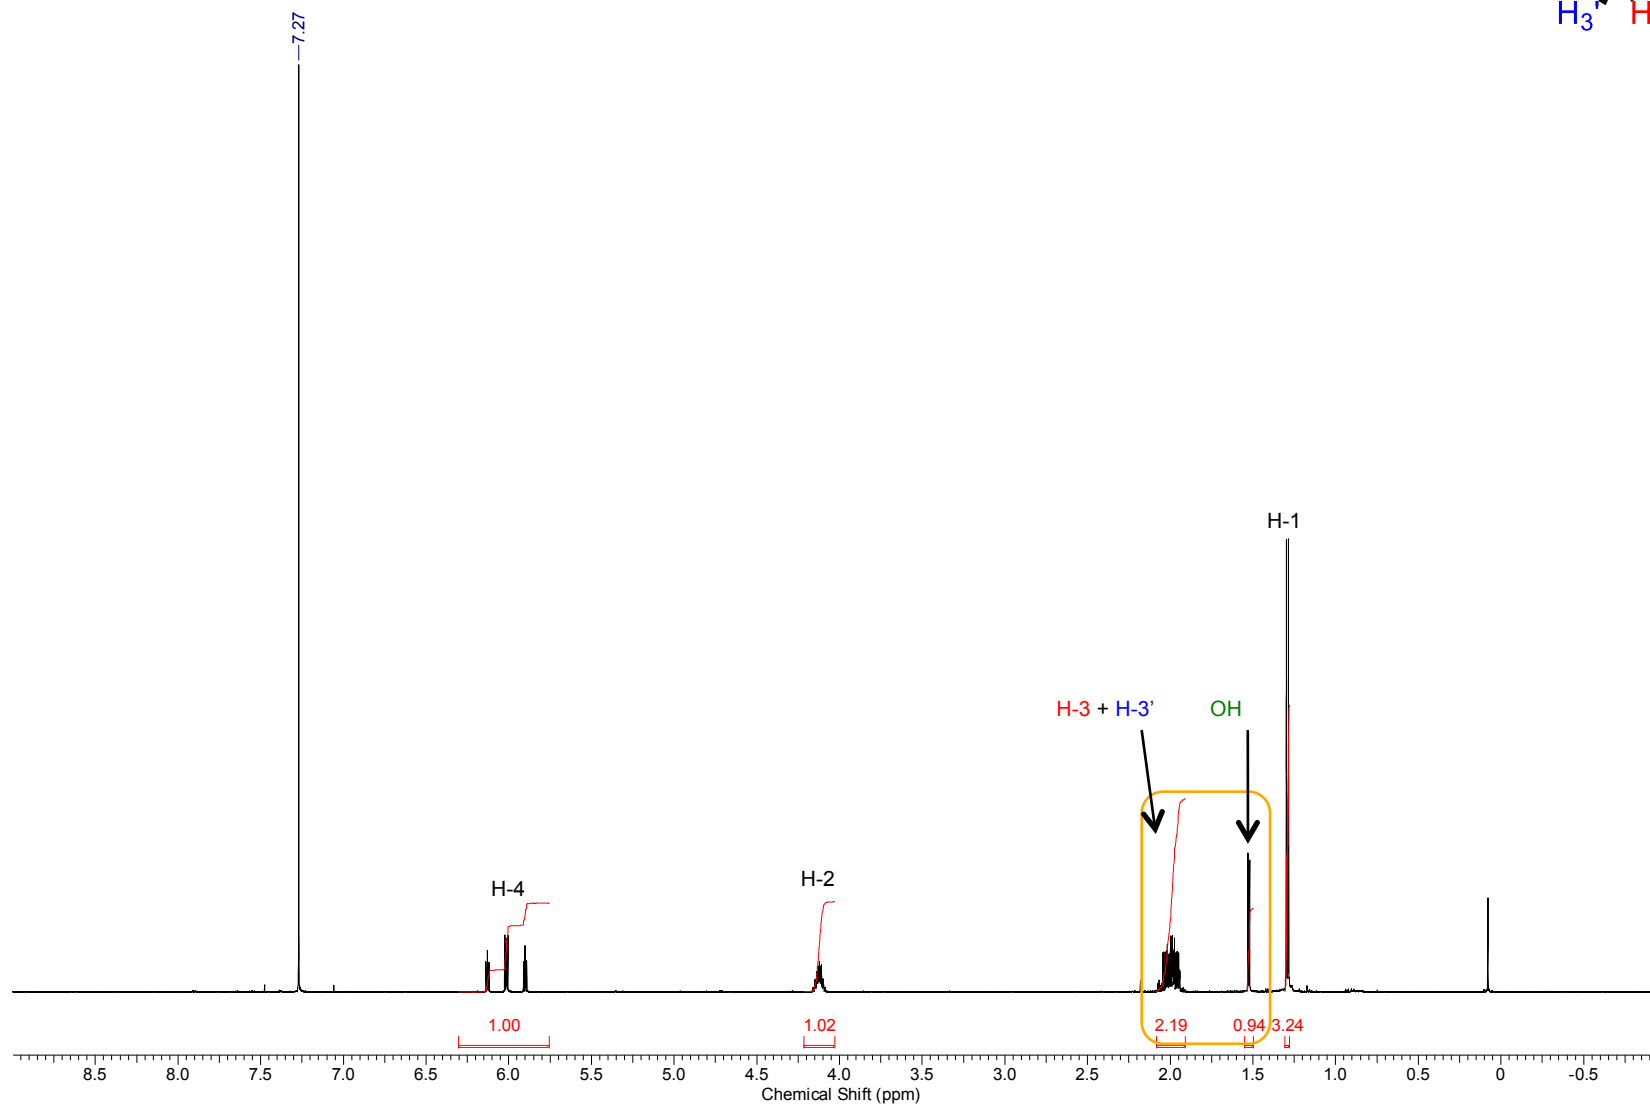

5.8.2 Detail of  $^1\text{H}$  and  $^1\text{H}\{^{19}\text{F}\}$  NMR of OH, H-3 and H-3' signals ( $\text{CDCl}_3$ , 500 MHz, 25 °C) (F) $^1\text{H}\{^{19}\text{F}\}$  NMR

- $^2J_{\text{H3-H3}'}$  14.5 Hz
- $^3J_{\text{H3-H2}}$  8.3 Hz
- $^3J_{\text{H3-H4}}$  3.6 Hz

← H-3, ddd

- $^2J_{\text{H3'-H3}}$  14.5 Hz
- $^3J_{\text{H3'-H4}}$  5.5 Hz
- $^3J_{\text{H3'-H2}}$  4.4 Hz
- $^3J_{\text{H3'-OH}}$  0.5 Hz

→ H-3', dddd

- $^3J_{\text{OH-H2}}$  4.5 Hz
- $^3J_{\text{OH-H3}'}$  0.5 Hz

← OH, dd

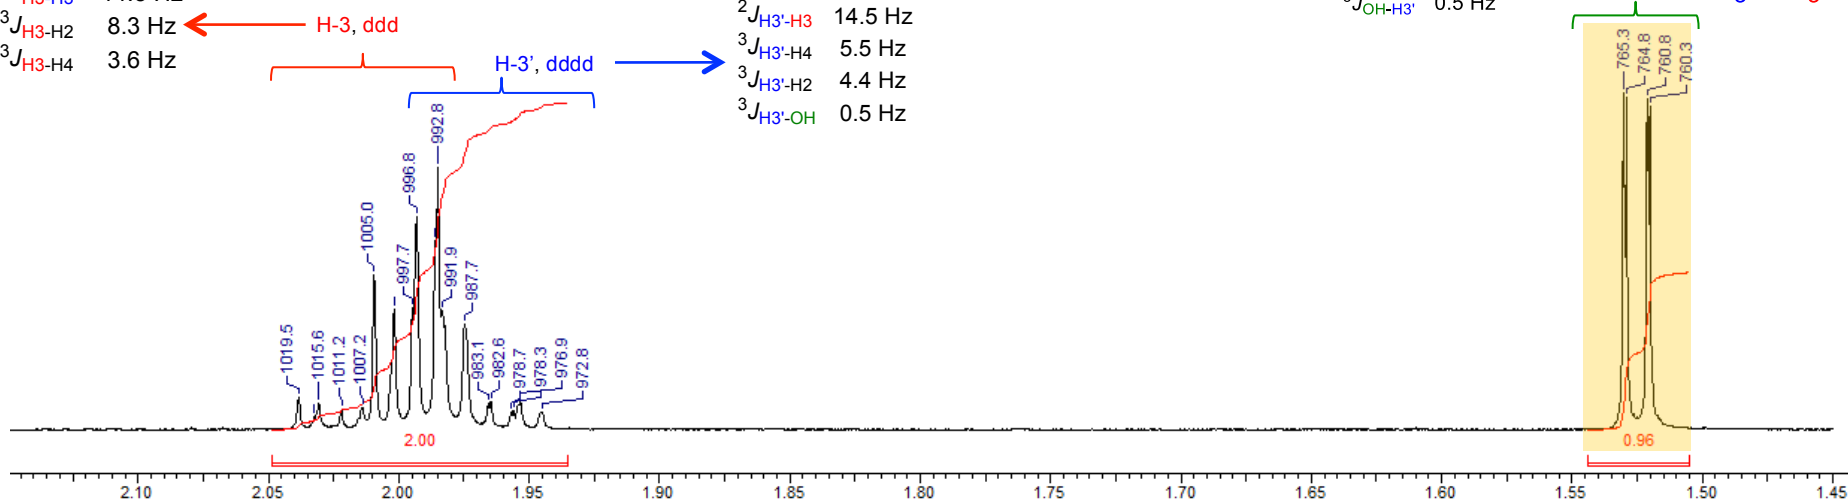 $^1\text{H}$  NMR

- $^3J_{\text{H3-F}}$  20.9 Hz
- $^2J_{\text{H3-H3}'}$  14.5 Hz
- $^3J_{\text{H3-F}}$  14.5 Hz
- $^3J_{\text{H3-H2}}$  8.4 Hz
- $^3J_{\text{H3-H4}}$  3.6 Hz

← H-3, dtddd

- $^3J_{\text{H3'-F}}$  16.3 Hz
- $^2J_{\text{H3'-H3}}$  14.5 Hz
- $^3J_{\text{H3'-F}}$  14.5 Hz
- $^3J_{\text{H3'-H4}}$  5.5 Hz
- $^3J_{\text{H3'-H2}}$  4.4 Hz
- $^3J_{\text{H3'-OH}}$  0.5 Hz

→ H-3', dtddd

- $^3J_{\text{OH-H2}}$  4.5 Hz
- $^3J_{\text{OH-H3}'}$  0.6 Hz
- $^1h_{\text{OH}\cdots\text{F}}$  0.6 Hz
- $^1h_{\text{OH}\cdots\text{F}}$  0.6 Hz

← OH, dddd appears as dq

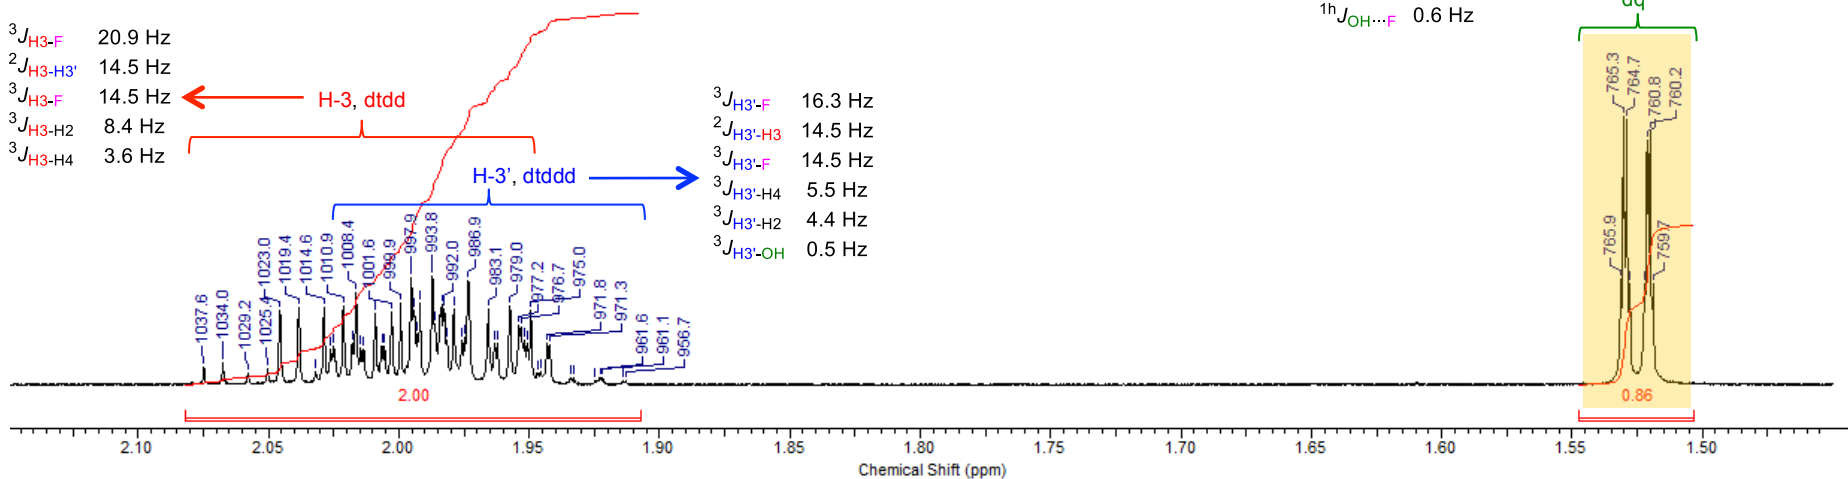



5.8.3 Detail of  $^1\text{H}$  and  $^1\text{H}\{^{19}\text{F}\}$  NMR of OH signal ( $\text{CDCl}_3$ , 500 MHz, 25 °C) (F)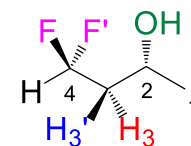 $^1\text{H}\{^{19}\text{F}\}$  NMR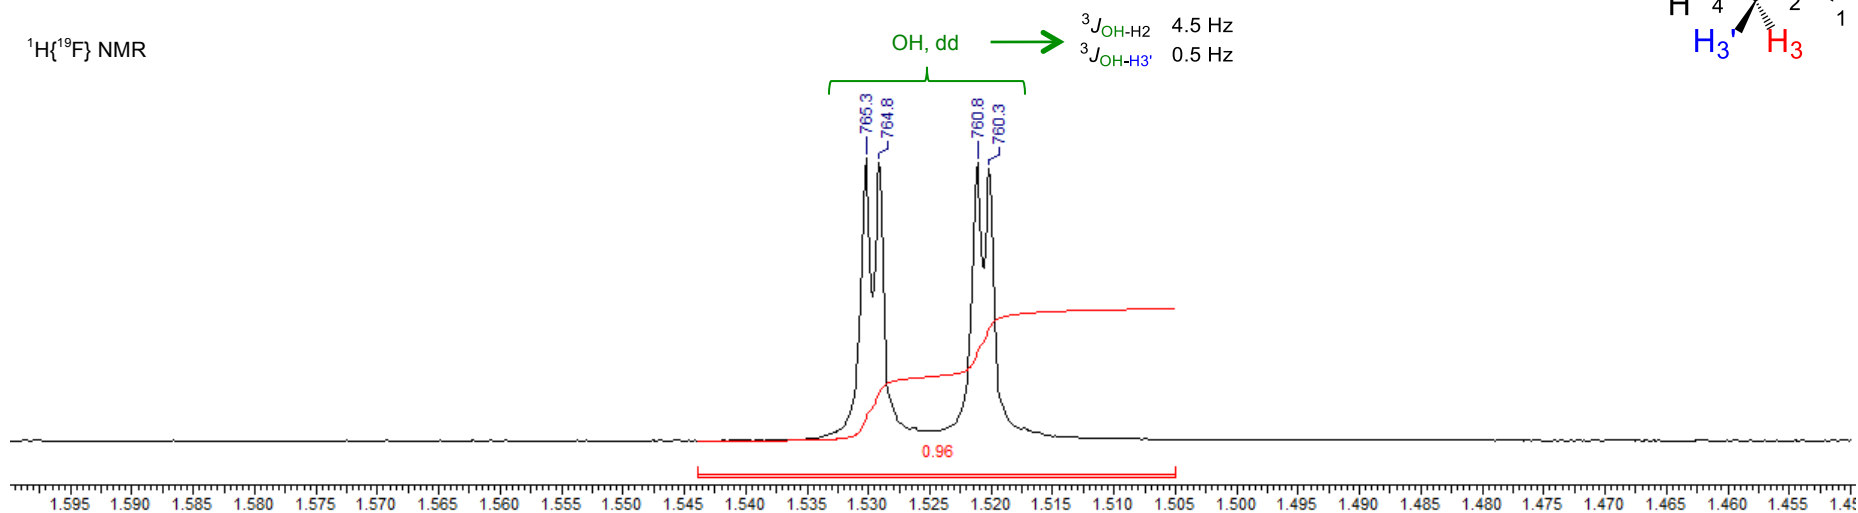 $^1\text{H}$  NMR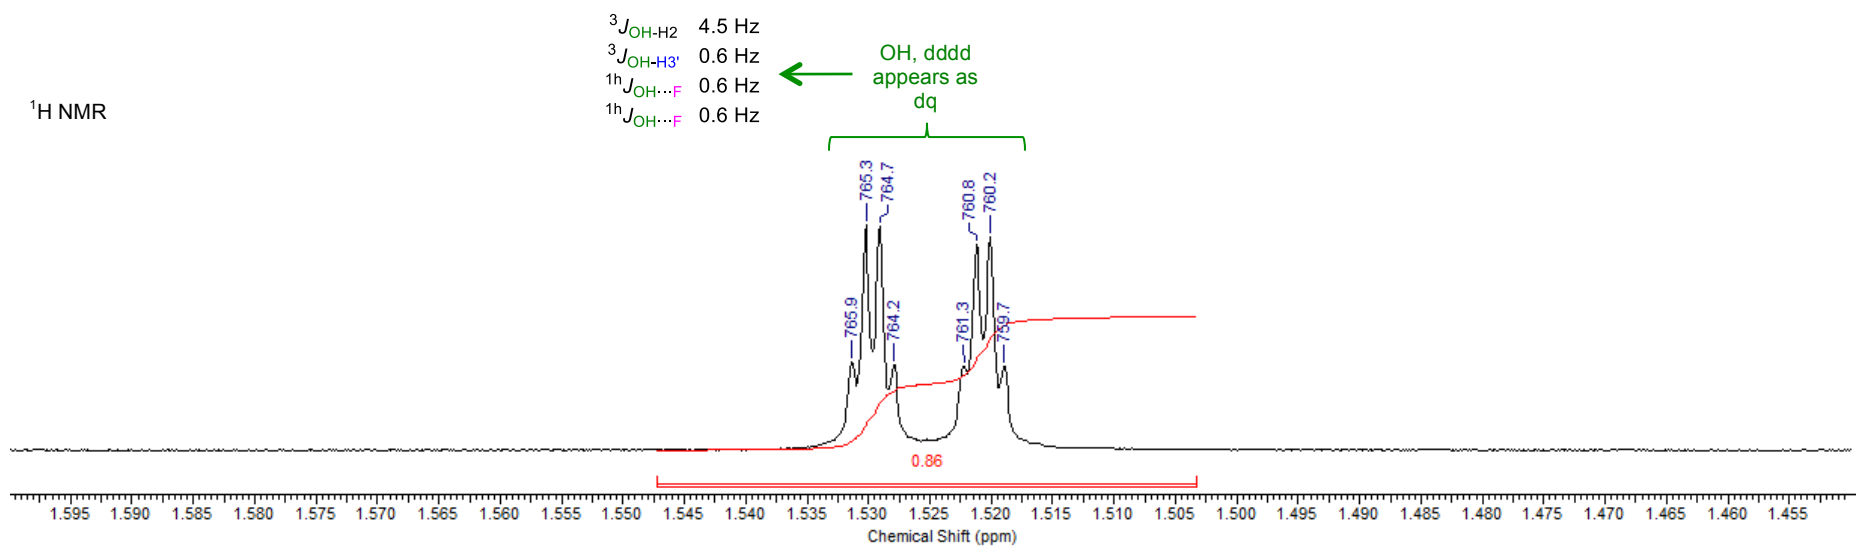

5.8.4  $^{19}\text{F}$  NMR spectrum ( $\text{CDCl}_3$ , 470 MHz, 25 °C) (F)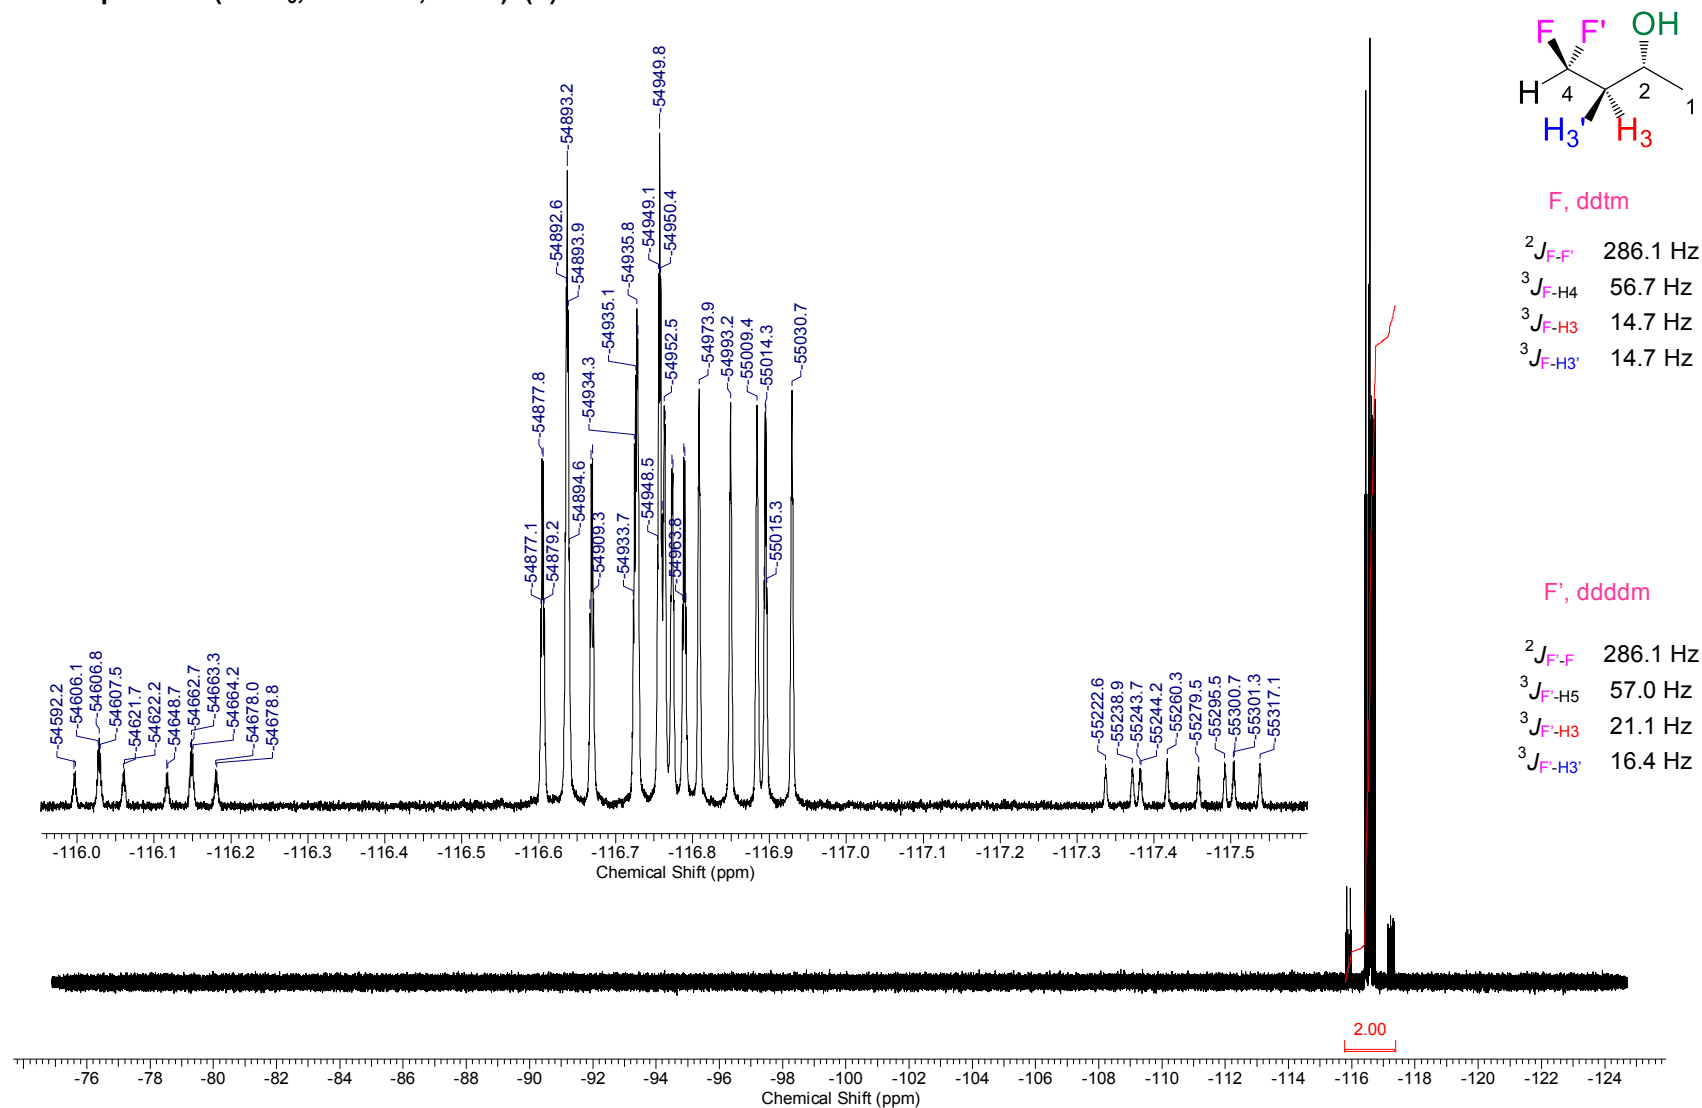

## 5.9 3,3-difluoropropan-1-ol (G)

5.9.1  $^1\text{H}$  NMR spectrum ( $\text{CDCl}_3$ , 500 MHz, 25 °C)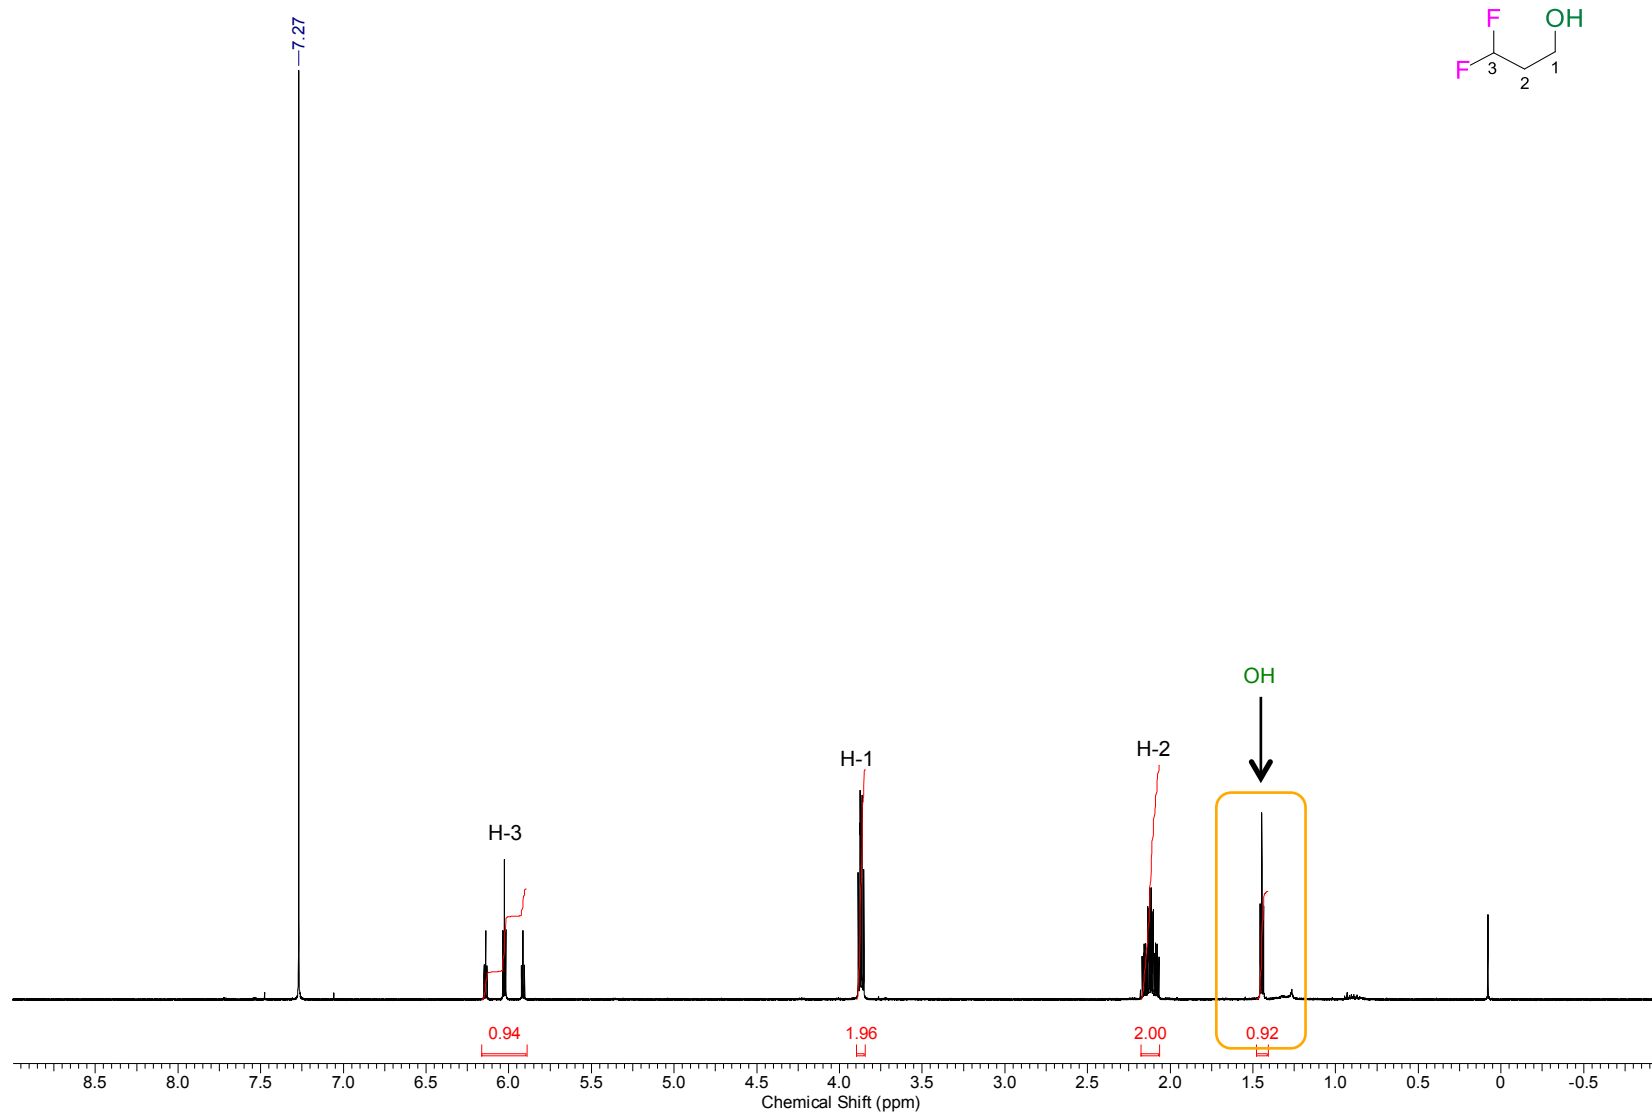

5.9.2 Detail of  $^1\text{H}$  and  $^1\text{H}\{^{19}\text{F}\}$  NMR of OH signal ( $\text{CDCl}_3$ , 500 MHz, 25 °C) (G)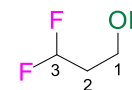 $^1\text{H}\{^{19}\text{F}\}$  NMR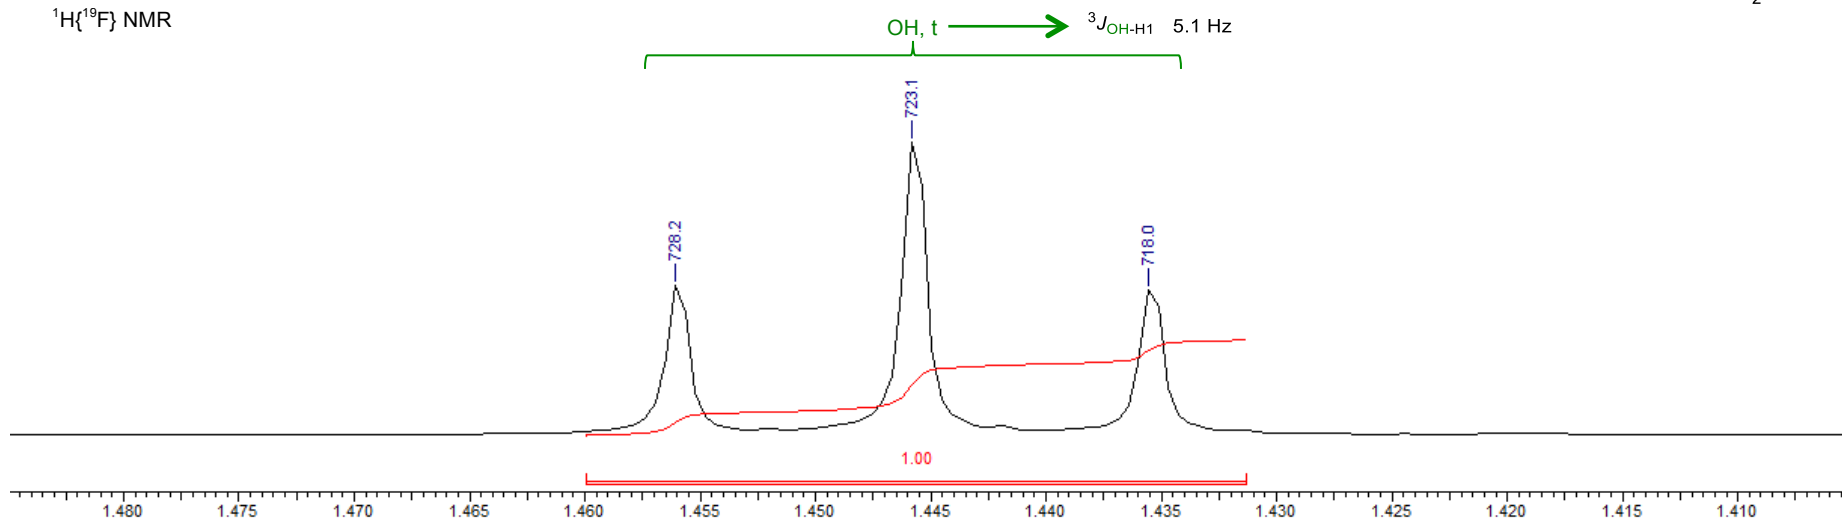 $^1\text{H}$  NMR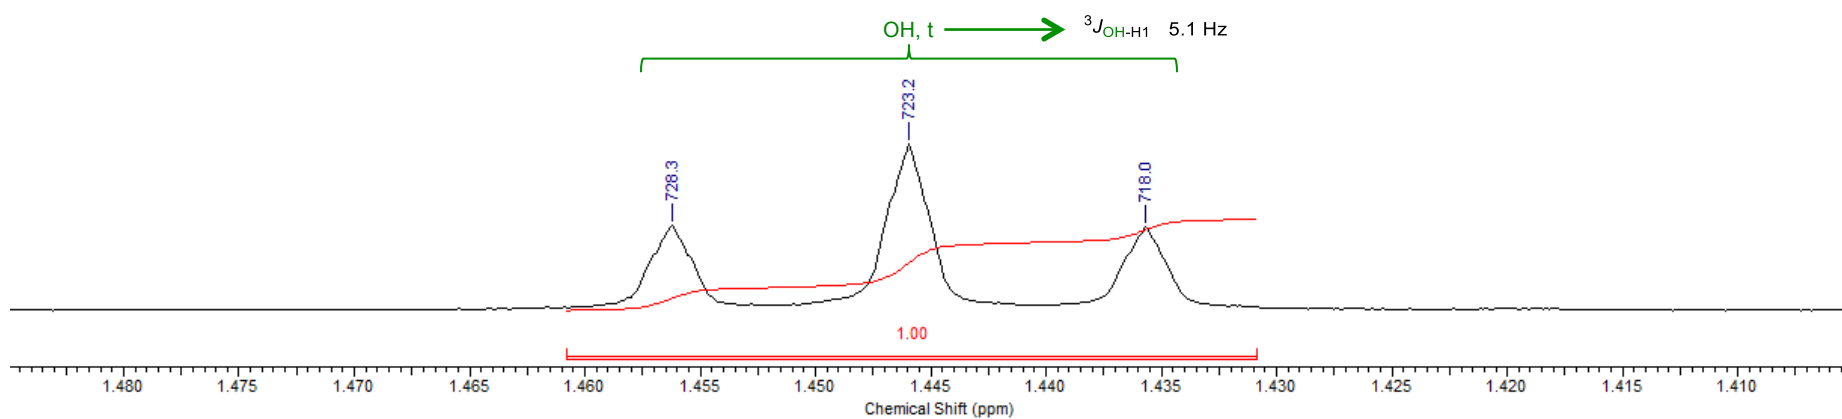

5.9.3 Detail of  $^1\text{H}$  (enhanced resolution spectra) and  $^1\text{H}\{^{19}\text{F}\}$  NMR of OH signal ( $\text{CDCl}_3$ , 500 MHz, 25 °C) (G)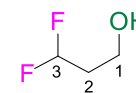 $^1\text{H}\{^{19}\text{F}\}$  NMR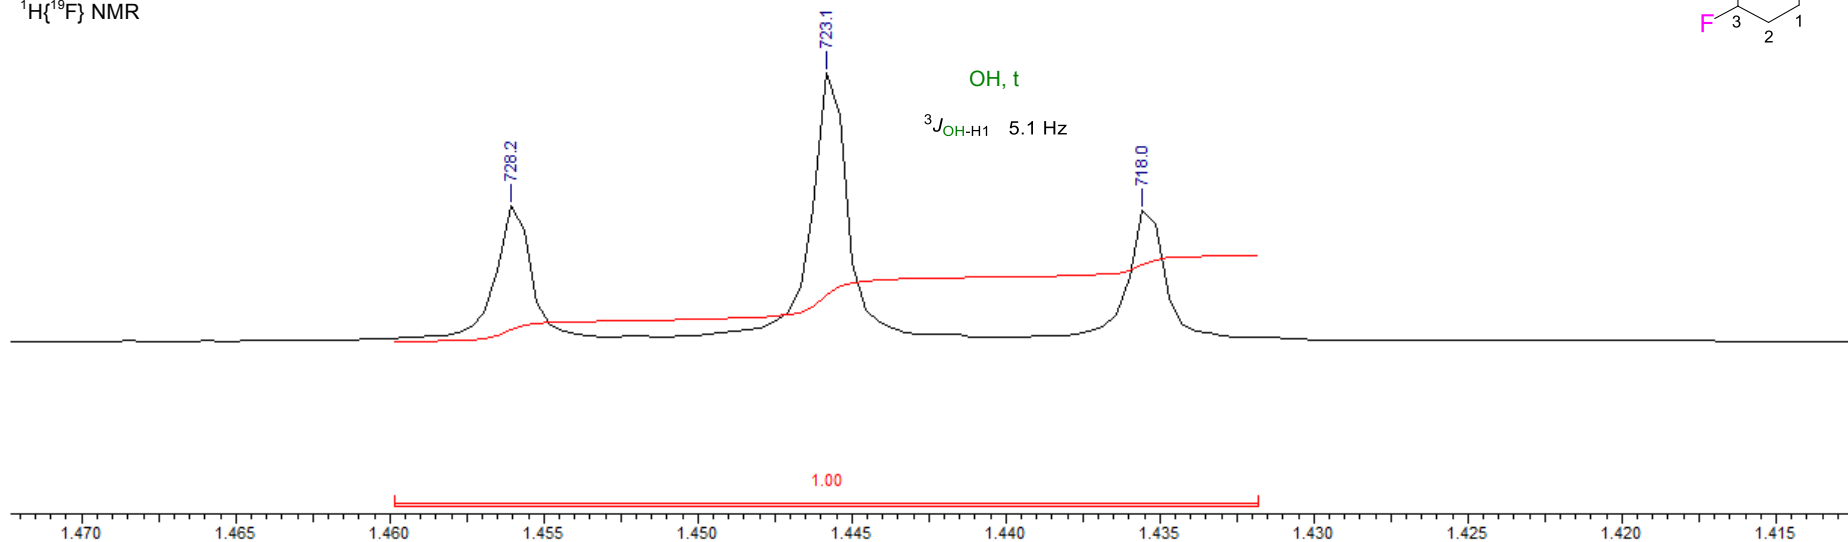 $^1\text{H}$  NMR, enhanced resolution spectra  
(Gaussian multiplication, lb: -0.9 ; gb: 0.4)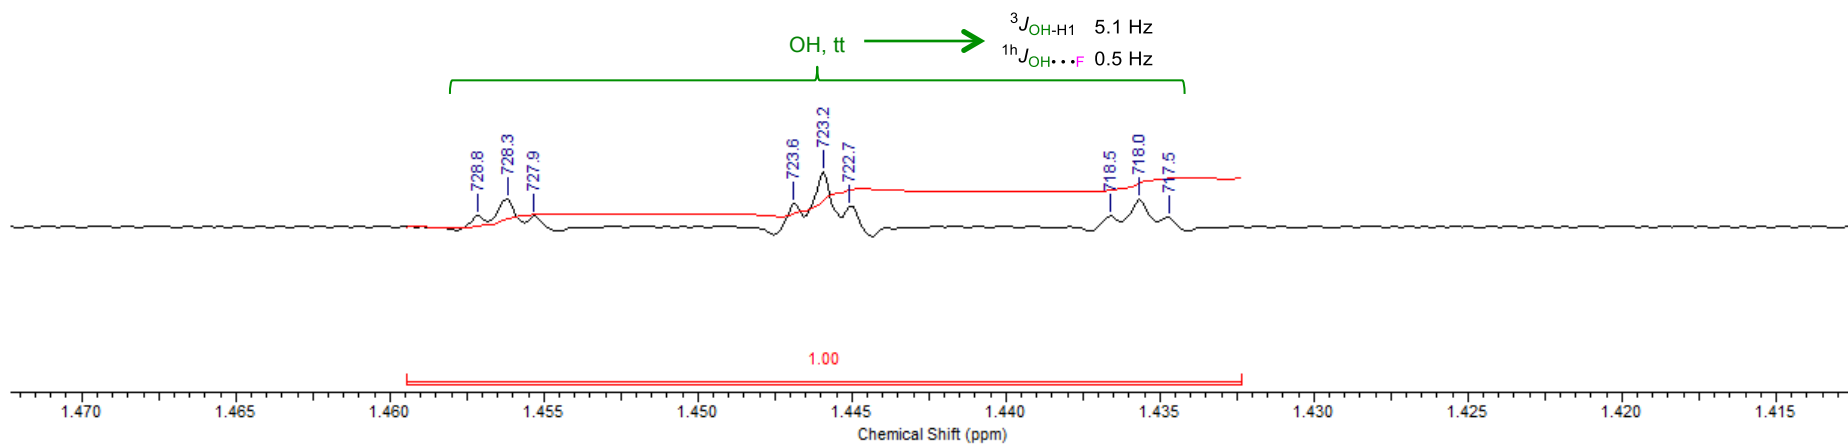

5.9.4  $^{19}\text{F}$  NMR spectrum ( $\text{CDCl}_3$ , 470 MHz, 25 °C) (G)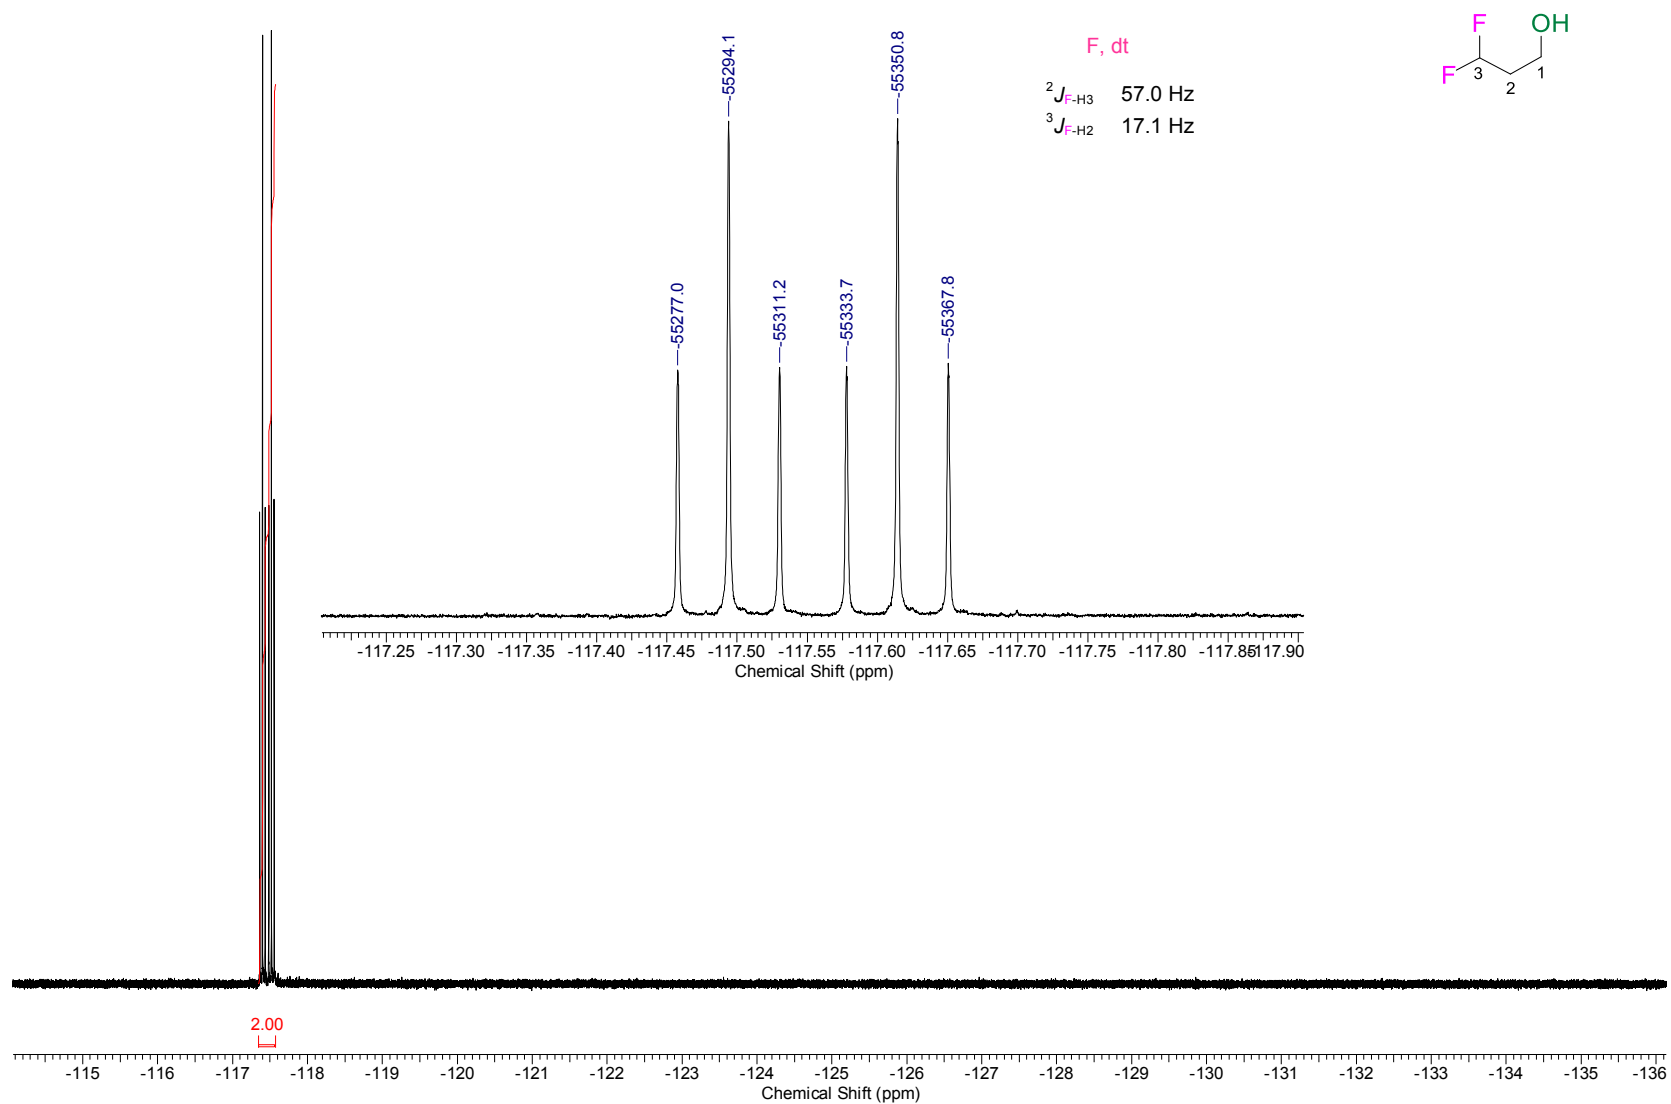

## 5.10 4,4,4-trifluorobutan-2-ol (H)

5.10.1  $^1\text{H}$  NMR spectrum ( $\text{CDCl}_3$ , 500 MHz, 25 °C)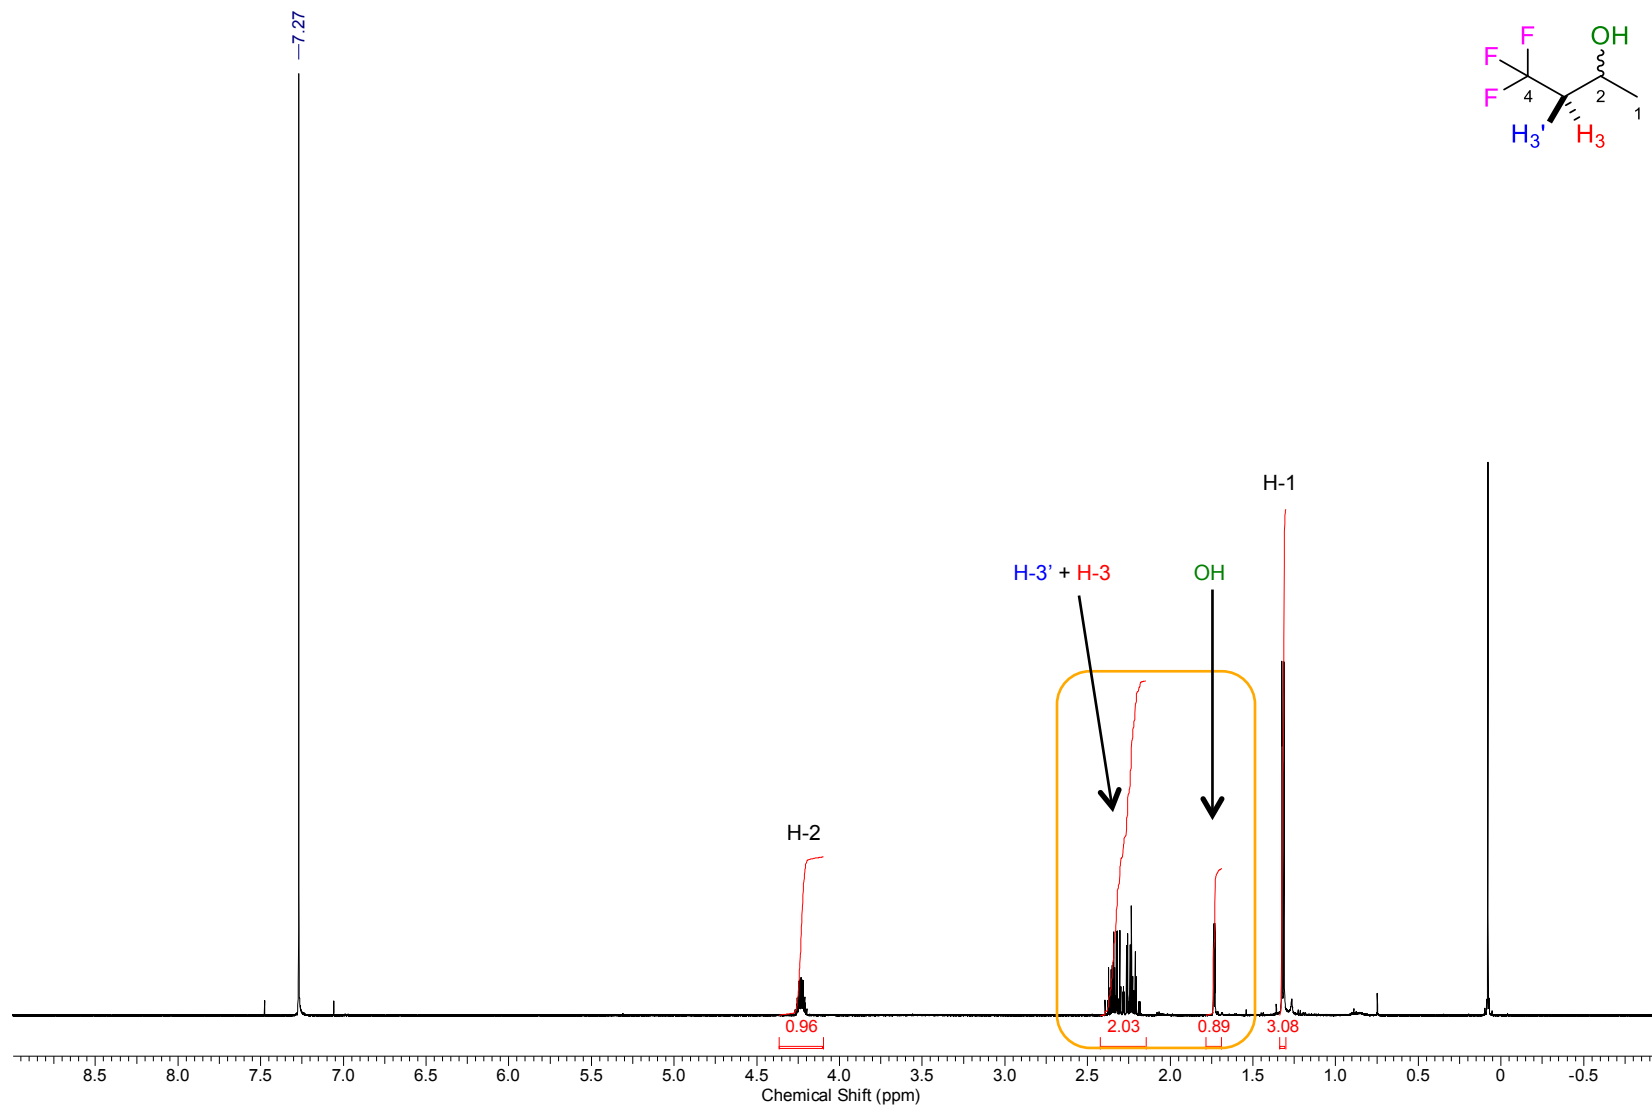

5.10.2 Detail of  $^1\text{H}$  and  $^1\text{H}\{^{19}\text{F}\}$  NMR of OH, H-3 and H-3' signals ( $\text{CDCl}_3$ , 500 MHz, 25 °C) (H) $^1\text{H}\{^{19}\text{F}\}$  NMR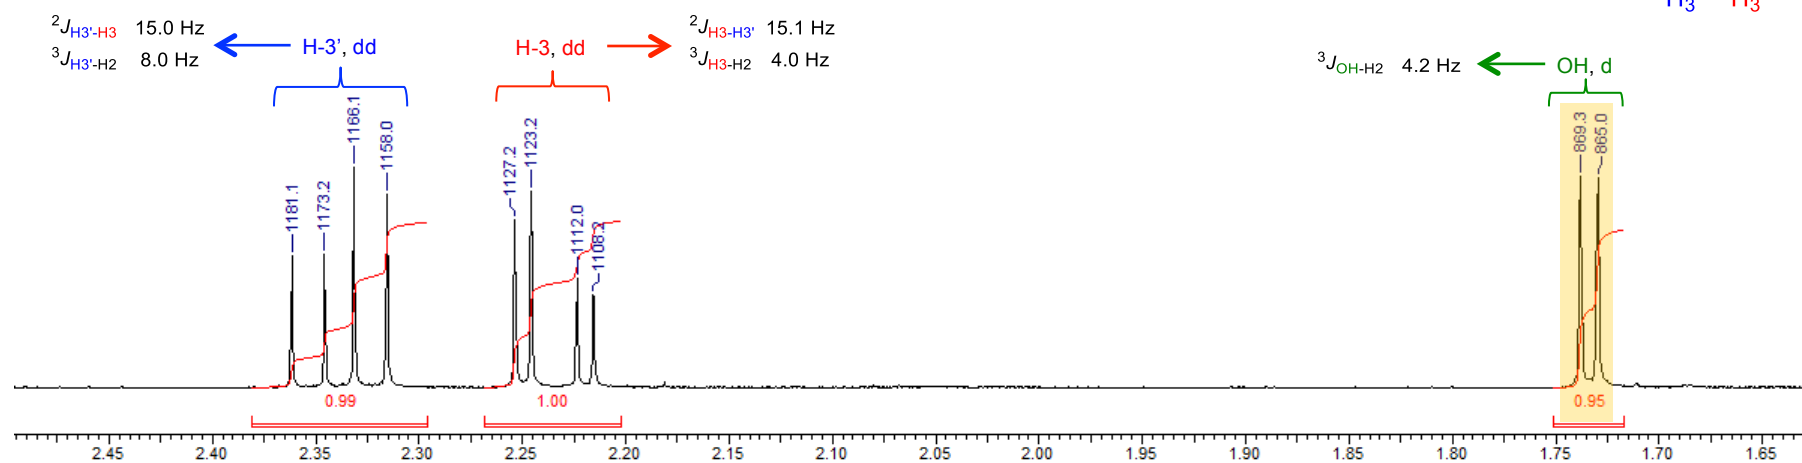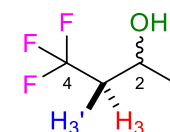 $^1\text{H}$  NMR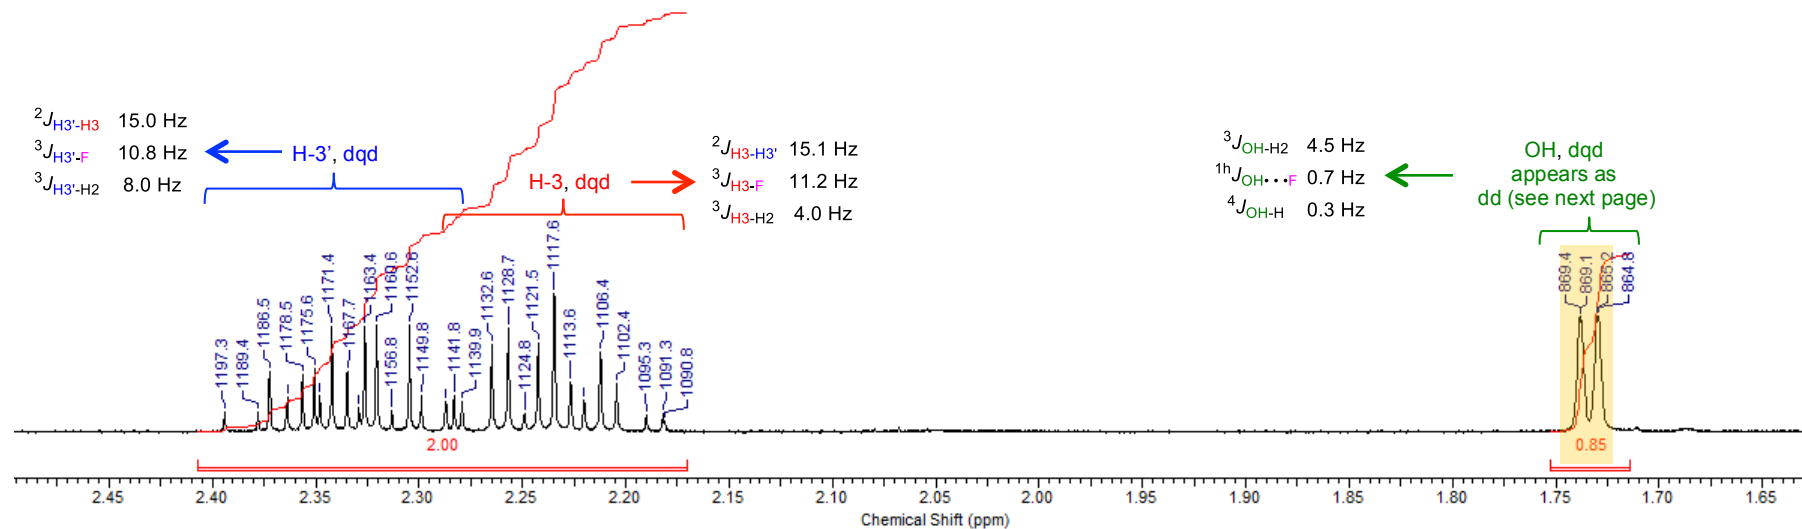



5.10.3 Detail of enhanced resolution spectra of  $^1\text{H}$  and  $^1\text{H}\{^{19}\text{F}\}$  NMR of OH signal ( $\text{CDCl}_3$ , 500 MHz, 25 °C) (H)

$^1\text{H}\{^{19}\text{F}\}$  NMR, enhanced resolution spectra  
(Gaussian multiplication, lb: -1 ; gb: 0.5)

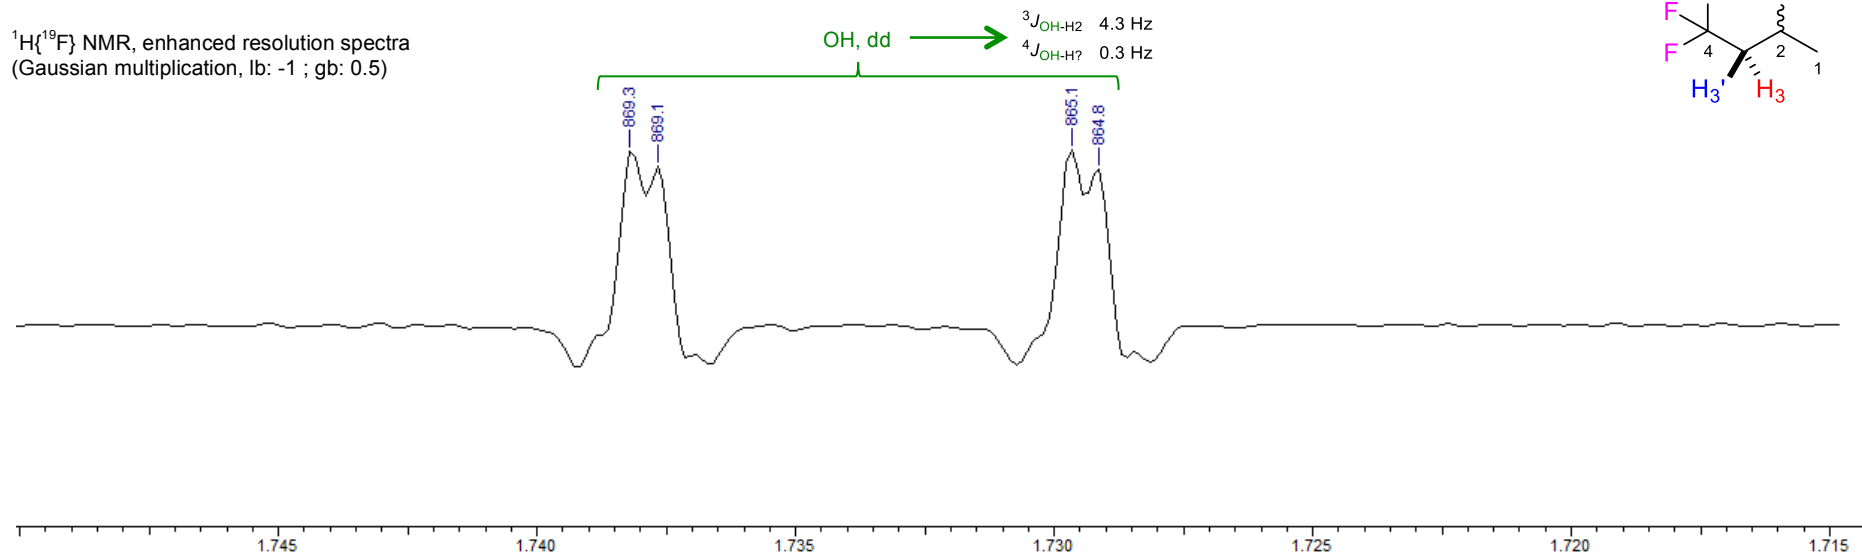

$^1\text{H}$  NMR, enhanced resolution spectra  
(Gaussian multiplication, lb: -0.7 ; gb: 0.35)

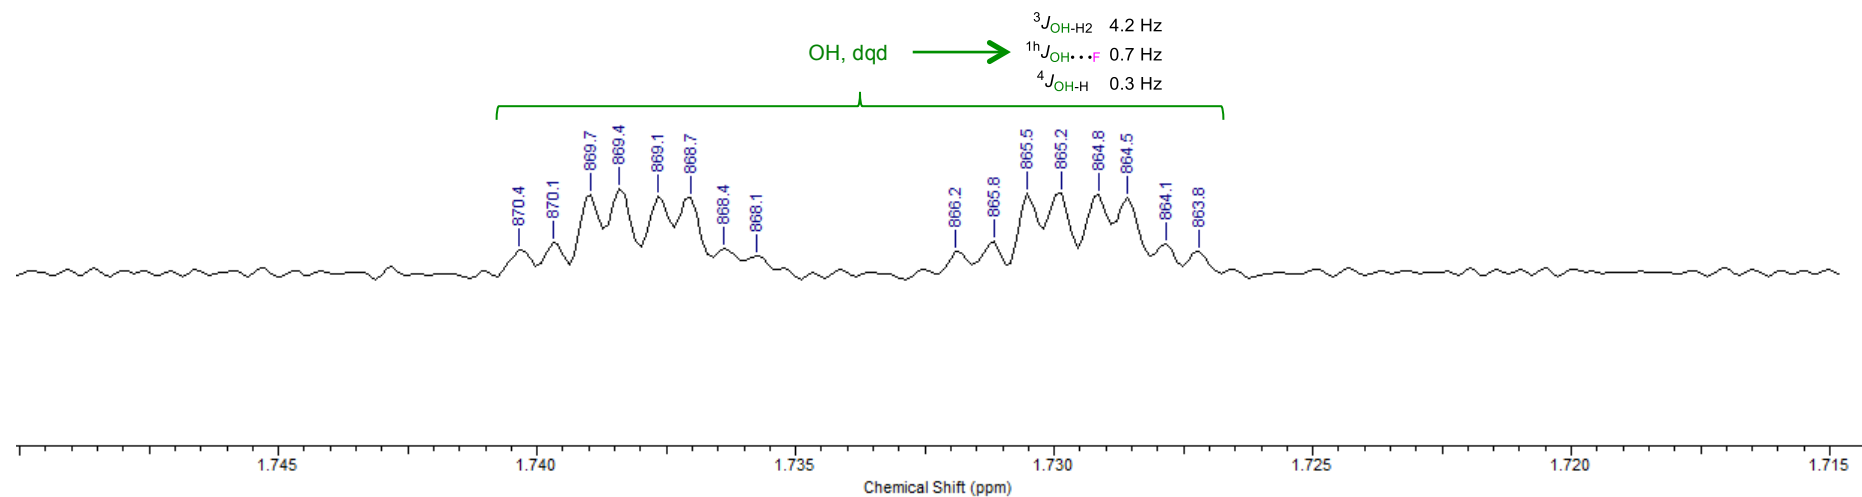



## 5.11 3,3,3-trifluoropropan-1-ol (I)

5.11.1  $^1\text{H}$  NMR spectrum ( $\text{CDCl}_3$ , 500 MHz, 25 °C)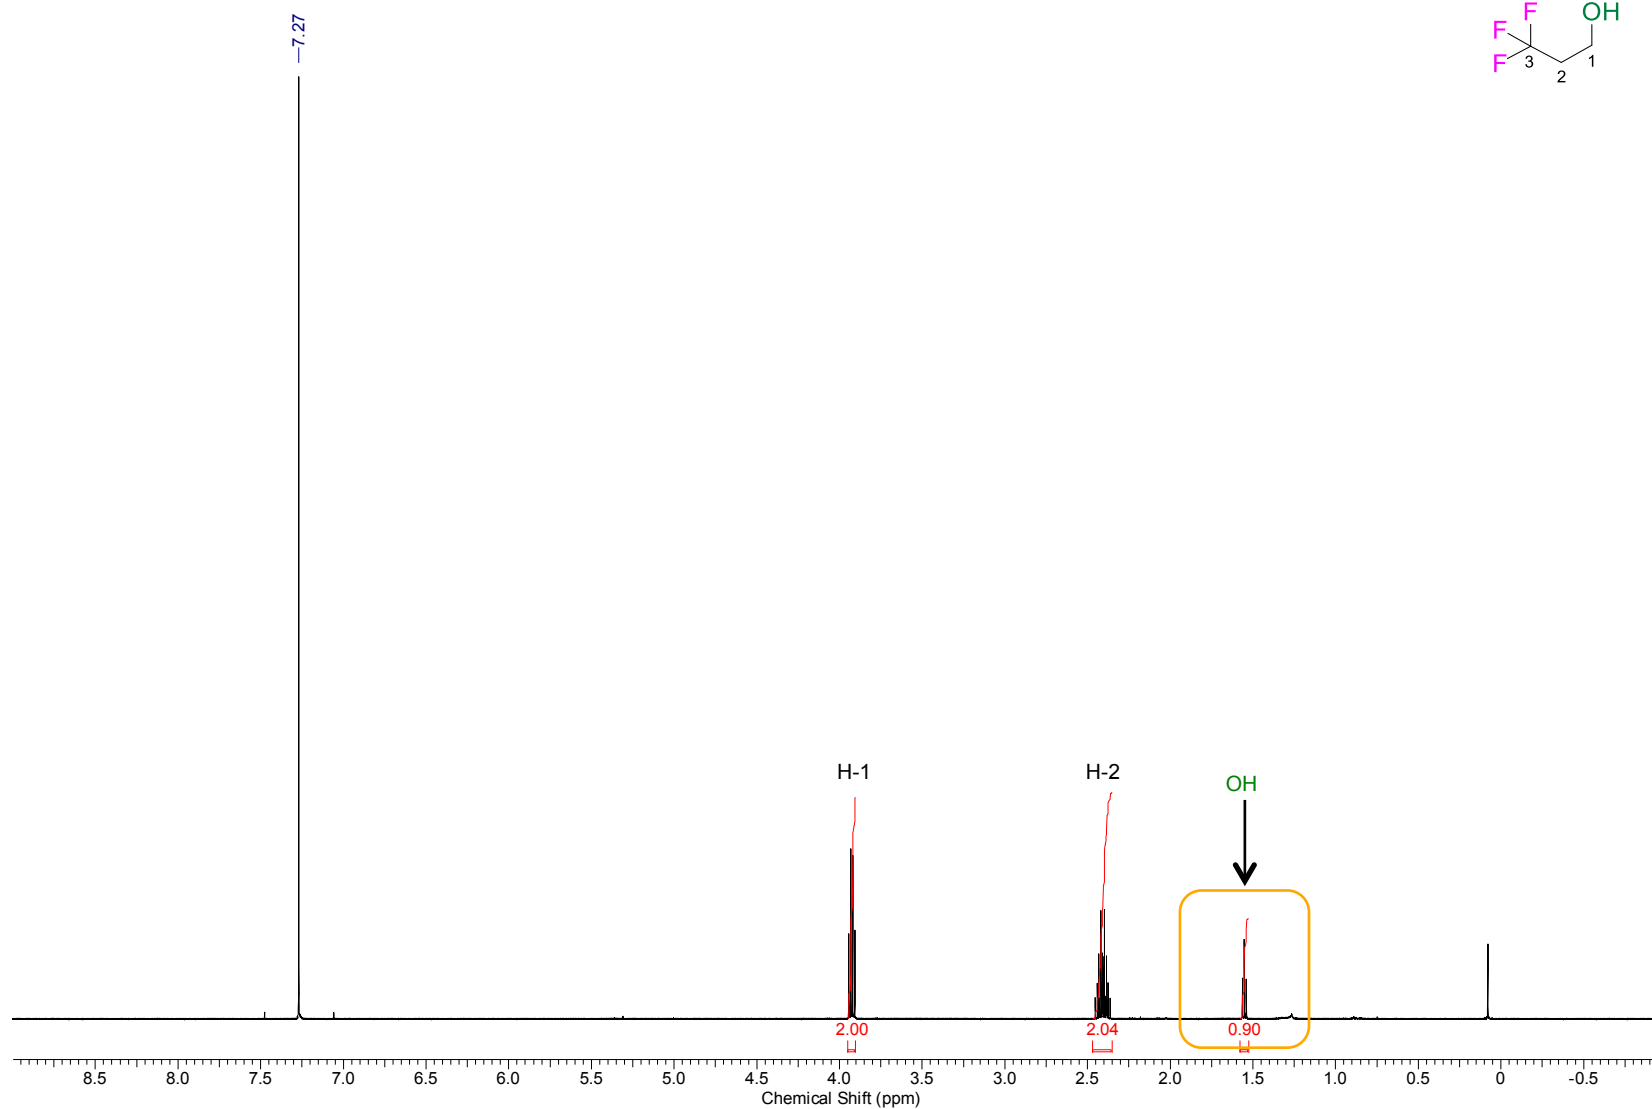

5.11.2 Detail of  $^1\text{H}$  and  $^1\text{H}\{^{19}\text{F}\}$  NMR of OH signal ( $\text{CDCl}_3$ , 500 MHz, 25 °C) (I) $^1\text{H}\{^{19}\text{F}\}$  NMR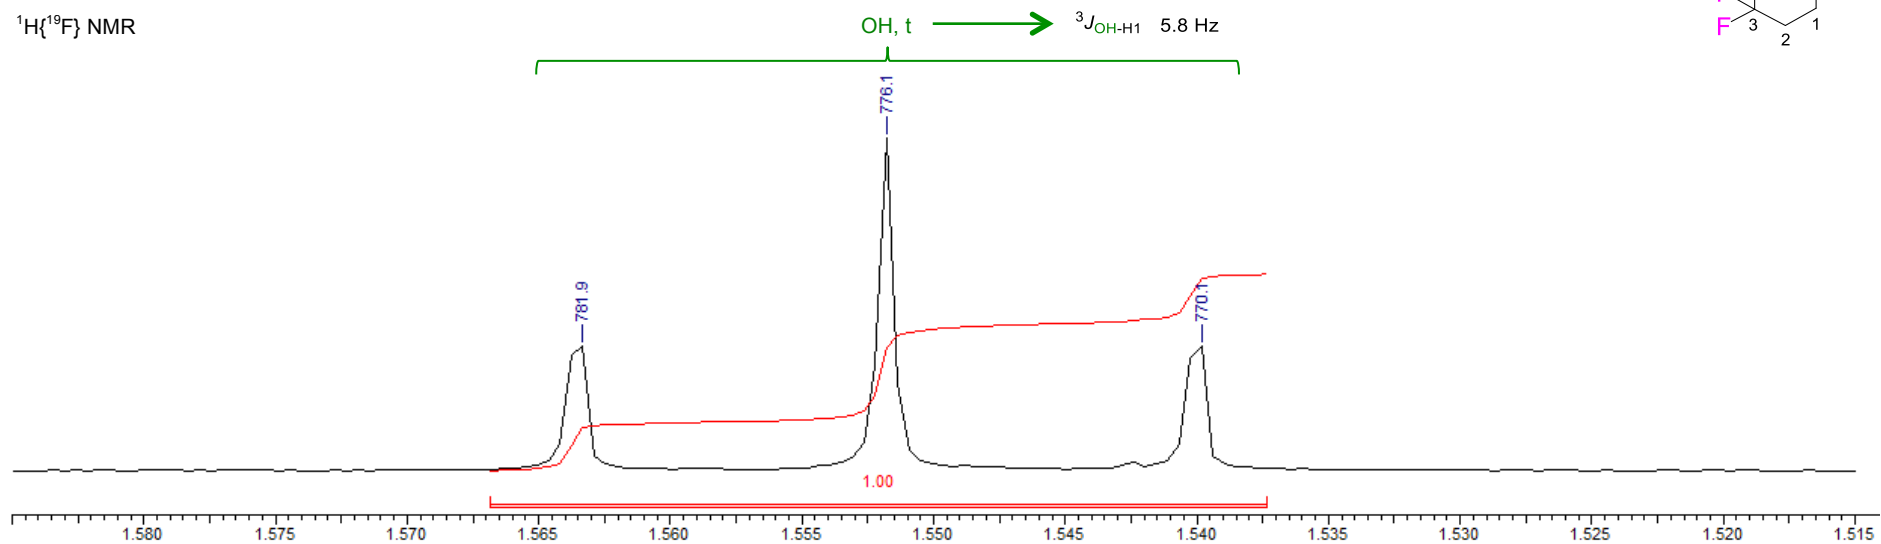 $^1\text{H}$  NMR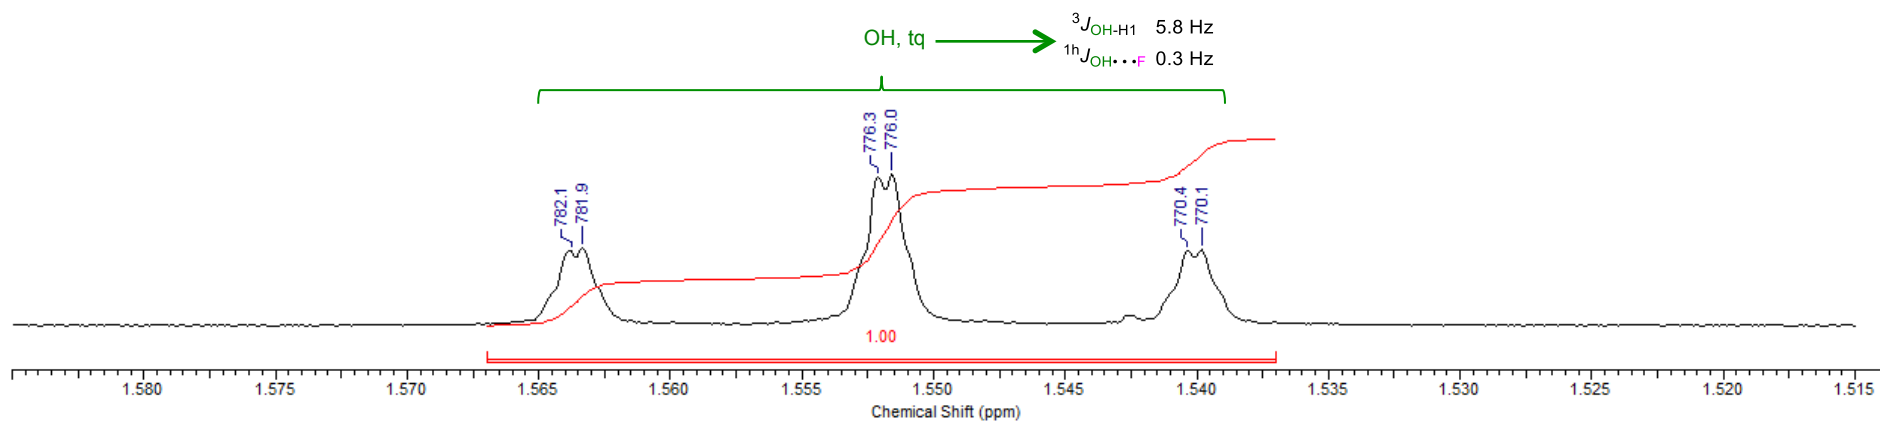

5.11.3 Detail of  $^1\text{H}$  (enhanced resolution spectra) and  $^1\text{H}\{^{19}\text{F}\}$  NMR of OH signal ( $\text{CDCl}_3$ , 500 MHz, 25 °C) (I)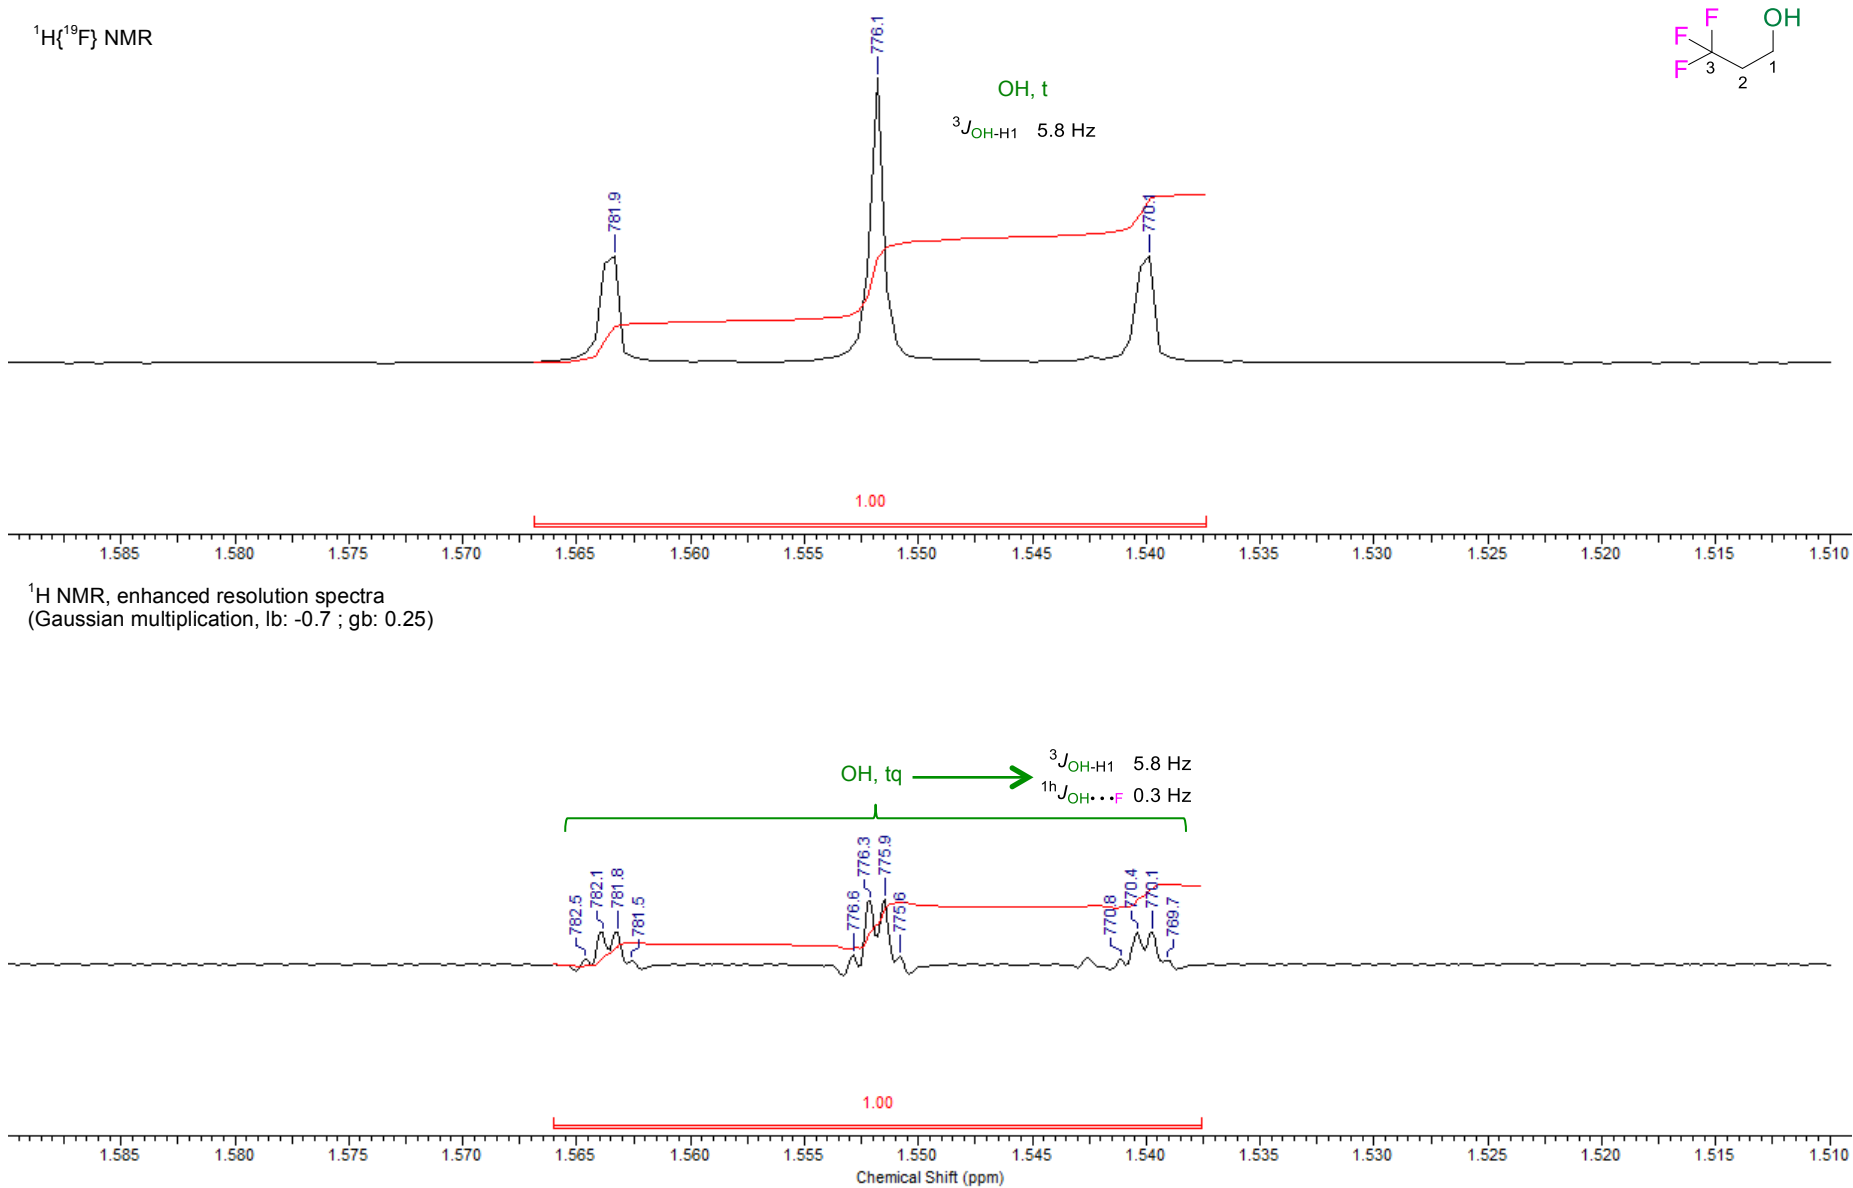

5.11.4  $^{19}\text{F}$  NMR spectrum ( $\text{CDCl}_3$ , 470 MHz, 25 °C) (I)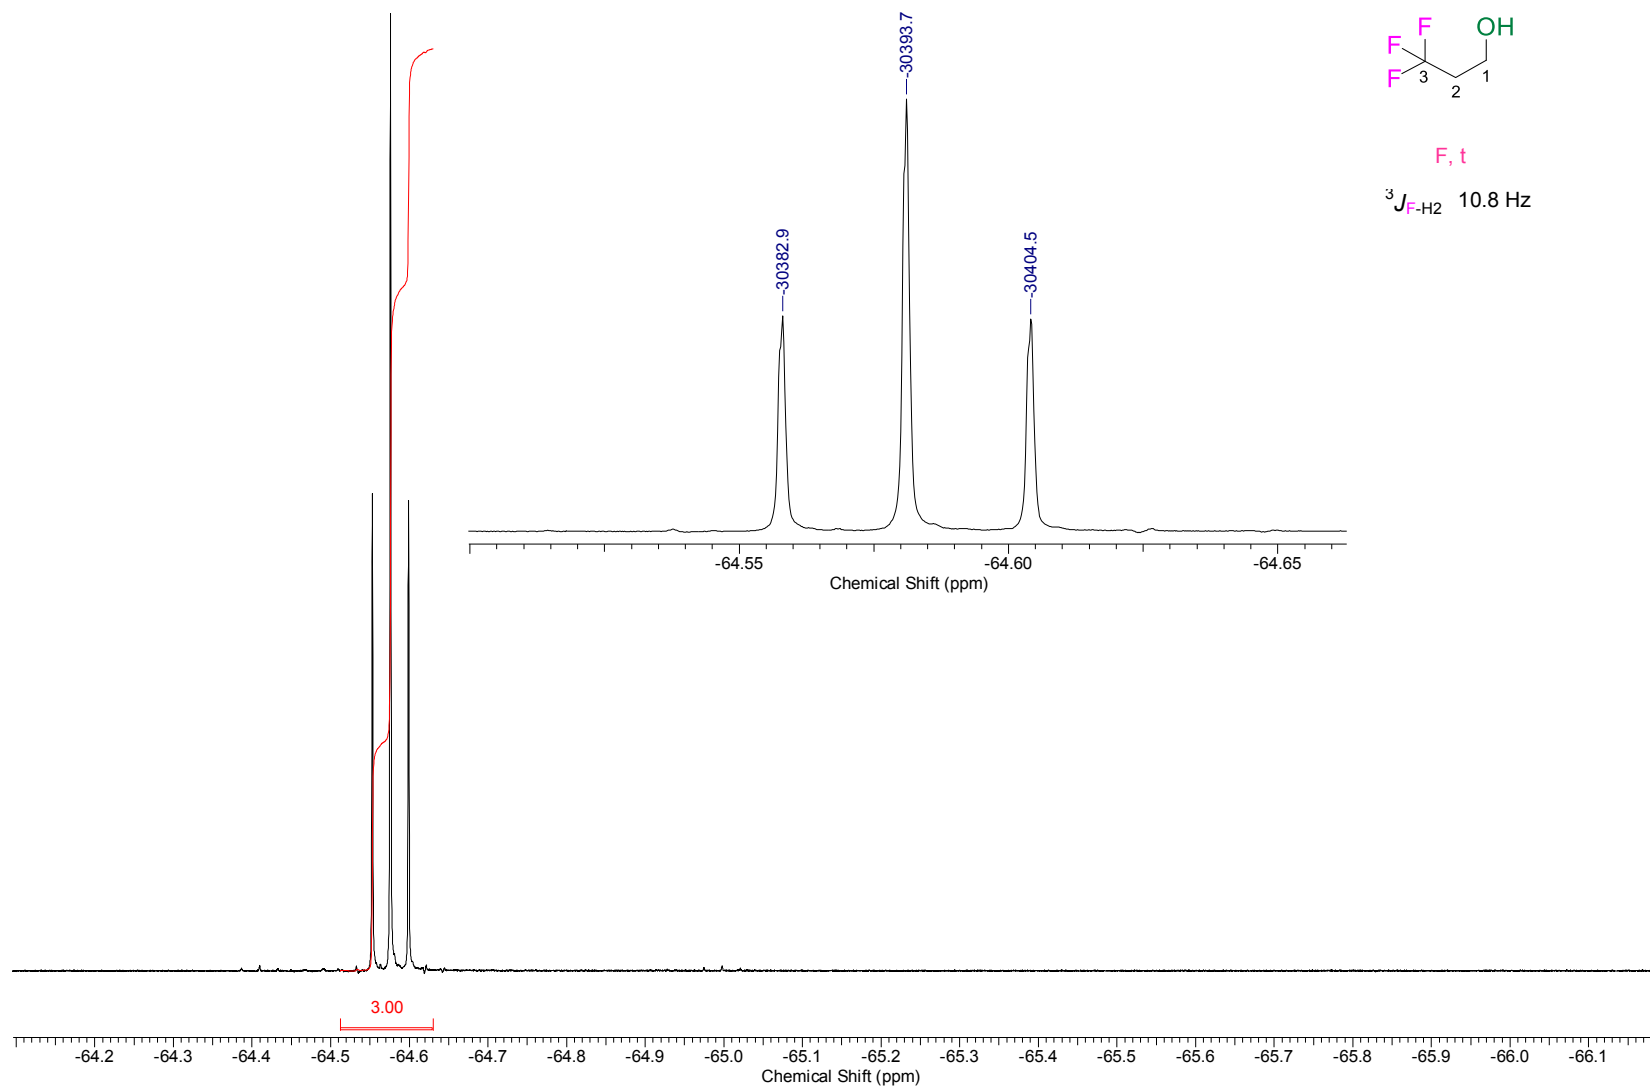

---

# SUPPORTING INFORMATION 3

## Synthesis of the fluorohydrins

---

|         |                                                                                                                                                                                         |     |
|---------|-----------------------------------------------------------------------------------------------------------------------------------------------------------------------------------------|-----|
| 6       | Synthesis of the fluorohydrins .....                                                                                                                                                    | 92  |
| 6.1     | Synthesis of ( $\pm$ )- <i>syn</i> and ( $\pm$ )- <i>anti</i> -4-fluoropentan-2-ol (( $\pm$ )- <i>syn</i> -A and ( $\pm$ )- <i>anti</i> -A).....                                        | 92  |
| 6.1.1   | Isolation of <i>meso</i> -2,4-pentanediol ( <i>meso</i> -SI-1) and ( $\pm$ )-2,4-pentanediol (( $\pm$ )-SI-2) from a commercial mixture of <i>meso</i> and <i>racemic</i> isomers.....  | 92  |
| 6.1.1.1 | <i>meso</i> -2,4-pentanediol ( <i>meso</i> -SI-1).....                                                                                                                                  | 92  |
| 6.1.1.2 | ( $\pm$ )-2,4-pentanediol (( $\pm$ )-SI-2).....                                                                                                                                         | 92  |
| 6.1.2   | Synthesis of ( $\pm$ )- <i>anti</i> and ( $\pm$ )- <i>syn</i> -2-(3'-methylbenzoyloxy)-4-fluoropentane (( $\pm$ )- <i>anti</i> -SI-3 and ( $\pm$ )- <i>syn</i> -SI-4) ..                | 92  |
| 6.1.2.1 | General procedure for the mono-deoxyfluorination of diols using DFMBBA in diglyme .....                                                                                                 | 92  |
| 6.1.2.2 | ( $\pm$ )- <i>syn</i> -2-(3'-methylbenzoyloxy)-4-fluoropentane ( $\pm$ )- <i>syn</i> -SI-4 .....                                                                                        | 93  |
| 6.1.2.3 | ( $\pm$ )- <i>anti</i> -2-(3'-methylbenzoyloxy)-4-fluoropentane ( $\pm$ )- <i>anti</i> -SI-3 .....                                                                                      | 93  |
| 6.1.3   | Synthesis of fluorohydrins ( $\pm$ )- <i>syn</i> -A and ( $\pm$ )- <i>anti</i> -A.....                                                                                                  | 93  |
| 6.1.3.1 | General procedure for the deprotection of ( $\pm$ )- <i>anti</i> -SI-3 and ( $\pm$ )- <i>syn</i> -SI-4.....                                                                             | 93  |
| 6.1.3.2 | ( $\pm$ )- <i>syn</i> -4-fluoropentan-2-ol ( $\pm$ )- <i>syn</i> -A .....                                                                                                               | 94  |
| 6.1.3.3 | ( $\pm$ )- <i>anti</i> -4-fluoropentan-2-ol ( $\pm$ )- <i>anti</i> -A.....                                                                                                              | 95  |
| 6.2     | Synthesis of ( $\pm$ )-4-fluorobutan-2-ol ( $\pm$ )-B .....                                                                                                                             | 96  |
| 6.2.1   | Synthesis of 3-fluoropropanal SI-5 .....                                                                                                                                                | 96  |
| 6.2.2   | Synthesis of ( $\pm$ )-4-fluorobutan-2-ol ( $\pm$ )-B .....                                                                                                                             | 96  |
| 6.3     | Synthesis of 3-fluoro-2,2-dimethylpropan-1-ol C .....                                                                                                                                   | 97  |
| 6.3.1   | Synthesis of 3-fluoro-2,2-dimethyl-1-( <i>meta</i> -methylbenzoyloxy)-propane SI-6 .....                                                                                                | 97  |
| 6.3.2   | Synthesis of 3-fluoro-2,2-dimethylpropan-1-ol C .....                                                                                                                                   | 97  |
| 6.4     | Synthesis of ( $\pm$ )-4,4-difluoropentan-2-ol ( $\pm$ )-E .....                                                                                                                        | 98  |
| 6.4.1   | Synthesis of 4,6-dimethyl-2-phenyl-1,3-dioxane <i>meso</i> -SI-7 and ( $\pm$ )-SI-8.....                                                                                                | 98  |
| 6.4.2   | Synthesis of (2 <i>S</i> *,4 <i>R</i> *)-4-benzyloxy-pentan-2-ol ( $\pm$ )- <i>syn</i> -SI-9 and (2 <i>R</i> *,4 <i>R</i> *)-4-benzyloxy-pentan-2-ol ( $\pm$ )- <i>anti</i> -SI-10..... | 98  |
| 6.4.3   | Synthesis of ( $\pm$ )-4-benzyloxy-pentan-2-one ( $\pm$ )-SI-11.....                                                                                                                    | 99  |
| 6.4.4   | Synthesis of ( $\pm$ )-2-benzyloxy-4,4-difluoropentane ( $\pm$ )-SI-12.....                                                                                                             | 99  |
| 6.4.5   | Synthesis of ( $\pm$ )-4,4-difluoropentan-2-ol ( $\pm$ )-E .....                                                                                                                        | 99  |
| 6.5     | Synthesis of ( $\pm$ )-4,4-difluorobutan-2-ol ( $\pm$ )-F.....                                                                                                                          | 100 |
| 6.5.1   | Synthesis of ( $\pm$ )-(2 <i>S</i> ,4 <i>R</i> )-2,4-dimethyl-1,3-dioxane ( $\pm$ )-SI-13 .....                                                                                         | 100 |
| 6.5.2   | Synthesis of ( $\pm$ )-3-benzyloxy-butan-1-ol ( $\pm$ )-SI-14.....                                                                                                                      | 101 |
| 6.5.3   | Synthesis of ( $\pm$ )-3-benzyloxy-butanal ( $\pm$ )-SI-15 .....                                                                                                                        | 101 |
| 6.5.4   | Synthesis of ( $\pm$ )-2-benzyloxy-4,4-difluorobutane ( $\pm$ )-SI-16.....                                                                                                              | 101 |
| 6.5.5   | Synthesis of ( $\pm$ )-4,4-difluorobutan-2-ol ( $\pm$ )-F.....                                                                                                                          | 102 |
| 6.6     | Synthesis of 3,3-difluoropropan-1-ol G.....                                                                                                                                             | 102 |
| 6.6.1   | Synthesis of 1-benzyloxy-3,3-difluoropropane SI-17.....                                                                                                                                 | 102 |

|       |                                              |     |
|-------|----------------------------------------------|-----|
| 6.6.2 | Synthesis of 3,3-difluoropropan-1-ol G ..... | 103 |
|-------|----------------------------------------------|-----|



## 6 Synthesis of the fluorohydrins

### 6.1 Synthesis of ( $\pm$ )-*syn* and ( $\pm$ )-*anti*-4-fluoropentan-2-ol (( $\pm$ )-*syn*-A and ( $\pm$ )-*anti*-A)

#### 6.1.1 Isolation of *meso*-2,4-pentanediol (*meso*-SI-1) and ( $\pm$ )-2,4-pentanediol (( $\pm$ )-SI-2) from a commercial mixture of *meso* and *racemic* isomers

*meso*-SI-1 and ( $\pm$ )-SI-2 were separated from a commercial mixture of *meso*- and *racemic*-2,4-pentanediols (10 g, 96.0 mmol) by flash chromatography (5 to 50% of ethyl acetate in hexane). *meso*-SI-1 was obtained in pure form as a colorless oil (3.90 g, 37.4 mmol, 39%). The *racemic* isomer ( $\pm$ )-SI-2 was contaminated with *meso*-SI-1 (3.93 g, ratio ( $\pm$ )-SI-2/*meso*-SI-1 97:3). To remove traces of *meso*-SI-1, the corresponding mixture (3.93 g, 37.7 mmol, 1 equiv.) was treated with thionyl chloride (0.41 mL, 5.66 mmol, 0.15 equiv.) in dichloromethane (100 mL).<sup>1</sup> This mixture was stirred at 0 °C for 1 h and then the solvent was evaporated. As *meso*-SI-1 reacted with thionyl chloride faster than ( $\pm$ )-SI-2 to form the cyclic sulfite, after flash chromatography (10 to 50% of ethyl acetate in hexane), ( $\pm$ )-SI-2 was isolated in pure form as a colorless oil (2.83 g, 27.2 mmol, 29%).

##### 6.1.1.1 *meso*-2,4-pentanediol (*meso*-SI-1)

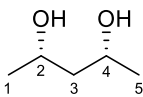 **IR** (neat) 3329(br,m), 2967(s), 2931(m), 1455(w), 1374(w), 1121(s), 919 (m) cm<sup>-1</sup>. **<sup>1</sup>H NMR** (400 MHz, CDCl<sub>3</sub>, 25 °C)  $\delta$  4.14–3.91 (m, 2H, H-2, H-4), 3.32 (s, 2H, OH), 1.56 (dt,  $J$  = 14.4, 3.2 Hz, 1H, H-3), 1.49 (dd,  $J$  = 14.5, 9.5 Hz, 1H, H-3), 1.20 (d,  $J$  = 6.2 Hz, 6H, H-1, H-5) ppm. **<sup>13</sup>C NMR** (101 MHz, CDCl<sub>3</sub>, 25 °C)  $\delta$  68.6 (2C, C-2, C-4), 46.2 (C-3), 23.9 (2C, C-1, C-5) ppm. **MS** (ESI+)  $m/z$  105 [M+H]<sup>+</sup>. **HRMS** (EI) calcd for C<sub>5</sub>H<sub>12</sub>O<sub>2</sub> [M]<sup>+</sup>: 104.0832, found 104.0792. The NMR signals correspond to the literature.<sup>2</sup>

##### 6.1.1.2 ( $\pm$ )-2,4-pentanediol (( $\pm$ )-SI-2)

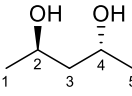 **IR** (neat) 3325(br,m), 2966(s), 2931(m), 1456(w), 1374(w), 1117(s), 1042(s), 919(m) cm<sup>-1</sup>. **<sup>1</sup>H NMR** (400 MHz, CDCl<sub>3</sub>, 25 °C)  $\delta$  4.16 (qdd,  $J$  = 6.1, 6.1, 5.2 Hz, 2H, H-2, H-4), 2.81 (s, 2H, OH), 1.60 (dd,  $J$  = 6.1, 5.2 Hz, 2H, H-3), 1.23 (d,  $J$  = 6.2 Hz, 6H, H-1, H-5) ppm. **<sup>13</sup>C NMR** (101 MHz, CDCl<sub>3</sub>, 25 °C)  $\delta$  64.7 (2C, C-2, C-4), 45.9 (C-3), 23.2 (2C, C-1, C-5) ppm. **MS** (ESI+)  $m/z$  105 [M+H]<sup>+</sup>. **HRMS** (ESI+) calcd for C<sub>5</sub>H<sub>12</sub>O<sub>2</sub>Na [M+Na]<sup>+</sup>: 127.0730, found 127.0733. The NMR signals correspond to the literature.<sup>2</sup>

### 6.1.2 Synthesis of ( $\pm$ )-*anti* and ( $\pm$ )-*syn*-2-(3'-methylbenzoyloxy)-4-fluoropentane (( $\pm$ )-*anti*-SI-3 and ( $\pm$ )-*syn*-SI-4)

#### 6.1.2.1 General procedure for the mono-deoxyfluorination of diols using DFMBBA in diglyme

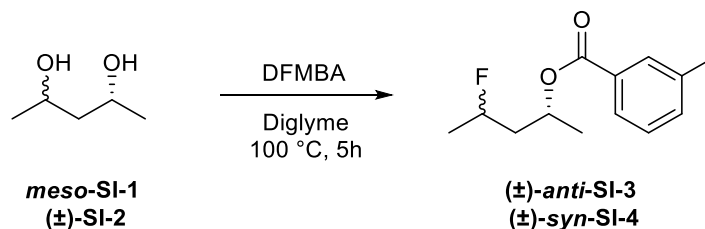

To diol *meso*-SI-1 or ( $\pm$ )-SI-2 (1 equiv.) was added a solution of *N,N*-diethyl- $\alpha,\alpha$ -difluoro(*meta*-methylbenzyl)amine (DFMBBA, 2 equiv.) in diglyme (0.4 mL/mmol of diol) at room temperature under argon. The reaction mixture was stirred and heated at 100 °C for 5 h under argon. After cooling, the reaction was quenched with an aqueous saturated solution of NaHCO<sub>3</sub> (1.1 mL/mmol) and stirred for 20 minutes. Subsequently, water (1.1 mL/mmol) was added to the reaction and the mixture was extracted with diethyl ether three times (2.1

mL/mmol). The combined organic phases were washed with brine (3.5 mL/mmol), dried over MgSO<sub>4</sub> and concentrated. The crude mixture was purified by flash chromatography (gradient 0 to 3% of ethyl acetate in hexane) and preparative HPLC (1.5% of ethyl acetate in hexane).

### 6.1.2.2 ( $\pm$ )-*syn*-2-(3'-methylbenzoyloxy)-4-fluoropentane ( $\pm$ )-*syn*-SI-4

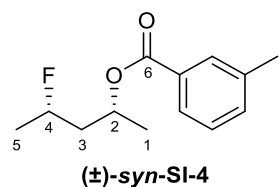

Starting from ( $\pm$ )-SI-2 (2.01 g, 19.3 mmol) using general procedure described above, ( $\pm$ )-*syn*-SI-4 was obtained as a colorless oil (3.72 g, 16.6 mmol, 86%).

**IR** (neat) 3022(w), 2978(s), 2938(m), 1712(s), 1457(w), 1299(s), 1199(s), 1100(s), 744(s) cm<sup>-1</sup>. **<sup>1</sup>H NMR** (400 MHz, CDCl<sub>3</sub>, 25 °C)  $\delta$  7.92–7.89 (m, 2H, H<sub>Ar</sub>), 7.40–7.30 (m, 2H, H<sub>Ar</sub>), 5.36–5.28 (m, 1H, H-2), 4.96–4.76 (m, <sup>2</sup>J<sub>H4-F</sub> = 48.5 Hz, 1H, H-4), 2.42 (s, 3H, CH<sub>3-Ar</sub>), 2.28–2.17 (m, 1H, H-3), 1.85 (ddt, *J* = 26.4, 14.4, 5.3 Hz, 1H, H-3'), 1.42 (d, *J* = 6.1 Hz, 3H, H-1), 1.39 (dd, *J* = 24.1, 6.1 Hz, 3H, H-5) ppm. **<sup>13</sup>C NMR** (101 MHz, CDCl<sub>3</sub>, 25 °C)  $\delta$  166.1 (C-6), 138.1 (C<sub>qAr</sub>), 133.6 (CH<sub>Ar</sub>), 130.4 (C<sub>qAr</sub>), 130.0 (CH<sub>Ar</sub>), 128.2 (CH<sub>Ar</sub>), 126.7 (CH<sub>Ar</sub>), 88.0 (d, *J* = 164 Hz, C-4), 68.5 (d, *J* = 5.1 Hz, C-2), 42.8 (d, *J* = 20.5 Hz, C-3), 21.2 (CH<sub>3-Ar</sub>), 21.1 (d, *J* = 22.7 Hz, C-5), 20.1 (C-1) ppm. **<sup>19</sup>F NMR** (376 MHz, CDCl<sub>3</sub>, 25 °C) –173.3– –172.9 (m) ppm. **MS** (ESI+) *m/z* 225 [M+H]<sup>+</sup>. **HRMS** (ESI+) calcd for C<sub>13</sub>H<sub>17</sub>FO<sub>2</sub>Na [M+Na]<sup>+</sup> 247.1105, found 247.1109. The NMR signals correspond to the literature.<sup>3</sup>

### 6.1.2.3 ( $\pm$ )-*anti*-2-(3'-methylbenzoyloxy)-4-fluoropentane ( $\pm$ )-*anti*-SI-3

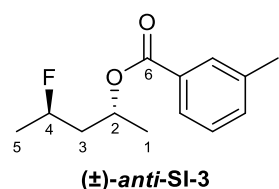

Starting from *meso*-SI-1 (3.01 g, 28.9 mmol), using general procedure described above, ( $\pm$ )-*anti*-SI-3 was obtained as a colorless oil (4.91 g, 21.9 mmol, 76%).

**IR** (neat) 3025(w), 2980(s), 2935(m), 1712(s), 1456(w), 1272(s), 1198(s), 1101(s), 744(s) cm<sup>-1</sup>. **<sup>1</sup>H NMR** (400 MHz, CDCl<sub>3</sub>, 25 °C)  $\delta$  7.87–7.82 (m, 2H, H<sub>Ar</sub>), 7.39–7.31 (m, 2H, H<sub>Ar</sub>), 5.39–5.31 (m, 1H, H-2), 4.92–4.72 (m, <sup>2</sup>J<sub>H4-F</sub> = 49.4 Hz, 1H, H-4), 2.42 (s, 3H, CH<sub>3-Ar</sub>), 2.05–1.88 (m, 2H, H-3), 1.40 (d, *J* = 6.2 Hz, 3H, H-1), 1.38 (dd, *J* = 23.7, 6.2 Hz, 3H, H-5) ppm. **<sup>13</sup>C NMR** (101 MHz, CDCl<sub>3</sub>, 25 °C)  $\delta$  166.1 (C-6), 138.1 (C<sub>qAr</sub>), 133.6 (CH<sub>Ar</sub>), 130.5 (C<sub>qAr</sub>), 130.0 (CH<sub>Ar</sub>), 128.2 (CH<sub>Ar</sub>), 126.6 (CH<sub>Ar</sub>), 87.5 (d, *J* = 166 Hz, C-4), 68.3 (d, *J* = 3.7 Hz, C-2), 43.5 (d, *J* = 20.5 Hz, C-3), 21.4 (d, *J* = 22.0 Hz, C-5), 21.2 (CH<sub>3-Ar</sub>), 20.6 (C-1) ppm. **<sup>19</sup>F NMR** (376 MHz, CDCl<sub>3</sub>, 25 °C) –174.8– –174.3 (m) ppm. **MS** (ESI+) *m/z* 225 [M+H]<sup>+</sup>. **HRMS** (ESI+) calcd for C<sub>13</sub>H<sub>17</sub>FO<sub>2</sub>Na [M+Na]<sup>+</sup> 247.1105, found 247.1104.

## 6.1.3 Synthesis of fluorohydrins ( $\pm$ )-*syn*-A and ( $\pm$ )-*anti*-A

### 6.1.3.1 General procedure for the deprotection of ( $\pm$ )-*anti*-SI-3 and ( $\pm$ )-*syn*-SI-4

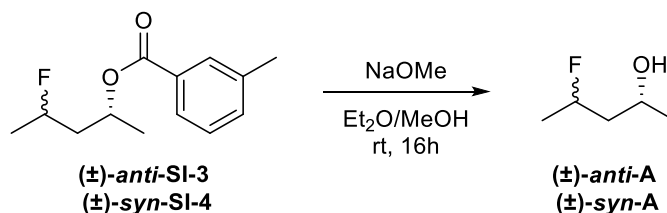

To a solution of ( $\pm$ )-*anti*-SI-3 or ( $\pm$ )-*syn*-SI-4 (1 equiv.) in dry diethyl ether (2.2 mL/mmol) was added a solution of sodium methoxide in methanol (25 wt. %, 2 equiv.) at 0 °C under argon. The reaction mixture was stirred at room temperature for 16 hours and then neutralized with Amberlite<sup>®</sup> CG-50. The resin was filtered off and rinsed with diethyl ether (4 mL/mmol). The filtrate was washed two times with an aqueous saturated solution of potassium carbonate (4 mL/mmol), then with brine (4 mL/mmol), dried over MgSO<sub>4</sub> and concentrated in vacuo (P > 700 mbar). The crude mixture was purified by flash chromatography (gradient 0 to 25% of diethyl ether in pentane).

**6.1.3.2 ( $\pm$ )-syn-4-fluoropentan-2-ol ( $\pm$ )-syn-A**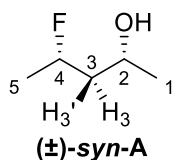

Starting from ( **$\pm$** )-syn-SI-4 (3.67 g, 16.3 mmol), using general procedure described above, ( **$\pm$** )-syn-A was obtained as a colorless oil (0.861 g, 8.11 mmol, 50%).

**IR** (neat) 3364(br), 2977(s), 2938(m), 1457(w), 1386(s), 1116(s), 1037(s), 918(s), 820(s)  $\text{cm}^{-1}$ .

**$^1\text{H NMR}$**  (500 MHz,  $\text{CDCl}_3$ , 25  $^\circ\text{C}$ )  $\delta$  4.89 (ddqdd,  $^2J_{\text{H4-F}} = 49.5$  Hz,  $^3J_{\text{H4-H3}} = 9.0$  Hz,  $^3J_{\text{H4-H5}} = 6.1$  Hz,  $^3J_{\text{H4-H3}'} = 4.0$  Hz,  $J = 0.3$  Hz, 1H, H-4), 4.05 (dqdd,  $^3J_{\text{H2-H3}} = 7.9$  Hz,  $^3J_{\text{H2-H1}} = 6.3$  Hz,  $^3J_{\text{H2-H3}'} = 4.0$  Hz,  $^3J_{\text{H2-OH}} = 3.4$  Hz, 1H, H-2), 1.91 (dddd,  $^2J_{\text{H3-H3}'} = 14.6$  Hz,  $^3J_{\text{H3-F}} = 13.6$  Hz,  $^3J_{\text{H3-H4}} = 9.0$  Hz,  $^3J_{\text{H3-H2}} = 7.9$  Hz, 1H, H-3), 1.88 (dd,  $^1J_{\text{OH}\cdots\text{F}} = 6.6$  Hz,  $^3J_{\text{OH-H2}} = 3.4$  Hz, 1H, OH), 1.64 (ddt,  $^3J_{\text{H3}'-F} = 34.7$  Hz,  $^2J_{\text{H3}'-H3} = 14.6$  Hz,  $^3J_{\text{H3}'-H2} = 4.0$  Hz,  $^3J_{\text{H3}'-H4} = 4.0$  Hz, 1H, H-3'), 1.38 (dd,  $^3J_{\text{H5-F}} = 24.5$  Hz,  $^3J_{\text{H5-H4}} = 6.1$  Hz, 3H, H-5), 1.25 (d,  $^3J_{\text{H1-H2}} = 6.3$  Hz, 3H, H-1) ppm.

**$^1\text{H}\{^{19}\text{F}\}$  NMR** (500 MHz,  $\text{CDCl}_3$ , 25  $^\circ\text{C}$ )  $\delta$  4.89 (dq,  $^3J_{\text{H4-H3}} = 9.0$  Hz,  $^3J_{\text{H4-H5}} = 6.1$  Hz,  $^3J_{\text{H4-H3}'} = 4.0$  Hz, 1H, H-4), 4.05 (dqdd,  $^3J_{\text{H2-H3}} = 7.7$  Hz,  $^3J_{\text{H2-H1}} = 6.2$  Hz,  $^3J_{\text{H2-H3}'} = 4.3$  Hz,  $^3J_{\text{H2-OH}} = 3.4$  Hz, 1H, H-2), 1.91 (ddd,  $^2J_{\text{H3-H3}'} = 14.6$  Hz,  $^3J_{\text{H3-H4}} = 9.0$  Hz,  $^3J_{\text{H3-H2}} = 7.9$  Hz, 1H, H-3), 1.88 (d,  $^3J_{\text{OH-H2}} = 3.4$  Hz, 1H, OH), 1.64 (dt,  $^2J_{\text{H3}'-H3} = 14.6$  Hz,  $^3J_{\text{H3}'-H2} = 4.0$  Hz,  $^3J_{\text{H3}'-H4} = 4.0$  Hz, 1H, H-3'), 1.38 (d,  $^3J_{\text{H5-H4}} = 6.1$  Hz, 3H, H-5), 1.25 (d,  $^3J_{\text{H1-H2}} = 6.2$  Hz, 3H, H-1) ppm.

**$^{13}\text{C NMR}$**  (101 MHz,  $\text{CDCl}_3$ , 25  $^\circ\text{C}$ )  $\delta$  90.8 (d,  $J = 162$  Hz, C-4), 66.2 (d,  $J = 4.4$  Hz, C-2), 45.8 (d,  $J = 19.1$  Hz, C-3), 23.4 (C-1), 21.4 (d,  $J = 22.7$  Hz, C-5) ppm.

**$^{19}\text{F NMR}$**  (470 MHz,  $\text{CDCl}_3$ , 25  $^\circ\text{C}$ )  $\delta$  -173.6 (ddqdd,  $^2J_{\text{F-H4}} = 49.5$  Hz,  $^3J_{\text{F-H3}'} = 34.7$  Hz,  $^3J_{\text{F-H5}} = 24.5$  Hz,  $^3J_{\text{F-H3}} = 13.6$  Hz,  $^1J_{\text{F}\cdots\text{OH}} = 6.6$  Hz) ppm.

**$^{19}\text{F}\{^1\text{H}\}$  NMR** (470 MHz,  $\text{CDCl}_3$ , 25  $^\circ\text{C}$ )  $\delta$  -173.4 (s, 1F) ppm.

**$^1\text{H NMR}$**  (500 MHz,  $\text{CDCl}_3$ , -50  $^\circ\text{C}$ )  $\delta$  4.94 (ddqd,  $^2J_{\text{H4-F}} = 49.8$  Hz,  $^3J_{\text{H4-H3}} = 9.9$  Hz,  $^3J_{\text{H4-H5}} = 6.2$  Hz,  $^3J_{\text{H4-H3}'} = 3.3$  Hz, 1H, H-4), 4.09 (dqdd,  $^3J_{\text{H2-H3}} = 8.6$  Hz,  $^3J_{\text{H2-H1}} = 6.2$  Hz,  $^3J_{\text{H2-H3}'} = 3.3$  Hz,  $^3J_{\text{H2-OH}} = 2.4$  Hz, 1H, H-2), 2.32 (dd,  $^1J_{\text{OH}\cdots\text{F}} = 9.9$  Hz,  $^3J_{\text{OH-H2}} = 2.4$  Hz, 1H, OH), 1.89 (dddd,  $^2J_{\text{H3-H3}'} = 14.8$  Hz,  $^3J_{\text{H3-F}} = 11.8$  Hz,  $^3J_{\text{H3-H4}} = 9.9$  Hz,  $^3J_{\text{H3-H2}} = 8.6$  Hz, 1H, H-3), 1.65 (ddt,  $^3J_{\text{H3}'-F} = 39.6$  Hz,  $^2J_{\text{H3}'-H3} = 14.8$  Hz,  $^3J_{\text{H3}'-H2} = 3.3$  Hz,  $^3J_{\text{H3}'-H4} = 3.3$  Hz, 1H, H-3'), 1.39 (dd,  $^3J_{\text{H5-F}} = 25.2$  Hz,  $^3J_{\text{H5-H4}} = 6.2$  Hz, 3H, H-5), 1.23 (d,  $^3J_{\text{H1-H2}} = 6.2$  Hz, 3H, H-1) ppm.

**$^1\text{H}\{^{19}\text{F}\}$  NMR** (500 MHz,  $\text{CDCl}_3$ , -50  $^\circ\text{C}$ )  $\delta$  4.94 (dq,  $^3J_{\text{H4-H3}} = 9.6$  Hz,  $^3J_{\text{H4-H5}} = 6.3$  Hz,  $^3J_{\text{H4-H3}'} = 3.2$  Hz, 1H, H-4), 4.09 (dqdd,  $^3J_{\text{H2-H3}} = 8.8$  Hz,  $^3J_{\text{H2-H1}} = 6.2$  Hz,  $^3J_{\text{H2-H3}'} = 3.4$  Hz,  $^3J_{\text{H2-OH}} = 2.6$  Hz, 1H, H-2), 2.32 (d,  $^3J_{\text{OH-H2}} = 2.4$  Hz, 1H, OH), 1.89 (ddd,  $^2J_{\text{H3-H3}'} = 14.7$  Hz,  $^3J_{\text{H3-H4}} = 9.8$  Hz,  $^3J_{\text{H3-H2}} = 8.5$  Hz, 1H, H-3), 1.65 (dt,  $^2J_{\text{H3}'-H3} = 14.7$  Hz,  $^3J_{\text{H3}'-H2} = 3.3$  Hz,  $^3J_{\text{H3}'-H4} = 3.3$  Hz, 1H, H-3'), 1.39 (d,  $^3J_{\text{H5-H4}} = 6.2$  Hz, 3H, H-5), 1.23 (d,  $^3J_{\text{H1-H2}} = 6.2$  Hz, 3H, H-1) ppm.

**$^{19}\text{F NMR}$**  (470 MHz,  $\text{CDCl}_3$ , -50  $^\circ\text{C}$ )  $\delta$  -173.7 (ddqdd,  $^2J_{\text{F-H4}} = 49.8$  Hz,  $^3J_{\text{F-H3}'} = 39.6$  Hz,  $^3J_{\text{F-H5}} = 25.2$  Hz,  $^3J_{\text{F-H3}} = 11.8$  Hz,  $^1J_{\text{F}\cdots\text{OH}} = 9.9$  Hz) ppm.

**$^{19}\text{F}\{^1\text{H}\}$  NMR** (470 MHz,  $\text{CDCl}_3$ , -50  $^\circ\text{C}$ )  $\delta$  -173.7 (s, 1F) ppm.

**HRMS** (EI) calcd for  $\text{C}_5\text{H}_{11}\text{OF}$   $[\text{M}]^+$ : 106.0788, found 106.0743.

**6.1.3.3 ( $\pm$ )-anti-4-fluoropentan-2-ol ( $\pm$ )-anti-A**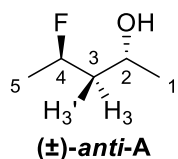

Starting from ( **$\pm$** )-anti-SI-3 (1.99 g, 8.87 mmol), using general procedure described above, ( **$\pm$** )-anti-A was obtained as a colorless oil (0.545 g, 5.13 mmol, 58%).

**IR** (neat) 3357(br), 2976(m), 2936(m), 1457(w), 1378(s), 1145(s), 1044(s), 912(m), 816(s)  $\text{cm}^{-1}$ .

**$^1\text{H NMR}$**  (500 MHz,  $\text{CDCl}_3$ , 25  $^\circ\text{C}$ )  $\delta$  4.95 (ddqdd,  $^2J_{\text{H4-F}} = 49.4$  Hz,  $^3J_{\text{H4-H3}} = 9.3$  Hz,  $^3J_{\text{H4-H5}} = 6.2$  Hz,  $^3J_{\text{H4-H3}'} = 2.7$  Hz,  $J = 0.3$  Hz, 1H, H-4), 4.09 (dqddd,  $^3J_{\text{H2-H3}'} = 9.3$  Hz,  $^3J_{\text{H2-H1}} = 6.3$  Hz,  $^3J_{\text{H2-OH}} = 4.9$  Hz,  $^3J_{\text{H2-H3}} = 3.1$  Hz,  $J = 0.3$  Hz, 1H, H-2), 1.77 (dddd,  $^3J_{\text{H3-F}} = 15.7$  Hz,  $^2J_{\text{H3-H3}'} = 14.7$  Hz,  $^3J_{\text{H3-H4}} = 9.3$  Hz,  $^3J_{\text{H3-H2}} = 3.1$  Hz,  $^4J_{\text{H3-OH}} = 0.5$  Hz, 1H, H-3), 1.62 (dddd,  $^3J_{\text{H3'-F}} = 36.0$  Hz,  $^2J_{\text{H3'-H3}} = 14.7$  Hz,  $^3J_{\text{H3'-H2}} = 9.4$  Hz,  $^3J_{\text{H3'-H4}} = 2.7$  Hz, 1H, H-3'), 1.56 (ddd,  $^3J_{\text{OH-H2}} = 4.9$  Hz,  $^1J_{\text{OH...F}} = 1.9$  Hz,  $^4J_{\text{OH-H3}} = 0.5$  Hz, 1H, OH), 1.37 (dd,  $^3J_{\text{H5-F}} = 24.0$  Hz,  $^3J_{\text{H5-H4}} = 6.2$  Hz, 3H, H-5), 1.25 (dd,  $^3J_{\text{H1-H2}} = 6.3$  Hz,  $^5J_{\text{H1-F}} = 0.4$  Hz, 3H, H-1) ppm.

**$^1\text{H}\{^{19}\text{F}\}$ NMR** (500 MHz,  $\text{CDCl}_3$ , 25  $^\circ\text{C}$ )  $\delta$  4.95 (dqdd,  $^3J_{\text{H4-H3}} = 9.0$  Hz,  $^3J_{\text{H4-H5}} = 6.2$  Hz,  $^3J_{\text{H4-H3}'} = 2.6$  Hz,  $J = 0.3$  Hz, 1H, H-4), 4.09 (dqdd,  $^3J_{\text{H2-H3}'} = 9.3$  Hz,  $^3J_{\text{H2-H1}} = 6.3$  Hz,  $^3J_{\text{H2-OH}} = 4.9$  Hz,  $^3J_{\text{H2-H3}} = 3.0$  Hz, 1H, H-2), 1.77 (dddd,  $^2J_{\text{H3-H3}'} = 14.7$  Hz,  $^3J_{\text{H3-H4}} = 9.4$  Hz,  $^3J_{\text{H3-H2}} = 3.0$  Hz,  $^4J_{\text{H3-OH}} = 0.5$  Hz, 1H, H-3), 1.62 (ddd,  $^2J_{\text{H3'-H3}} = 14.7$  Hz,  $^3J_{\text{H3'-H2}} = 9.3$  Hz,  $^3J_{\text{H3'-H4}} = 2.7$  Hz, 1H, H-3'), 1.56 (ddd,  $^3J_{\text{OH-H2}} = 4.9$  Hz,  $^4J_{\text{OH-H3}} = 0.5$  Hz, 1H, OH), 1.37 (d,  $^3J_{\text{H5-H4}} = 6.2$  Hz, 3H, H-5), 1.25 (d,  $^3J_{\text{H1-H2}} = 6.3$  Hz, 3H, H-1) ppm.

**$^{13}\text{C NMR}$**  (101 MHz,  $\text{CDCl}_3$ , 25  $^\circ\text{C}$ )  $\delta$  88.3 (d,  $J = 163$  Hz, C-4), 64.3 (d,  $J = 2.9$  Hz, C-2), 45.9 (d,  $J = 19.8$  Hz, C-3), 24.0 (C-1), 21.3 (d,  $J = 22.7$  Hz, C-5) ppm.

**$^{19}\text{F NMR}$**  (470 MHz,  $\text{CDCl}_3$ , 25  $^\circ\text{C}$ )  $\delta$  -175.4 (ddqdd,  $^2J_{\text{F-H4}} = 49.4$  Hz,  $^3J_{\text{F-H3}'} = 36.0$  Hz,  $^3J_{\text{F-H5}} = 24.0$  Hz,  $^3J_{\text{F-H3}} = 15.7$  Hz,  $^1J_{\text{F...OH}} = 1.9$  Hz, ( $^5J_{\text{F-H1}} = 0.40$  Hz not resolved)) ppm.

**$^{19}\text{F}\{^1\text{H}\}$  NMR** (470 MHz,  $\text{CDCl}_3$ , 25  $^\circ\text{C}$ )  $\delta$  -175.4 (s, 1F) ppm.

**$^1\text{H NMR}$**  (500 MHz,  $\text{CDCl}_3$ , -50  $^\circ\text{C}$ )  $\delta$  4.95 (ddqd,  $^2J_{\text{H4-F}} = 49.7$  Hz,  $^3J_{\text{H4-H3}} = 9.9$  Hz,  $^3J_{\text{H4-H5}} = 6.3$  Hz,  $^3J_{\text{H4-H3}'} = 2.3$  Hz, H-4), 4.10 (dqdd,  $^3J_{\text{H2-H3}'} = 10.0$  Hz,  $^3J_{\text{H2-H1}} = 6.3$  Hz,  $^3J_{\text{H2-OH}} = 4.7$  Hz,  $^3J_{\text{H2-H3}} = 2.5$  Hz, 1H, H-2), 1.78 (ddd,  $^3J_{\text{OH-H2}} = 4.7$  Hz,  $^1J_{\text{OH...F}} = 1.8$  Hz,  $^4J_{\text{OH-H3}} = 0.7$  Hz, 1H, OH), 1.76 (dddd appears as tddd,  $^3J_{\text{H3-F}} = 14.7$  Hz,  $^2J_{\text{H3-H3}'} = 14.7$  Hz,  $^3J_{\text{H3-H4}} = 9.9$  Hz,  $^3J_{\text{H3-H2}} = 2.5$  Hz,  $^4J_{\text{H3-OH}} = 0.7$  Hz, 1H, H-3), 1.60 (dddd,  $^3J_{\text{H3'-F}} = 39.1$  Hz,  $^2J_{\text{H3'-H3}} = 14.9$  Hz,  $^3J_{\text{H3'-H2}} = 10.0$  Hz,  $^3J_{\text{H3'-H4}} = 2.3$  Hz, 1H, H-3'), 1.37 (dd,  $^3J_{\text{H5-F}} = 24.5$  Hz,  $^3J_{\text{H5-H4}} = 6.3$  Hz, 3H, H-5), 1.24 (d,  $^3J_{\text{H1-H2}} = 6.3$  Hz, 3H, H-1) ppm.

**$^1\text{H}\{^{19}\text{F}\}$  NMR** (500 MHz,  $\text{CDCl}_3$ , -50  $^\circ\text{C}$ )  $\delta$  4.98 (dq,  $^3J_{\text{H4-H3}} = 10.0$  Hz,  $^3J_{\text{H4-H5}} = 6.2$  Hz,  $^3J_{\text{H4-H3}'} = 2.1$  Hz, H-4), 4.11 (dqdd,  $^3J_{\text{H2-H3}'} = 10.0$  Hz,  $^3J_{\text{H2-H1}} = 6.3$  Hz,  $^3J_{\text{H2-OH}} = 4.7$  Hz,  $^3J_{\text{H2-H3}} = 2.5$  Hz, 1H, H-2), 1.78 (dd,  $^3J_{\text{OH-H2}} = 4.7$  Hz,  $^4J_{\text{OH-H3}} = 0.7$  Hz, 1H, OH), 1.76 (dddd,  $^2J_{\text{H3-H3}'} = 14.6$  Hz,  $^3J_{\text{H3-H4}} = 9.9$  Hz,  $^3J_{\text{H3-H2}} = 2.6$  Hz,  $^4J_{\text{H3-OH}} = 0.7$  Hz, 1H, H-3), 1.60 (ddd,  $^2J_{\text{H3'-H3}} = 14.8$  Hz,  $^3J_{\text{H3'-H2}} = 10.0$  Hz,  $^3J_{\text{H3'-H4}} = 2.4$  Hz, 1H, H-3'), 1.37 (d,  $^3J_{\text{H5-H4}} = 6.4$  Hz, 3H, H-5), 1.24 (d,  $^3J_{\text{H1-H2}} = 6.2$  Hz, 3H, H-1) ppm.

**$^{19}\text{F NMR}$**  (470 MHz,  $\text{CDCl}_3$ , -50  $^\circ\text{C}$ )  $\delta$  -176.4 (ddqdd,  $^2J_{\text{F-H4}} = 49.7$  Hz,  $^3J_{\text{F-H3}'} = 39.1$  Hz,  $^3J_{\text{F-H5}} = 24.5$  Hz,  $^3J_{\text{F-H3}} = 14.7$  Hz,  $^1J_{\text{F...OH}} = 1.8$  Hz) ppm.

**$^{19}\text{F}\{^1\text{H}\}$  NMR** (470 MHz,  $\text{CDCl}_3$ , -50  $^\circ\text{C}$ )  $\delta$  -176.4 (s, 1F) ppm.

**HRMS** (EI) calcd for  $\text{C}_5\text{H}_{11}\text{OF}$   $[\text{M}]^+$  106.0788, found 106.0745.

## 6.2 Synthesis of (±)-4-fluorobutan-2-ol (±)-B

### 6.2.1 Synthesis of 3-fluoropropanal SI-5

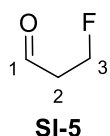

Trichloroisocyanuric acid (4.58 g, 19.7 mmol, 0.37 equiv) was added to a vigorously stirred mixture of 3-fluoropropan-1-ol (4.0 mL, 53.3 mmol, 1 equiv), NaHCO<sub>3</sub> (4.46 g, 53.3 mmol, 1 equiv), and TEMPO (0.091 g, 0.586 mmol, 1.1 mol%) in CH<sub>2</sub>Cl<sub>2</sub> (80 mL) and water (2.7 mL). The temperature was kept at 20–25 °C (water bath). After completion of the addition, stirring was continued until the orange color faded to a pale yellow ( $\pm$  30 min). The resulting solution was decanted from the gummy white residue, filtered through a pad of silica gel (1.33 g), and dried over MgSO<sub>4</sub> (2.66 g) for 30 min. This provided a solution of 3-fluoropropanal in CH<sub>2</sub>Cl<sub>2</sub>, the concentration of which was determined by <sup>1</sup>H-NMR using the formula: [3-fluoropropanal] = (integral of  $\delta$  9.83)/(integral of  $\delta$  5.28)\*32. This procedure provided an approximately 0.4 M solution of 3-fluoropropanal **SI-5** in CH<sub>2</sub>Cl<sub>2</sub>, which was used without further purification.

<sup>1</sup>H NMR (400 MHz, CDCl<sub>3</sub>)  $\delta$  9.84 (td, <sup>3</sup>J<sub>HH</sub> = 1.5, <sup>4</sup>J<sub>HF</sub> = 1.2 Hz, 1H, H-1), 4.81 (dt, <sup>2</sup>J<sub>HF</sub> = 46.5, <sup>3</sup>J<sub>HH</sub> = 5.9 Hz, 2H, H-3), 2.86 (dtd, <sup>3</sup>J<sub>HF</sub> = 25.7, <sup>3</sup>J<sub>HH</sub> = 5.9, <sup>3</sup>J<sub>HH</sub> = 1.5 Hz, 2H, H-2) ppm. The spectral data matched with the literature.<sup>4</sup> <sup>19</sup>F NMR (376 MHz, CDCl<sub>3</sub>)  $\delta$  -221.2 (tt, <sup>2</sup>J<sub>HF</sub> = 46.5, <sup>3</sup>J<sub>HF</sub> = 25.7 Hz, 1F) ppm (<sup>4</sup>J<sub>HF</sub> not visible).

### 6.2.2 Synthesis of (±)-4-fluorobutan-2-ol (±)-B

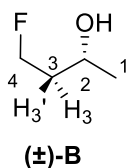

To a solution of **SI-5** in CH<sub>2</sub>Cl<sub>2</sub> (0.4 M, 20 mL, 8 mmol, 1 equiv) at -78 °C was added dropwise a solution of MeMgBr in Et<sub>2</sub>O (3 M, 2.8 mL, 8.4 mmol, 1.05 equiv) and the resulting mixture was stirred at -78 °C for 1.5 h. The reaction mixture was then quenched with sat. aq. NH<sub>4</sub>Cl (15 mL) and allowed to warm to room temperature. Et<sub>2</sub>O (25 mL) was added and layers were separated. The aqueous phase was extracted with Et<sub>2</sub>O (2  $\times$  45 mL) then the combined organic layers were dried (MgSO<sub>4</sub>), filtered and evaporated at 31 °C for  $\approx$ 670 mbar. The crude product was purified by column chromatography on silica gel eluting with pentane/Et<sub>2</sub>O (80:20 to 70:30) to give after evaporation (±)-4-fluorobutan-2-ol (**(±)-B**) together with pentane and Et<sub>2</sub>O. The mass of product was calculated by <sup>1</sup>H NMR to give  $\approx$ 460 mg (4.99 mmol, 62%). This fraction was combined with another fraction obtained similarly from a 25.7 mmol scale reaction and pentane and Et<sub>2</sub>O were distilled off to give 663 mg (7.20 mmol, 21%) of pure (±)-4-fluorobutan-2-ol (**(±)-B**) as a pale yellow oil.

R<sub>f</sub> 0.13 (CH<sub>2</sub>Cl<sub>2</sub>). IR (neat) 3355 (br m), 2971 (m), 1377 (w), 1137 (m), 1041 (s) cm<sup>-1</sup>.

<sup>1</sup>H NMR (500 MHz, CDCl<sub>3</sub>, 25 °C)  $\delta$  4.66 (dddd, <sup>2</sup>J<sub>H4-F</sub> = 47.2, <sup>2</sup>J<sub>H4-H4'</sub> = 9.3, <sup>3</sup>J<sub>H4-H3</sub> = 7.5, <sup>3</sup>J<sub>H4-H3'</sub> = 4.6, J<sub>HH</sub> = 0.3 Hz, 1H, H-4), 4.59 (dddd, <sup>2</sup>J<sub>H4'-F</sub> = 47.2, <sup>2</sup>J<sub>H4'-H4</sub> = 9.3, <sup>3</sup>J<sub>H4'-H3'</sub> = 6.0, <sup>3</sup>J<sub>H4'-H3</sub> = 5.0, J<sub>HH</sub> = 0.3 Hz, 1H, H-4'), 4.10 – 4.02 (m, 1H, H-2), 1.88 (dddd, <sup>3</sup>J<sub>H3'-F</sub> = 25.0, <sup>2</sup>J<sub>H3'-H3</sub> = 14.8, <sup>3</sup>J<sub>H3'-H4</sub> = 7.5, <sup>3</sup>J<sub>H3'-H4'</sub> = 5.0, <sup>3</sup>J<sub>H3'-H2</sub> = 4.3, <sup>4</sup>J<sub>H3'-HO</sub> = 0.3 Hz, 1H, H-3'), 1.82 (dddd, <sup>3</sup>J<sub>H3-F</sub> = 29.3, <sup>2</sup>J<sub>H3-H3'</sub> = 14.8, <sup>3</sup>J<sub>H3-H2</sub> = 8.1, <sup>3</sup>J<sub>H3-H4'</sub> = 6.0, <sup>3</sup>J<sub>H3-H4</sub> = 4.6 Hz, 1H, H-3), 1.54 (ddd, <sup>3</sup>J<sub>OH-H2</sub> = 4.5, <sup>1h</sup>J<sub>OH...F</sub> = 2.2, <sup>4</sup>J<sub>OH-H3'</sub> = 0.3 Hz, 1H, OH), 1.27 (dd, <sup>3</sup>J<sub>H1-H2</sub> = 6.3, <sup>5</sup>J<sub>H1-F</sub> = 0.5 Hz, 3H, H-1) ppm.

<sup>1</sup>H{<sup>19</sup>F} NMR (500 MHz, CDCl<sub>3</sub>, 25 °C)  $\delta$  4.66 (dddd, <sup>2</sup>J<sub>H4-H4'</sub> = 9.3, <sup>3</sup>J<sub>H4-H3</sub> = 7.5, <sup>3</sup>J<sub>H4-H3'</sub> = 4.6, J<sub>HH</sub> = 0.3 Hz, 1H, H-4), 4.59 (dddd, <sup>2</sup>J<sub>H4'-H4</sub> = 9.3, <sup>3</sup>J<sub>H4'-H3'</sub> = 6.0, <sup>3</sup>J<sub>H4'-H3</sub> = 5.0, J<sub>HH</sub> = 0.3 Hz, 1H, H-4'), 4.10 – 4.02 (m, 1H, H-2), 1.88 (dddd, <sup>2</sup>J<sub>H3'-H3</sub> = 14.8, <sup>3</sup>J<sub>H3'-H4</sub> = 7.5, <sup>3</sup>J<sub>H3'-H4'</sub> = 5.0, <sup>3</sup>J<sub>H3'-H2</sub> = 4.3, J<sub>H3'-HO</sub> = 0.3 Hz, 1H, H-3'), 1.82 (dddd, <sup>2</sup>J<sub>H3-H3'</sub> = 14.8, <sup>3</sup>J<sub>H3-H2</sub> = 8.1, <sup>3</sup>J<sub>H3-H4'</sub> = 6.0, <sup>3</sup>J<sub>H3-H4</sub> = 4.6 Hz, 1H, H-3), 1.54 (dd, <sup>3</sup>J<sub>H2-OH</sub> = 4.5, J<sub>OH-H3'</sub> = 0.3 Hz, 1H, OH), 1.27 (d, <sup>3</sup>J<sub>H1-H2</sub> = 6.3, 3H, H-1) ppm.

<sup>13</sup>C NMR (101 MHz, CDCl<sub>3</sub>, 25 °C)  $\delta$  81.9 (d, <sup>1</sup>J<sub>CF</sub> = 162.1 Hz, C-4), 65.0 (d, <sup>3</sup>J<sub>CF</sub> = 4.4 Hz, C-2), 39.3 (d, <sup>2</sup>J<sub>CF</sub> = 19.1 Hz, C-3), 23.7 (s, C-1) ppm.

<sup>19</sup>F NMR (470 MHz, CDCl<sub>3</sub>, 25 °C)  $\delta$  -220.8 (tdddq, <sup>2</sup>J<sub>F-H4</sub> = 47.2, <sup>2</sup>J<sub>F-H3'</sub> = 29.3, <sup>2</sup>J<sub>F-H3</sub> = 25.0, <sup>1h</sup>J<sub>F...HO</sub> = 2.2, <sup>5</sup>J<sub>F-H1</sub> = 0.5 Hz, 1F) ppm.

<sup>19</sup>F{<sup>1</sup>H} NMR (470 MHz, CDCl<sub>3</sub>, 25 °C)  $\delta$  -220.8 (s, 1F) ppm.

### 6.3 Synthesis of 3-fluoro-2,2-dimethylpropan-1-ol **C**

#### 6.3.1 Synthesis of 3-fluoro-2,2-dimethyl-1-(*meta*-methylbenzoyloxy)-propane **SI-6**

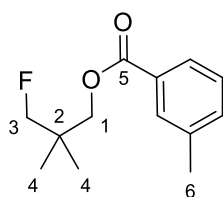

**SI-6**

In a microwave tube under argon was placed neopentyl glycol (208 mg, 2.0 mmol, 1 equiv) and dry diglyme (2.5 mL) and the mixture was gently heated until complete dissolution. DFMBBA (852 mg, 4.0 mmol, 2 equiv) and NaF (84 mg, 2.0 mmol, 1 equiv) were then added and the resulting mixture was heated at 200 °C under microwave irradiation for 5 min. The mixture was then diluted with Et<sub>2</sub>O (60 mL), washed successively with sat. aq. NaHCO<sub>3</sub> (20 mL), 1 M aq. HCl (20 mL) and sat. aq. NaHCO<sub>3</sub> (10 mL) then dried (MgSO<sub>4</sub>), filtered and concentrated. Column chromatography eluting with petroleum ether 40-60 °C/Et<sub>2</sub>O (99:1 to 98:2) afforded 387 mg (1.73 mmol, 86%) of the desired fluoroester

**SI-6** as a colorless oil.

<sup>1</sup>H NMR (400 MHz, CDCl<sub>3</sub>, 25 °C) δ 7.89 – 7.81 (m, 2H, H<sub>Ar</sub>), 7.43 – 7.30 (m, 2H, H<sub>Ar</sub>), 4.30 (d, <sup>2</sup>J<sub>H3-F</sub> = 47.7 Hz, 2H, H-3), 4.18 (d, <sup>4</sup>J<sub>H1-F</sub> = 1.0 Hz, 2H, H-1), 2.42 (s, 3H, H-6), 1.08 (d, <sup>4</sup>J<sub>H4-F</sub> = 1.7 Hz, 6H, H-4) ppm. <sup>13</sup>C NMR (101 MHz, CDCl<sub>3</sub>, 25 °C) δ 166.5 (C-5), 138.2 (C<sub>q,Ar</sub>), 133.8 (CH<sub>Ar</sub>), 130.11 (C<sub>q,Ar</sub>), 130.06 (CH<sub>Ar</sub>), 128.3 (CH<sub>Ar</sub>), 126.6 (CH<sub>Ar</sub>), 88.2 (d, <sup>1</sup>J<sub>C3-F</sub> = 173.9 Hz, C-3), 68.9 (d, <sup>3</sup>J<sub>C1-F</sub> = 3.7 Hz, C-1), 36.0 (d, <sup>2</sup>J<sub>C2-F</sub> = 16.9 Hz, C-2), 21.3 (C-6), 20.8 (d, <sup>3</sup>J<sub>C4-F</sub> = 5.1 Hz, C-4) ppm. <sup>19</sup>F NMR (376 MHz, CDCl<sub>3</sub>, 25 °C) δ -226.5 (br t, <sup>2</sup>J<sub>F-H3</sub> = 47.7 Hz) ppm. The spectral data matched with the literature.<sup>3</sup>

#### 6.3.2 Synthesis of 3-fluoro-2,2-dimethylpropan-1-ol **C**

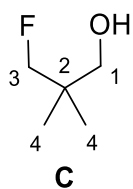

**C**

To a solution of **SI-6** (900 mg, 4.01 mmol, 1 equiv) in dry Et<sub>2</sub>O (8 mL) was added a solution of MeONa (25% wt, 1.84 mL, 8.02 mmol, 2 equiv). After being stirred at room temperature for 22.5 h, the reaction was neutralized with aq. HCl (1.0 M, 8 mL) and extracted with Et<sub>2</sub>O (3 × 24 mL). The combined organic phases were dried and filtered. The Et<sub>2</sub>O was distilled off at 50 °C and the crude product was purified by column chromatography on silica gel eluting with CH<sub>2</sub>Cl<sub>2</sub> to give after evaporation at ≈ 750 mbar and 28 °C, 290 mg (2.73 mmol, 68%) of the desired product **C** as a

white solid.

R<sub>f</sub> 0.21 (CH<sub>2</sub>Cl<sub>2</sub>)

<sup>1</sup>H NMR (500 MHz, CDCl<sub>3</sub>, 25 °C) δ 4.24 (d, <sup>2</sup>J<sub>H3-F</sub> = 47.8 Hz, 2H, H-3), 3.48 (dd, <sup>3</sup>J<sub>H1-OH</sub> = 5.9, <sup>4</sup>J<sub>H1-F</sub> = 1.3 Hz, 2H, H-1), 1.45 (td, <sup>3</sup>J<sub>OH-H1</sub> = 5.9, <sup>1H</sup>J<sub>OH...F</sub> = 1.7 Hz, 1H, OH), 0.95 (d, <sup>4</sup>J<sub>H4-F</sub> = 1.8 Hz, 6H, H-4) ppm.

<sup>1</sup>H{<sup>19</sup>F} NMR (500 MHz, CDCl<sub>3</sub>, 25 °C) δ 4.24 (s, 2H, H-3), 3.48 (d, <sup>3</sup>J<sub>H1-OH</sub> = 5.9 Hz, 2H, H-1), 1.45 (t, <sup>3</sup>J<sub>OH-H1</sub> = 5.9 Hz, 1H, OH), 0.95 (s, 6H, H-4) ppm.

<sup>13</sup>C NMR (101 MHz, CDCl<sub>3</sub>, 25 °C) δ 89.0 (d, <sup>1</sup>J<sub>C3-F</sub> = 171.7 Hz, C-3), 68.4 (d, <sup>3</sup>J<sub>C1-F</sub> = 3.7 Hz, C-1), 36.9 (d, <sup>2</sup>J<sub>C2-F</sub> = 16.9 Hz, C-2), 20.3 (d, <sup>3</sup>J<sub>C4-F</sub> = 5.1 Hz, C-4) ppm.

<sup>19</sup>F NMR (470 MHz, CDCl<sub>3</sub>, 25 °C) δ -226.4 – -226.6(m, <sup>2</sup>J<sub>F-H3</sub> = 47.8, 1F) ppm.

<sup>19</sup>F{<sup>1</sup>H} NMR (470 MHz, CDCl<sub>3</sub>, 25 °C) δ -226.5 (s, 1F) ppm.

## 6.4 Synthesis of (±)-4,4-difluoropentane-2-ol (±)-E

### 6.4.1 Synthesis of 4,6-dimethyl-2-phenyl-1,3-dioxane *meso*-SI-7 and (±)-SI-8

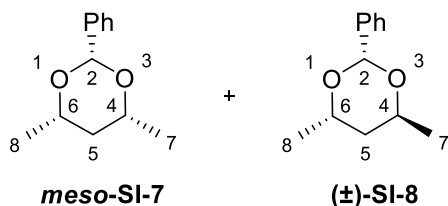

A solution of benzaldehyde (10.1 g, 96.0 mmol, 1 equiv), a mixture of the 2,4-pentanediol diastereomers (10.0 g, 96.0 mmol, 1 equiv), and *p*-toluenesulfonic acid monohydrate (193 mg, 0.96 mmol, 1 mol%) in dry toluene (200 mL) was heated at reflux with a Dean-Stark trap for 6 h. After cooling, the solution was diluted with 80 mL of Et<sub>2</sub>O and washed with sat. aq. NaHCO<sub>3</sub> (80 mL). The aqueous layer was extracted with Et<sub>2</sub>O (2 × 80 mL), and the combined organic extracts were dried over

MgSO<sub>4</sub>, filtered, and concentrated under vacuum to give 19.0 g of the crude acetal mixture together with 7% of toluene which was used without further purification.

**R<sub>f</sub>** 0.76 (petroleum ether 40–60 °C/Et<sub>2</sub>O 80:20). **<sup>1</sup>H NMR** (400 MHz, CDCl<sub>3</sub>) δ 7.48 – 7.56 (m, 4H, H<sub>Ar</sub>), 7.40 – 7.29 (m, 6H, H<sub>Ar</sub>), 5.84 (s, 1H, H-2 (±)), 5.54 (s, 1H, H-2 *meso*), 4.48 (app. quin, *J* = 6.8 Hz, 1H, H-4 (±)), 4.20 (dq, *J* = 11.9, 6.1, 2.4 Hz, 1H, H-6 (±)), 3.96 (dq, *J* = 11.3, 6.1, 2.4 Hz, 2H, H-4 + H-6 *meso*), 2.01 (ddd, *J* = 13.2, 12.0, 6.1 Hz, 1H, H-5<sub>ax</sub> (±)), 1.63 (dt, *J* = 13.2, 2.4 Hz, 1H, H-5<sub>eq</sub> *meso*), 1.50 (d, *J* = 6.8 Hz, 3H, H-8 (±)), 1.45 (ddd, *J* = 13.2, 2.4, 1 Hz, 1H, H-5<sub>eq</sub> (±)), 1.41 (dt, *J* = 13.2, 11.3 Hz, H-5<sub>ax</sub> *meso*), 1.32 (d, *J* = 6.1 Hz, 6H, H-7 + H-8 *meso*), 1.30 (d, *J* = 6.1 Hz, 3H, H-7 (±)) ppm. **<sup>13</sup>C NMR** (101 MHz, CDCl<sub>3</sub>, 25 °C) δ 139.1 (C<sub>q,Ar</sub> (±)), 138.9 (C<sub>q,Ar</sub> *meso*), 128.6 (2 × CH<sub>Ar</sub>), 128.2 (4 × CH<sub>Ar</sub>), 126.22 (2 × CH<sub>Ar</sub>), 126.17 (2 × CH<sub>Ar</sub>), 100.9 (C-2 *meso*), 94.0 (C-2 (±)), 73.0 (2C, C-4 + C-6 *meso*), 68.6 (C-6 (±)), 68.0 (C-4 (±)), 40.3 (C-5 *meso*), 36.7 (C-5 (±)), 21.9 (C-8 (±)), 21.6 (2C, C-7 + C-8 *meso*), 17.2 (C-7 (±)) ppm. The spectral data matched with the literature.<sup>5</sup>

### 6.4.2 Synthesis of (2*S*\*,4*R*\*)-4-benzyloxypentane-2-ol (±)-*syn*-SI-9 and (2*R*\*,4*R*\*)-4-benzyloxypentane-2-ol (±)-*anti*-SI-10

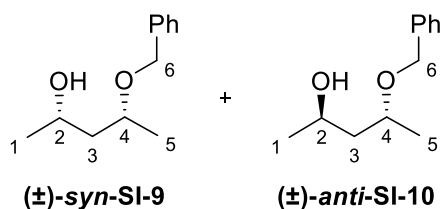

Diisobutylaluminium hydride (1.0 M in hexane, 52 mL, 52 mmol, 2 equiv) was added dropwise to a solution of the crude mixture of *meso*-SI-7 and (±)-SI-8 obtained above in dry CH<sub>2</sub>Cl<sub>2</sub> at 0 °C. After stirring at 0 °C for 2 h and then at room temperature for 17 h, EtOAc (150 mL) was added at 0 °C. After stirring for 0.5 h, aq. NaOH (3 M, 300 mL) and Et<sub>2</sub>O (125 mL) were added. The phases were separated and the aqueous phase was extracted with Et<sub>2</sub>O (3 × 125 mL). The combined organic phases were

washed with brine (150 mL), dried (MgSO<sub>4</sub>) and concentrated. Column chromatography on silica gel (pentane/Et<sub>2</sub>O 80:20 to 40:60) gave 1.17 g (6.02 mmol, 23%) of a mixture of the desired alcohols as a colorless oil. A second fraction consisting of 2.73 g of the corresponding 2-*O*-acetylated products was treated with a catalytic amount of MeONa in dry MeOH for 21.5 h. The reaction mixture was neutralized with Amberlite IR120 and evaporated to give 2.29 g (11.6 mmol, 44%) of a mixture of the desired alcohols (±)-*syn*-SI-9 and (±)-*anti*-SI-10 as a colorless oil leading to a combined yield of 67%.

**R<sub>f</sub>** 0.12 (petroleum ether 40–60 °C/Et<sub>2</sub>O 80:20). **<sup>1</sup>H NMR** (400 MHz, CDCl<sub>3</sub>, 25 °C) δ 7.40 – 7.28 (m, 10H, H<sub>Ar</sub>), 4.68 (d, *J* = 11.5 Hz, 1H, H-6 SI-9), 4.64 (d, *J* = 11.5 Hz, 1H, H-6 SI-10), 4.47 (d, *J* = 11.5 Hz, 1H, H-6' SI-10), 4.44 (d, *J* = 11.5 Hz, 1H, H-6 SI-9), 4.19 – 4.08 (m, 1H, H-2 or H-4 SI-10), 4.04 – 3.95 (m, 1H, H-2 or H-4 SI-9), 3.92 – 3.77 (m, 2H, H-2 or H-4, SI-9 + SI-10), 3.64 (br. s, 1H, OH SI-9), 2.71 (dd, *J* = 3.4, 2.0 Hz, 1H, OH SI-10), 1.76 – 1.53 (m, 4H, 2 × H-3, SI-9 + SI-10), 1.28 (d, *J* = 6.1 Hz, 3H, H-1 or H-5, SI-10), 1.25 (d, *J* = 6.1 Hz, 3H, H-1 or H-5, SI-9), 1.19 (d, *J* = 6.4 Hz, 3H, H-1 or H-5, SI-10), 1.16 (d, *J* = 6.1 Hz, 3H, H-1 or H-5, SI-9) ppm. **<sup>13</sup>C NMR** (101 MHz, CDCl<sub>3</sub>, 25 °C) δ 138.4 (C<sub>q,Ar</sub> SI-10), 138.0 (C<sub>q,Ar</sub> SI-9), 128.5 (CH<sub>Ar</sub>), 128.4 (CH<sub>Ar</sub>), 127.8 (CH<sub>Ar</sub>), 127.75 (CH<sub>Ar</sub>), 127.73 (CH<sub>Ar</sub>), 127.67 (CH<sub>Ar</sub>), 76.0 (C-2 or C-4, SI-9), 72.7 (C-2 or C-4, SI-10), 70.6 (C-6 SI-10), 70.3 (C-6 SI-9), 67.8 (C-2 or C-4, SI-9), 64.6 (C-2 or C-4, SI-10), 45.7 (C-3 SI-9), 44.4 (C-3 SI-10), 23.5 (2C, C-1, SI-9 + SI-10), 19.6 (C-5, SI-9), 19.1 (C-5, SI-10) ppm. The spectral data matched with the literature.<sup>6</sup>

### 6.4.3 Synthesis of ( $\pm$ )-4-benzyloxypentan-2-one ( $\pm$ )-SI-11

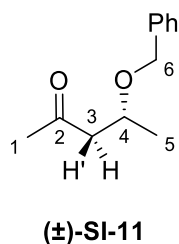

To a solution of a mixture of alcohols ( $\pm$ )-*syn*-SI-9 and ( $\pm$ )-*anti*-SI-10 (290 mg, 1.49 mmol, 1 equiv) in CH<sub>2</sub>Cl<sub>2</sub> was added Dess-Martin periodinane (760 mg, 1.79 mmol, 1.2 equiv). The reaction mixture was stirred at room temperature for 1.5 h then quenched with sat. aq. Na<sub>2</sub>SO<sub>3</sub> (1.5 mL), followed by sat. aq. NaHCO<sub>3</sub> (6.5 mL). Et<sub>2</sub>O (9 mL) was added and the phases were separated. The aqueous phase was extracted with Et<sub>2</sub>O (2 × 16 mL) then the combined organic phases were dried (MgSO<sub>4</sub>) and concentrated. Column chromatography on silica gel eluting with petroleum ether 40–60 °C/Et<sub>2</sub>O (80:20 to 70:30) gave 240 mg (1.25 mmol, 84%) of the desired product ( $\pm$ )-SI-11 as a colorless oil.

**R<sub>f</sub>** 0.41 (petroleum ether 40–60 °C/Et<sub>2</sub>O 70:30). **<sup>1</sup>H NMR** (400 MHz, CDCl<sub>3</sub>, 25 °C)  $\delta$  7.37 – 7.25 (m, 5H, H<sub>Ar</sub>), 4.58 (d, <sup>2</sup>J<sub>H6-H6'</sub> = 11.5 Hz, 1H, H-6), 4.46 (d, <sup>2</sup>J<sub>H6-H6'</sub> = 11.5 Hz, 1H, H-6'), 4.05 (dq, <sup>3</sup>J<sub>H4-H3</sub> = 7.3, <sup>3</sup>J<sub>H4-H5</sub> = 6.1, <sup>3</sup>J<sub>H4-H3'</sub> = 5.4 Hz, 1H, H-4), 2.81 (dd, <sup>2</sup>J<sub>H3-H3'</sub> = 15.9, <sup>3</sup>J<sub>H3-H4</sub> = 7.3 Hz, 1H, H-3), 2.49 (dd, <sup>2</sup>J<sub>H3'-H3</sub> = 15.9, <sup>3</sup>J<sub>H3'-H4</sub> = 5.4 Hz, 1H, H-3'), 2.17 (s, 3H, H-1), 1.25 (d, <sup>3</sup>J<sub>H5-H4</sub> = 6.1 Hz, 3H, H-5) ppm. **<sup>13</sup>C NMR** (101 MHz, CDCl<sub>3</sub>, 25 °C)  $\delta$  207.4 (C-2), 138.5 (C<sub>q,Ar</sub>), 128.3 (2 × CH<sub>Ar</sub>), 127.7 (2 × CH<sub>Ar</sub>), 127.6 (CH<sub>Ar</sub>), 71.6 (C-4), 70.8 (C-6), 50.8 (C-3), 31.0 (C-1), 19.8 (C-5) ppm. The spectral data matched with the literature.<sup>7</sup>

### 6.4.4 Synthesis of ( $\pm$ )-2-benzyloxy-4,4-difluoropentane ( $\pm$ )-SI-12

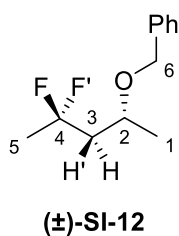

To a solution of ( $\pm$ )-SI-11 (230 mg, 1.20 mmol, 1 equiv) in CH<sub>2</sub>Cl<sub>2</sub> (1.5 mL) was added diethylaminosulfur trifluoride (0.47 mL, 3.59 mmol, 3 equiv) at 0 °C and the resulting mixture was stirred at room temperature for 23 h then at 40 °C for 8 h after which some starting material could still be observed by TLC. HF-pyridine complex (3 drops) was added and the reaction mixture was stirred at 40 °C for 14 h then diluted with CH<sub>2</sub>Cl<sub>2</sub> (25 mL) and quenched with sat. aq. NaHCO<sub>3</sub> (12 mL). The phases were separated and the aqueous phase was extracted with CH<sub>2</sub>Cl<sub>2</sub> (2 × 25 mL). The combined organic phases were dried (MgSO<sub>4</sub>) and concentrated.

Column chromatography on silica gel eluting with petroleum ether 40–60 °C/Et<sub>2</sub>O (98:2 to 70:30) gave 127 mg (0.59 mmol, 49%) of desired product ( $\pm$ )-SI-12 as a pale yellow oil followed by 85 mg (0.44 mmol, 37%) of starting material.

**R<sub>f</sub>** 0.89 (petroleum ether 40–60 °C/Et<sub>2</sub>O 70:30). **IR** (neat) 2973 (w), 2935 (w), 2871 (w), 1392(m), 1376 (m), 1235 (m), 1148 (s), 1129 (s), 917 (s). **<sup>1</sup>H NMR** (400 MHz, CDCl<sub>3</sub>, 25 °C)  $\delta$  7.39 – 7.28 (m, 5H, H<sub>Ar</sub>), 4.59 (d, <sup>2</sup>J<sub>H6-H6'</sub> = 11.5 Hz, 1H, H-6), 4.47 (d, <sup>2</sup>J<sub>H6-H6'</sub> = 11.5 Hz, 1H, H-6'), 3.90 – 3.80 (m, 1H, H-2), 2.22 (dddd, <sup>3</sup>J<sub>H3-F</sub> = 19.8, <sup>2</sup>J<sub>H3-H3'</sub> = 14.7, <sup>3</sup>J<sub>H3-F</sub> = 14.7, <sup>3</sup>J<sub>H3-H2</sub> = 7.1 Hz, 1H, H-3'), 2.09 – 1.94 (m, 1H, H-3'), 1.65 (t, <sup>3</sup>J<sub>H5-F</sub> = 19.0 Hz, 3H, H-5), 1.30 (d, <sup>3</sup>J<sub>H1-H2</sub> = 6.1 Hz, 3H, H-1) ppm. **<sup>13</sup>C NMR** (101 MHz, CDCl<sub>3</sub>, 25 °C)  $\delta$  138.4 (C<sub>q,Ar</sub>), 128.4 (2 × CH<sub>Ar</sub>), 127.7 (2 × CH<sub>Ar</sub>), 127.6 (CH<sub>Ar</sub>), 123.5 (t, <sup>1</sup>J<sub>C4-F</sub> = 237.7 Hz, C-4), 70.53 (C-6), 70.5 (dd, <sup>2</sup>J<sub>C2-F</sub> = 7.3, 3.7 Hz, C-2), 44.9 (t, <sup>2</sup>J<sub>C3-F</sub> = 24.9 Hz, C-3), 24.1 (t, <sup>2</sup>J<sub>C5-F</sub> = 27.5 Hz, C-5), 20.4 (d, <sup>4</sup>J<sub>C1-F</sub> = 1.5 Hz, C-1) ppm. **<sup>19</sup>F NMR** (376 MHz, CDCl<sub>3</sub>, 25 °C)  $\delta$  –85.0 (dqdd, <sup>2</sup>J<sub>F-F'</sub> = 242.3, <sup>3</sup>J<sub>F-H5</sub> = 19.0, <sup>3</sup>J<sub>F-H3/H3'</sub> = 14.7, <sup>3</sup>J<sub>F-H3/H3'</sub> = 13.0 Hz, 1F, F), –90.2 (m, <sup>2</sup>J<sub>F-F'</sub> = 242.3, Hz, 1F, F') ppm.

### 6.4.5 Synthesis of ( $\pm$ )-4,4-difluoropentan-2-ol ( $\pm$ )-E

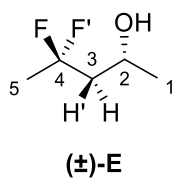

To a solution of benzyl ether ( $\pm$ )-SI-12 (790 mg, 3.69 mmol, 1 equiv) in CH<sub>2</sub>Cl<sub>2</sub>/H<sub>2</sub>O (9:1, 50 mL) was added DDQ (1.67 g, 7.37 mmol, 2 equiv). The resulting mixture was refluxed for 14 h then diluted with CH<sub>2</sub>Cl<sub>2</sub> (110 mL), washed successively with sat. aq. NaHCO<sub>3</sub> (80 mL) and brine (40 mL), dried (MgSO<sub>4</sub>), filtered and evaporated carefully. The product was purified by column chromatography on silica gel eluting with pentane/Et<sub>2</sub>O (80:20 to 70:30) then distilled (kugelrohr) to give 79 mg (0.64 mmol, 17%) of pure ( $\pm$ )-E as a colorless oil.



$R_f$  0.37 (pentane/Et<sub>2</sub>O 70:30).

**Bp** 150–160 °C

**IR** (neat) 3376 (br, w), 2974 (w), 2932 (w), 1392 (m), 1233 (m), 1142 (s), 919 (s).

**<sup>1</sup>H NMR** (500 MHz, CDCl<sub>3</sub>, 25 °C) δ 4.22 (dqdd, <sup>3</sup>J<sub>H<sub>2</sub>-H<sub>3</sub></sub> = 8.6, <sup>3</sup>J<sub>H<sub>2</sub>-H<sub>1</sub></sub> = 6.3, <sup>3</sup>J<sub>H<sub>2</sub>-OH</sub> = 3.5, <sup>3</sup>J<sub>H<sub>2</sub>-H<sub>3</sub>'</sub> = 3.0 Hz, 1H, H-2), 2.07 (dddd, <sup>3</sup>J<sub>H<sub>3</sub>-F</sub> = 19.3, <sup>2</sup>J<sub>H<sub>3</sub>-H<sub>3</sub>'</sub> = 15.0, <sup>3</sup>J<sub>H<sub>3</sub>-F'</sub> = 13.3, <sup>3</sup>J<sub>H<sub>3</sub>-H<sub>2</sub></sub> = 8.6 Hz, 1H, H-3), 1.99 (dddd, <sup>3</sup>J<sub>H<sub>3</sub>'-F</sub> = 20.0, <sup>2</sup>J<sub>H<sub>3</sub>'-H<sub>3</sub></sub> = 15.0, <sup>3</sup>J<sub>H<sub>3</sub>'-F</sub> = 13.7, <sup>3</sup>J<sub>H<sub>3</sub>'-H<sub>2</sub></sub> = 3.0 Hz, 1H, H-3'), 1.84 (ddd, appears as td, <sup>3</sup>J<sub>OH-H<sub>2</sub></sub> = 3.5, <sup>1</sup>J<sub>OH...F'</sub> = 3.5, <sup>1</sup>J<sub>OH...F</sub> = 1.4 Hz, 1H, OH), 1.68 (t, <sup>3</sup>J<sub>H<sub>5</sub>-F/F'</sub> = 18.9 Hz, 3H, H-5), 1.27 (d, <sup>3</sup>J<sub>H<sub>1</sub>-H<sub>2</sub></sub> = 6.3 Hz, 3H, H-1) ppm.

**<sup>1</sup>H{<sup>19</sup>F} NMR** (500 MHz, CDCl<sub>3</sub>, 25 °C) δ 4.22 (dqdd, <sup>3</sup>J<sub>H<sub>2</sub>-H<sub>3</sub></sub> = 8.6, <sup>3</sup>J<sub>H<sub>2</sub>-H<sub>1</sub></sub> = 6.3, <sup>3</sup>J<sub>H<sub>2</sub>-OH</sub> = 3.5, <sup>3</sup>J<sub>H<sub>2</sub>-H<sub>3</sub>'</sub> = 3.0 Hz, 1H, H-2), 2.07 (dddd, <sup>2</sup>J<sub>H<sub>3</sub>-H<sub>3</sub>'</sub> = 15.0, <sup>3</sup>J<sub>H<sub>3</sub>-H<sub>2</sub></sub> = 8.6 Hz, 1H, H-3), 1.99 (dddd, <sup>2</sup>J<sub>H<sub>3</sub>'-H<sub>3</sub></sub> = 15.0, <sup>3</sup>J<sub>H<sub>3</sub>'-H<sub>2</sub></sub> = 3.0 Hz, 1H, H-3'), 1.84 (d, <sup>3</sup>J<sub>OH-H<sub>2</sub></sub> = 3.5 Hz, 1H, OH), 1.68 (s, 3H, H-5), 1.27 (d, <sup>3</sup>J<sub>H<sub>1</sub>-H<sub>2</sub></sub> = 6.3 Hz, 3H, H-1) ppm.

**<sup>13</sup>C NMR** (101 MHz, CDCl<sub>3</sub>, 25 °C) δ 124.2 (t, <sup>1</sup>J<sub>C<sub>4</sub>-F/F'</sub> = 237.7 Hz, C-4), 63.3 (t, <sup>3</sup>J<sub>C<sub>2</sub>-F/F'</sub> = 4.4 Hz, C-2), 46.4 (t, <sup>2</sup>J<sub>C<sub>3</sub>-F/F'</sub> = 23.5 Hz, C-3), 24.1 (t, <sup>2</sup>J<sub>C<sub>1</sub>-F/F'</sub> = 27.5 Hz, C-5), 23.9 (C-1) ppm.

**<sup>19</sup>F NMR** (471 MHz, CDCl<sub>3</sub>, 25 °C) δ -88.2 (ddqdd, appears as dqind, <sup>2</sup>J<sub>F-F'</sub> = 242.5, <sup>3</sup>J<sub>F-H<sub>3</sub></sub> = 19.3, <sup>3</sup>J<sub>F-H<sub>5</sub></sub> = 18.9, <sup>3</sup>J<sub>F-H<sub>3</sub>'</sub> = 13.8 Hz, 1F, F (<sup>1</sup>J<sub>F...HO</sub> = 1.5 Hz not resolved)), -89.7 (ddqdd, <sup>2</sup>J<sub>F-F'</sub> = 242.5, <sup>3</sup>J<sub>F'-H<sub>3</sub>'</sub> = 20.0, <sup>3</sup>J<sub>F'-H<sub>5</sub></sub> = 18.9, <sup>3</sup>J<sub>F'-H<sub>3</sub></sub> = 13.2, <sup>1</sup>J<sub>F'...HO</sub> = 3.5 Hz, 1F, F') ppm.

**<sup>19</sup>F{<sup>1</sup>H} NMR** (471 MHz, CDCl<sub>3</sub>, 25 °C) δ -88.2 (d, <sup>2</sup>J<sub>F-F'</sub> = 242.5 Hz, 1F, F), -89.7 (d, <sup>2</sup>J<sub>F-F'</sub> = 242.5 Hz, 1F, F') ppm.

**<sup>1</sup>H NMR** (500 MHz, CDCl<sub>3</sub>, -50 °C) δ 4.26 (dqdd, <sup>3</sup>J<sub>H<sub>2</sub>-H<sub>3</sub></sub> = 9.2, <sup>3</sup>J<sub>H<sub>2</sub>-H<sub>1</sub></sub> = 6.3, <sup>3</sup>J<sub>H<sub>2</sub>-OH</sub> = 2.8, <sup>3</sup>J<sub>H<sub>2</sub>-H<sub>3</sub>'</sub> = 2.4 Hz, 1H, H-2), 2.16 (m, upon homodecoupling of H-2 simplifies as dd, <sup>1</sup>J<sub>OH...F'</sub> = 4.7, <sup>1</sup>J<sub>OH...F</sub> = 1.7 Hz, upon <sup>19</sup>F decoupling simplifies as d, <sup>3</sup>J<sub>OH-H<sub>2</sub></sub> = 2.8 Hz, 1H, OH), 2.07 (dddd, <sup>3</sup>J<sub>H<sub>3</sub>-F</sub> = 21.1, <sup>2</sup>J<sub>H<sub>3</sub>-H<sub>3</sub>'</sub> = 15.0, <sup>3</sup>J<sub>H<sub>3</sub>-F'</sub> = 11.6, <sup>3</sup>J<sub>H<sub>3</sub>-H<sub>2</sub></sub> = 9.2 Hz, 1H, H-3), 1.99 (dddd, <sup>3</sup>J<sub>H<sub>3</sub>'-F</sub> = 21.7, <sup>2</sup>J<sub>H<sub>3</sub>'-H<sub>3</sub></sub> = 15.0, <sup>3</sup>J<sub>H<sub>3</sub>'-F</sub> = 13.7, <sup>3</sup>J<sub>H<sub>3</sub>'-H<sub>2</sub></sub> = 2.4 Hz, 1H, H-3'), 1.68 (t, <sup>3</sup>J<sub>H<sub>5</sub>-F/F'</sub> = 19.2 Hz, 3H, H-5), 1.25 (d, <sup>3</sup>J<sub>H<sub>1</sub>-H<sub>2</sub></sub> = 6.3 Hz, 3H, H-1) ppm.

**<sup>1</sup>H{<sup>19</sup>F} NMR** (500 MHz, CDCl<sub>3</sub>, -50 °C) δ 4.26 (dqdd, <sup>3</sup>J<sub>H<sub>2</sub>-H<sub>3</sub></sub> = 9.2, <sup>3</sup>J<sub>H<sub>2</sub>-H<sub>1</sub></sub> = 6.4, <sup>3</sup>J<sub>H<sub>2</sub>-OH</sub> = 2.8, <sup>3</sup>J<sub>H<sub>2</sub>-H<sub>3</sub>'</sub> = 2.4 Hz, 1H, H-2), 2.15 (d, <sup>3</sup>J<sub>OH-H<sub>2</sub></sub> = 2.8 Hz, 1H, OH), 2.07 (dd, <sup>2</sup>J<sub>H<sub>3</sub>-H<sub>3</sub>'</sub> = 15.1, <sup>3</sup>J<sub>H<sub>3</sub>-H<sub>2</sub></sub> = 9.2 Hz, 1H, H-3), 1.99 (dd, <sup>2</sup>J<sub>H<sub>3</sub>'-H<sub>3</sub></sub> = 15.1, <sup>3</sup>J<sub>H<sub>3</sub>'-H<sub>2</sub></sub> = 2.4 Hz, 1H, H-3'), 1.68 (s, 3H, H-5), 1.25 (d, <sup>3</sup>J<sub>H<sub>1</sub>-H<sub>2</sub></sub> = 6.4 Hz, 3H, H-1) ppm.

**<sup>19</sup>F NMR** (471 MHz, CDCl<sub>3</sub>, -50 °C) δ -89.4 (m, 1F, F), -90.3 (ddqdd, <sup>2</sup>J<sub>F-F'</sub> = 239.6, <sup>3</sup>J<sub>F'-H<sub>3</sub>'</sub> = 21.7, <sup>3</sup>J<sub>F'-H<sub>5</sub></sub> = 19.2, <sup>3</sup>J<sub>F'-H<sub>3</sub></sub> = 11.6, <sup>1</sup>J<sub>F'...HO</sub> = 4.7 Hz, 1F, F') ppm.

**<sup>19</sup>F{<sup>1</sup>H} NMR** (471 MHz, CDCl<sub>3</sub>, -50 °C) δ -89.5 (d, <sup>2</sup>J<sub>F-F'</sub> = 239.6 Hz, 1F, F), -90.3 (d, <sup>2</sup>J<sub>F-F'</sub> = 239.6 Hz, 1F, F') ppm.

## 6.5 Synthesis of (±)-4,4-difluorobutan-2-ol (±)-F

### 6.5.1 Synthesis of (±)-(2S,4R)-2,4-dimethyl-1,3-dioxane (±)-SI-13

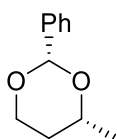

(±)-SI-13

A mixture of 1,3-butanediol (10 g, 111 mmol), benzaldehyde (13.5 mL, 133 mmol, 1.2 equiv), *p*-toluenesulfonic acid monohydrate (2.11 g, 11 mmol, 0.1 equiv) and MgSO<sub>4</sub> (26.7 g, 222 mmol, 2 equiv) in 100 mL of CH<sub>2</sub>Cl<sub>2</sub> was stirred for 5 hours at room temperature after which the reaction mixture was filtered. The organic layer was washed with a sat. aq. NaHCO<sub>3</sub> followed by sat. aq. Na<sub>2</sub>S<sub>2</sub>O<sub>3</sub>. The organic layer was dried over MgSO<sub>4</sub>, filtered and evaporated to give 20.5 g (colorless oil) of a mixture consisting of the desired benzylidene acetal (±)-SI-13 and benzaldehyde (<sup>1</sup>H NMR ratio: 92/8) which was used without further purification. The NMR data matched with the literature.<sup>8</sup>

### 6.5.2 Synthesis of (±)-3-benzyloxy-butan-1-ol (±)-SI-14

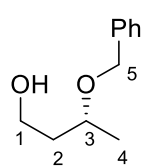

(±)-SI-14

To the mixture of benzylidene acetal (±)-SI-13 obtained above (8.47 g, 47.5 mmol) in 42 mL of freshly distilled toluene at 0 °C was added DIBAL (1.0 M in hexane, 57 mL, 57 mmol, 1.2 equiv) using a dropping funnel over a period of 30 minutes. After stirring for 5 hours at 0 °C, the reaction mixture was stirred overnight at room temperature then quenched by adding MeOH and NaOH (10% aq., 200 mL). The resulting solution was extracted three times with Et<sub>2</sub>O. The combined organic layers were dried over MgSO<sub>4</sub>, filtered and evaporated. The crude mixture was purified by flash chromatography (petroleum ether 40-60 °C/EtOAc, 90:10 to 70:30) afforded 7.03 g (39.0 mmol, 85% over two steps) (±)-SI-14 as a colorless oil.

<sup>1</sup>H NMR (400 MHz, CDCl<sub>3</sub>, 25 °C) δ 7.40–7.27 (m, 5H, H<sub>Ar</sub>), 4.65 (d, <sup>2</sup>J<sub>H5-H5'</sub> = 11.6 Hz, 1H, H-5), 4.45 (d, <sup>2</sup>J<sub>H5'-H5</sub> = 11.6 Hz, 1H, H-5'), 3.79 (m, 3H, H-1 + H-3), 2.47 (dd, <sup>3</sup>J<sub>OH-H1</sub> = 6.4 Hz, <sup>3</sup>J<sub>OH-H1'</sub> = 4.5 Hz, 1H, OH), 1.79 (m, 2H, H-2), 1.27 (d, <sup>3</sup>J<sub>H4-H3</sub> = 6.2 Hz, 3H, H-4) ppm. <sup>13</sup>C NMR (101 MHz, CDCl<sub>3</sub>, 25 °C) δ 138.4 (C<sub>q,Ar</sub>), 128.5 (2 × CH<sub>Ar</sub>), 127.7 (2 × CH<sub>Ar</sub>), 74.7 (C-3), 70.5 (CH<sub>2</sub>, C-5), 60.9 (C-1), 38.8 (C-2), 19.4 (C-4) ppm. The NMR data matched with the literature.<sup>9</sup>

### 6.5.3 Synthesis of (±)-3-benzyloxy-butanal (±)-SI-15

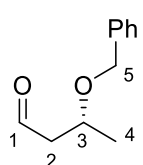

(±)-SI-15

To a solution of the alcohol (±)-SI-14 (6.86 g, 38.2 mmol, 1 equiv) in CH<sub>2</sub>Cl<sub>2</sub> (40 mL) were added TEMPO (604 mg, 3.87 mmol, 0.1 equiv) and (diacetoxyiodo)benzene (13.7 g, 42.5 mmol, 1.1 equiv). The reaction mixture was stirred at room temperature for 1.5 h and was then quenched with sat. aq. Na<sub>2</sub>S<sub>2</sub>O<sub>3</sub>. The layers were separated and the aqueous layer was extracted with CH<sub>2</sub>Cl<sub>2</sub>. The combined organic phases were dried over MgSO<sub>4</sub>, filtered and evaporated. The crude mixture was purified by flash chromatography (petroleum ether 40-60 °C/Et<sub>2</sub>O, 90:10 to 85:15) which afforded 6.40 g (35.9 mmol, 94%) of (±)-SI-15 as a colorless oil.

IR (neat) 2972 (m), 2929 (m), 2866 (m), 2835 (m), 2722 (m), 1723 (s). <sup>1</sup>H NMR (400 MHz, CDCl<sub>3</sub>, 25 °C) δ 9.81 (app. t, <sup>3</sup>J<sub>H1-H2</sub> = 2.0 Hz, 1H, H-1), 7.39–7.28 (m, 5H, H<sub>Ar</sub>), 4.62 (d, <sup>2</sup>J<sub>H5-H5'</sub> = 11.6 Hz, 1H, H-5), 4.49 (d, <sup>2</sup>J<sub>H5'-H5</sub> = 11.6 Hz, 1H, H-5'), 4.10 (dq, <sup>3</sup>J<sub>H3-H2</sub> = 7.4 Hz, <sup>3</sup>J<sub>H3-H4</sub> = 6.2 Hz, <sup>3</sup>J<sub>H3-H2'</sub> = 5.0 Hz, 1H, H-3), 2.72 (ddd, <sup>2</sup>J<sub>H2-H2'</sub> = 16.4 Hz, <sup>3</sup>J<sub>H2-H3</sub> = 7.4 Hz, <sup>3</sup>J<sub>H2-H1</sub> = 2.5 Hz, 1H, H-2), 2.54 (ddd, <sup>2</sup>J<sub>H2'-H2</sub> = 16.4 Hz, <sup>3</sup>J<sub>H2'-H3</sub> = 5.0 Hz, <sup>3</sup>J<sub>H2'-H1</sub> = 1.8 Hz, 1H, H-2'), 1.31 (d, <sup>3</sup>J<sub>H4-H3</sub> = 6.2 Hz, 3H, H-4) ppm. <sup>13</sup>C NMR (101 MHz, CDCl<sub>3</sub>, 25 °C) δ 201.4 (C-1), 138.2 (C<sub>q,Ar</sub>), 128.4 (2 × CH<sub>Ar</sub>), 127.7 (CH<sub>Ar</sub>), 127.6 (2 × CH<sub>Ar</sub>), 70.6 (C-5), 70.2 (C-3), 50.5 (C-2), 19.8 (C-4) ppm. HRMS (MS+) for C<sub>11</sub>H<sub>14</sub>O<sub>2</sub> calcd 178.0988, found 178.0986. The <sup>1</sup>H NMR data matched with the literature.<sup>10</sup>

### 6.5.4 Synthesis of (±)-2-benzyloxy-4,4-difluorobutane (±)-SI-16

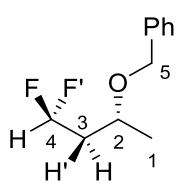

(±)-SI-16

To a solution of the aldehyde (±)-SI-15 (5.00 g, 28.4 mmol, 1 equiv) dissolved in 100 mL of dry CH<sub>2</sub>Cl<sub>2</sub> was added diethylaminosulfur trifluoride (7.50 mL, 56.7 mmol, 2 equiv). The mixture was stirred at room temperature for 45 min and was then poured in a saturated aqueous solution of Na<sub>2</sub>CO<sub>3</sub>. The layers were separated and the aqueous layer was extracted three times with CH<sub>2</sub>Cl<sub>2</sub>. The combined organic phases were dried over MgSO<sub>4</sub>, filtered and evaporated. The crude mixture was purified by flash chromatography (petroleum ether 40-60 °C/Et<sub>2</sub>O 99:1) which afforded 5.21 g (26.0 mmol, 93%) of (±)-SI-16 as a colorless oil.

IR (neat) 3032 (w), 2976 (w), 2935 (w), 2359 (w). <sup>1</sup>H NMR (400 MHz, CDCl<sub>3</sub>, 25 °C) δ 7.40–7.28 (m, 5H, H<sub>Ar</sub>), 6.00 (tdd, <sup>2</sup>J<sub>H4-F</sub> = 57.0 Hz, <sup>3</sup>J<sub>H4-H3</sub> = 6.6 Hz, <sup>3</sup>J<sub>H4-H3'</sub> = 3.1 Hz, 1H, H-4), 4.62 (d, <sup>2</sup>J<sub>H5-H5'</sub> = 11.5 Hz, 1H, H-5), 4.43 (d, <sup>2</sup>J<sub>H5'-H5</sub> = 11.5 Hz, 1H, H-5'), 3.79 (m, 1H, H-2), 2.21–1.90 (m, 2H, H-3 + H-3'), 1.28 (d, <sup>3</sup>J<sub>H1-H2</sub> = 6.2 Hz, 3H, H-1) ppm. <sup>13</sup>C NMR (101 MHz, CDCl<sub>3</sub>, 25 °C) δ: 138.2 (C<sub>q,Ar</sub>), 128.4 (2 × CH<sub>Ar</sub>), 127.7 (CH<sub>Ar</sub>), 127.6 (2 × CH<sub>Ar</sub>), 116.0 (t, <sup>1</sup>J<sub>C4-F</sub> = 238 Hz, C-4), 70.6 (C-5), 70.1 (dd, <sup>3</sup>J<sub>C2-F</sub> = 9 Hz, <sup>3</sup>J<sub>C2-F'</sub> = 4 Hz, C-2), 41.6 (t, <sup>2</sup>J<sub>C3-F</sub> = 21 Hz,

C-3), 19.7 (C-1) ppm.  $^{19}\text{F}$  NMR (376 MHz,  $\text{CDCl}_3$ , 25 °C)  $\delta$  -116.7 (dddd appears as ddt,  $^2J_{\text{F-F}'} = 284.4$  Hz,  $^2J_{\text{F-H4}} = 55.5$  Hz,  $^4J_{\text{F-H3}} = 10.4$  Hz, 1F, F), -117.88 (dddd,  $^2J_{\text{F-F}'} = 284.4$  Hz,  $^2J_{\text{F-H4}} = 57.2$  Hz,  $^4J_{\text{F-H3}} = 26.0$  Hz,  $^4J_{\text{F-H3}'} = 13.9$  Hz, 1F, F'). HRMS (MS+) for  $\text{C}_{11}\text{H}_{14}\text{F}_2\text{O}$  calcd 200.0994, found 200.0998.

### 6.5.5 Synthesis of ( $\pm$ )-4,4-difluorobutan-2-ol ( $\pm$ )-F

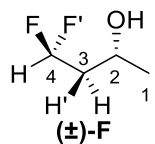

To a mixture of the benzylated compound ( $\pm$ )-**SI-16** (15.0mmol, 3.01g) in 180mL of dichloromethane and 18mL of water was added 2,3-Dichloro-5,6-dicyano-*p*-benzoquinone (30mmol, 6.81g). The mixture was heated at reflux and stirred for 24h and was then poured into a saturated aqueous solution of  $\text{NaHCO}_3$  (1L). The aqueous layer was extracted with dichloromethane several times until the product is no longer detectable on TLC from the organic layer.

IR : 3356.4 (br), 2976.7 (m), 2933.5 (m), 1401.5 (m), 1378.3 (m), 1104.5 (s).

$^1\text{H}$  NMR (500 MHz,  $\text{CDCl}_3$ , 25 °C)  $\delta$  6.01 (tdd,  $^2J_{\text{H4-F}} = 56.8$  Hz,  $^3J_{\text{H4-H3}'} = 5.5$  Hz,  $^3J_{\text{H4-H3}} = 3.6$  Hz, 1H, H-4), 4.12 (dqdd,  $^3J_{\text{H2-H3}} = 8.4$  Hz,  $^3J_{\text{H2-H1}} = 6.3$  Hz,  $^3J_{\text{H2-OH}} = 4.5$  Hz,  $^3J_{\text{H2-H3}'} = 4.4$  Hz, 1H, H-2), 2.08 – 1.95 (dddd appears as dtdd,  $^3J_{\text{H3-F}'} = 20.9$  Hz,  $^3J_{\text{H3-H3}'} = 14.5$  Hz,  $^3J_{\text{H3-F}} = 14.5$  Hz,  $^3J_{\text{H3-H2}} = 8.4$  Hz,  $^3J_{\text{H3-H4}} = 3.6$  Hz, 1H, H-3), 1.97 (dddddd appears as dtddd,  $^3J_{\text{H3-F}'} = 16.3$  Hz,  $^3J_{\text{H3-F}} = 14.5$  Hz,  $^2J_{\text{H3-H3}} = 14.5$  Hz,  $^3J_{\text{H3-H4}} = 5.5$  Hz,  $^3J_{\text{H3-H2}} = 4.4$  Hz,  $^4J_{\text{H3-OH}} = 0.5$  Hz, 1H, H-3'), 1.52 (1H, dddd appears as dq,  $^3J_{\text{OH-H2}} = 4.5$  Hz,  $^4J_{\text{OH-H3}'} = 0.6$  Hz,  $^1J_{\text{OH-F}} = 0.6$  Hz,  $^1J_{\text{OH-F}} = 0.6$  Hz, OH), 1.39 (dt,  $^3J_{\text{H1-H2}} = 6.2$  Hz,  $^5J_{\text{H1-F}} = 0.6$  Hz, 3H, H-1) ppm.

$^1\text{H}\{^{19}\text{F}\}$  NMR (500 MHz,  $\text{CDCl}_3$ , 25 °C)  $\delta$  6.01 (dd,  $^3J_{\text{H4-H3}'} = 5.5$  Hz,  $^3J_{\text{H4-H3}} = 3.7$  Hz, 1H, H-4), 4.12 (dqdd,  $^3J_{\text{H2-H3}} = 8.4$  Hz,  $^3J_{\text{H2-H1}} = 6.3$  Hz,  $^3J_{\text{H2-OH}} = 4.5$  Hz,  $^3J_{\text{H2-H3}'} = 4.4$  Hz, 1H, H-2), 2.01 (ddd,  $^3J_{\text{H3-H3}'} = 14.5$  Hz,  $^3J_{\text{H3-H2}} = 8.3$  Hz,  $^3J_{\text{H3-H4}} = 3.6$  Hz, 1H, H-3), 1.97 (dddd,  $^2J_{\text{H3-H3}} = 14.5$  Hz,  $^3J_{\text{H3-H4}} = 5.6$  Hz,  $^3J_{\text{H3-H2}} = 4.4$  Hz,  $^4J_{\text{H3-OH}} = 0.5$  Hz, 1H, H-3'), 1.52 (dd,  $^3J_{\text{OH-H2}} = 4.5$  Hz,  $^4J_{\text{OH-H3}'} = 0.5$  Hz, 1H, OH), 1.29 (d,  $^3J_{\text{H1-H2}} = 6.3$  Hz, 3H, H-1) ppm.

$^{13}\text{C}$  NMR (101 MHz,  $\text{CDCl}_3$ , 25 °C)  $\delta$  116.3 (t,  $^1J_{\text{C4-F}} = 238$  Hz, C-4), 63.2 (dd,  $^3J_{\text{C2-F}} = 7, 5$  Hz, C-2), 42.9 (t,  $^2J_{\text{C3-F}} = 20$  Hz, C-3), 24.0 (C-1) ppm.

$^{19}\text{F}$  NMR (471 MHz,  $\text{CDCl}_3$ , 25 °C)  $\delta$  -116.4 (ddtm,  $^2J_{\text{F-F}'} = 286.1$  Hz,  $^2J_{\text{F-H4}} = 56.7$  Hz,  $^3J_{\text{F-H3}'} = ^3J_{\text{F-H3}} = 14.7$  Hz ( $^1J_{\text{F-HO}}$  and  $^5J_{\text{F-H1}}$  not resolved), 1F, F), -117.5 (ddddm,  $^2J_{\text{F-F}'} = 286.1$  Hz,  $^2J_{\text{F-H4}} = 57.0$  Hz,  $^3J_{\text{F-H3}} = 21.1$  Hz,  $^3J_{\text{F-H3}'} = 16.4$  Hz, ( $^1J_{\text{F-HO}}$  and  $^5J_{\text{F-H1}}$  not resolved), 1F, F') ppm.

$^{19}\text{F}\{^1\text{H}\}$  NMR (471 MHz,  $\text{CDCl}_3$ , 25 °C)  $\delta$  -116.4 (d,  $^2J_{\text{F-F}'} = 286.1$  Hz, 1F, F), -117.1 (d,  $^2J_{\text{F-F}'} = 286.1$  Hz, 1F, F') ppm.

HRMS (MS+) for  $\text{C}_4\text{H}_8\text{F}_2\text{O}$  calcd 110.0538, found 110.0509.

## 6.6 Synthesis of 3,3-difluoropropan-1-ol G

### 6.6.1 Synthesis of 1-benzyloxy-3,3-difluoropropane SI-17

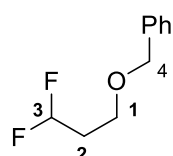

SI-17

To a round-bottom flask were added 3-benzyloxypropanal (1.00 g, 6.09 mmol, 1.0 equiv),  $\text{CH}_2\text{Cl}_2$  (20 mL) and diethylaminosulfur trifluoride (1.61 mL, 12.2 mmol, 2.0 equiv). The resulting solution was stirred at room temperature overnight. The reaction mixture was quenched with sat. aq.  $\text{NaHCO}_3$  solution (40 mL) and extracted with  $\text{CH}_2\text{Cl}_2$  (3  $\times$  60 mL). The combined organic layers were washed with brine (100 mL), dried over  $\text{MgSO}_4$ , filtered and concentrated. The crude was purified by flash chromatography (pentane/ $\text{Et}_2\text{O}$  97:3 to 90:10) to afford 1.02 g (5.48 mmol, 90%) of **SI-17** as a colorless oil.

IR (neat) 3087 (w), 3059 (w), 3028 (w), 2970 (w), 2939 (w), 2866 (w), 2798 (w), 1492 (w), 1454 (m), 1395 (m), 1364 (m), 1095 (s), 1023 (s), 975 (s), 906 (m), 733 (s)  $\text{cm}^{-1}$ .  $^1\text{H}$  NMR (400 MHz,  $\text{CDCl}_3$ , 25 °C)  $\delta$  7.42–7.28 (m,

5H, H<sub>Ar</sub>), 6.02 (tt, <sup>2</sup>J<sub>H3-F</sub> = 56.9 Hz, <sup>3</sup>J<sub>H3-H2</sub> = 4.8 Hz, 1H, H-3), 4.53 (s, 2H, H-4), 3.64 (t, <sup>3</sup>J<sub>H1-H2</sub> = 6.1 Hz, 2H, H-1), 2.15 (ttd, <sup>3</sup>J<sub>H2-F</sub> = 16.7 Hz, <sup>3</sup>J<sub>H2-H1</sub> = 6.1 Hz, <sup>3</sup>J<sub>H2-H3</sub> = 4.9 Hz, 2H, H-2) ppm. <sup>13</sup>C NMR (101 MHz, CDCl<sub>3</sub>, 25 °C) δ 137.8 (C<sub>q,Ar</sub>), 128.4 (2 × CH<sub>Ar</sub>), 127.8 (CH<sub>Ar</sub>), 127.6 (2 × CH<sub>Ar</sub>), 115.9 (t, <sup>1</sup>J<sub>C3-F</sub> = 237.7 Hz, C-3), 73.2 (C-4), 64.0 (t, <sup>3</sup>J<sub>C1-F</sub> = 6.9 Hz, C-1), 34.8 (t, <sup>2</sup>J<sub>C2-F</sub> = 21.8 Hz, C-2) ppm. <sup>19</sup>F NMR (376 MHz, CDCl<sub>3</sub>, 25 °C) δ -117.8 (dt, <sup>2</sup>J<sub>F-H3</sub> = 57.2 Hz, <sup>3</sup>J<sub>F-H2</sub> = 16.5 Hz, 2F) ppm. MS (EI) *m/z* 186.2 (M<sup>+</sup>, 8%). HRMS (MS+) for C<sub>10</sub>H<sub>12</sub>F<sub>2</sub>O calcd 186.0851, found 186.0848.

### 6.6.2 Synthesis of 3,3-difluoropropan-1-ol **G**

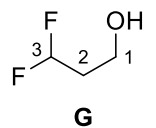

To a round-bottom flask were added **SI-17** (360 mg, 1.93 mmol, 1 equiv), CH<sub>2</sub>Cl<sub>2</sub> (22.5 mL), water (2.50 mL) and 2,3-dichloro-5,6-dicyano-*p*-benzoquinone (1.74 g, 7.72 mmol, 4 equiv). The resulting mixture was refluxed overnight. After completion was reached, indicated by TLC analysis, the reaction mixture was directly purified by flash chromatography (pentane/Et<sub>2</sub>O, 70:30) followed by a second column chromatography (CH<sub>2</sub>Cl<sub>2</sub>, 100%) to afford 30 mg (0.31 mmol, 16%) of **G** as a colorless oil.

IR (neat) 3350 (br, w), 2958 (w), 2913 (m), 2852 (w), 1430 (w), 1401 (w), 1381 (w), 1119 (s), 1070 (s), 1054 (s), 964 (s), 805 (w) cm<sup>-1</sup>;

<sup>1</sup>H NMR (500 MHz, CDCl<sub>3</sub>, 25 °C) δ 6.03 (tt, <sup>2</sup>J<sub>H3-F</sub> = 57.0 Hz, <sup>3</sup>J<sub>H3-H2</sub> = 4.6 Hz, 1H, H-3), 3.87 (td, <sup>3</sup>J<sub>H1-H2</sub> = 6.0 Hz, <sup>3</sup>J<sub>H1-OH</sub> = 5.1 Hz, 2H, H-1), 2.12 (ttd, <sup>3</sup>J<sub>H2-F</sub> = 17.0 Hz, <sup>3</sup>J<sub>H2-H1</sub> = 6.0 Hz, <sup>3</sup>J<sub>H2-H3</sub> = 4.6 Hz, 2H, H-2), 1.45 (1H, tt, <sup>3</sup>J<sub>OH-H1</sub> = 5.1, <sup>1</sup>J<sub>OH...F</sub> = 0.4 Hz, OH) ppm.

<sup>1</sup>H{<sup>19</sup>F} NMR (500 MHz, CDCl<sub>3</sub>, 25 °C) δ 6.03 (t, <sup>3</sup>J<sub>H3-H2</sub> = 4.6 Hz, 1H, H-3), 3.87 (td, <sup>3</sup>J<sub>H1-H2</sub> = 5.9 Hz, <sup>3</sup>J<sub>H1-OH</sub> = 5.2 Hz, 2H, H-1), 2.12 (td, <sup>3</sup>J<sub>H2-H1</sub> = 6.0 Hz, <sup>3</sup>J<sub>H2-H3</sub> = 4.6 Hz, 2H, H-2), 1.45 (t, <sup>3</sup>J<sub>OH-H1</sub> = 5.1 Hz, 1H, OH) ppm.

<sup>13</sup>C NMR (126 MHz, CDCl<sub>3</sub>, 25 °C) δ 116.1 (t, <sup>1</sup>J<sub>C3-F</sub> = 239.4 Hz, C-3), 56.8 (t, <sup>3</sup>J<sub>C1-F</sub> = 6.8 Hz, C-1), 36.9 (t, <sup>2</sup>J<sub>C2-F</sub> = 20.3 Hz, C-2) ppm.

<sup>19</sup>F NMR (376 MHz, CDCl<sub>3</sub>, 25 °C) δ -117.8 (dt, <sup>2</sup>J<sub>F-H3</sub> = 56.8 Hz, <sup>3</sup>J<sub>F-H2</sub> = 16.9 Hz, 2F) ppm (<sup>1</sup>H<sub>F...HO</sub> not resolved).

<sup>19</sup>F{<sup>1</sup>H} NMR (376 MHz, CDCl<sub>3</sub>, 25 °C) δ -117.6 (s, 2F) ppm.

HRMS (MS+) for C<sub>3</sub>H<sub>6</sub>F<sub>2</sub>O calcd 96.0381, found 96.0381.

1. Caron, G.; Kazlauskas, R. J., *Tetrahedron: Asymmetry* **1994**, *5* (4), 657-664.
2. Ikeda, H.; Sato, E.; Sugai, T.; Ohta, H., *Tetrahedron* **1996**, *52* (24), 8113-8122.
3. Yoneda, A.; Fukuhara, T.; Hara, S., *Chem. Commun. (Cambridge, U. K.)* **2005**, (28), 3589-3590.
4. Ashley, G. W.; Burlingame, M.; Desai, R.; Fu, H.; Leaf, T.; Licari, P. J.; Tran, C.; Abbanat, D.; Bush, K.; Macielag, M., *J. Antibiot.* **2006**, *59* (7), 392-401.
5. Denmark, S. E.; Almstead, N. G., *J. Am. Chem. Soc.* **1991**, *113* (21), 8089-8110.
6. Hoffmann, R. W.; Stenkamp, D.; Trieselmann, T.; Göttlich, R., *Eur. J. Org. Chem.* **1999**, *1999* (11), 2915-2927.
7. Zou, H.; Zhou, L.; Li, Y.; Cui, Y.; Zhong, H.; Pan, Z.; Yang, Z.; Quan, J., *J. Med. Chem.* **2010**, *53* (3), 994-1003.
8. Soderquist, J. A.; Kock, I.; Estrella, M. E., *Org. Process Res. Dev.* **2006**, *10* (5), 1076-1079.
9. Shie, C.-R.; Tzeng, Z.-H.; Kulkarni, S. S.; Uang, B.-J.; Hsu, C.-Y.; Hung, S.-C., *Angew. Chem., Int. Ed.* **2005**, *44* (11), 1665-1668.
10. Bianchi, O.; Cesti, P.; Golini, P., *Tetrahedron* **1989**, *45* (3), 869-876.

---

# SUPPORTING INFORMATION 4

## COPIES OF SPECTRA (INTERMEDIATES)

## COPIES OF $^{13}\text{C}$ OF NOVEL FLUOROHYDRINS

---

|         |                                                                                                                                                                                        |     |
|---------|----------------------------------------------------------------------------------------------------------------------------------------------------------------------------------------|-----|
| 7       | Copies of all spectra .....                                                                                                                                                            | 107 |
| 7.1     | Synthesis of ( $\pm$ )- <i>syn</i> and ( $\pm$ )- <i>anti</i> -4-fluoropentan-2-ol (( $\pm$ )- <i>syn</i> -A and ( $\pm$ )- <i>anti</i> -A) .....                                      | 107 |
| 7.1.1   | Isolation of <i>meso</i> -2,4-pentanediol ( <i>meso</i> -SI-1) and ( $\pm$ )-2,4-pentanediol (( $\pm$ )-SI-2) from a commercial mixture of <i>meso</i> and <i>racemic</i> isomers..... | 107 |
| 7.1.1.1 | <i>meso</i> -2,4-Pentanediol ( <i>meso</i> -SI-1).....                                                                                                                                 | 107 |
| 7.1.1.2 | ( $\pm$ )-2,4-Pentanediol (( $\pm$ )-SI-2).....                                                                                                                                        | 109 |
| 7.1.2   | ( $\pm$ )- <i>anti</i> and ( $\pm$ )- <i>syn</i> -2-(3'-Methylbenzoyloxy)-4-fluoropentane ( $\pm$ )- <i>anti</i> -SI-3 and ( $\pm$ )- <i>syn</i> -SI-4 .....                           | 111 |
| 7.1.2.1 | ( $\pm$ )- <i>anti</i> -2-(3'-Methylbenzoyloxy)-4-fluoropentane ( $\pm$ )- <i>anti</i> -SI-3.....                                                                                      | 111 |
| 7.1.2.2 | ( $\pm$ )- <i>syn</i> -2-(3'-Methylbenzoyloxy)-4-fluoropentane ( $\pm$ )- <i>syn</i> -SI-4 .....                                                                                       | 114 |
| 7.1.3   | Fluorohydrins ( $\pm$ )- <i>anti</i> -A and ( $\pm$ )- <i>syn</i> -A .....                                                                                                             | 117 |
| 7.1.3.1 | ( $\pm$ )- <i>anti</i> -4-Fluoropentan-2-ol ( $\pm$ )- <i>anti</i> -A .....                                                                                                            | 117 |
| 7.1.3.2 | ( $\pm$ )- <i>syn</i> -4-Fluoropentan-2-ol ( $\pm$ )- <i>syn</i> -A .....                                                                                                              | 118 |
| 7.2     | Synthesis of 4-fluorobutan-2-ol ( $\pm$ )-B .....                                                                                                                                      | 119 |
| 7.2.1   | 3-Fluoropropanal SI-5.....                                                                                                                                                             | 119 |
| 7.2.2   | 4-Fluorobutan-2-ol ( $\pm$ )-B .....                                                                                                                                                   | 121 |
| 7.3     | Synthesis of 3-fluoro-2,2-dimethylpropan-1-ol C.....                                                                                                                                   | 122 |
| 7.3.1   | 3-Fluoro-2,2-dimethyl-1-( <i>meta</i> -methylbenzoyloxy)-propane SI-6.....                                                                                                             | 122 |
| 7.3.2   | 3-Fluoro-2,2-dimethylpropan-1-ol C.....                                                                                                                                                | 125 |
| 7.4     | Synthesis of ( $\pm$ )-4,4-difluoropentan-2-ol ( $\pm$ )-E .....                                                                                                                       | 126 |
| 7.4.1   | 4,6-Dimethyl-2-phenyl-1,3-dioxane <i>meso</i> -SI-7 and ( $\pm$ )-SI-8.....                                                                                                            | 126 |
| 7.4.2   | (2 <i>S</i> *,4 <i>R</i> *)-4-Benzyloxy-pentan-2-ol ( $\pm$ )- <i>syn</i> -SI-9 and (2 <i>R</i> *,4 <i>R</i> *)-4-benzyloxy-pentan-2-ol ( $\pm$ )- <i>anti</i> -SI-10 .....            | 128 |
| 7.4.3   | ( $\pm$ )-4-Benzyloxy-pentan-2-one ( $\pm$ )-SI-11 .....                                                                                                                               | 130 |

---

|       |                                                     |     |
|-------|-----------------------------------------------------|-----|
| 7.4.4 | (±)-2-Benzyloxy-4,4-difluoropentane (±)-SI-12 ..... | 132 |
| 7.4.5 | (±)-4,4-difluoropentan-2-ol (±)-E .....             | 135 |
| 7.5   | Synthesis of (±)-4,4-difluorobutan-2-ol (±)-F ..... | 136 |
| 7.5.1 | (±)-3-Benzyloxy-butanal (±)-SI-15 .....             | 136 |
| 7.5.2 | (±)-2-Benzyloxy-4,4-difluorobutane (±)-SI-16 .....  | 138 |
| 7.5.3 | (±)-4,4-Difluorobutan-2-ol (±)-F.....               | 142 |
| 7.6   | Synthesis of 3,3-difluoropropan-1-ol G.....         | 143 |
| 7.6.1 | 1-Benzyloxy-3,3-difluoropropane SI-17 .....         | 143 |
| 7.6.2 | 3,3-Difluoropropan-1-ol G .....                     | 146 |

## 7 Copies of all spectra

### 7.1 Synthesis of ( $\pm$ )-*syn* and ( $\pm$ )-*anti*-4-fluoropentan-2-ol (( $\pm$ )-*syn*-A and ( $\pm$ )-*anti*-A)

#### 7.1.1 Isolation of *meso*-2,4-pentanediol (*meso*-SI-1) and ( $\pm$ )-2,4-pentanediol (( $\pm$ )-SI-2) from a commercial mixture of *meso* and *racemic* isomers

##### 7.1.1.1 *meso*-2,4-Pentanediol (*meso*-SI-1)

$^1\text{H}$  NMR,  $\text{CDCl}_3$ , 400 MHz

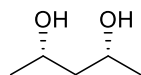

*meso*-SI-1

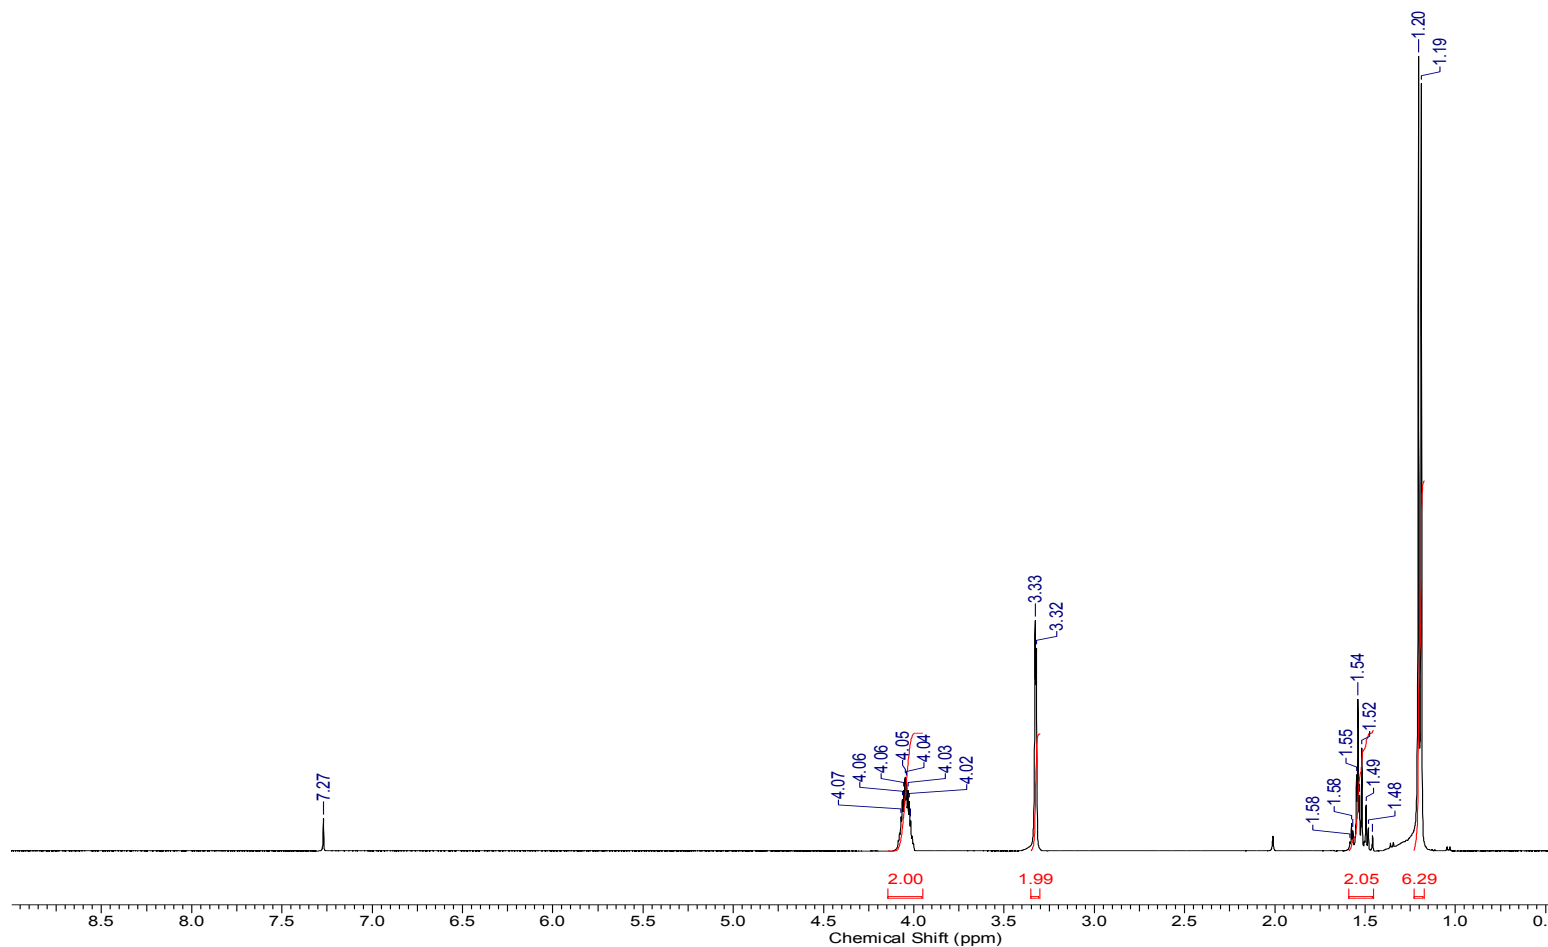



$^{13}\text{C}$  NMR,  $\text{CDCl}_3$ , 101 MHz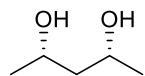*meso*-SI-1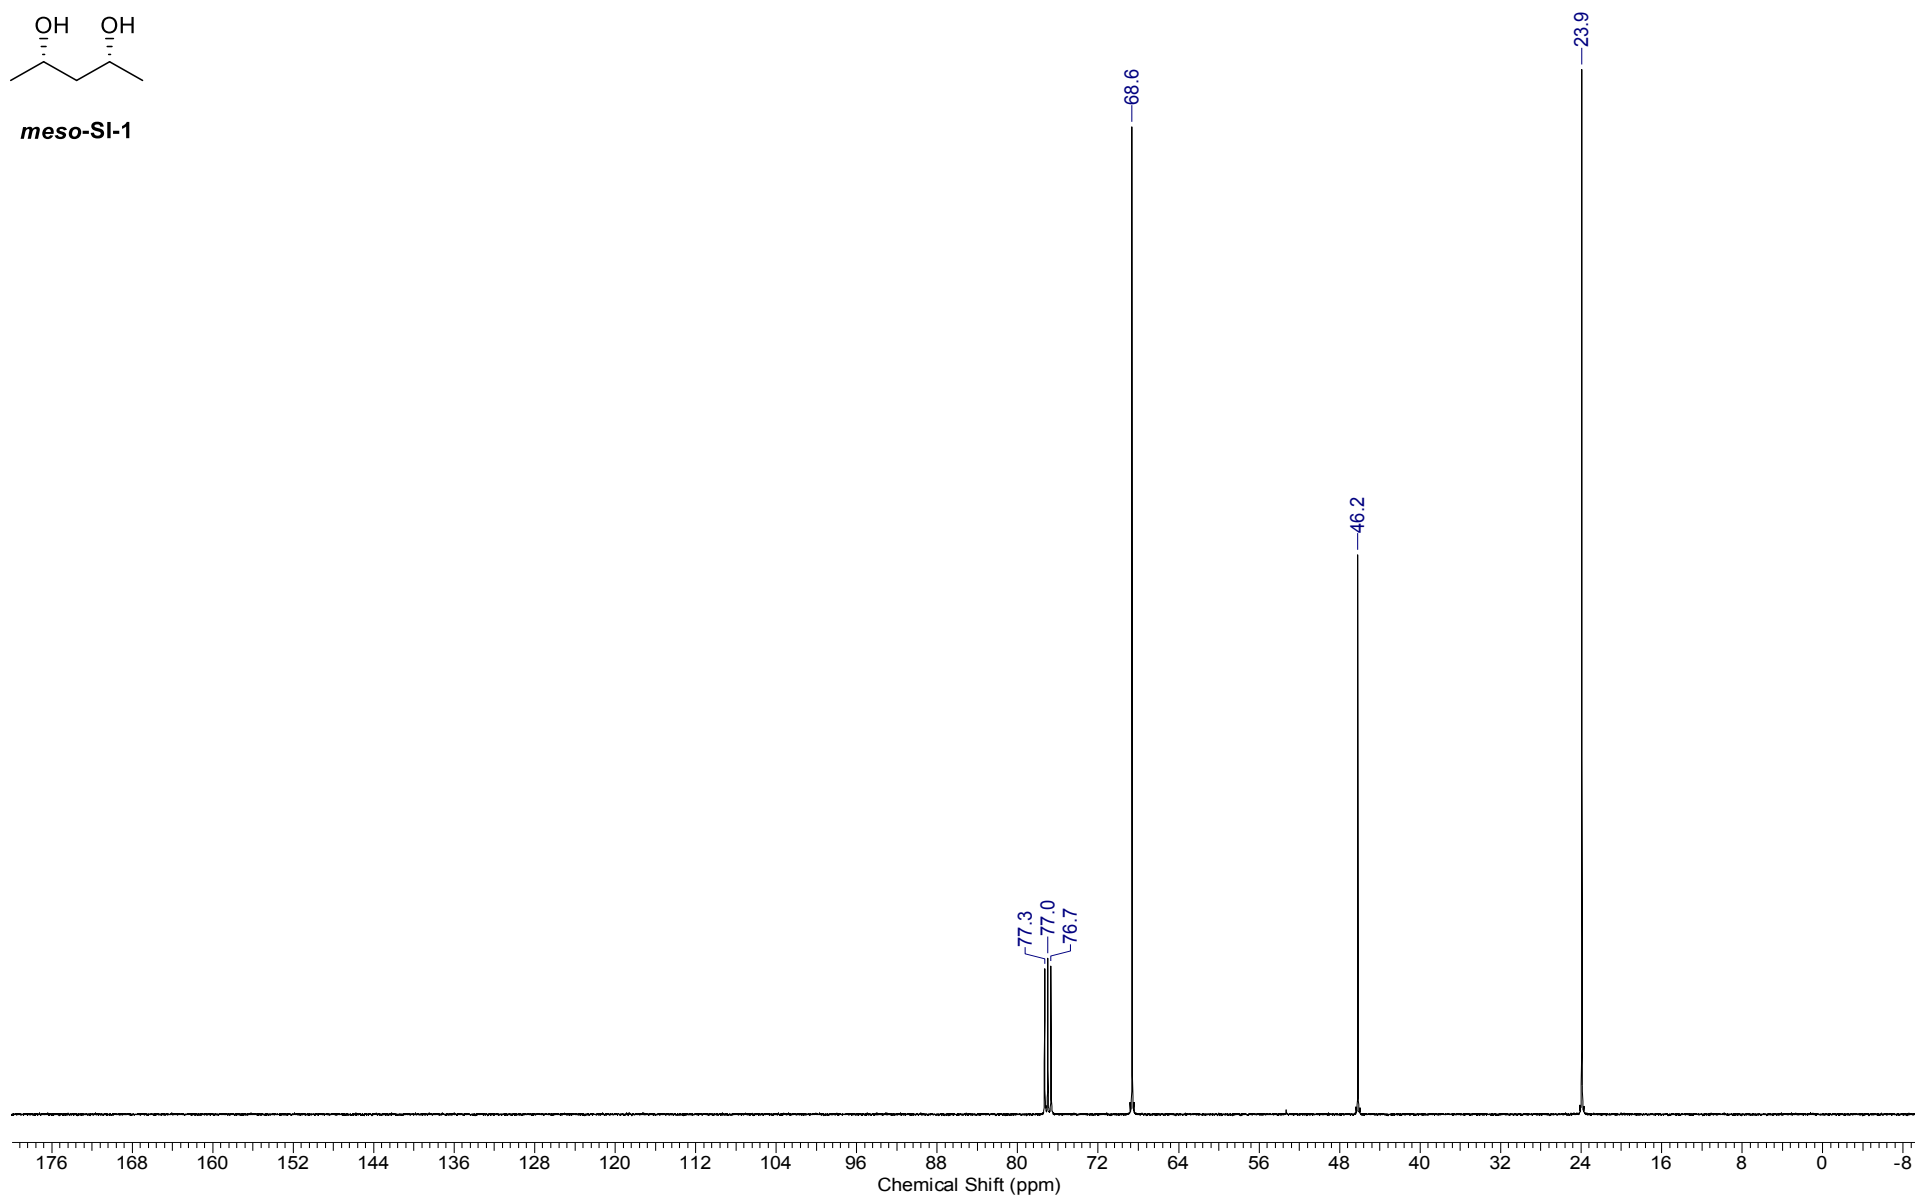

7.1.1.2 ( $\pm$ )-2,4-Pentanediol (( $\pm$ )-SI-2) $^1\text{H}$  NMR,  $\text{CDCl}_3$ , 400 MHz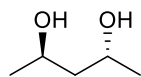( $\pm$ )-SI-2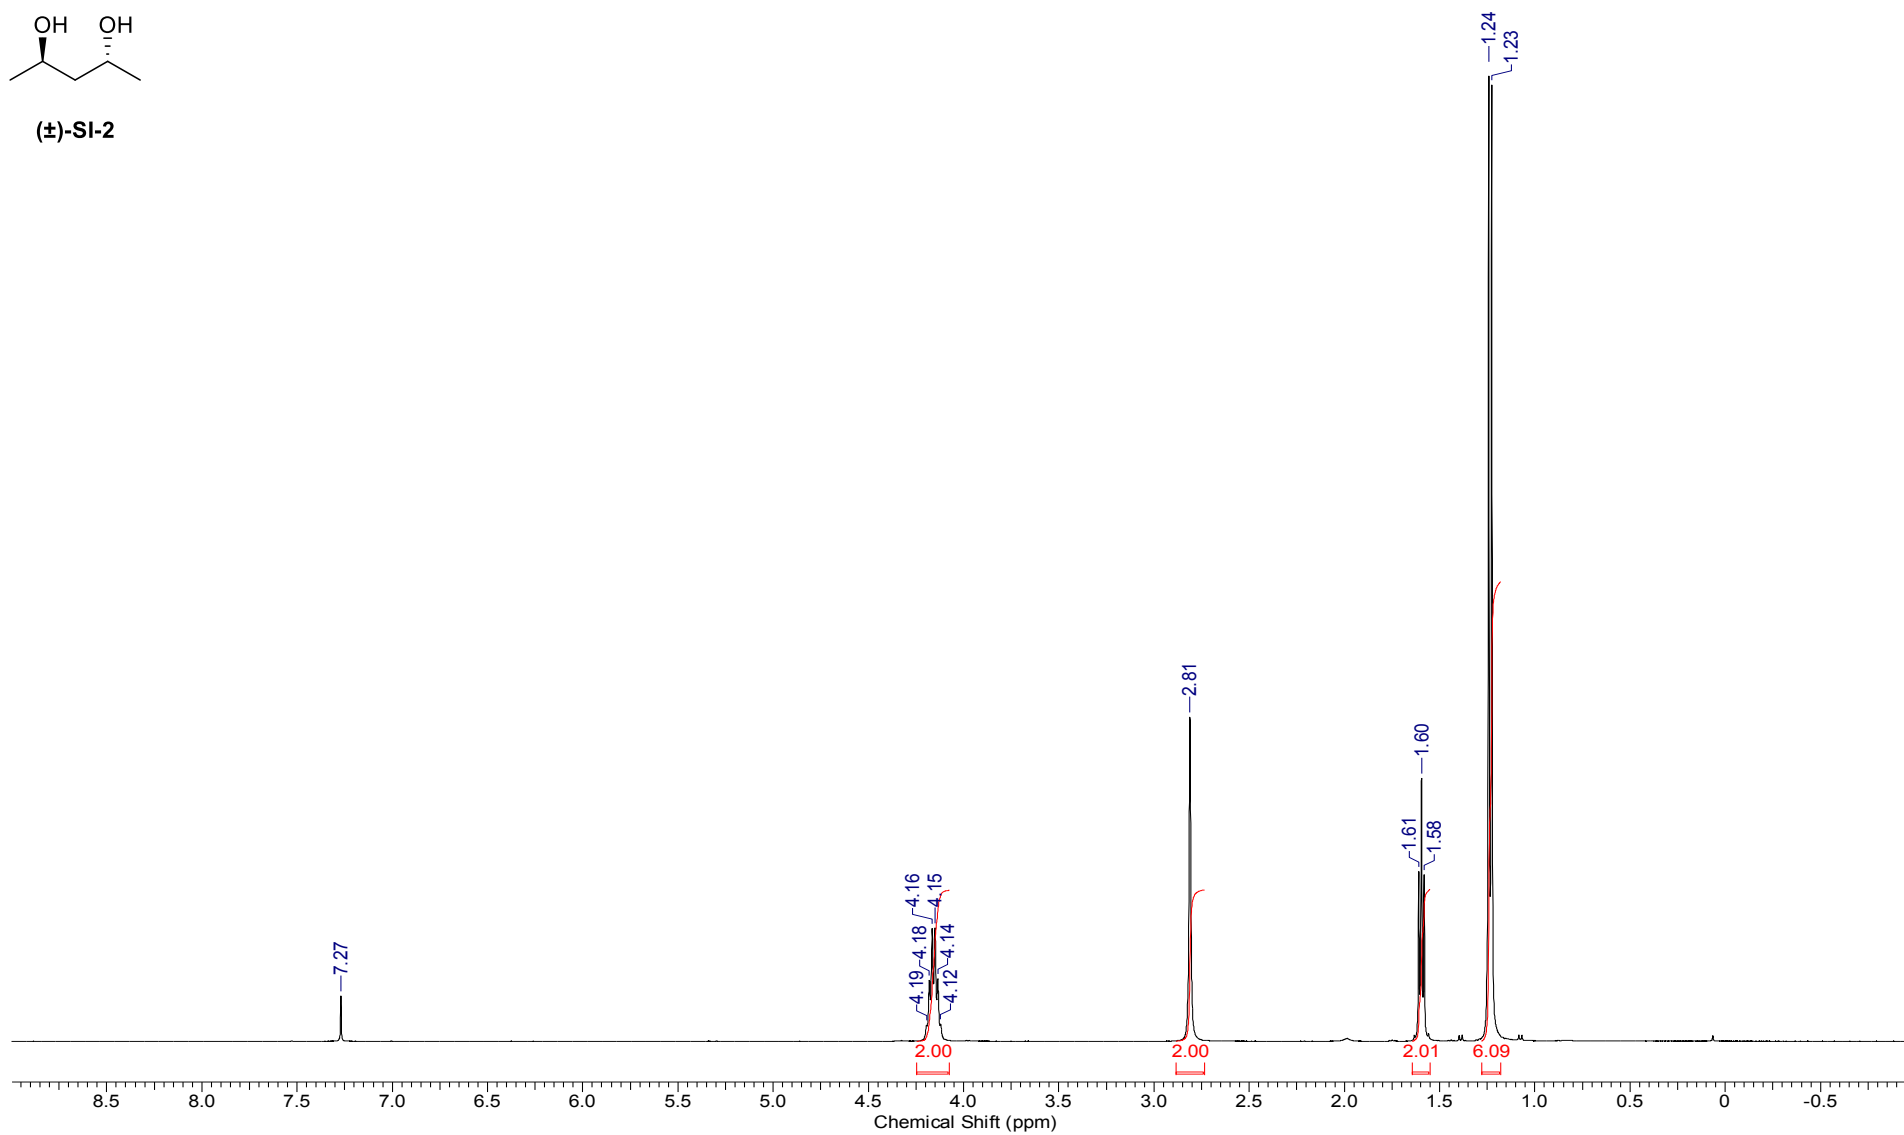

$^{13}\text{C}$  NMR,  $\text{CDCl}_3$ , 101 MHz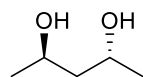**(±)-SI-2**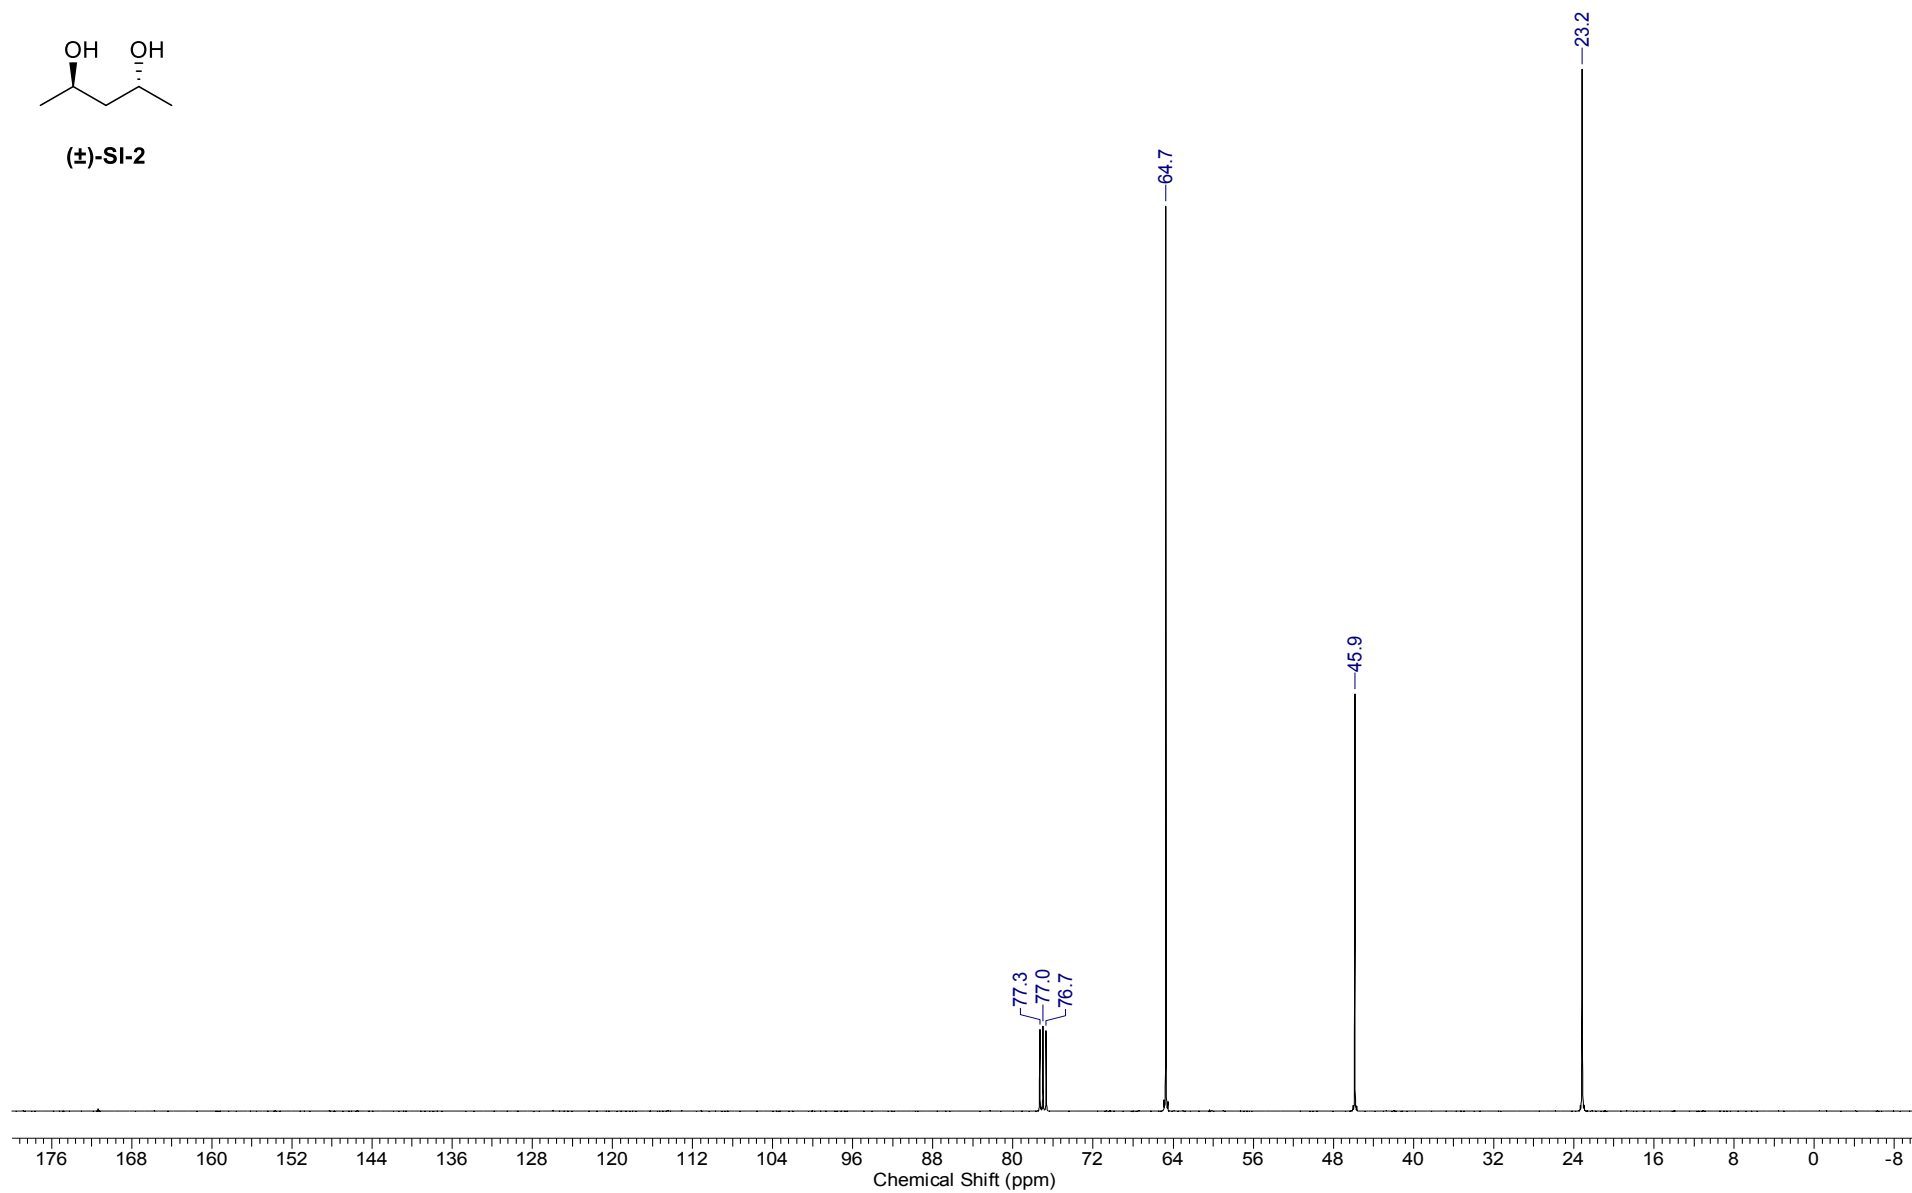

**7.1.2 (±)-anti and (±)-syn-2-(3'-Methylbenzoyloxy)-4-fluoropentane (±)-anti-SI-3 and (±)-syn-SI-4****7.1.2.1 (±)-anti-2-(3'-Methylbenzoyloxy)-4-fluoropentane (±)-anti-SI-3**<sup>1</sup>H NMR, CDCl<sub>3</sub>, 400 MHz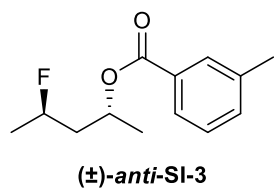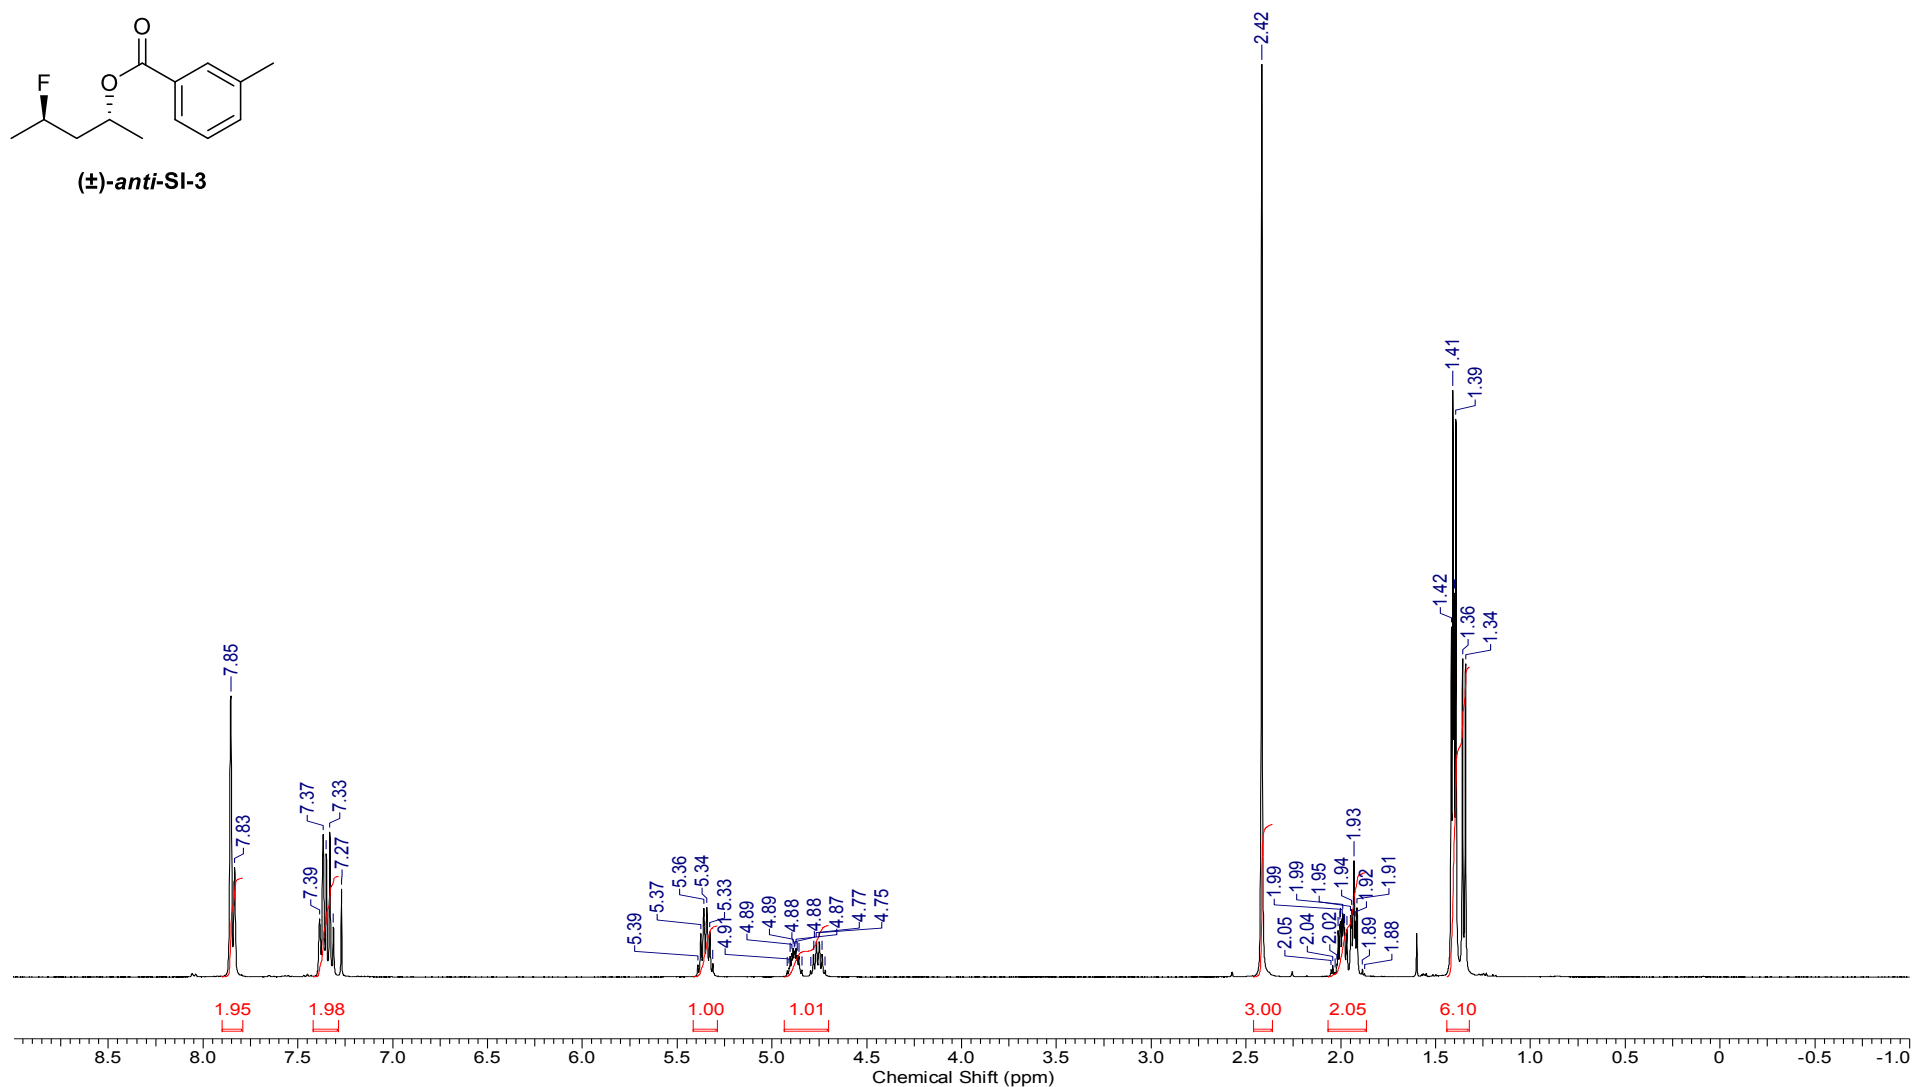

$^{13}\text{C}$  NMR,  $\text{CDCl}_3$ , 101 MHz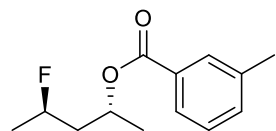**(±)-anti-SI-3**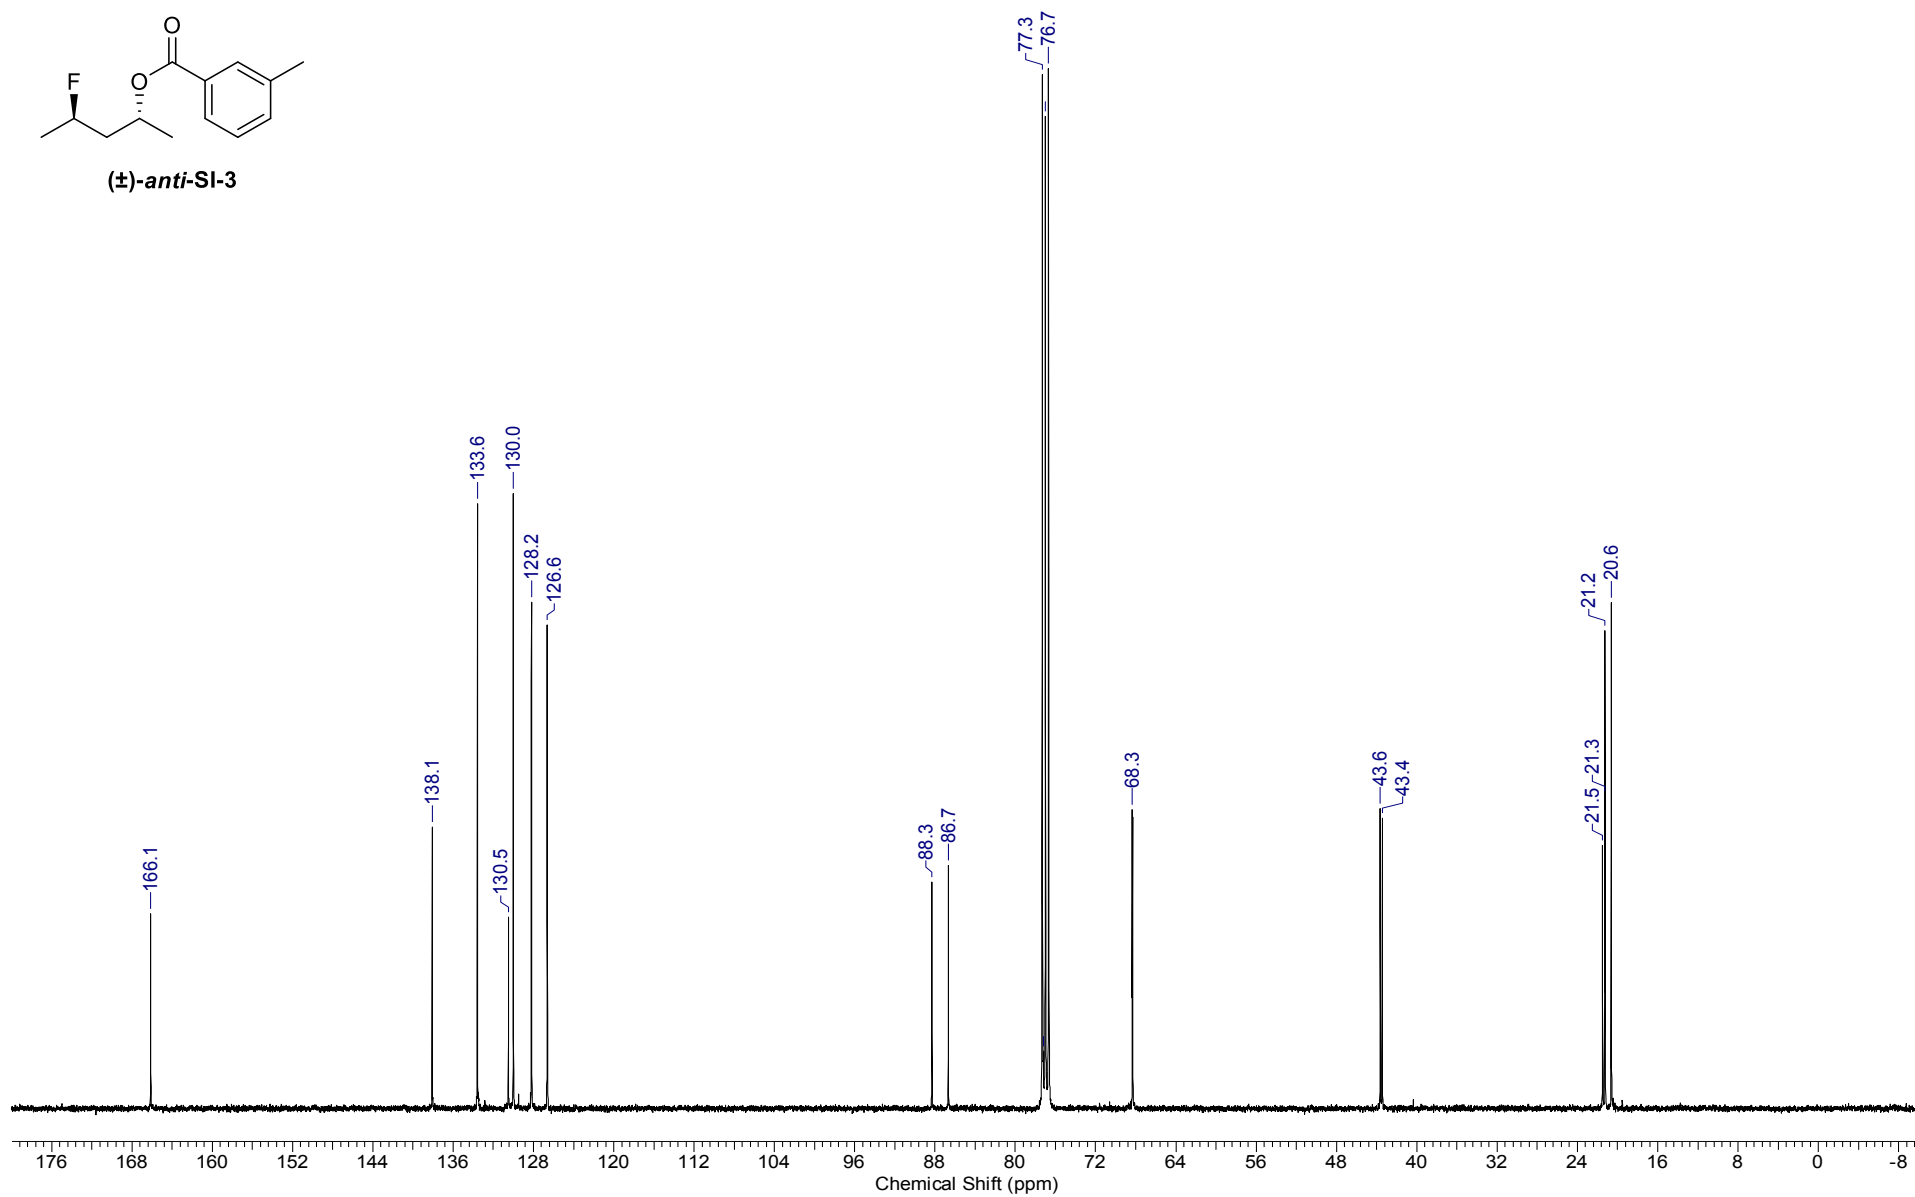

$^{19}\text{F}$  NMR,  $\text{CDCl}_3$ , 376 MHz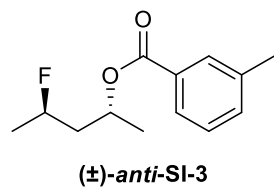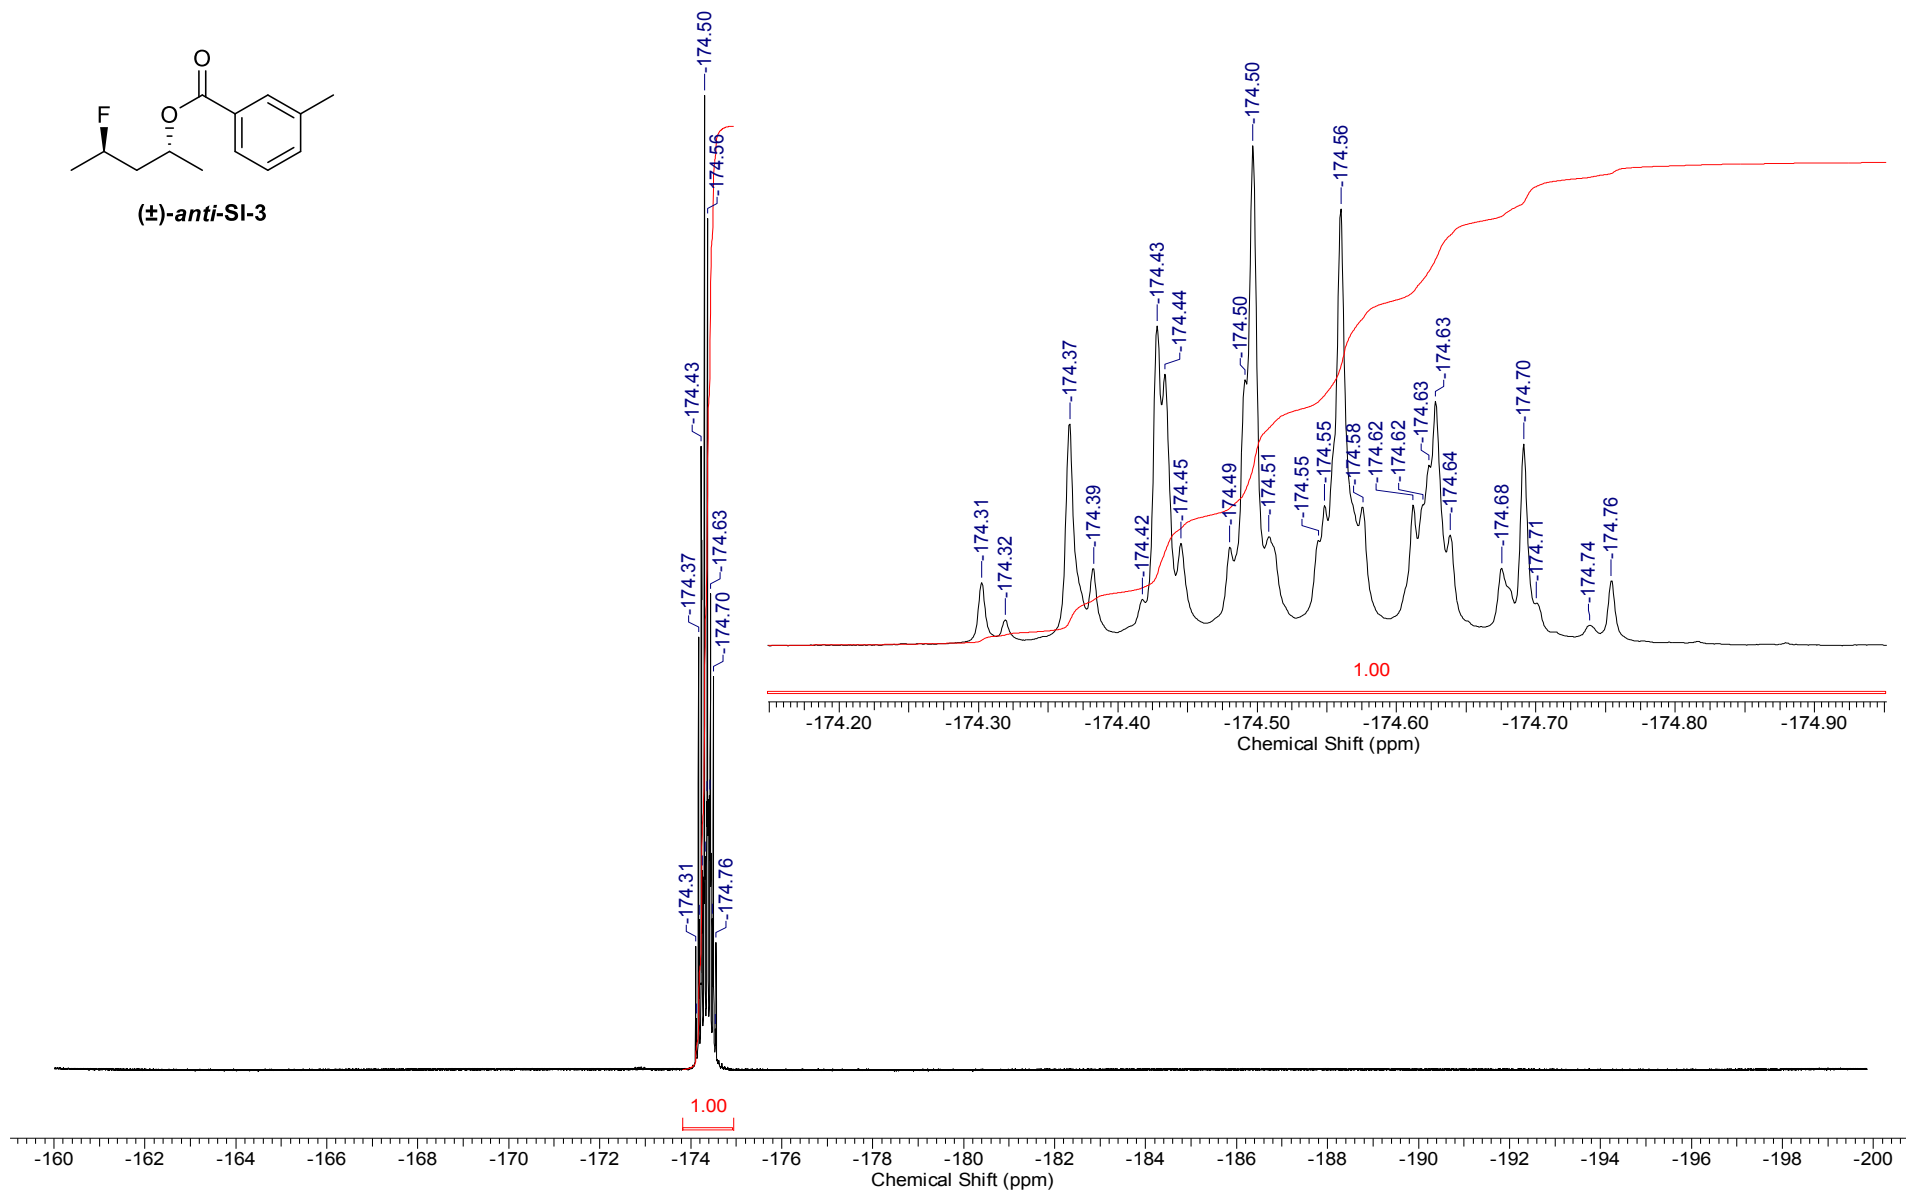

7.1.2.2 ( $\pm$ )-*syn*-2-(3'-Methylbenzoyloxy)-4-fluoropentane ( $\pm$ )-*syn*-SI-4 $^1\text{H}$  NMR,  $\text{CDCl}_3$ , 400 MHz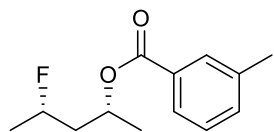**( $\pm$ )-*syn*-SI-4**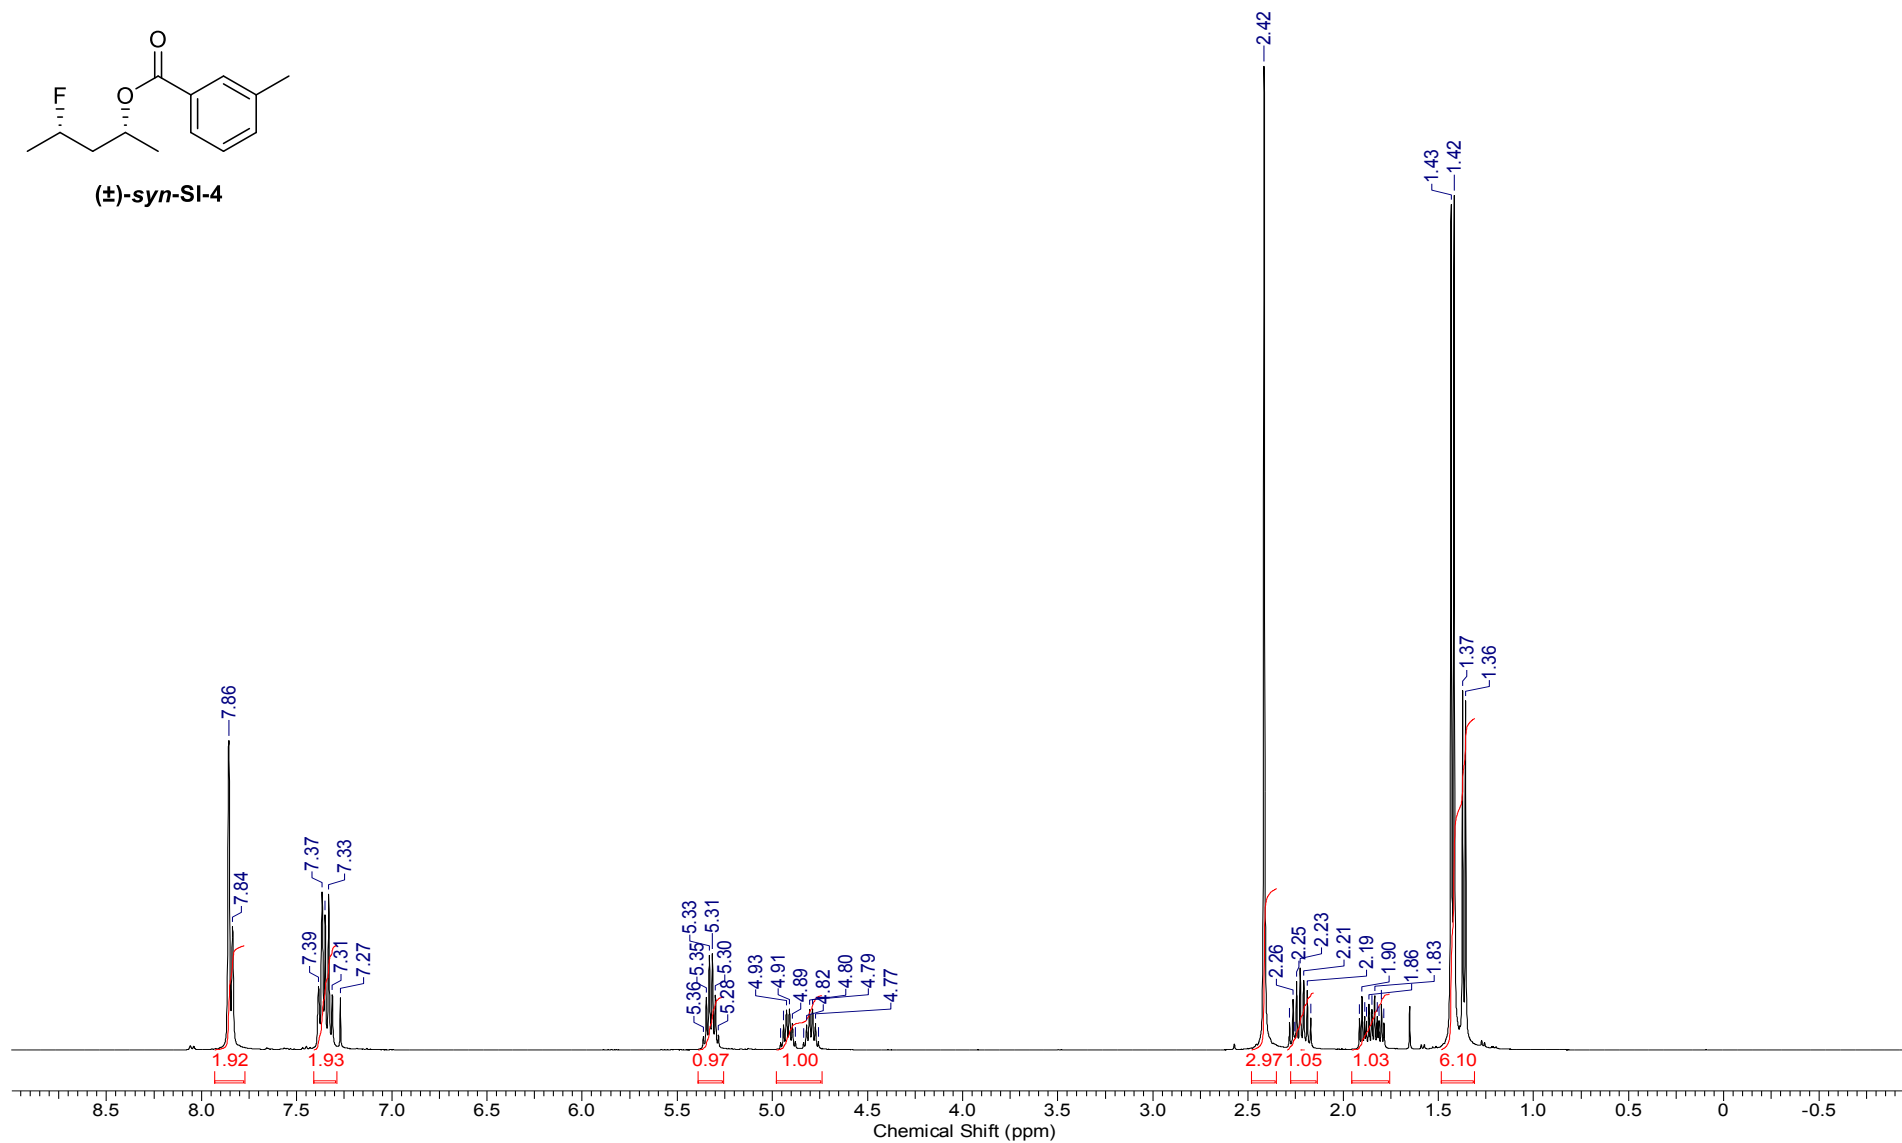

$^{13}\text{C}$  NMR,  $\text{CDCl}_3$ , 101 MHz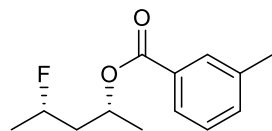**(±)-syn-SI-4**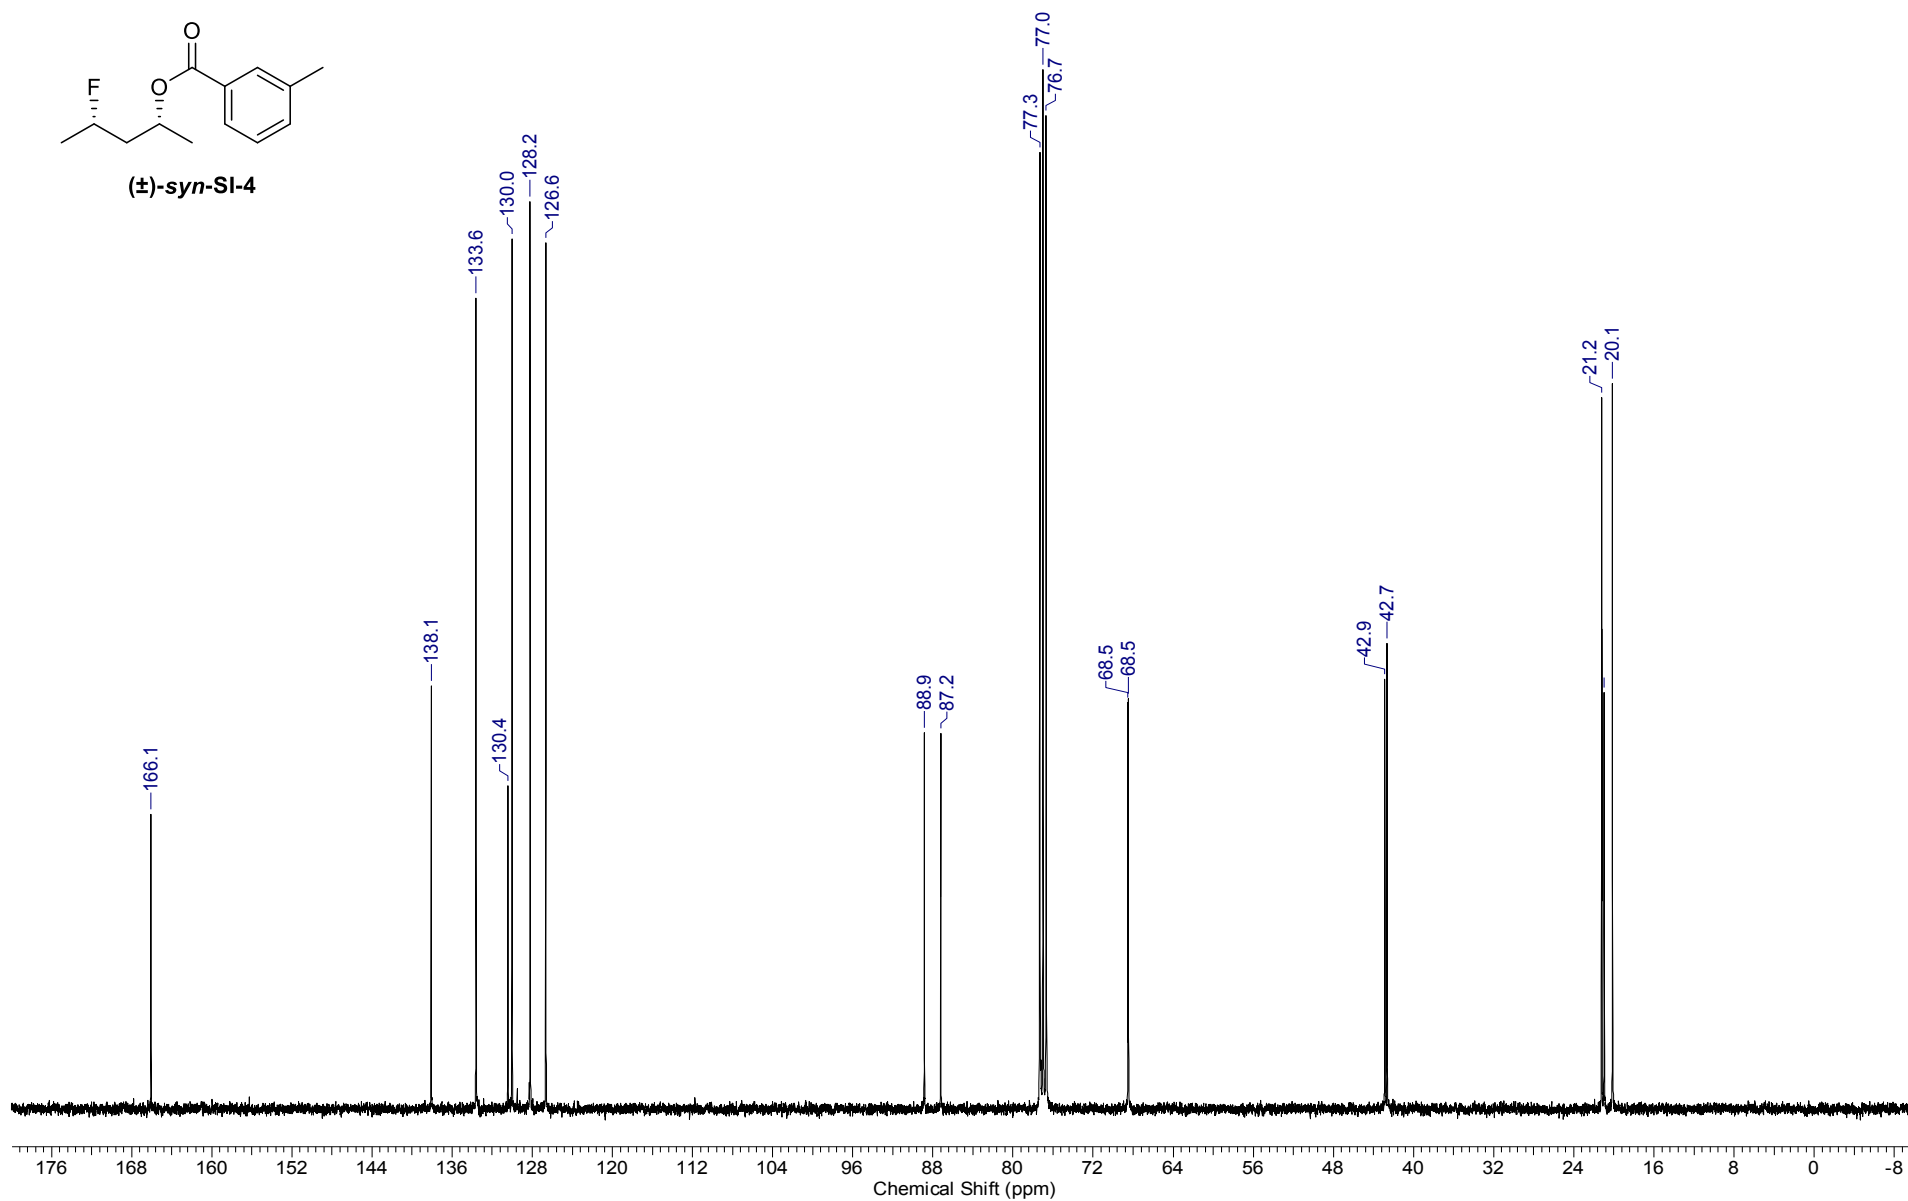



$^{19}\text{F}$  NMR,  $\text{CDCl}_3$ , 376 MHz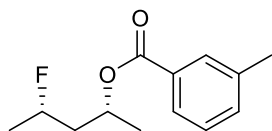**(±)-syn-SI-4**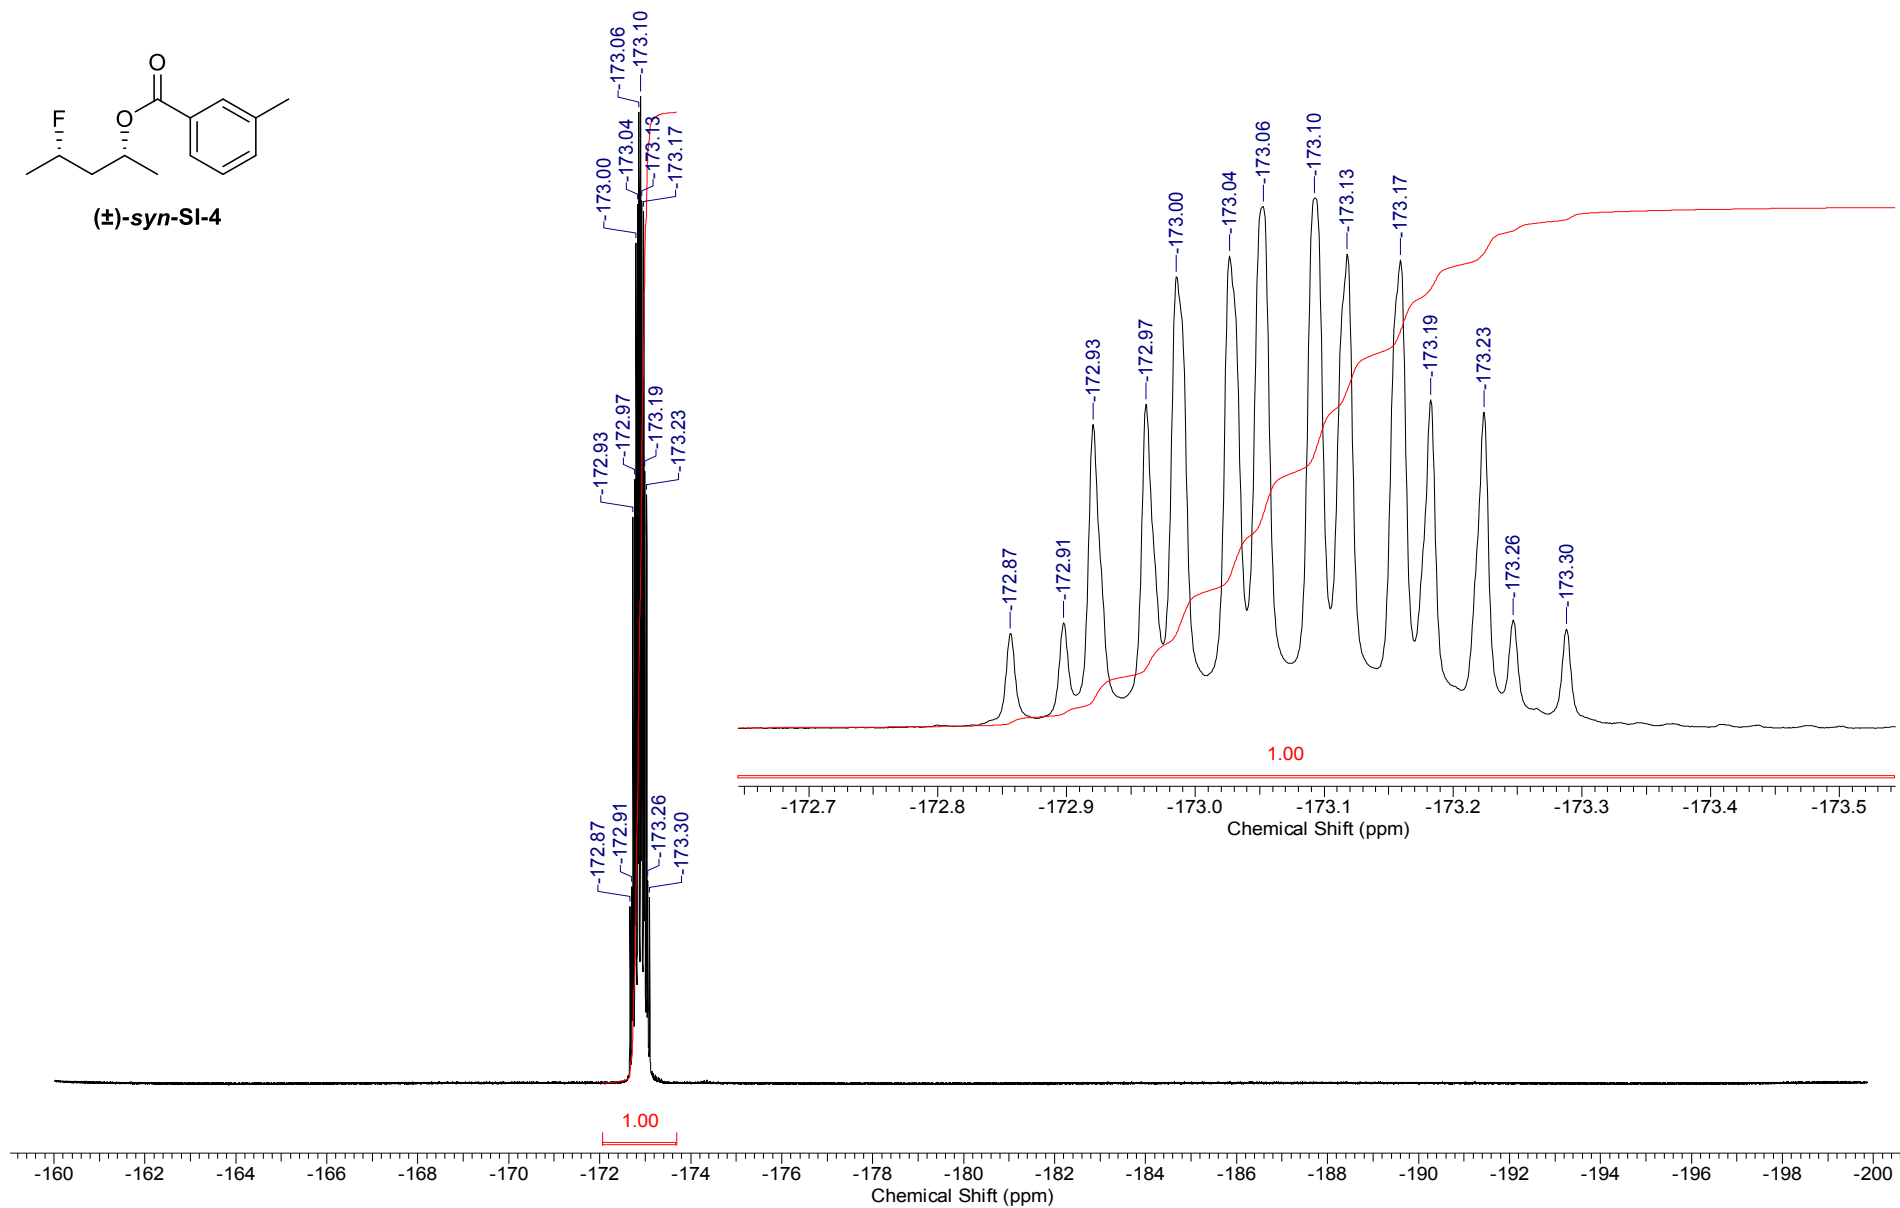

### 7.1.3 Fluorohydrins ( $\pm$ )-*anti*-A and ( $\pm$ )-*syn*-A

#### 7.1.3.1 ( $\pm$ )-*anti*-4-Fluoropentan-2-ol ( $\pm$ )-*anti*-A

$^{13}\text{C}$  NMR,  $\text{CDCl}_3$ , 101 MHz

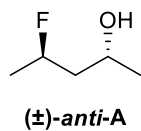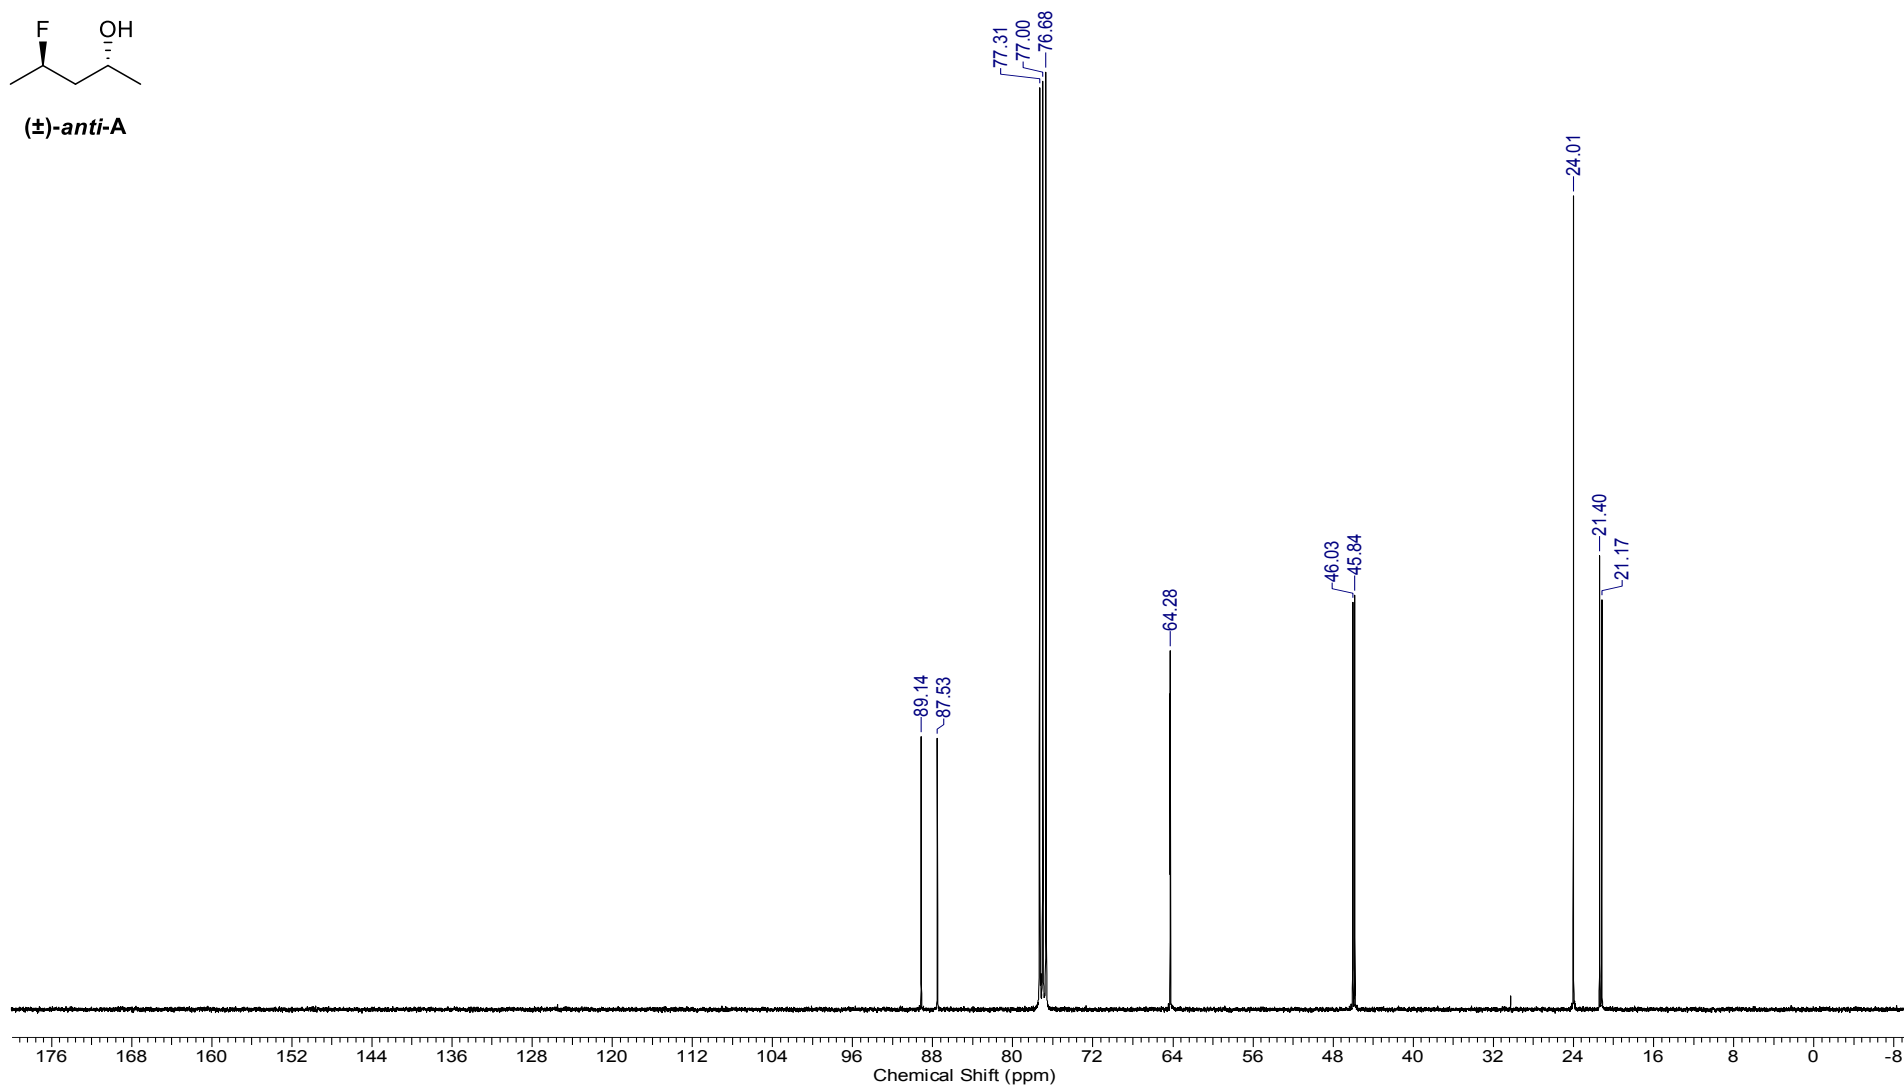

7.1.3.2 ( $\pm$ )-*syn*-4-Fluoropentan-2-ol ( $\pm$ )-*syn*-A $^{13}\text{C}$  NMR,  $\text{CDCl}_3$ , 101 MHz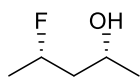 $(\pm)$ -*syn*-A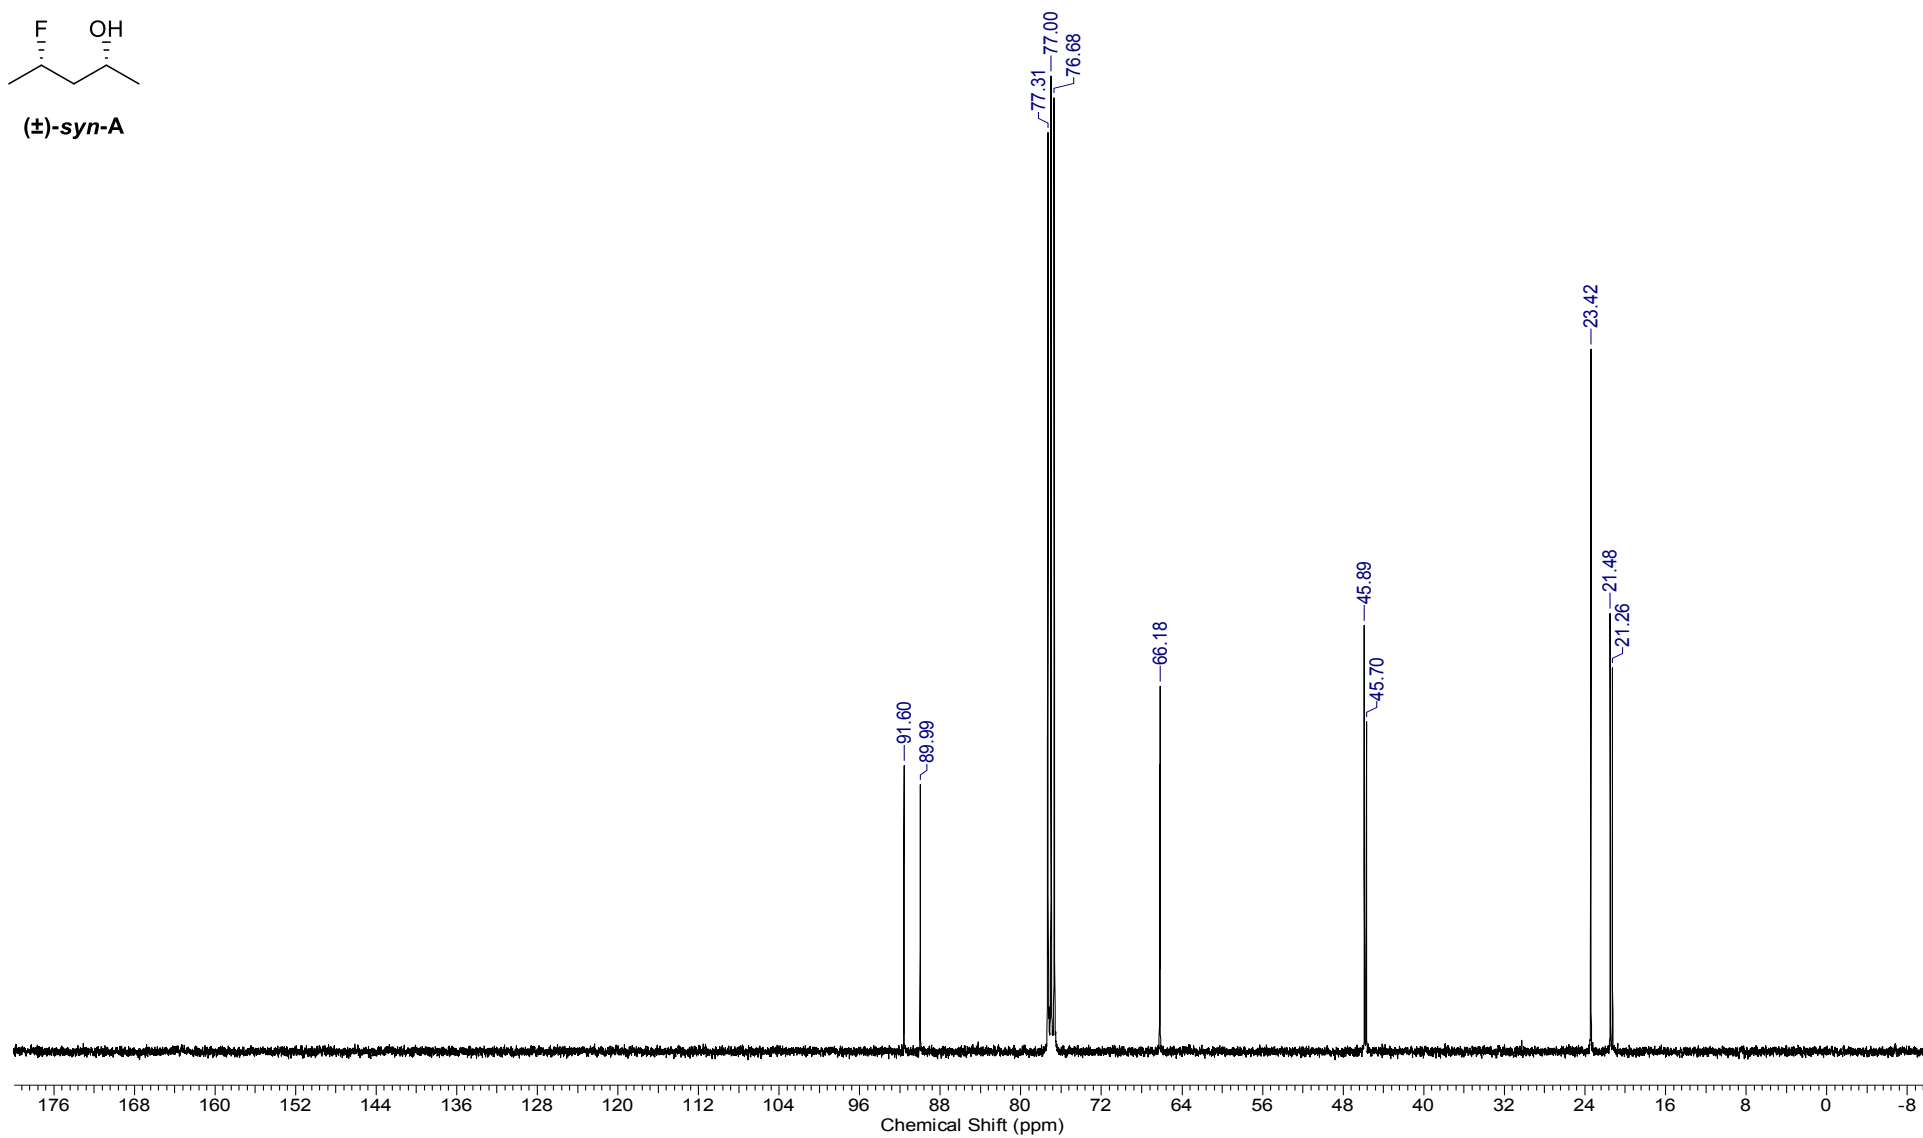

7.2 Synthesis of 4-fluorobutan-2-ol ( $\pm$ )-B

## 7.2.1 3-Fluoropropanal SI-5

 $^1\text{H}$  NMR,  $\text{CDCl}_3$ , 400 MHz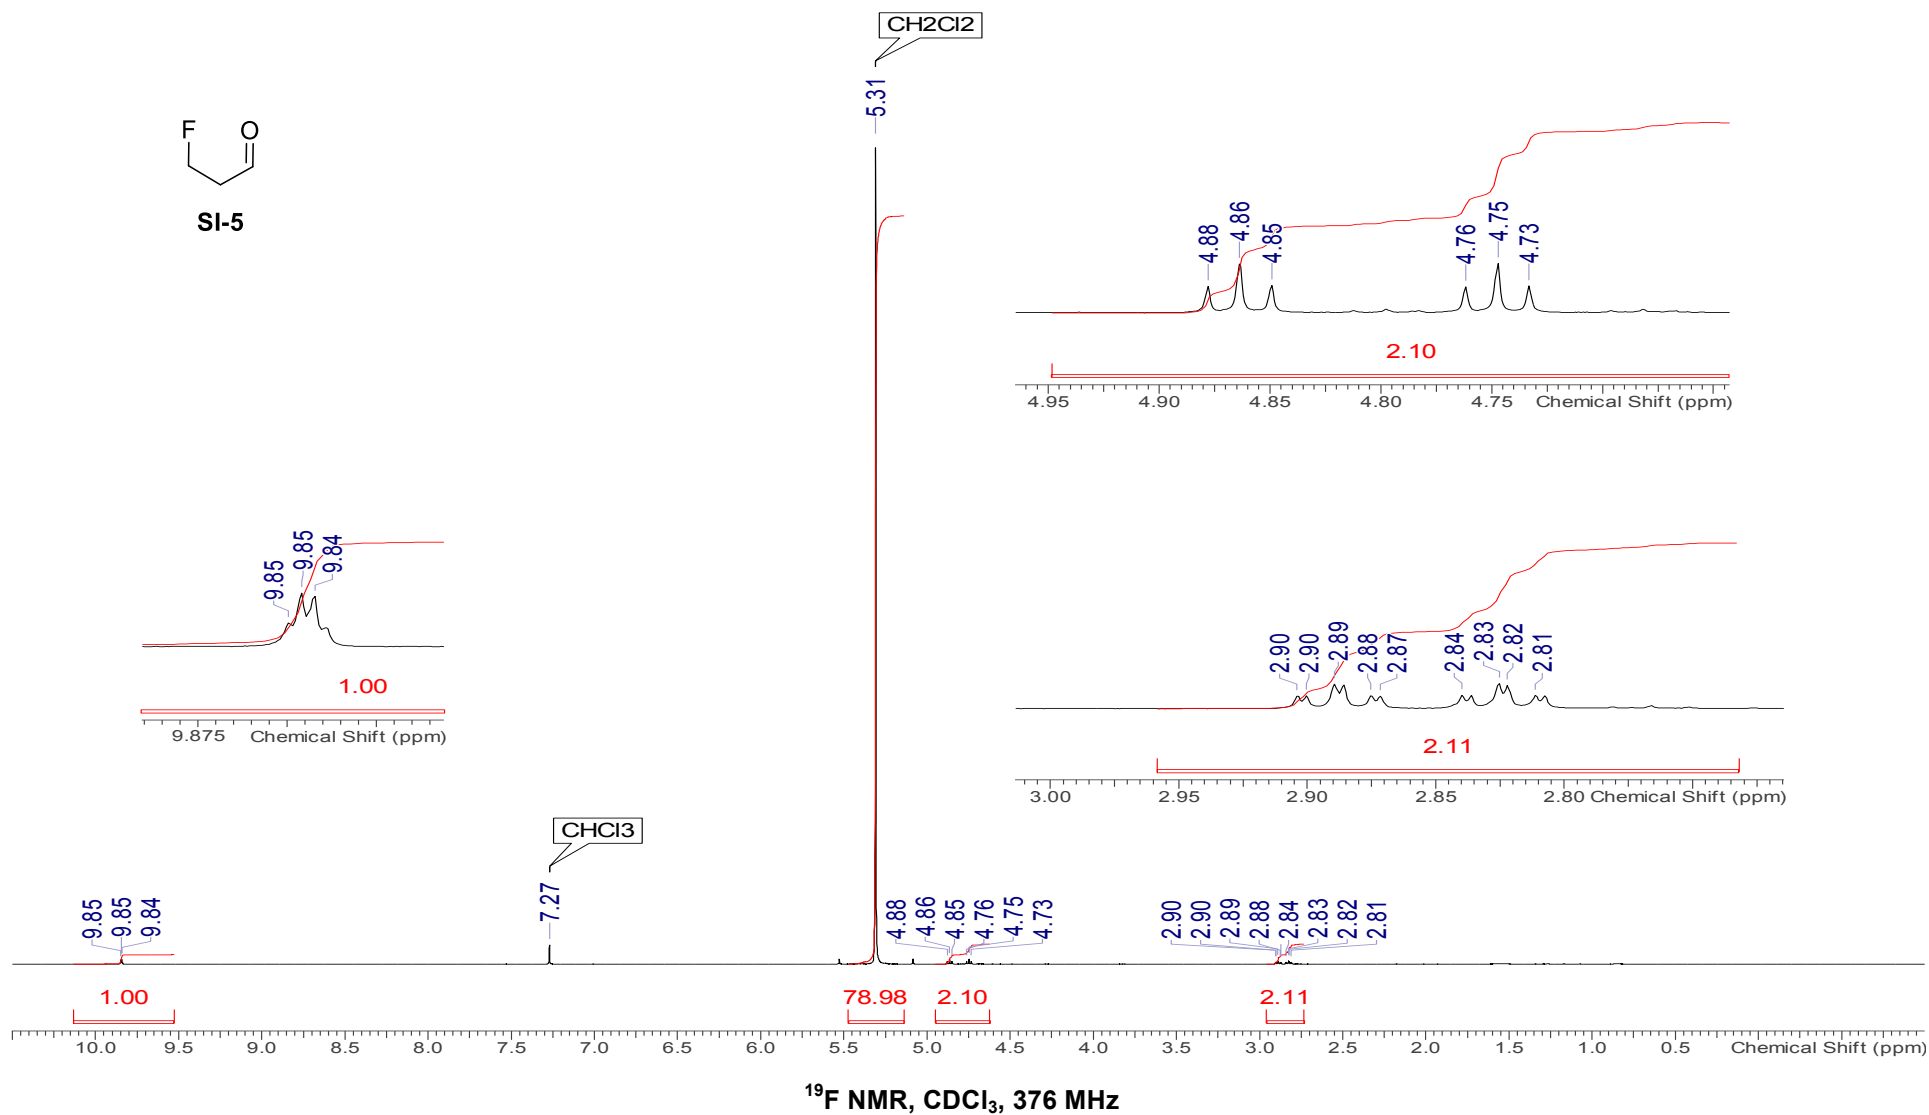

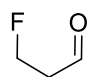

SI-5

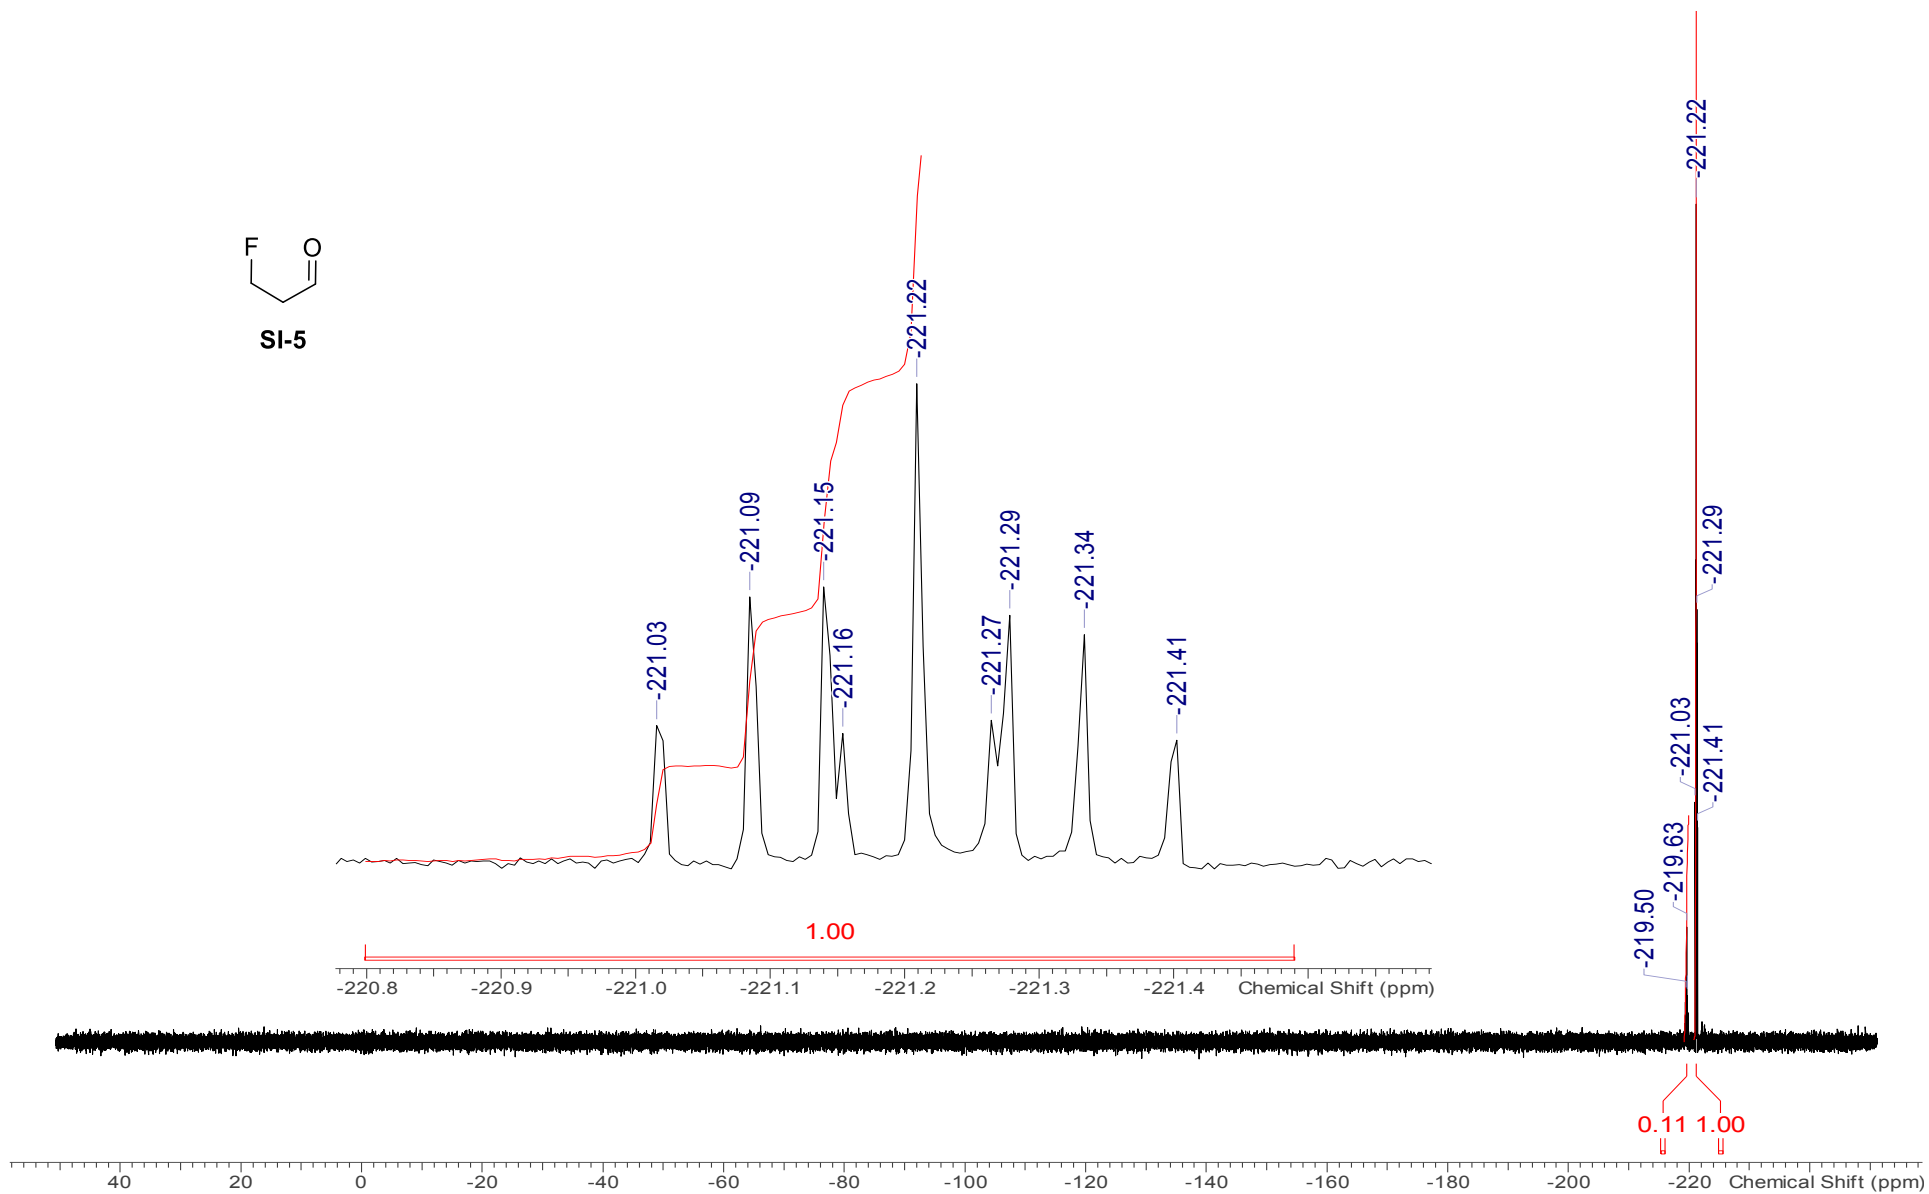

7.2.2 4-Fluorobutan-2-ol ( $\pm$ )-B $^{13}\text{C}$  NMR,  $\text{CDCl}_3$ , 101 MHz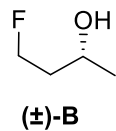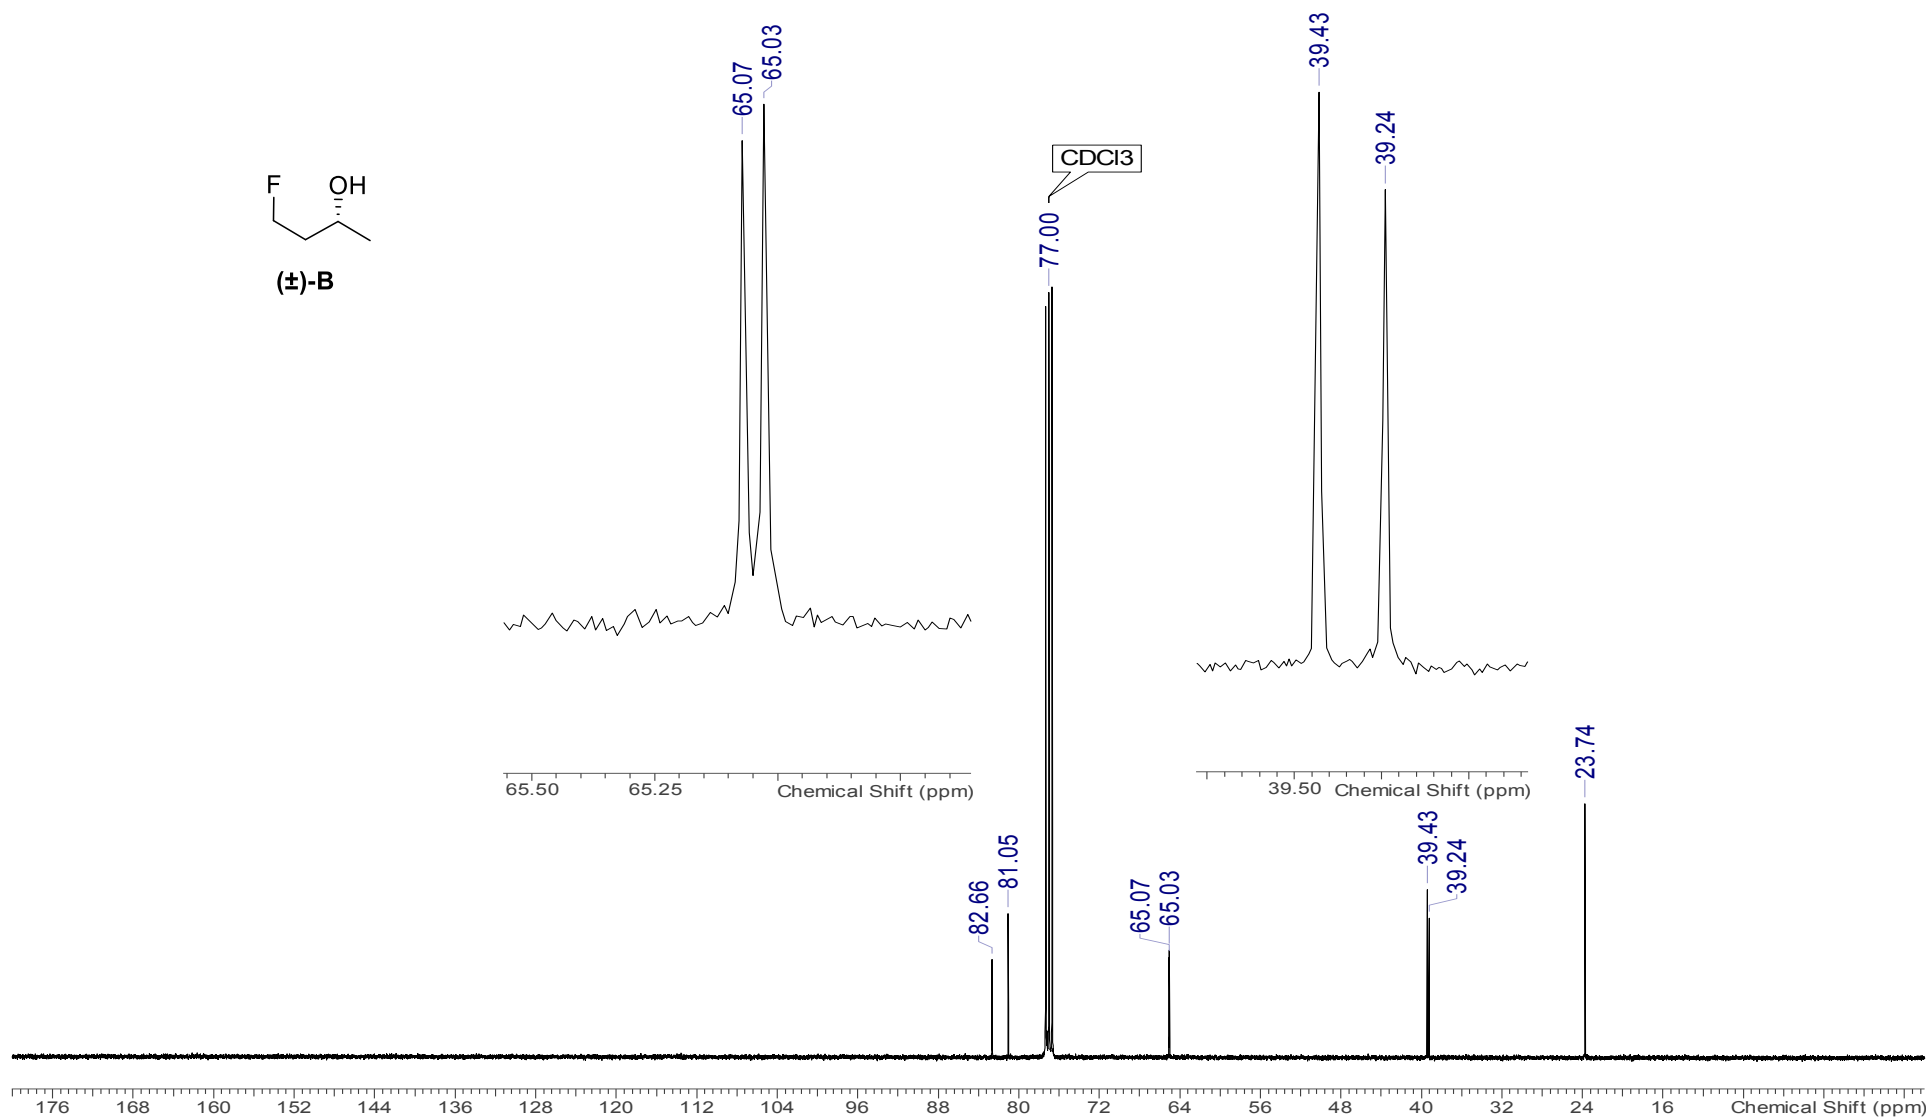

### 7.3 Synthesis of 3-fluoro-2,2-dimethylpropan-1-ol C

#### 7.3.1 3-Fluoro-2,2-dimethyl-1-(*meta*-methylbenzoyloxy)-propane SI-6

$^1\text{H}$  NMR,  $\text{CDCl}_3$ , 400 MHz

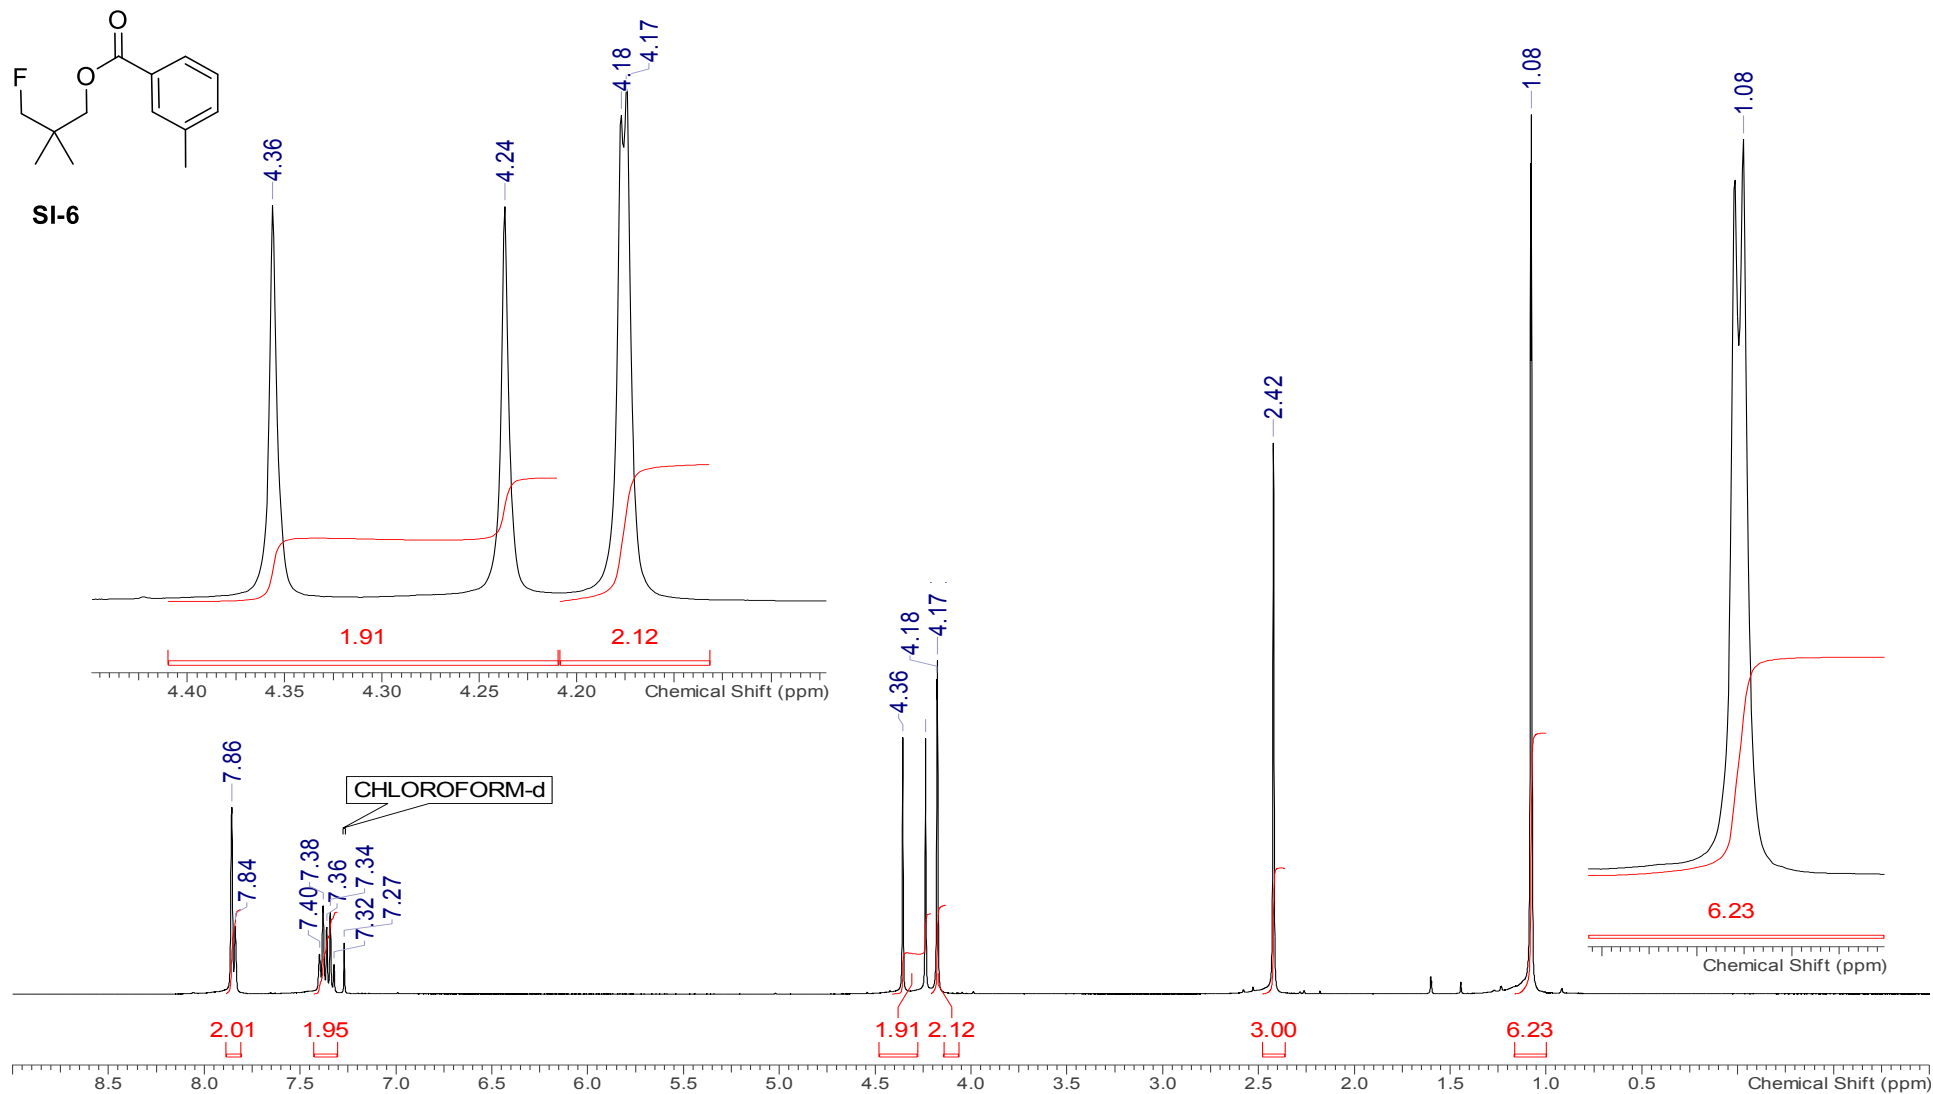

$^{13}\text{C}$  NMR,  $\text{CDCl}_3$ , 101 MHz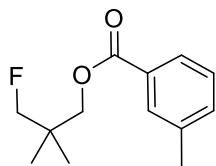

SI-6

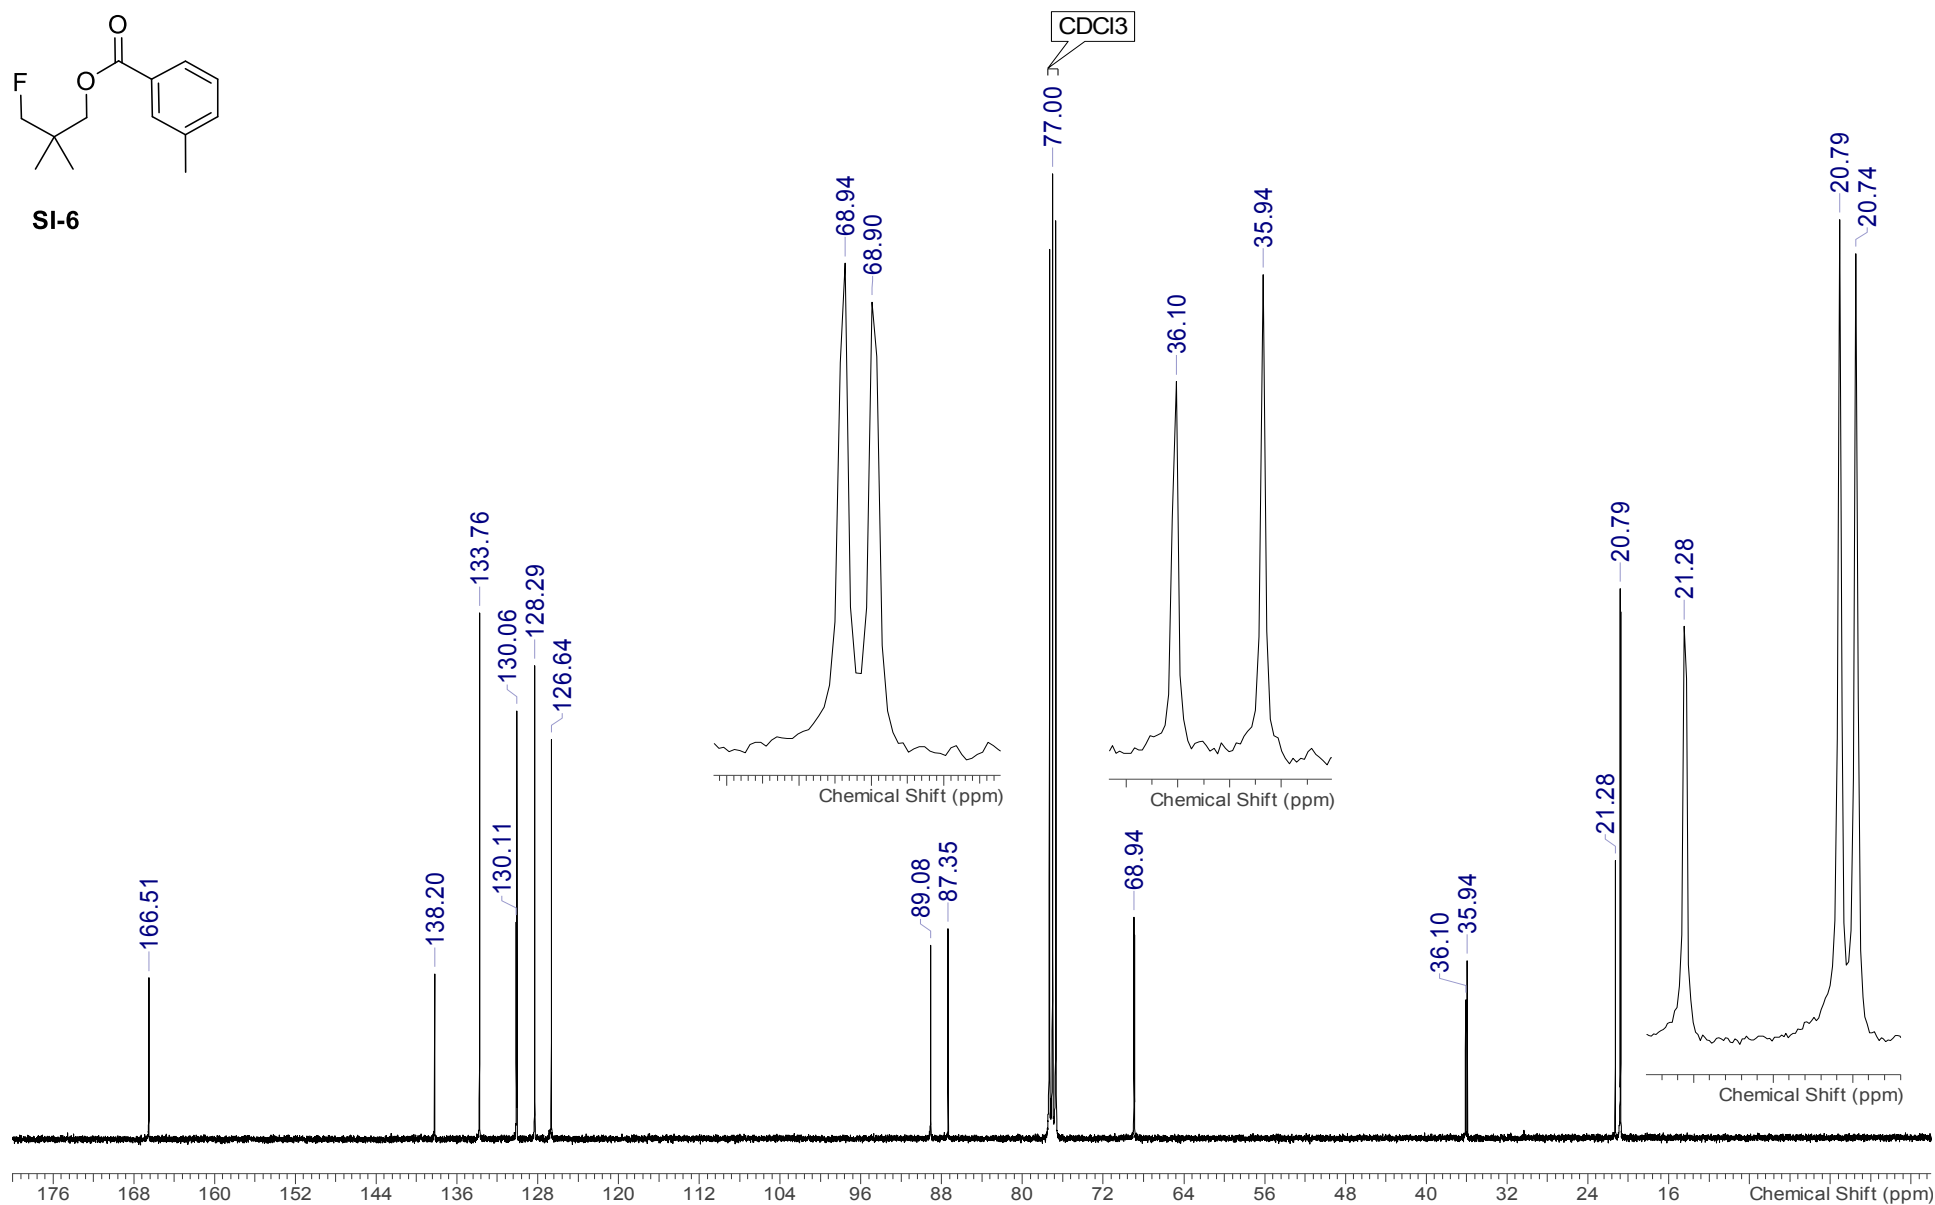



$^{19}\text{F}$  NMR,  $\text{CDCl}_3$ , 376 MHz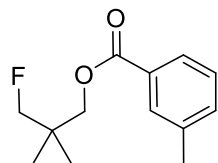

SI-6

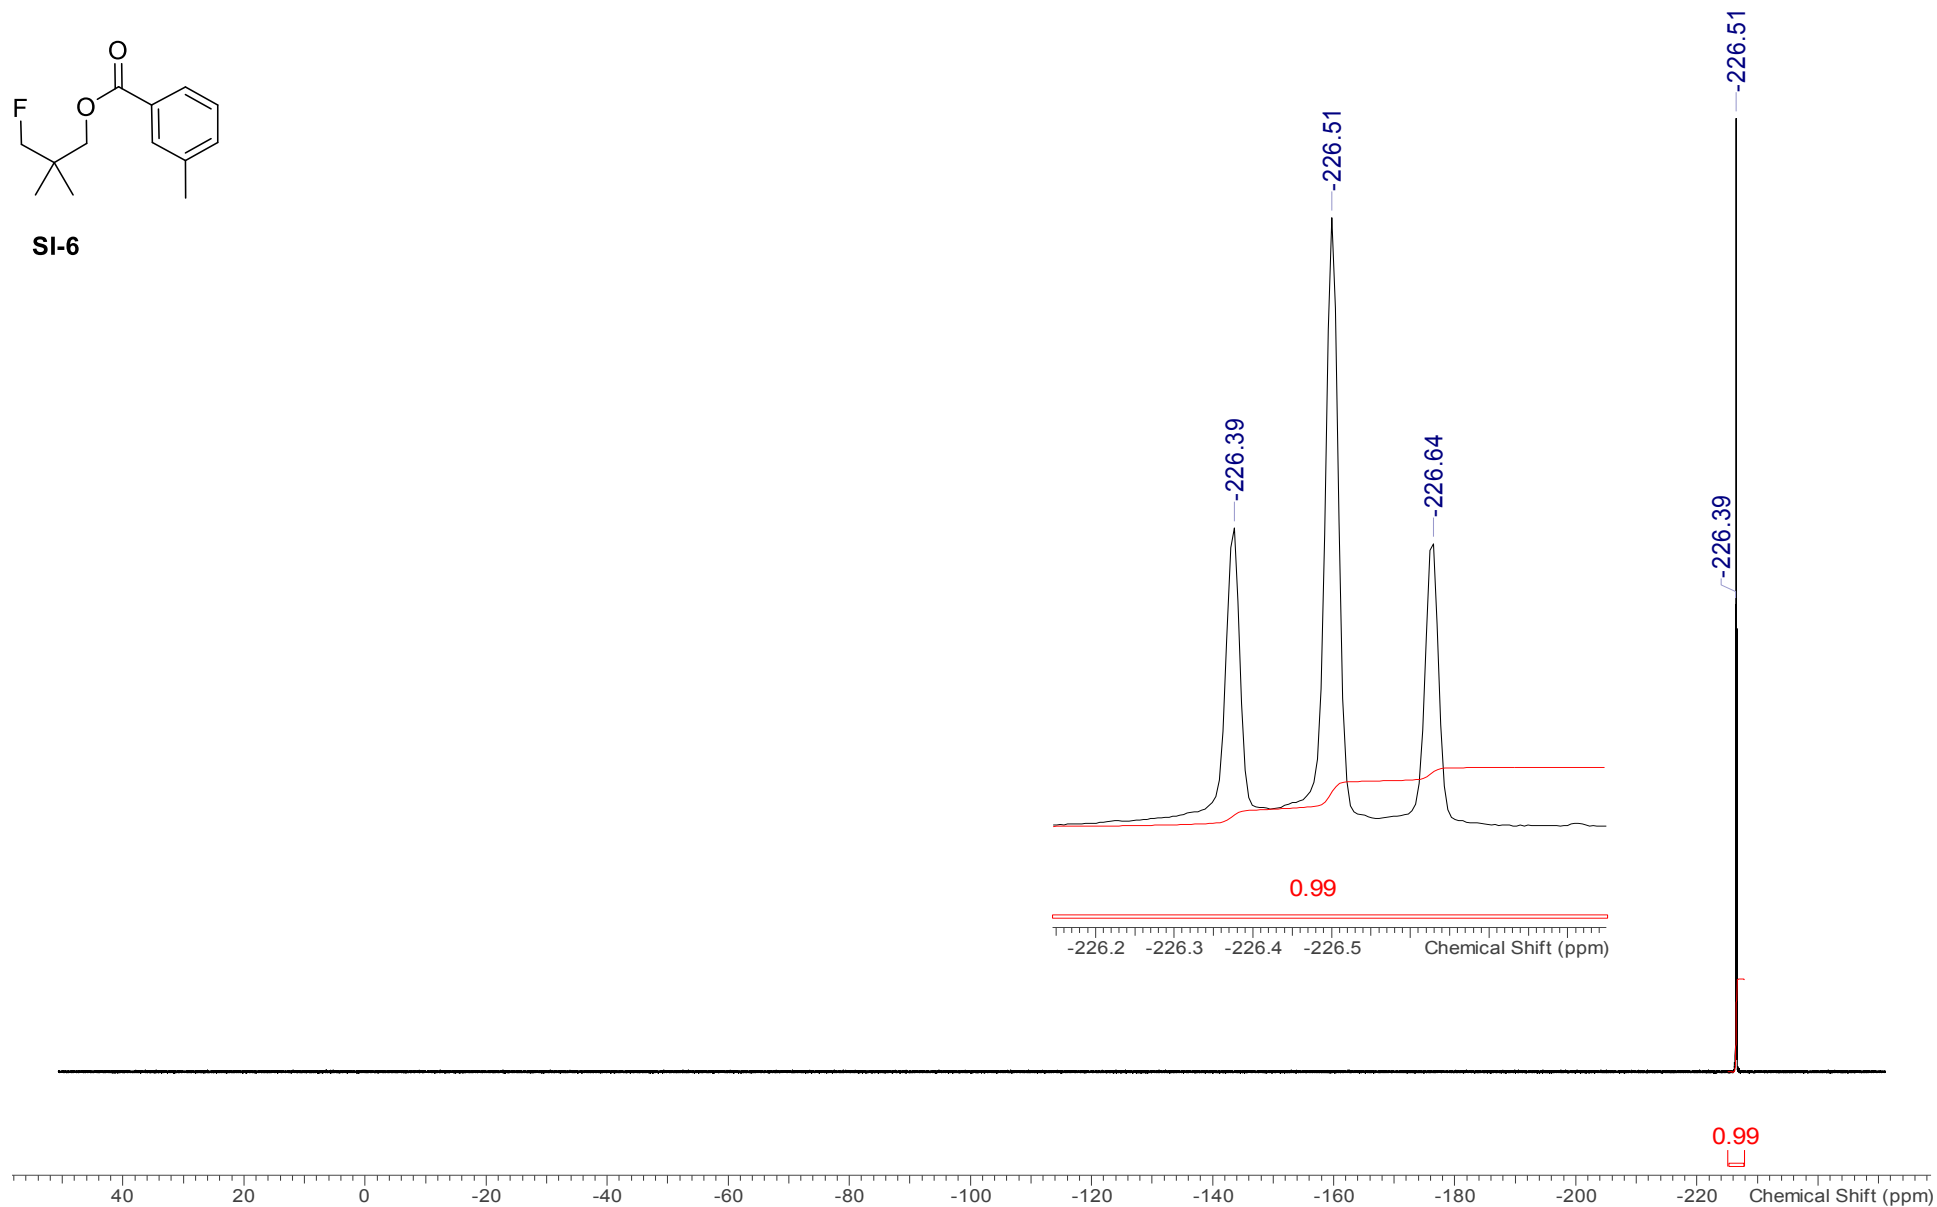

## 7.3.2 3-Fluoro-2,2-dimethylpropan-1-ol C

 $^{13}\text{C}$  NMR,  $\text{CDCl}_3$ , 101 MHz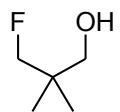

C

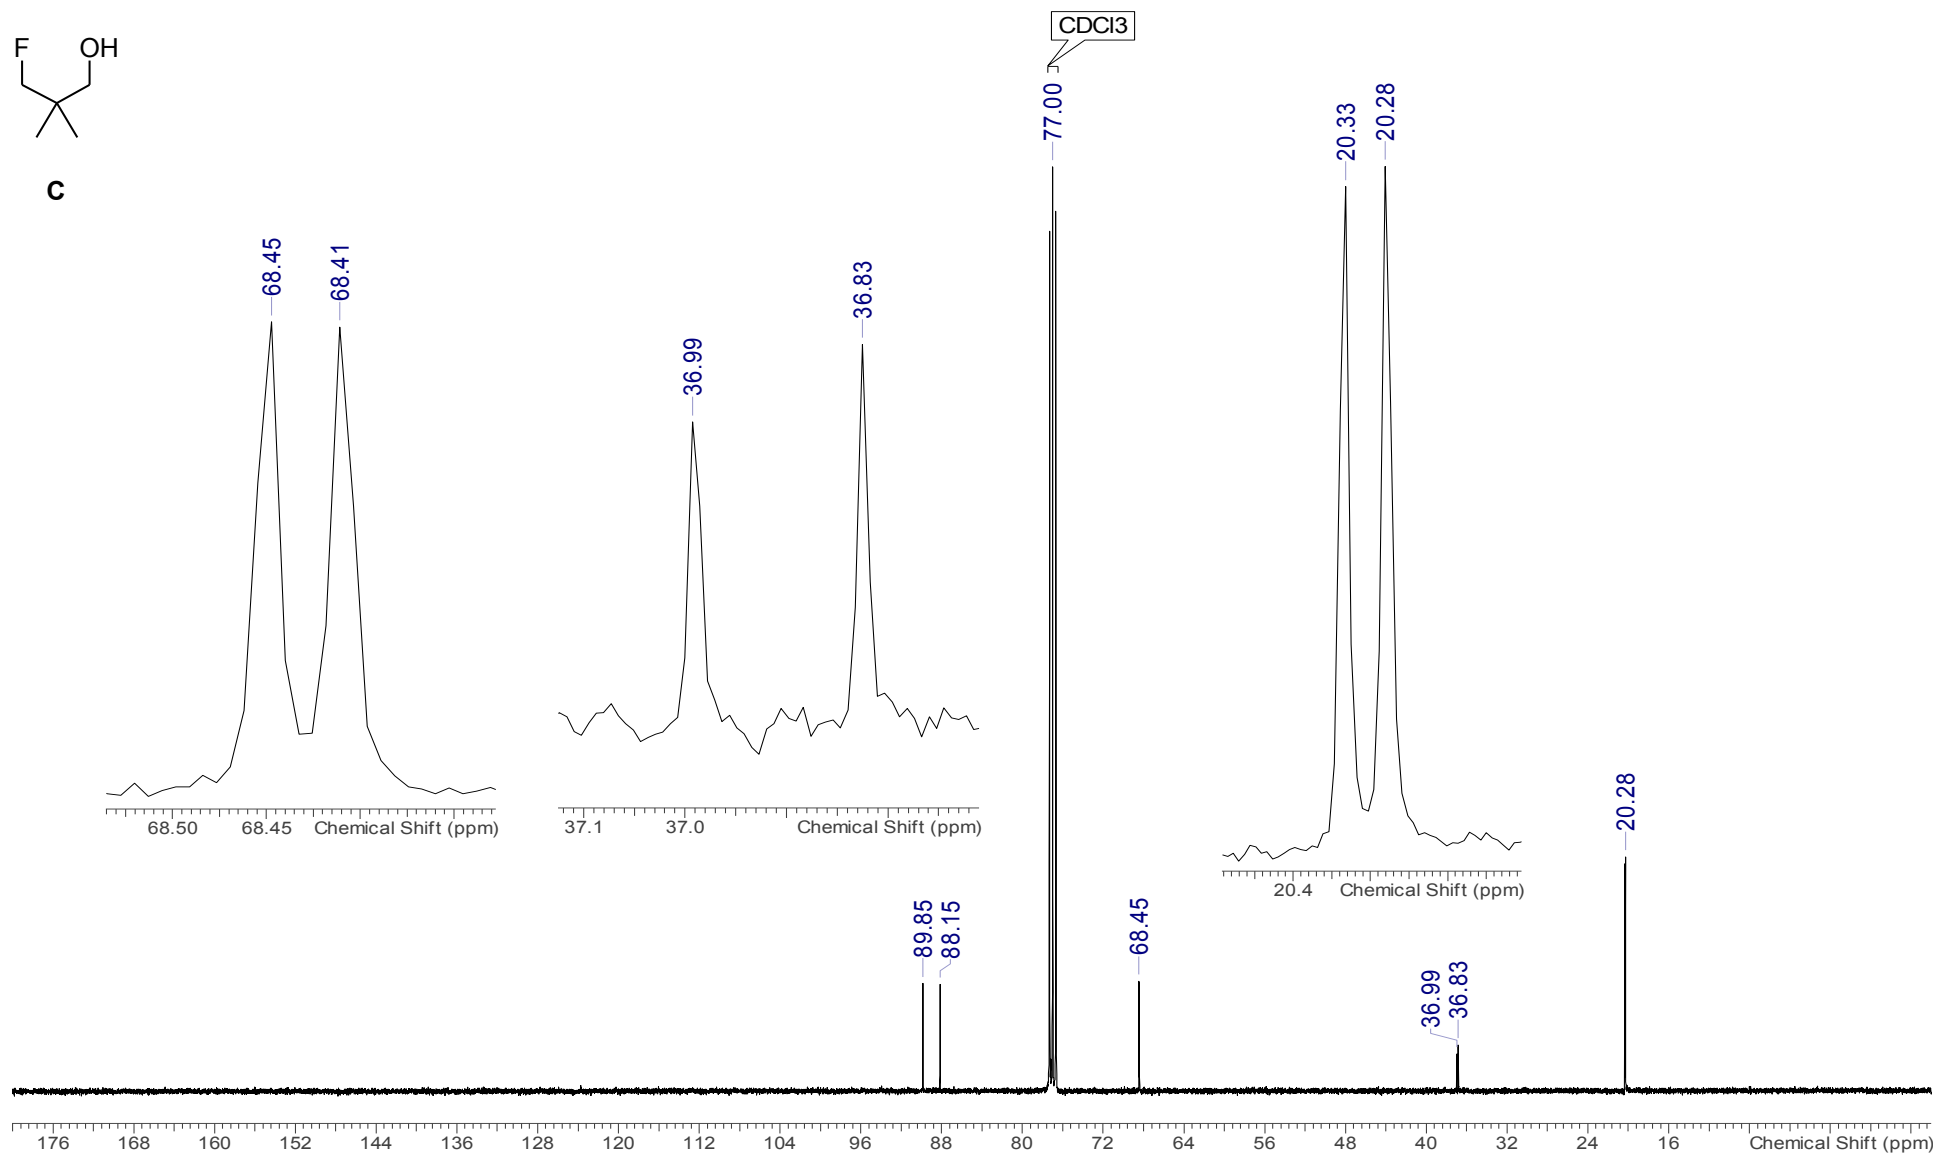

## 7.4 Synthesis of (±)-4,4-difluoropentan-2-ol (±)-E

### 7.4.1 4,6-Dimethyl-2-phenyl-1,3-dioxane *meso*-SI-7 and (±)-SI-8

$^1\text{H}$  NMR,  $\text{CDCl}_3$ , 400 MHz

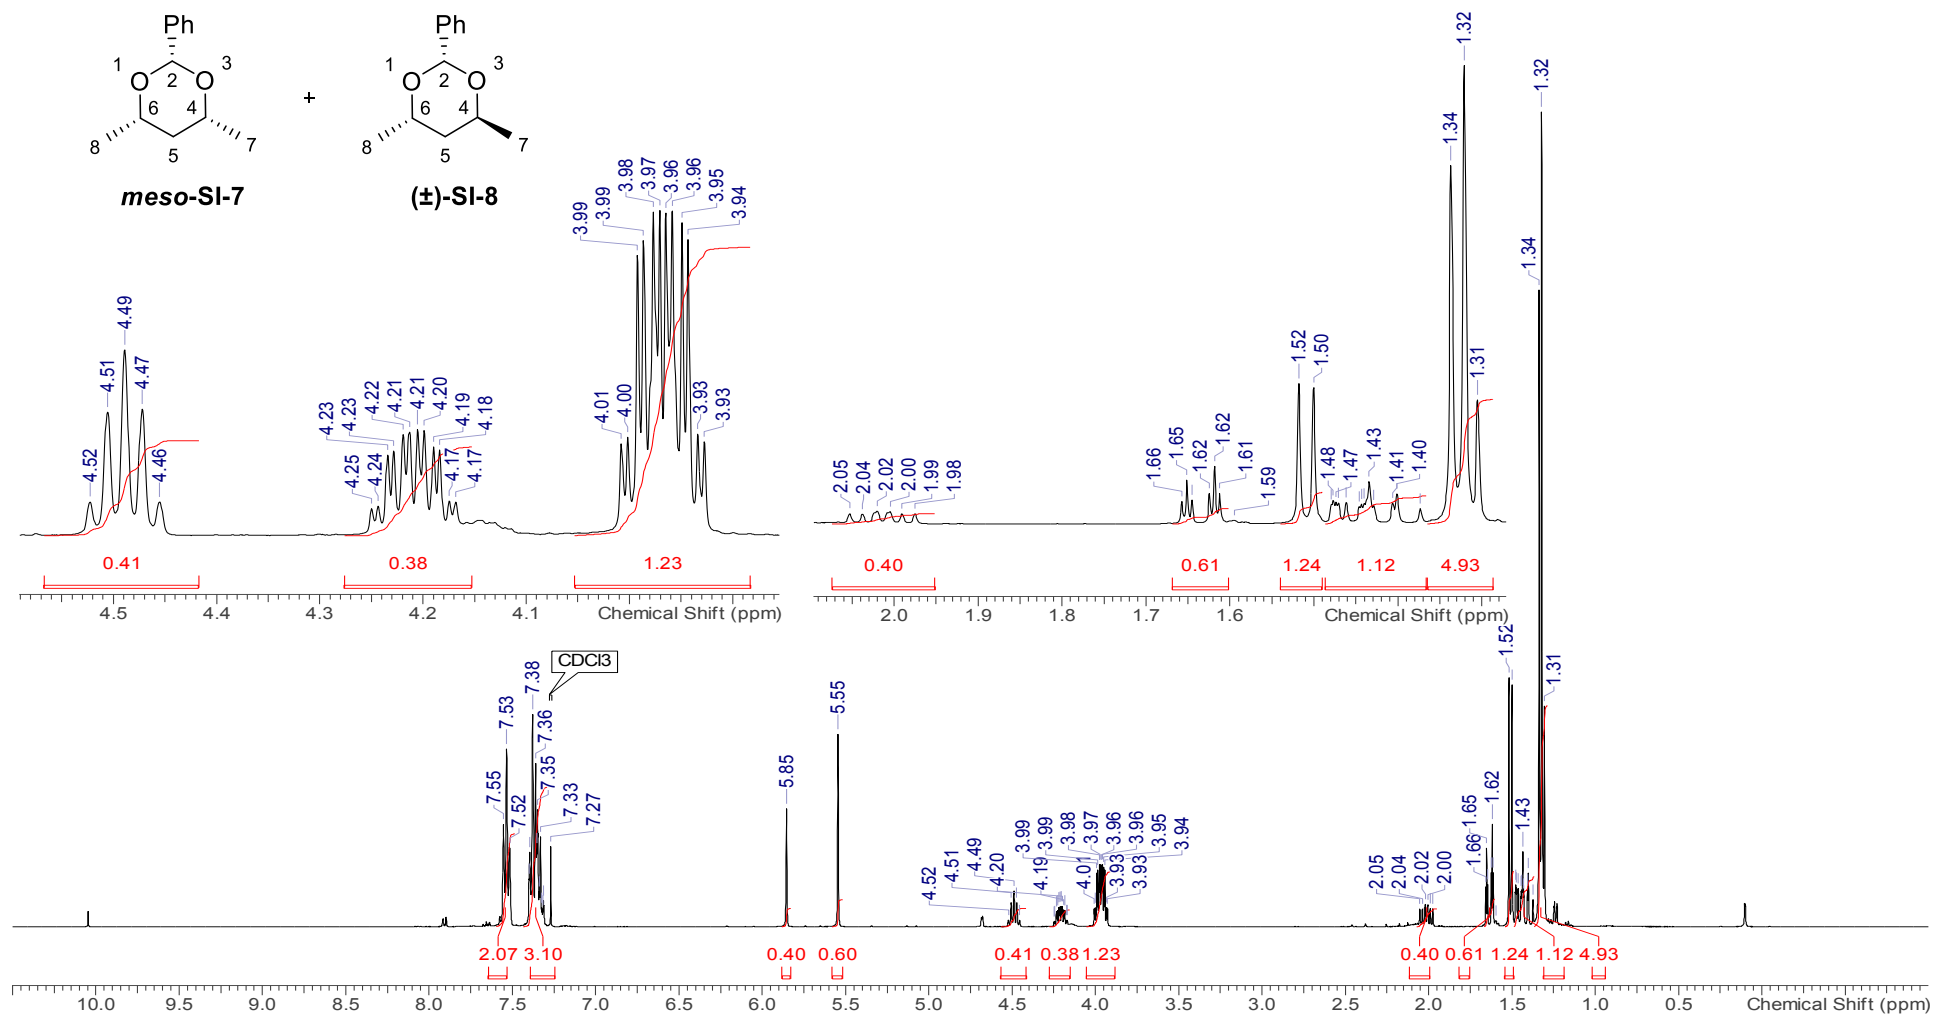

$^{13}\text{C}$  NMR,  $\text{CDCl}_3$ , 101 MHz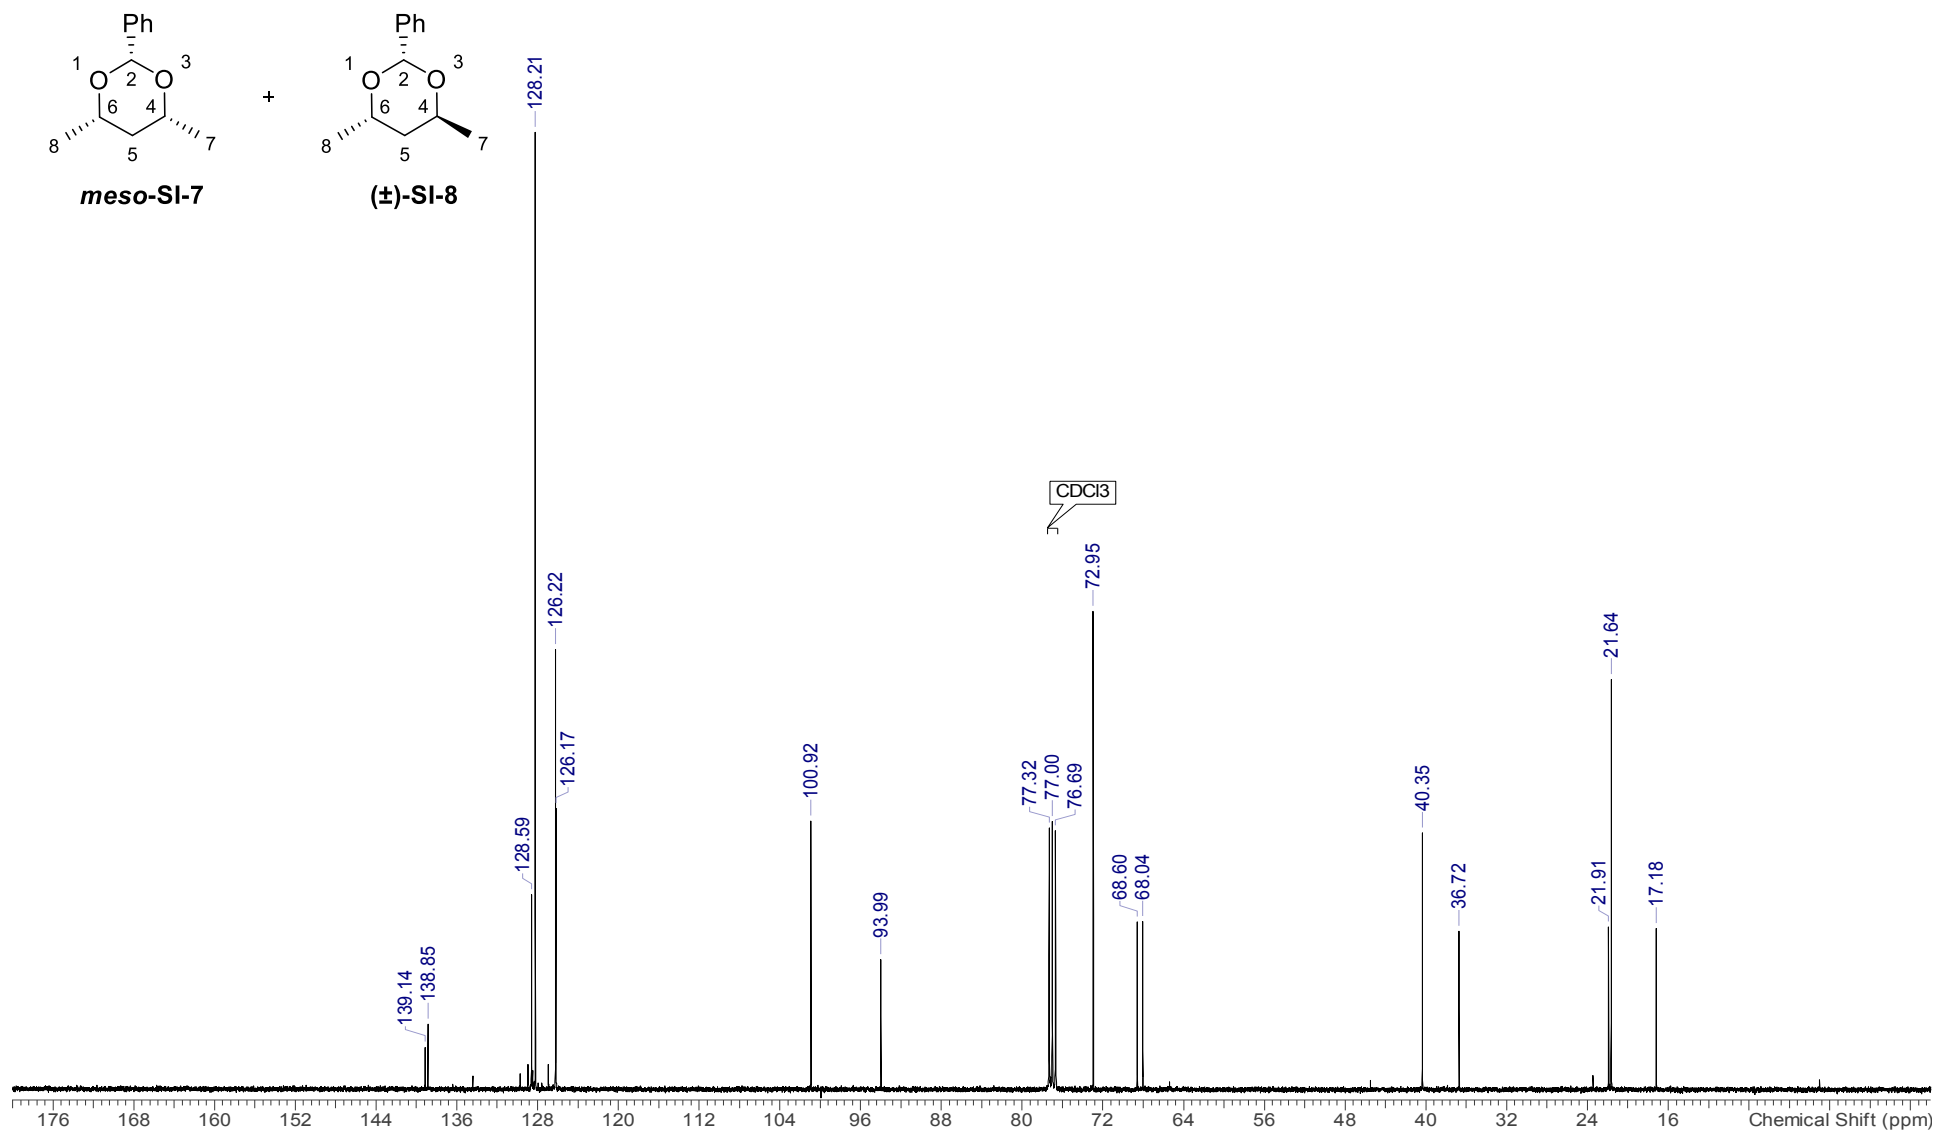

7.4.2 (2*S*\*,4*R*\*)-4-Benzyloxypentan-2-ol (±)-*syn*-SI-9 and (2*R*\*,4*R*\*)-4-benzyloxypentan-2-ol (±)-*anti*-SI-10<sup>1</sup>H NMR, CDCl<sub>3</sub>, 400 MHz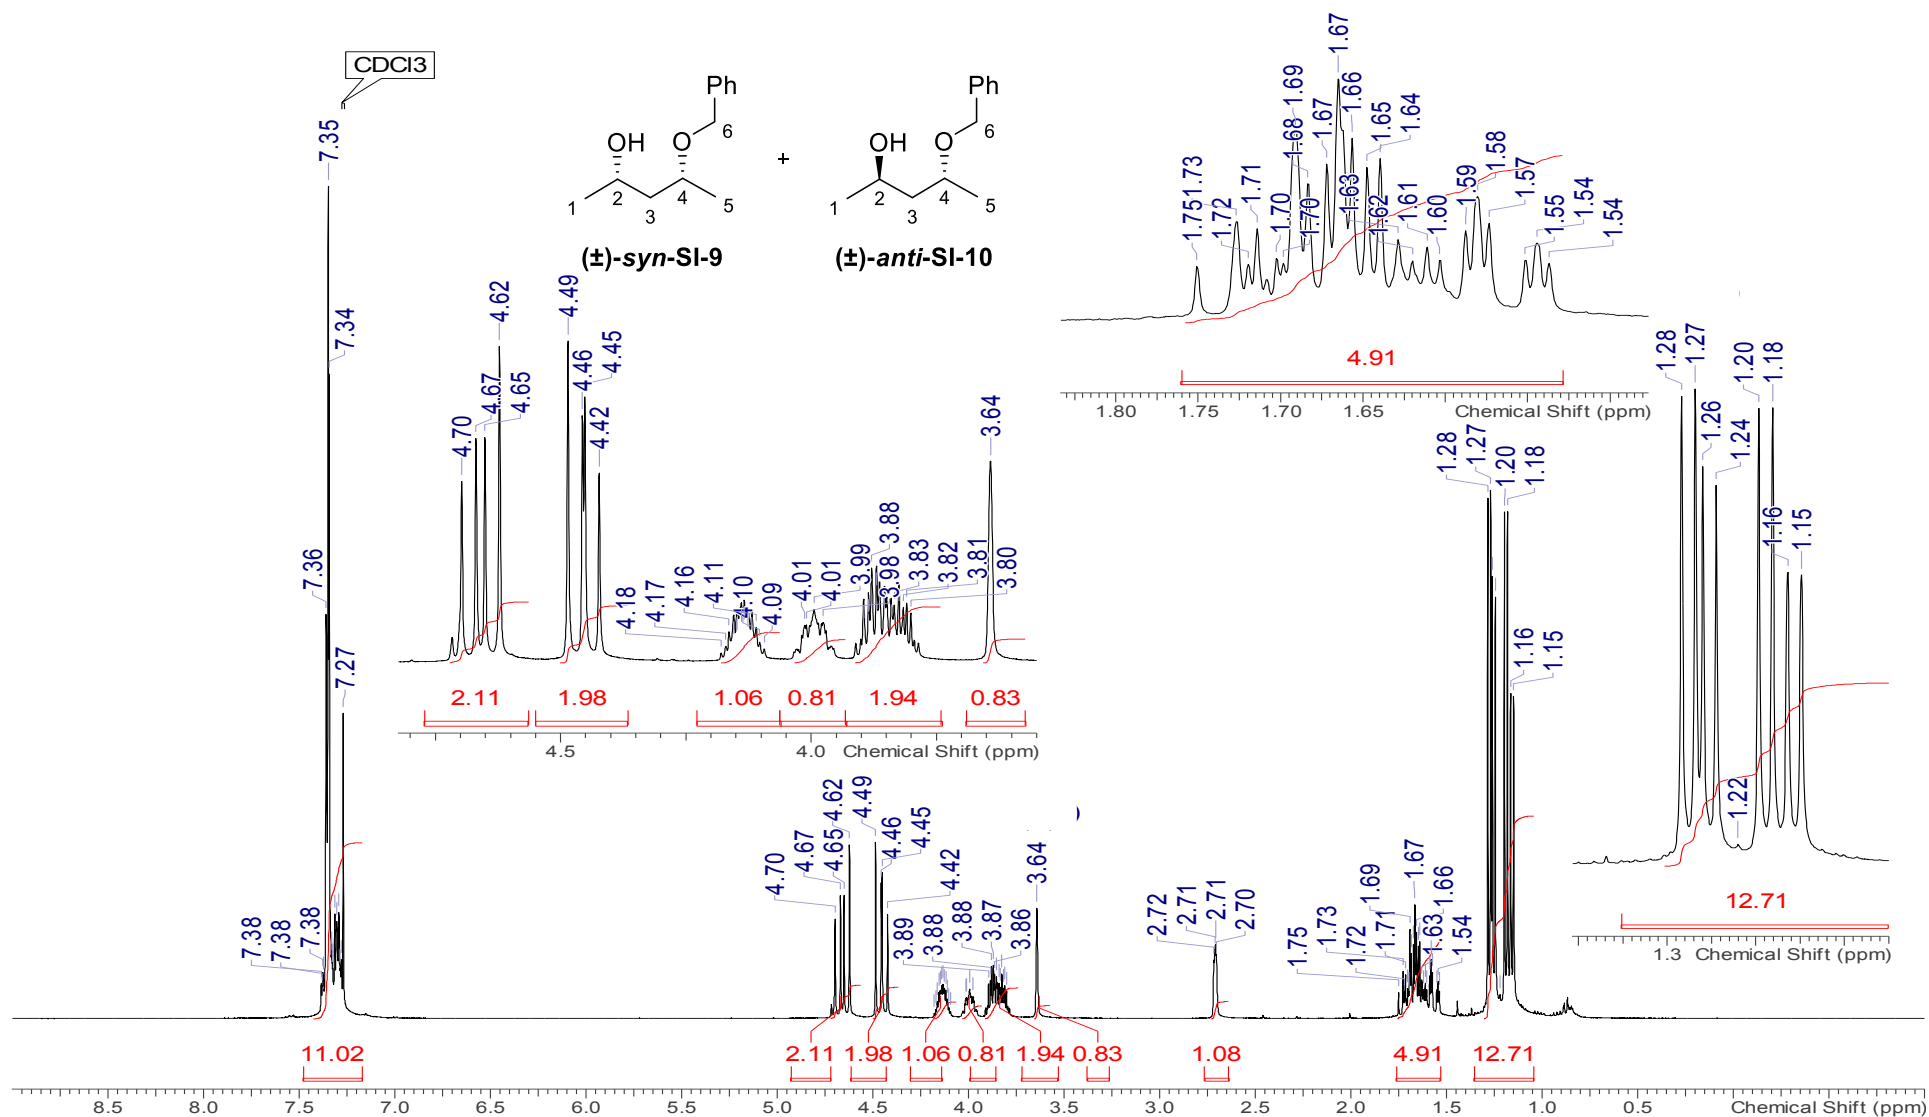

$^{13}\text{C}$  NMR,  $\text{CDCl}_3$ , 101 MHz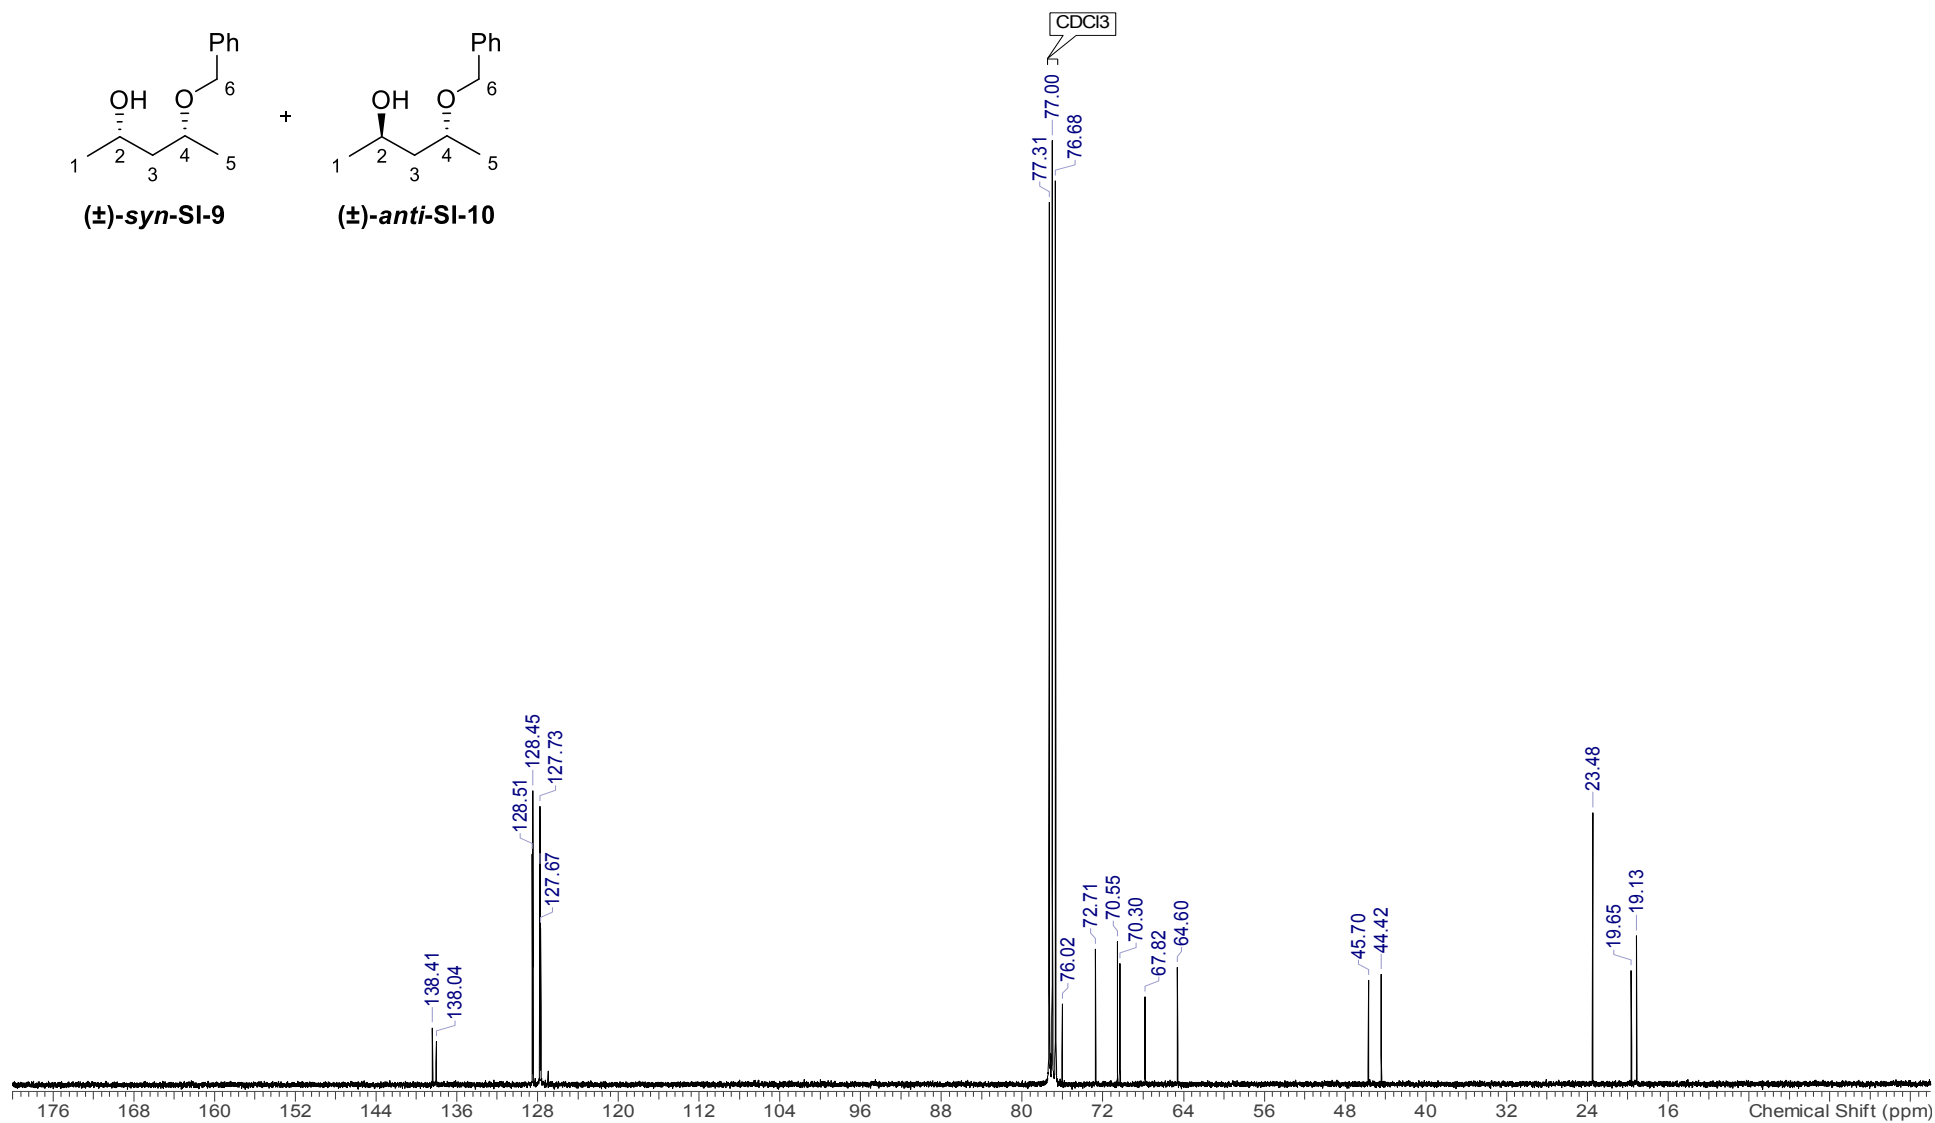

## 7.4.3 (±)-4-Benzyloxypentan-2-one (±)-SI-11

 $^1\text{H}$  NMR,  $\text{CDCl}_3$ , 400 MHz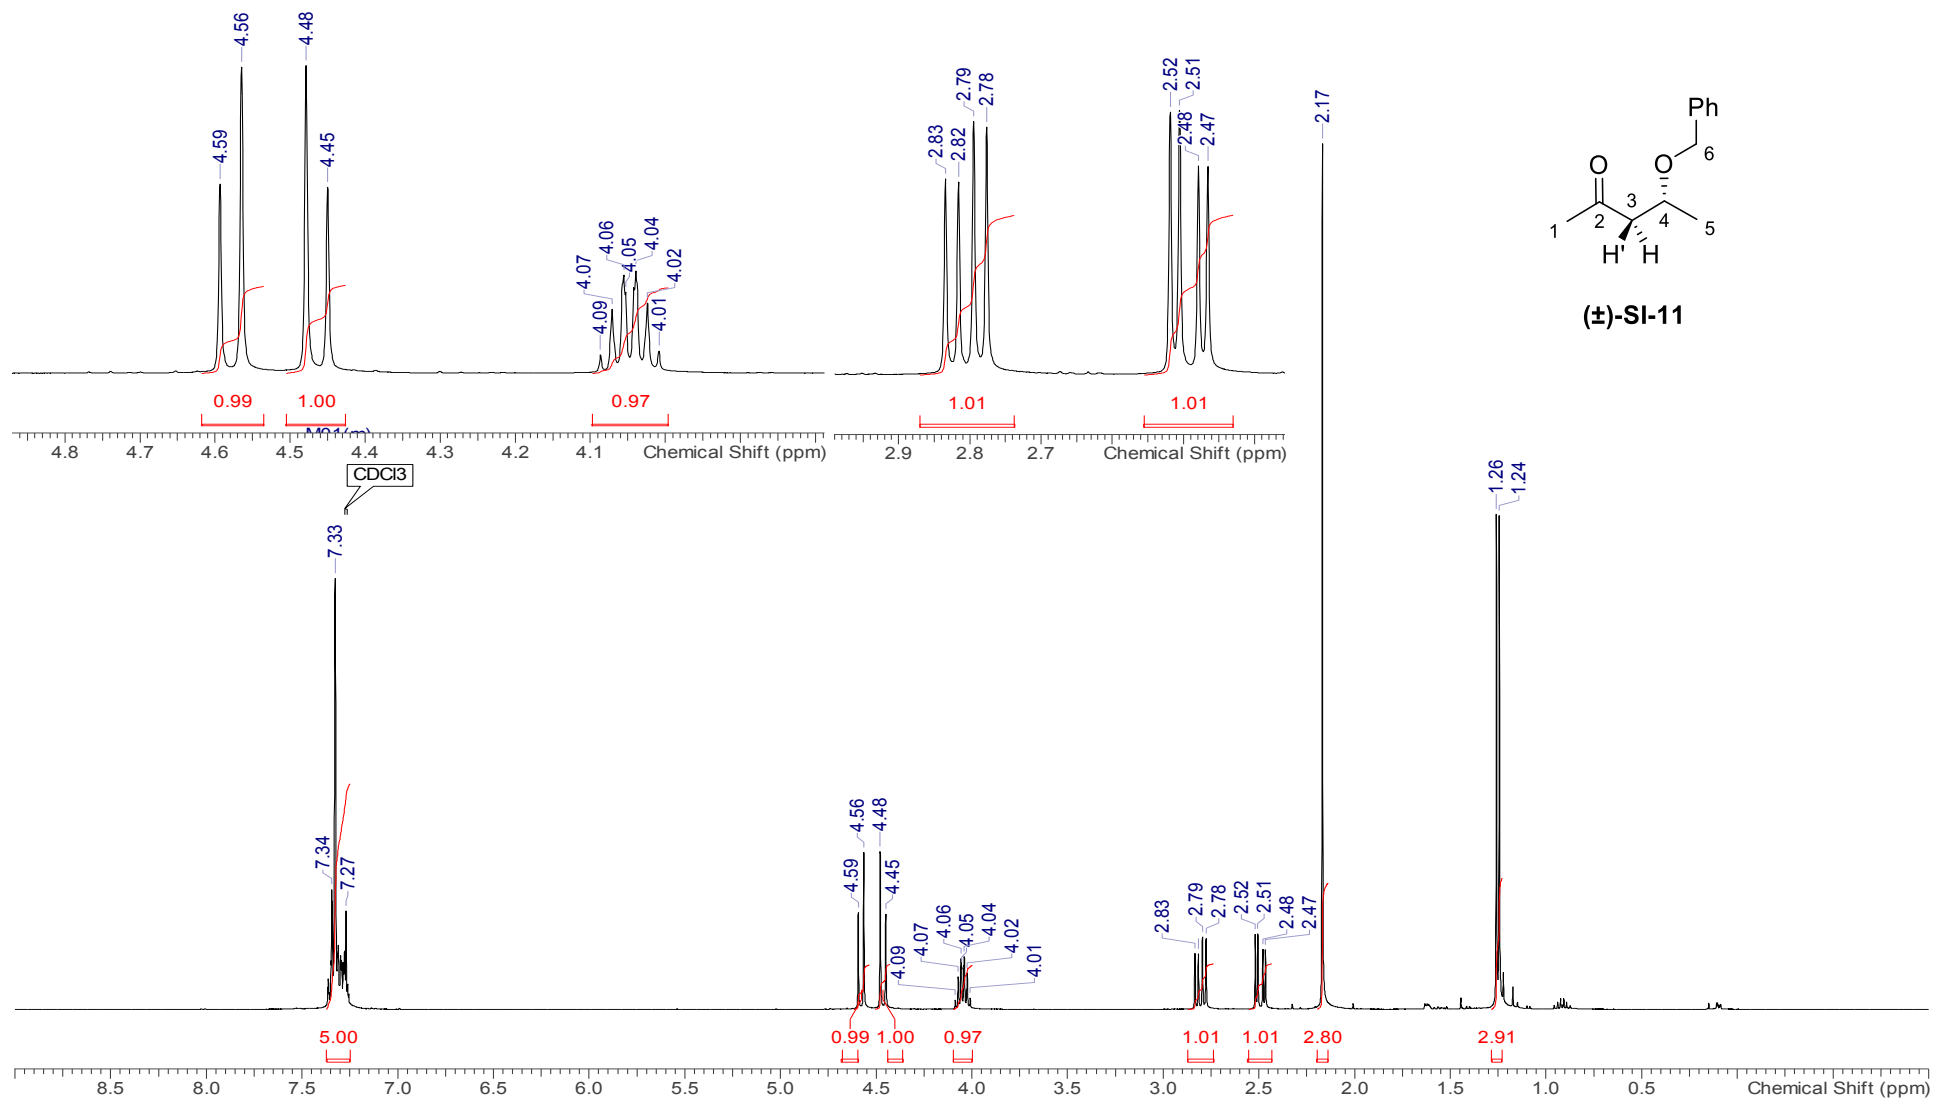

$^{13}\text{C}$  NMR,  $\text{CDCl}_3$ , 101 MHz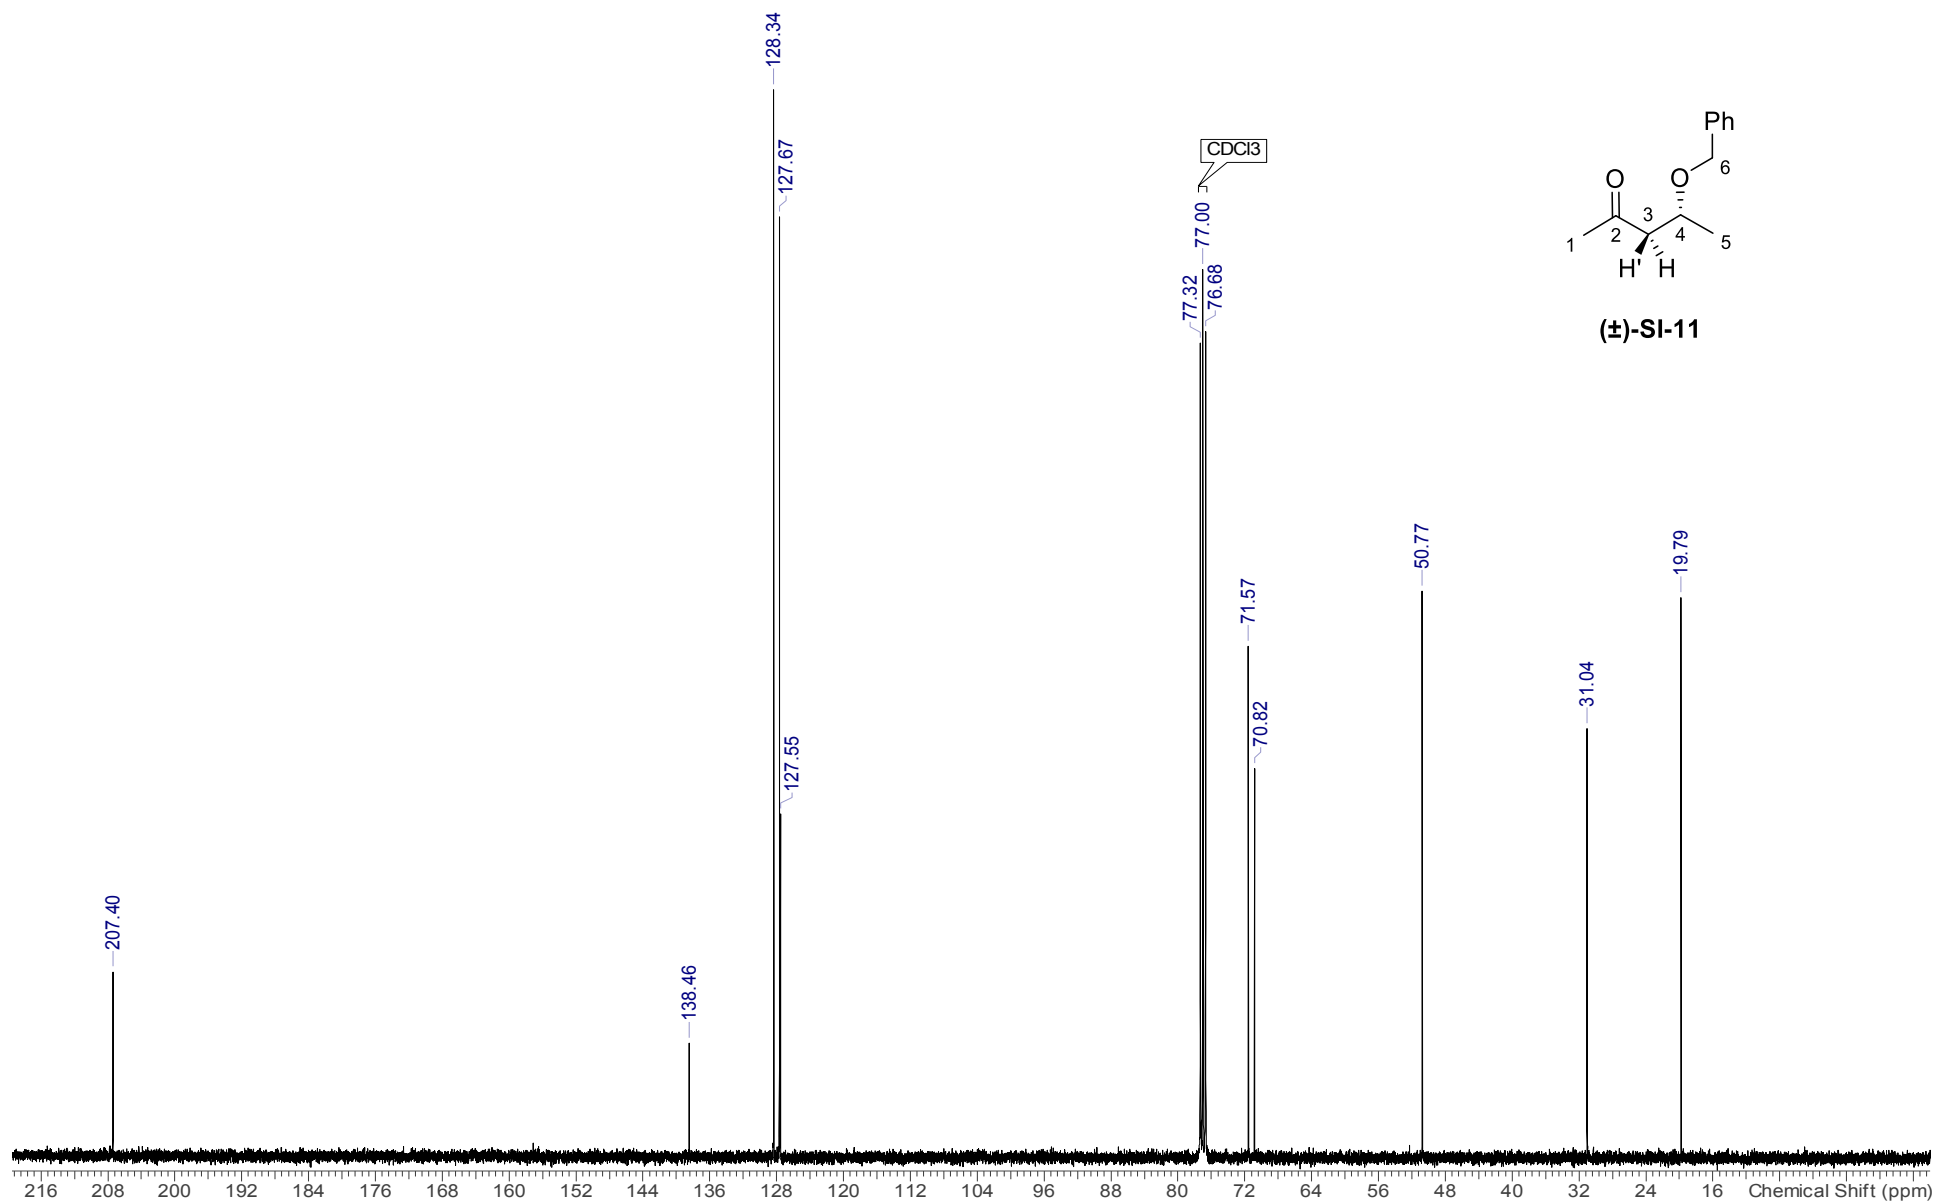



## 7.4.4 (±)-2-Benzyloxy-4,4-difluoropentane (±)-SI-12

 $^1\text{H}$  NMR,  $\text{CDCl}_3$ , 400 MHz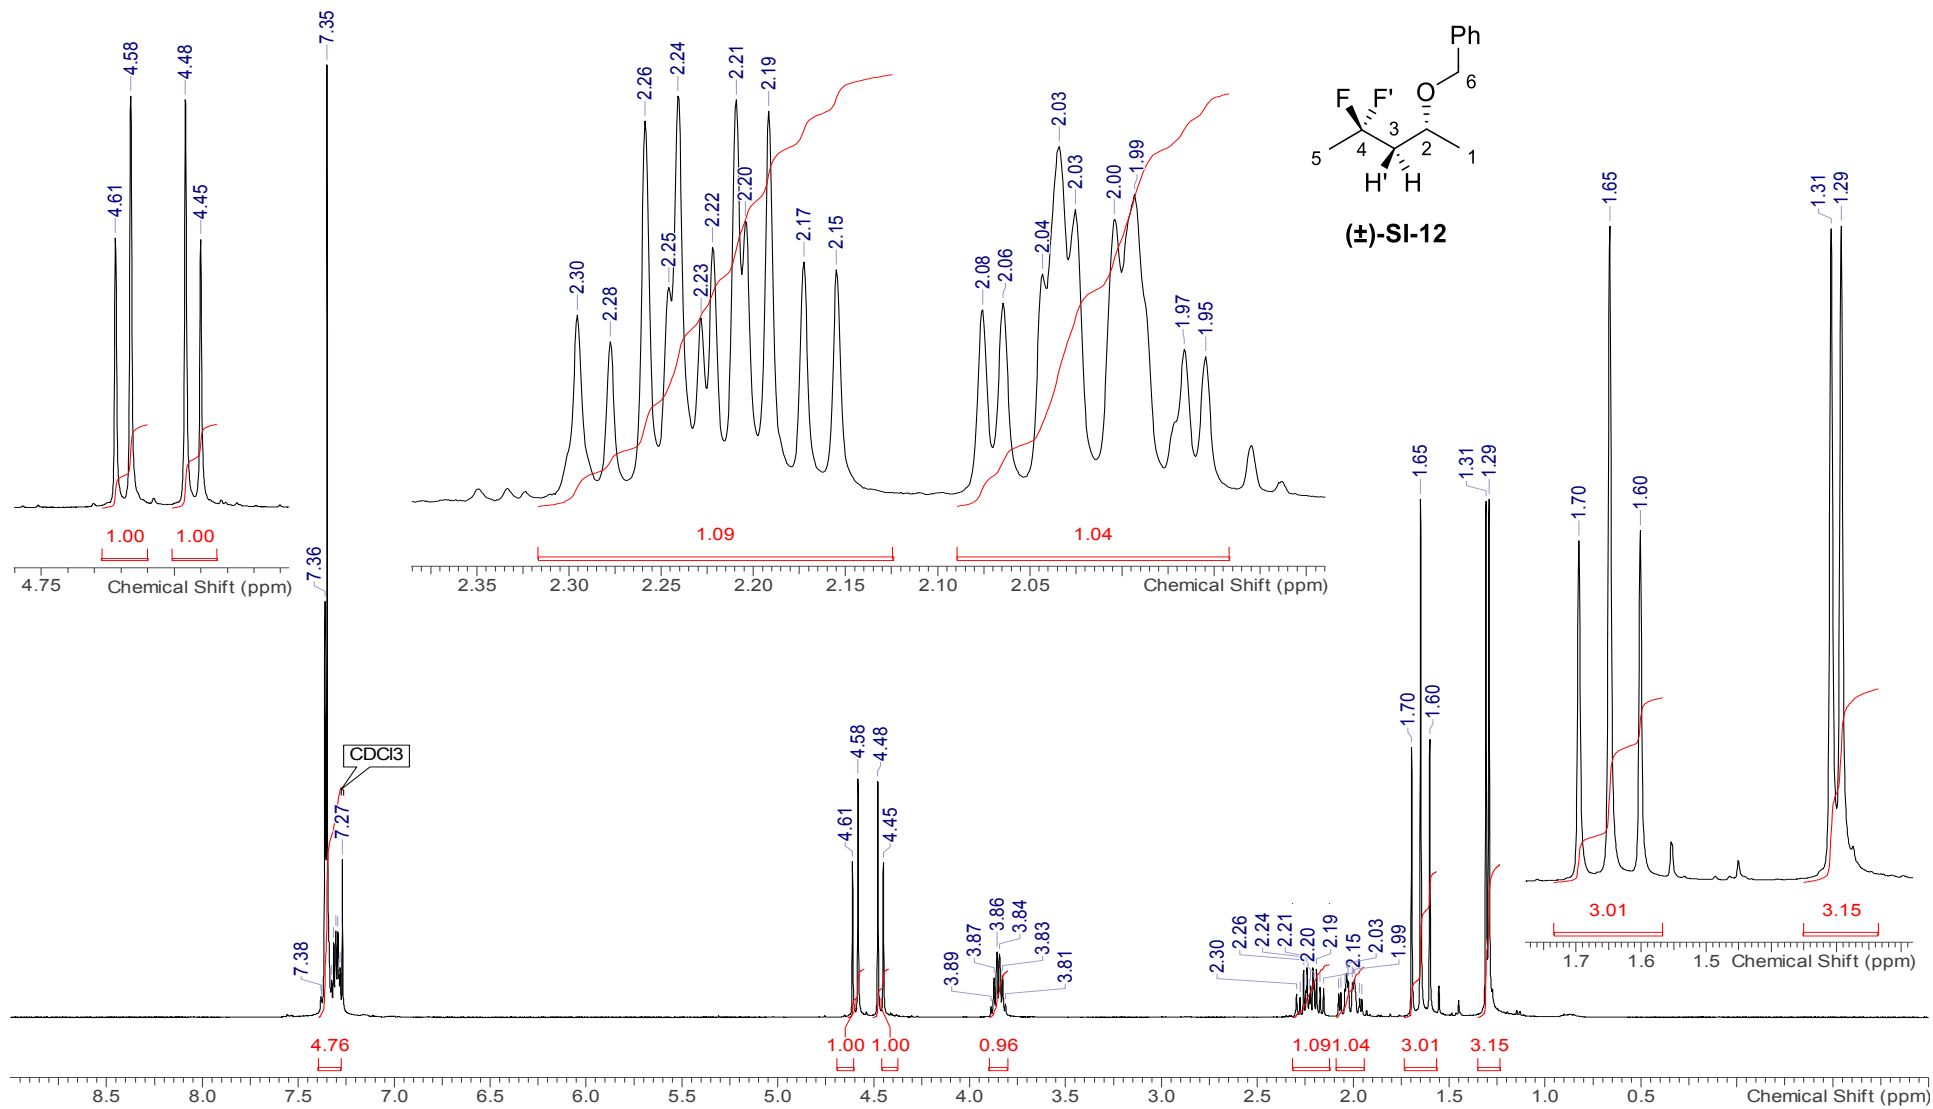

$^{13}\text{C}$  NMR,  $\text{CDCl}_3$ , 101 MHz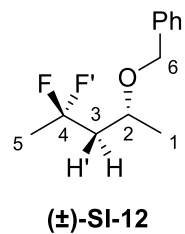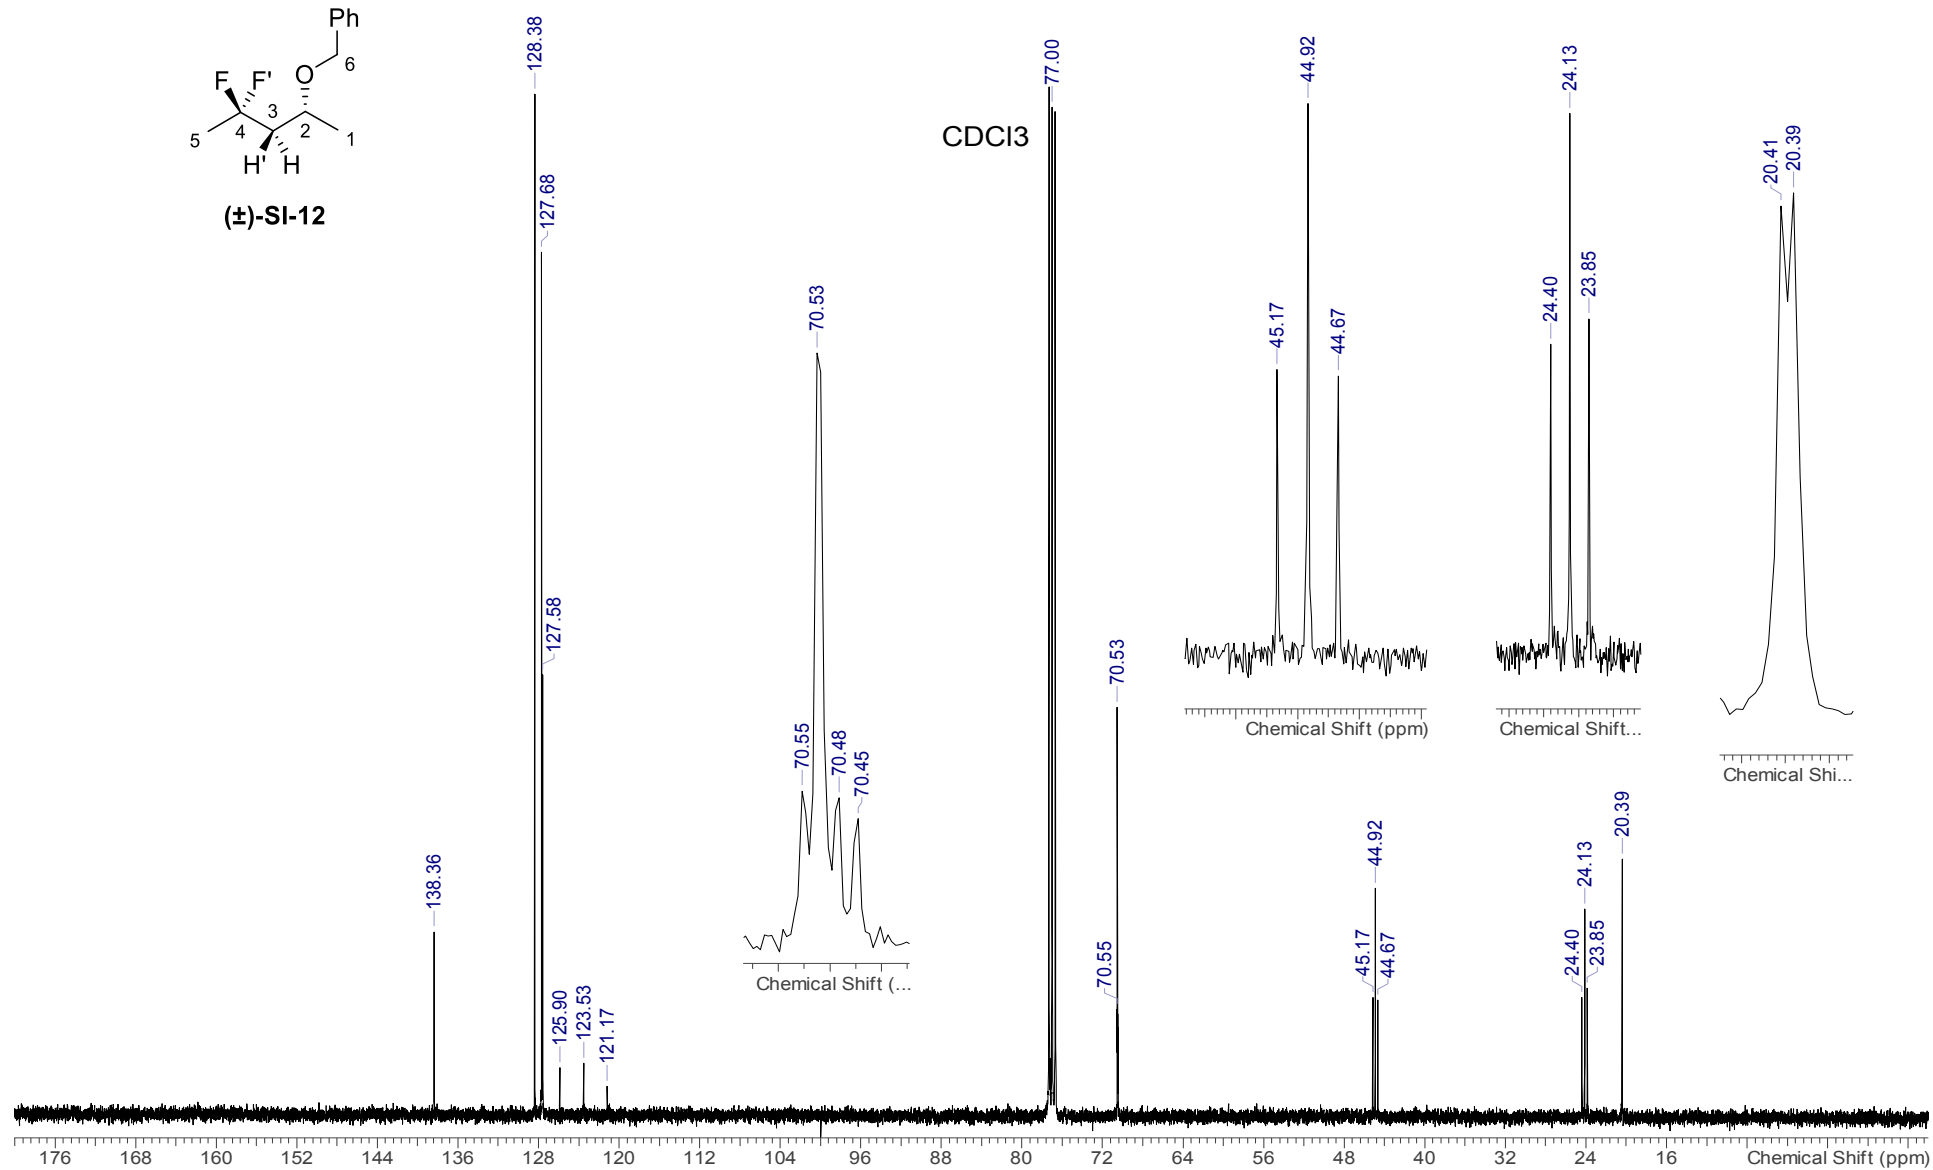

$^{19}\text{F}$ ,  $\text{CDCl}_3$ , 376 MHz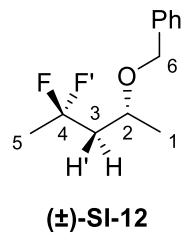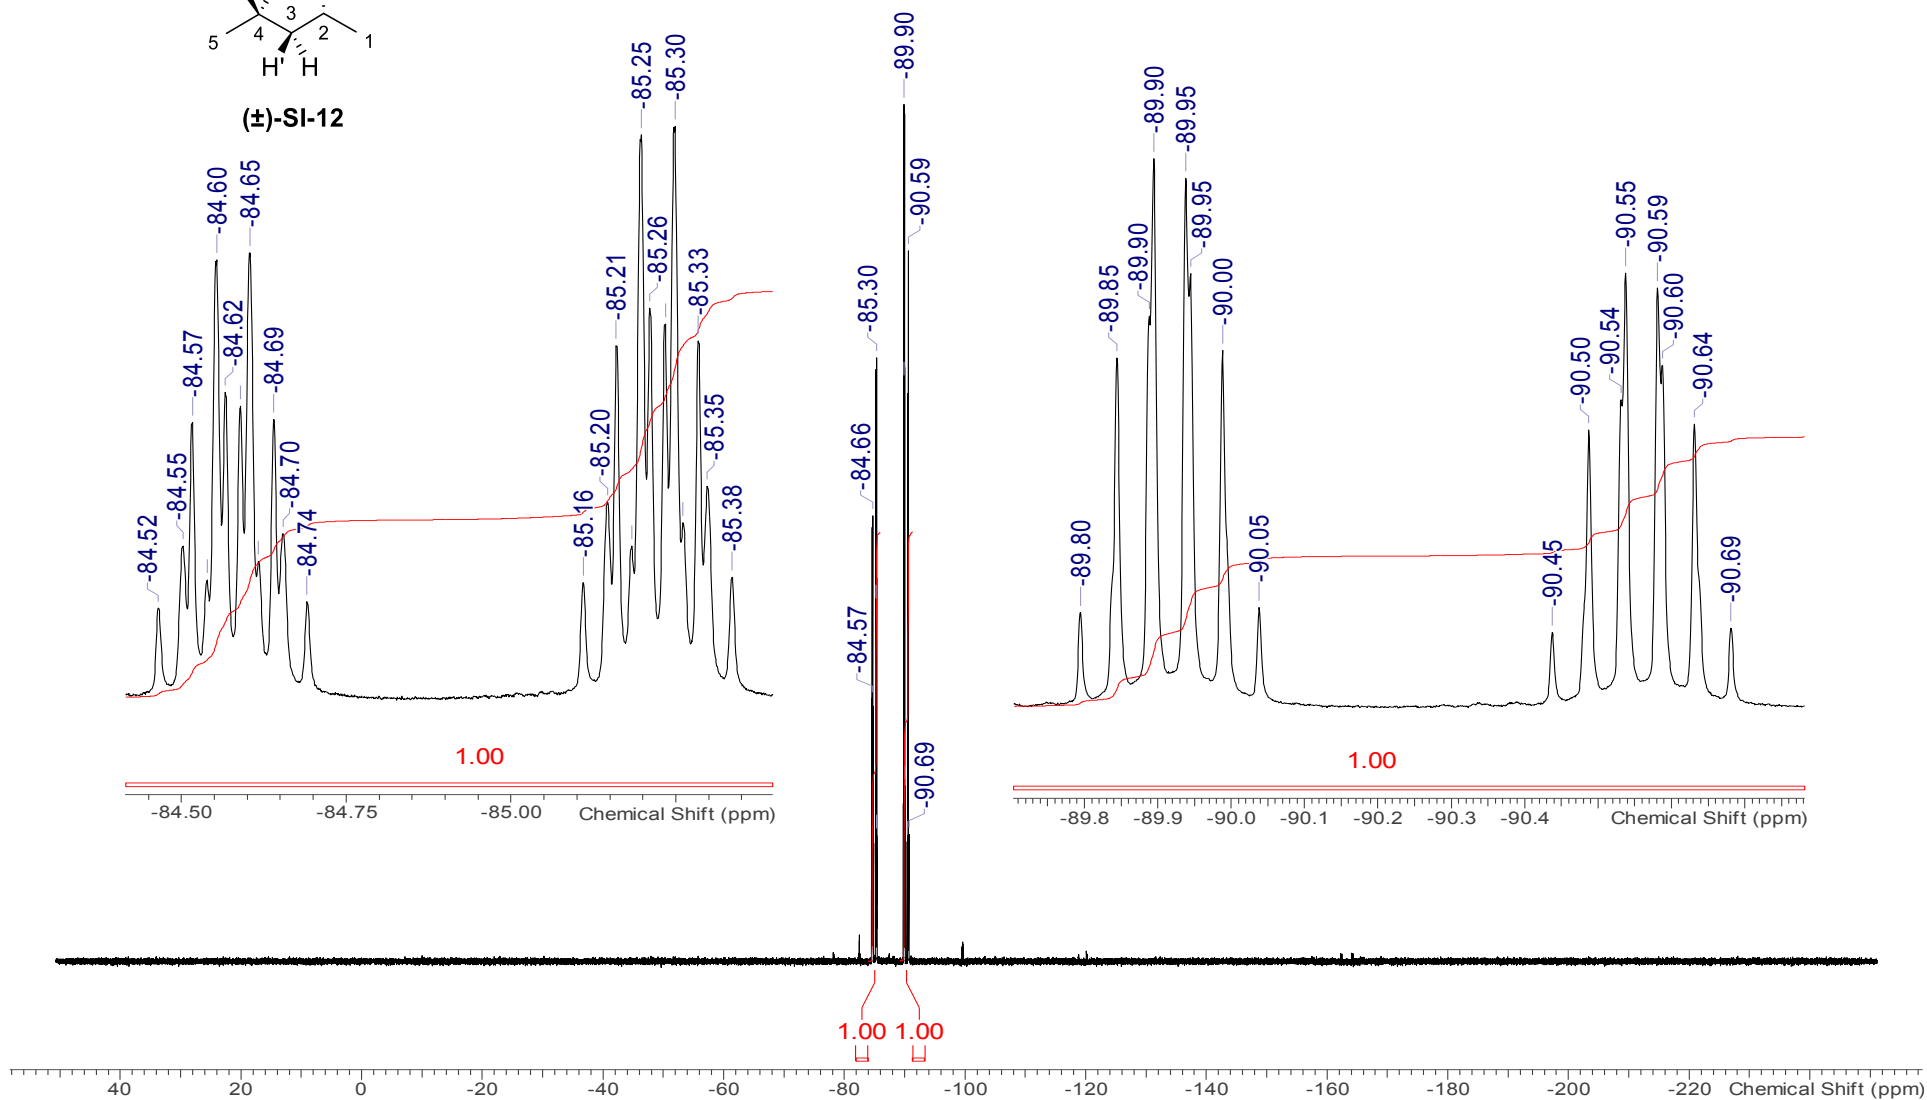

## 7.4.5 (±)-4,4-difluoropentan-2-ol (±)-E

<sup>13</sup>C NMR, CDCl<sub>3</sub>, 101 MHz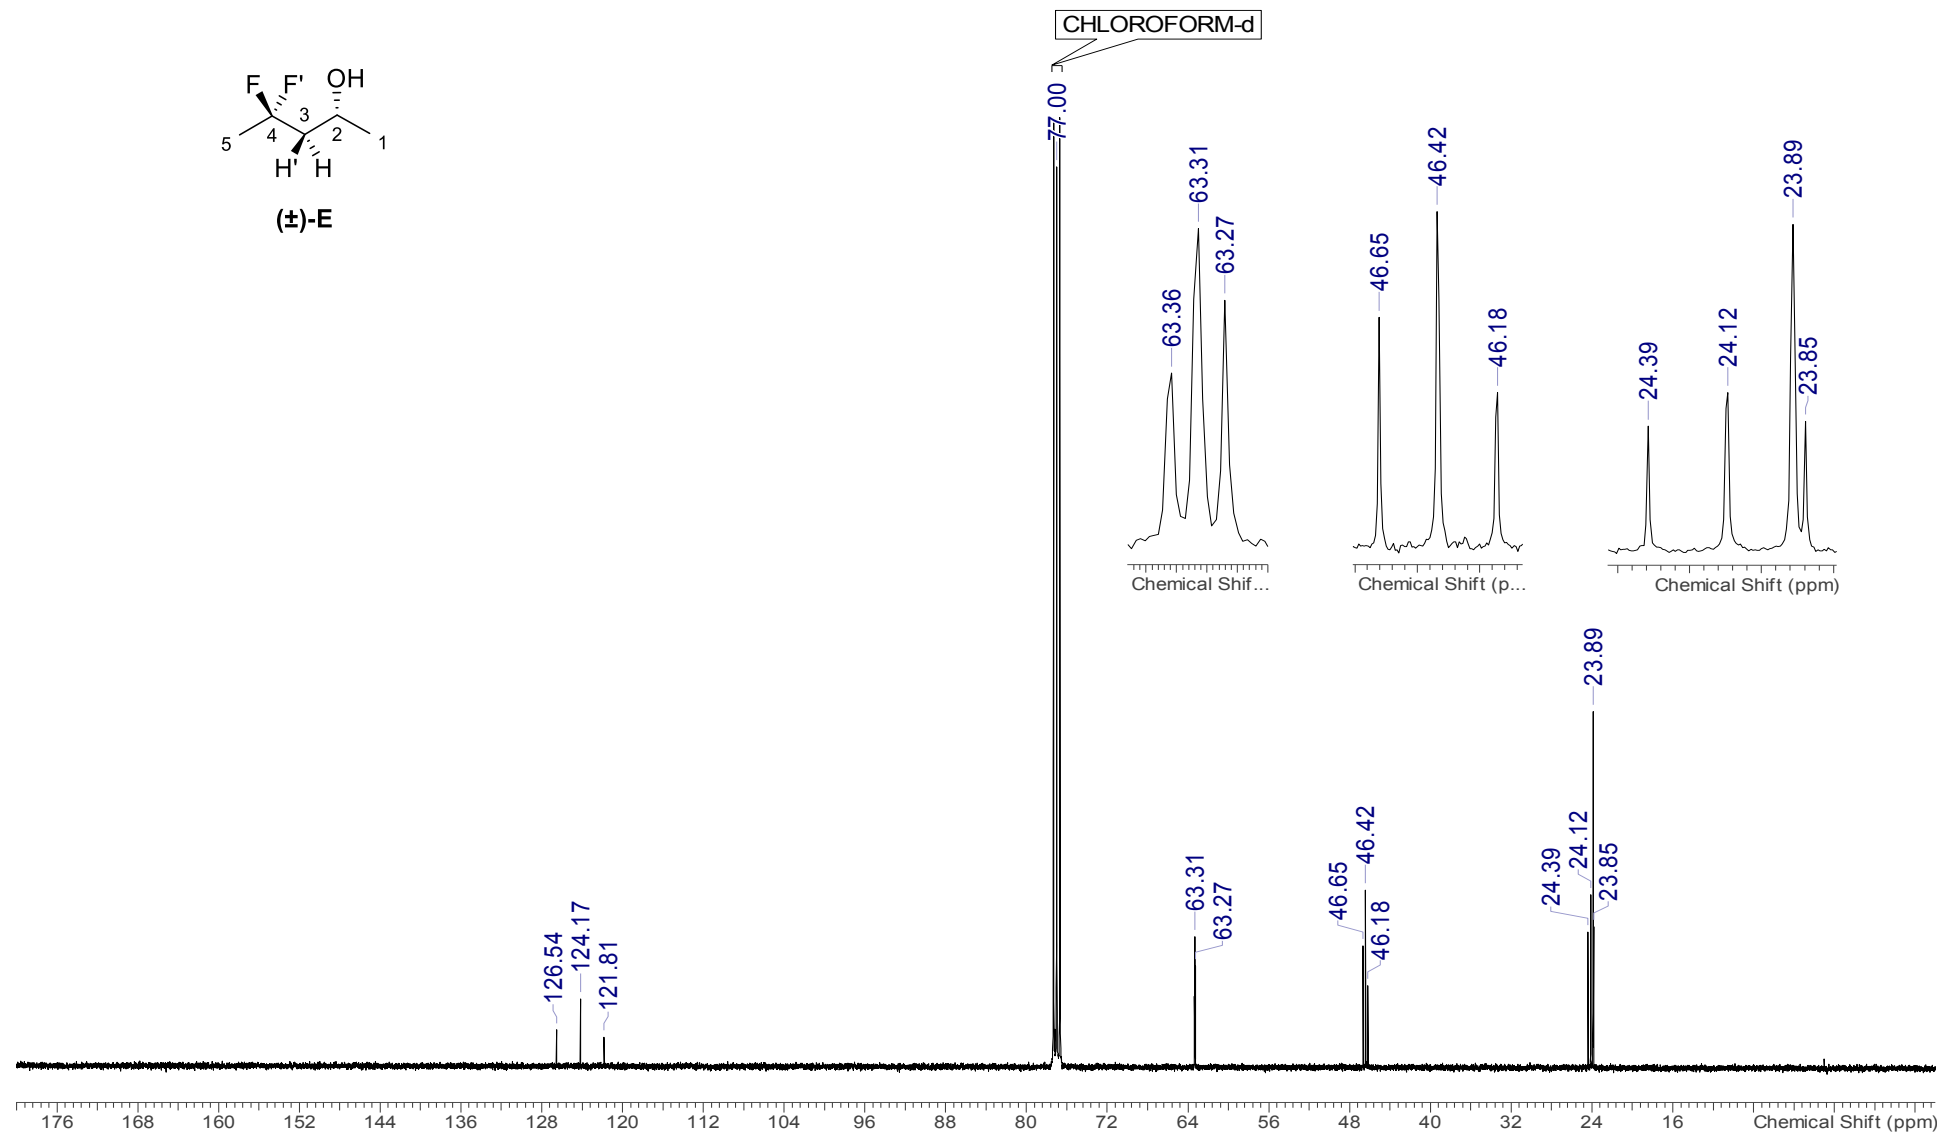

## 7.5 Synthesis of (±)-4,4-difluorobutan-2-ol (±)-F

## 7.5.1 (±)-3-Benzyloxy-butanal (±)-SI-15

 $^1\text{H}$  NMR,  $\text{CDCl}_3$ , 400 MHz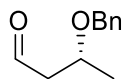

(±)-SI-15

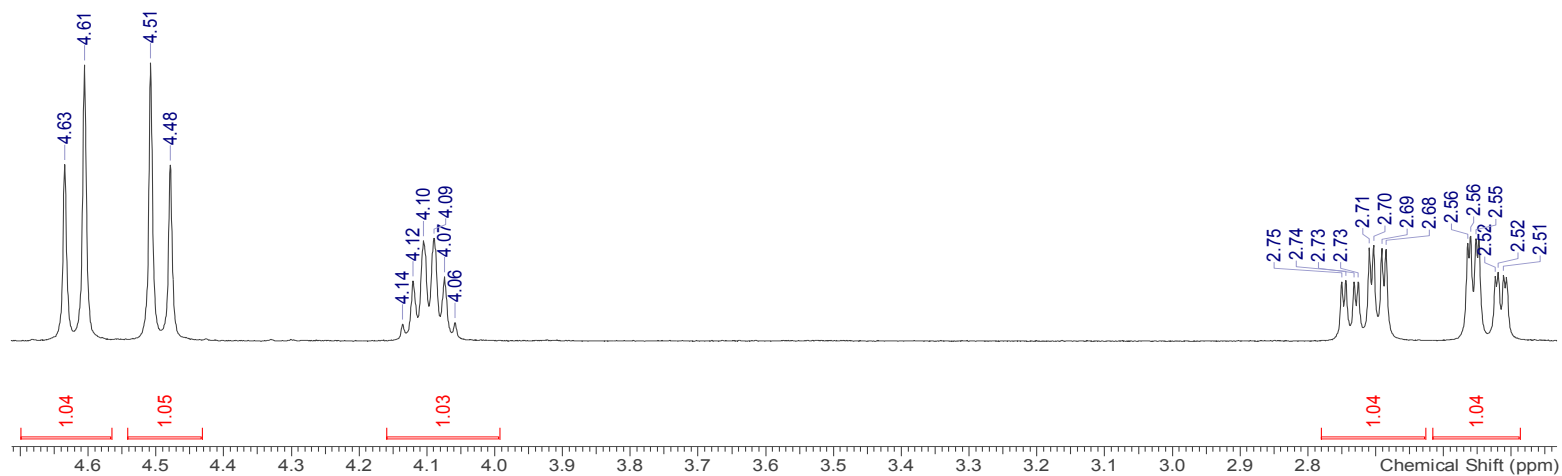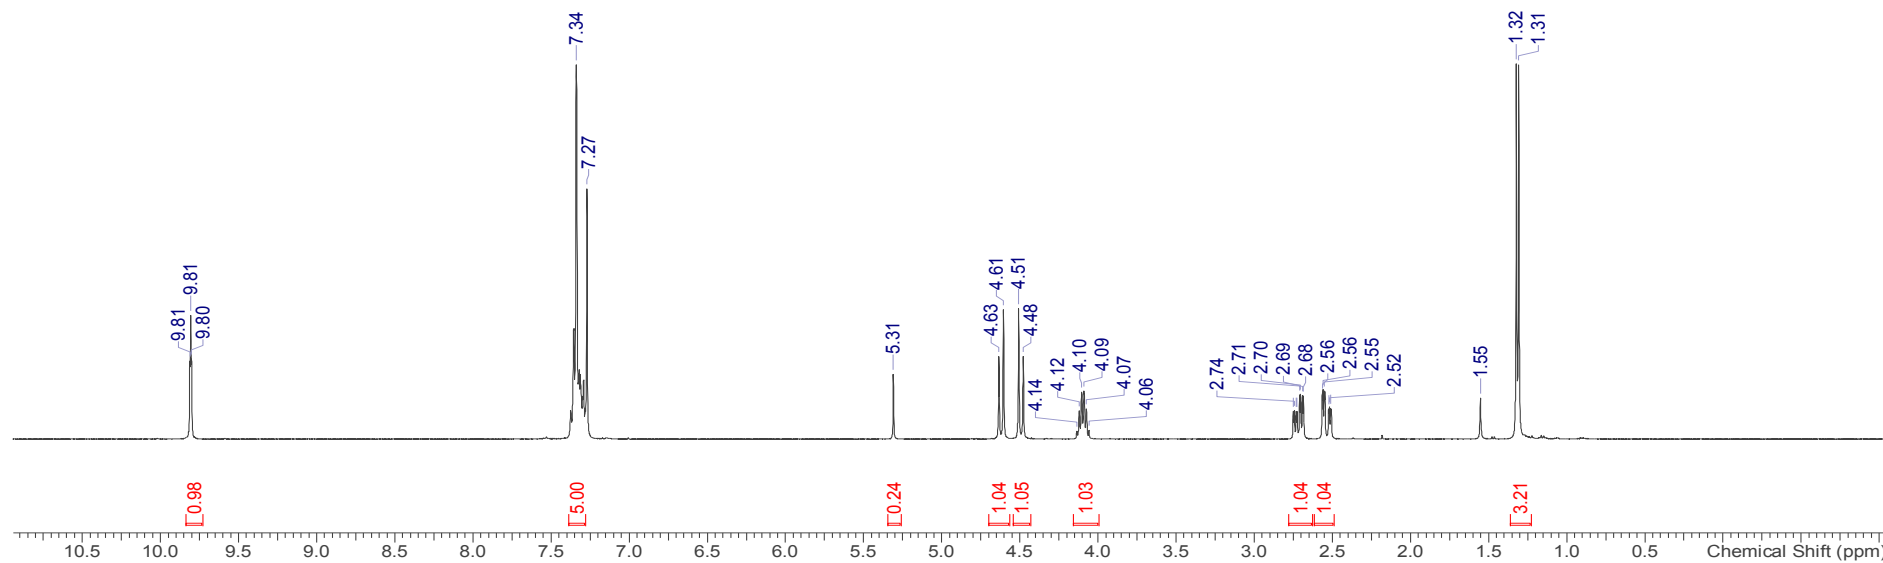

$^{13}\text{C}$  NMR,  $\text{CDCl}_3$ , 101 MHz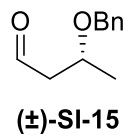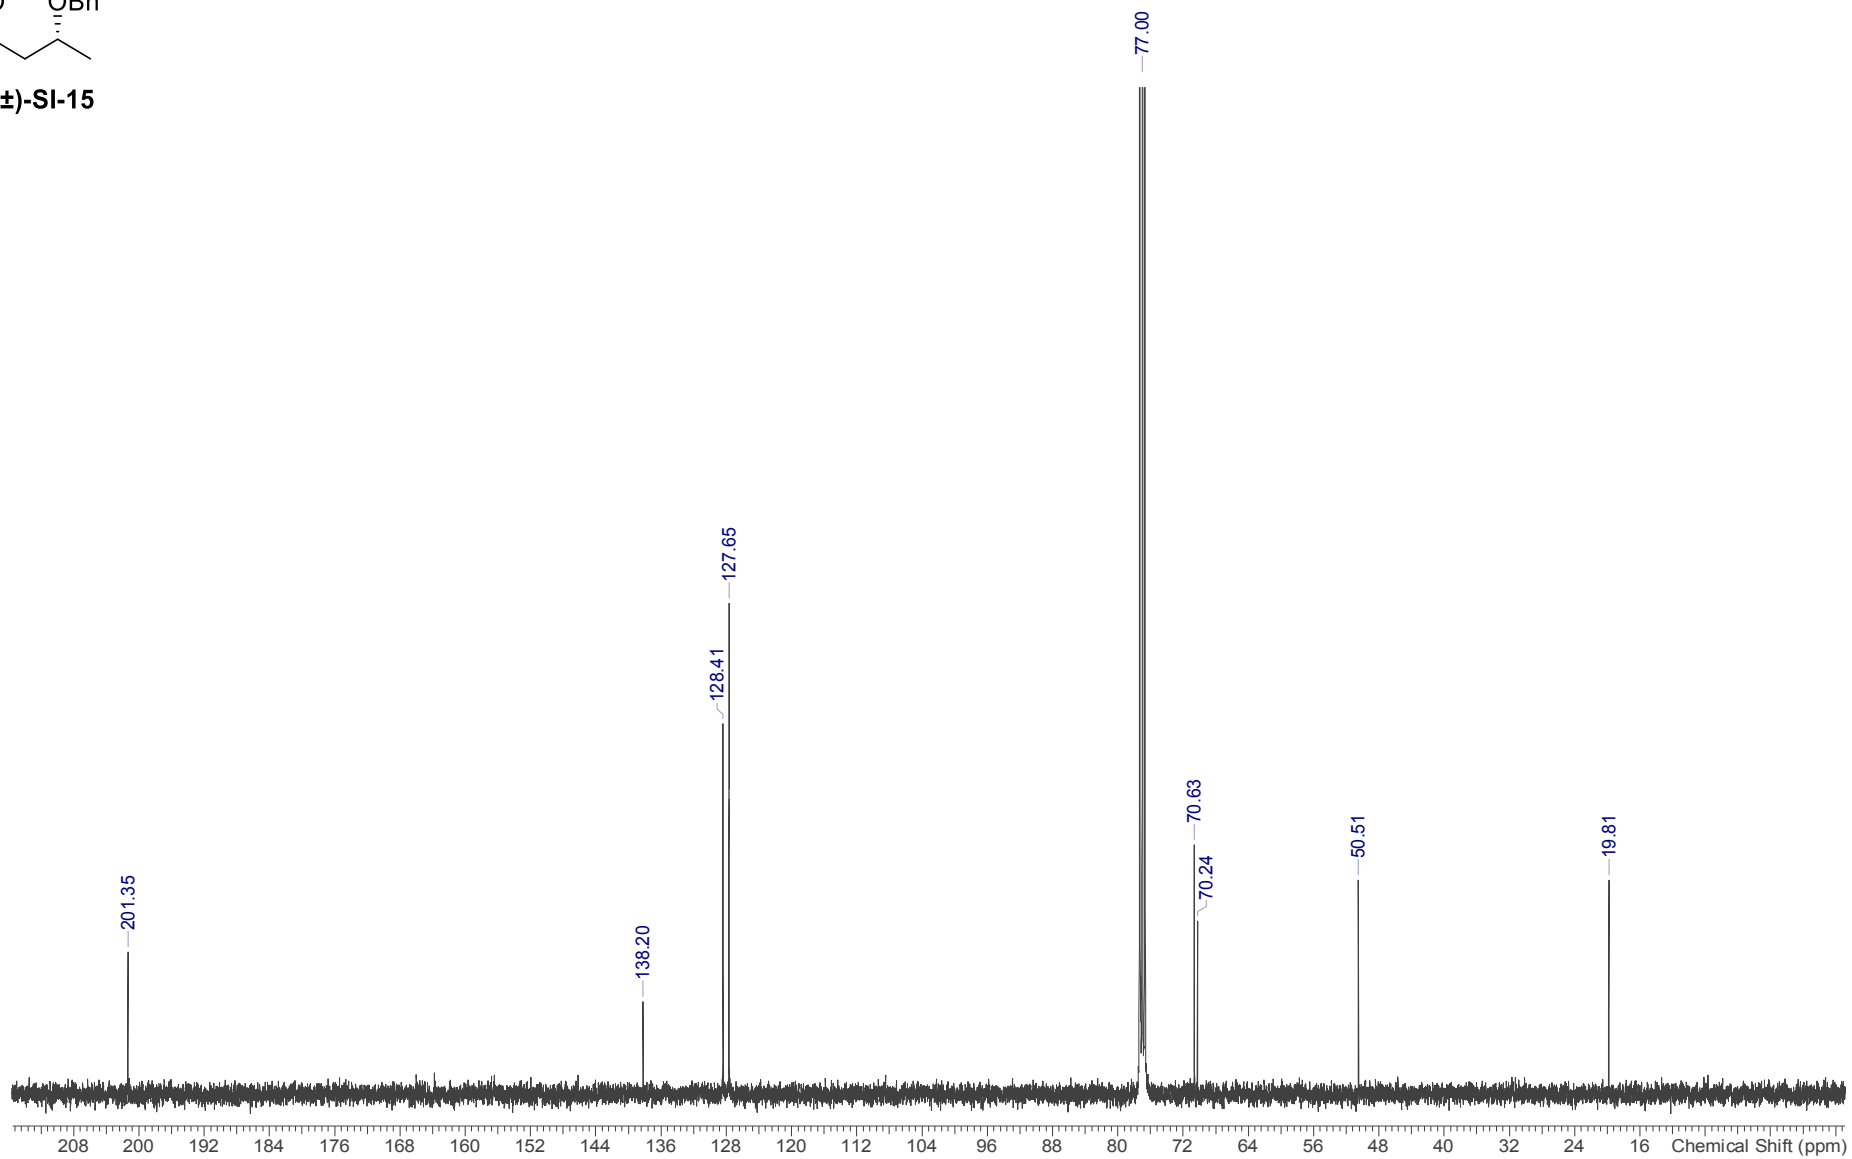

## 7.5.2 (±)-2-Benzyloxy-4,4-difluorobutane (±)-SI-16

 $^1\text{H}$  NMR,  $\text{CDCl}_3$ , 400 MHz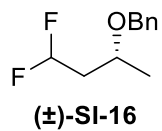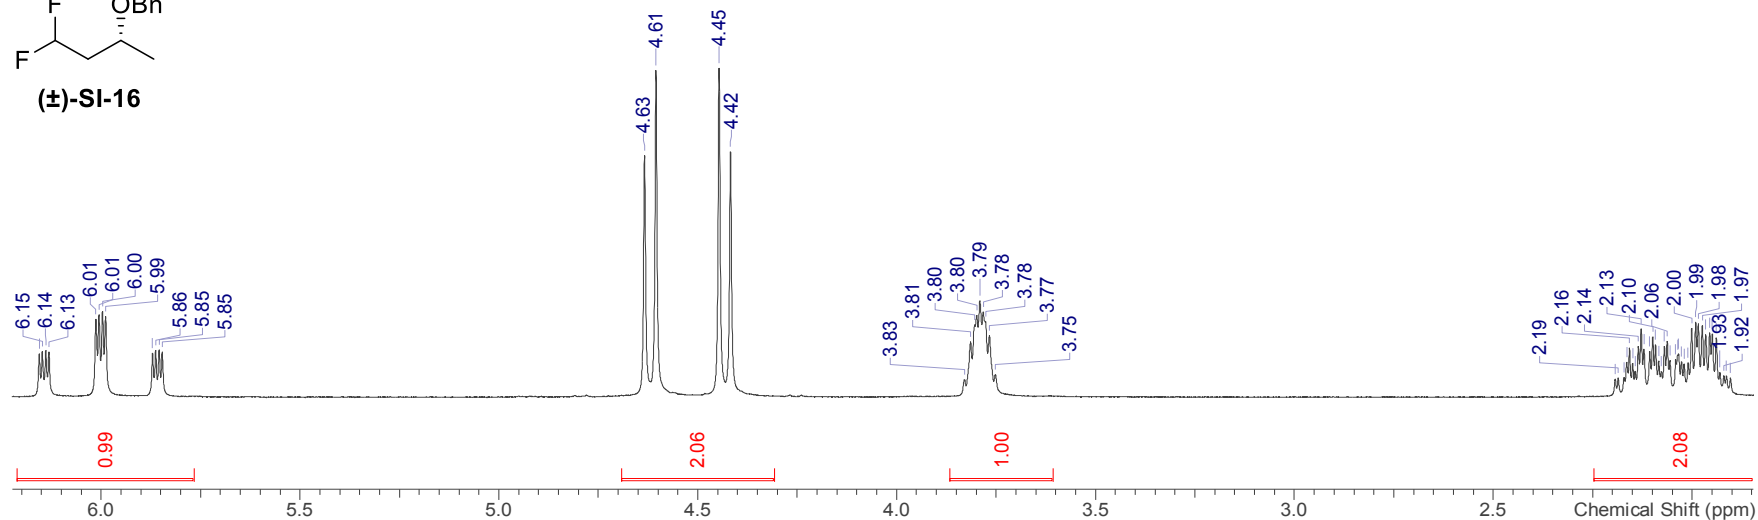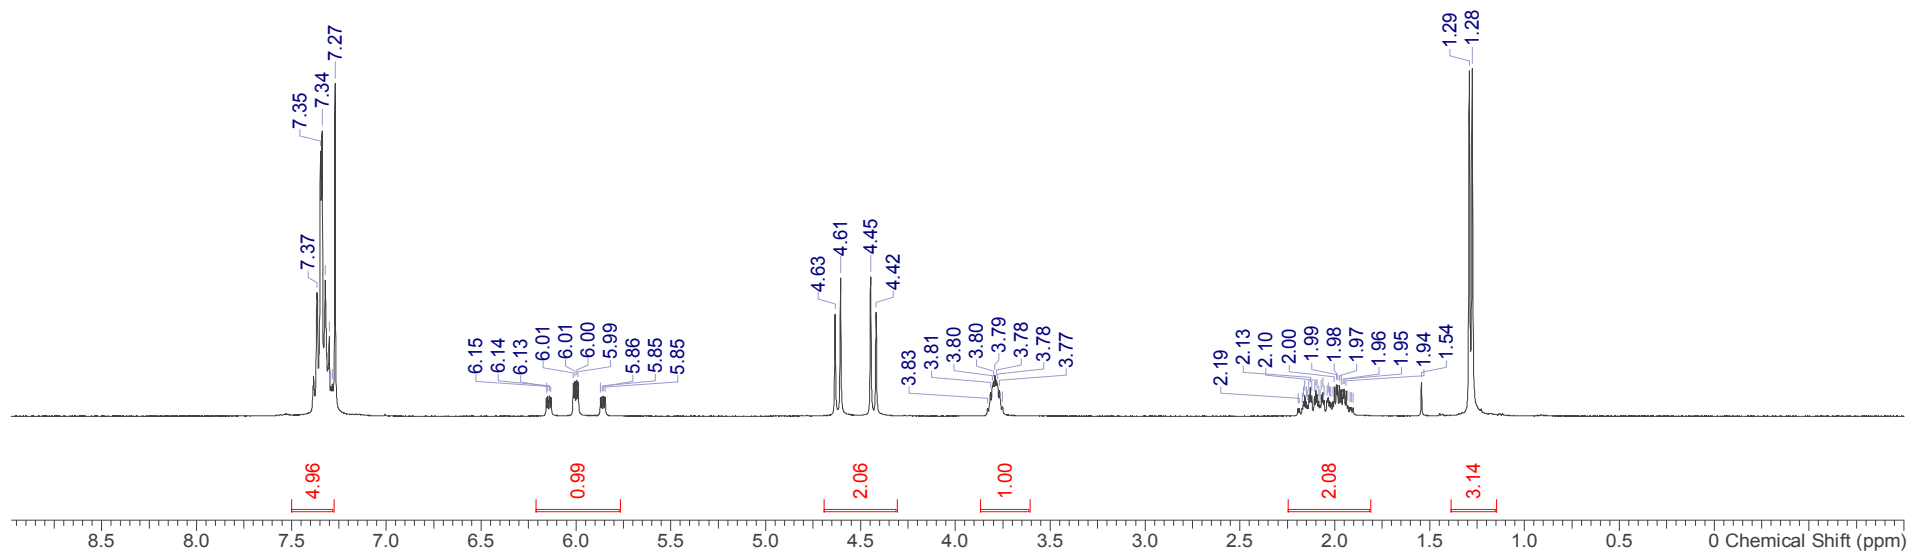

$^{13}\text{C}$  NMR,  $\text{CDCl}_3$ , 101 MHz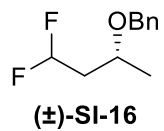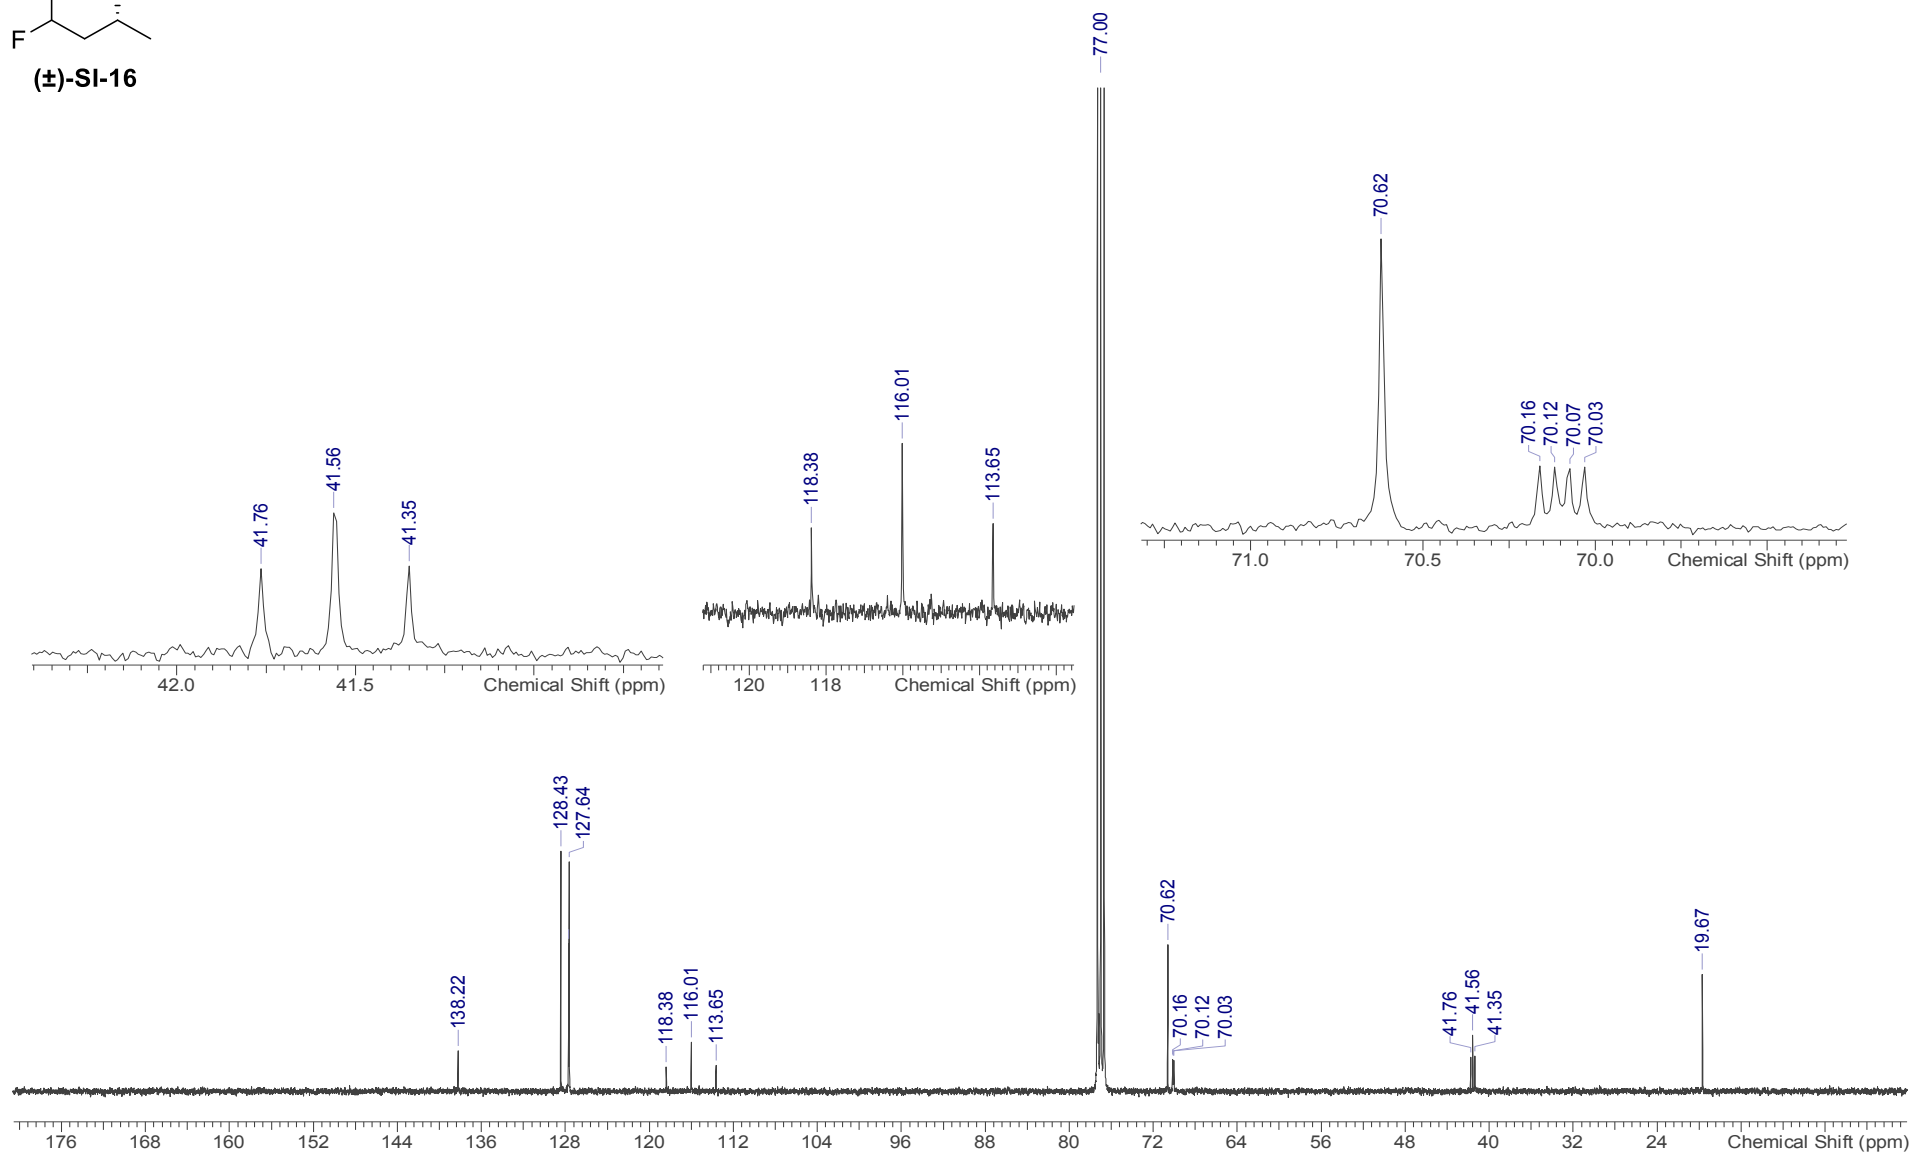



$^{19}\text{F}\{^1\text{H}\}$ ,  $\text{CDCl}_3$ , 376 MHz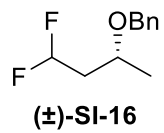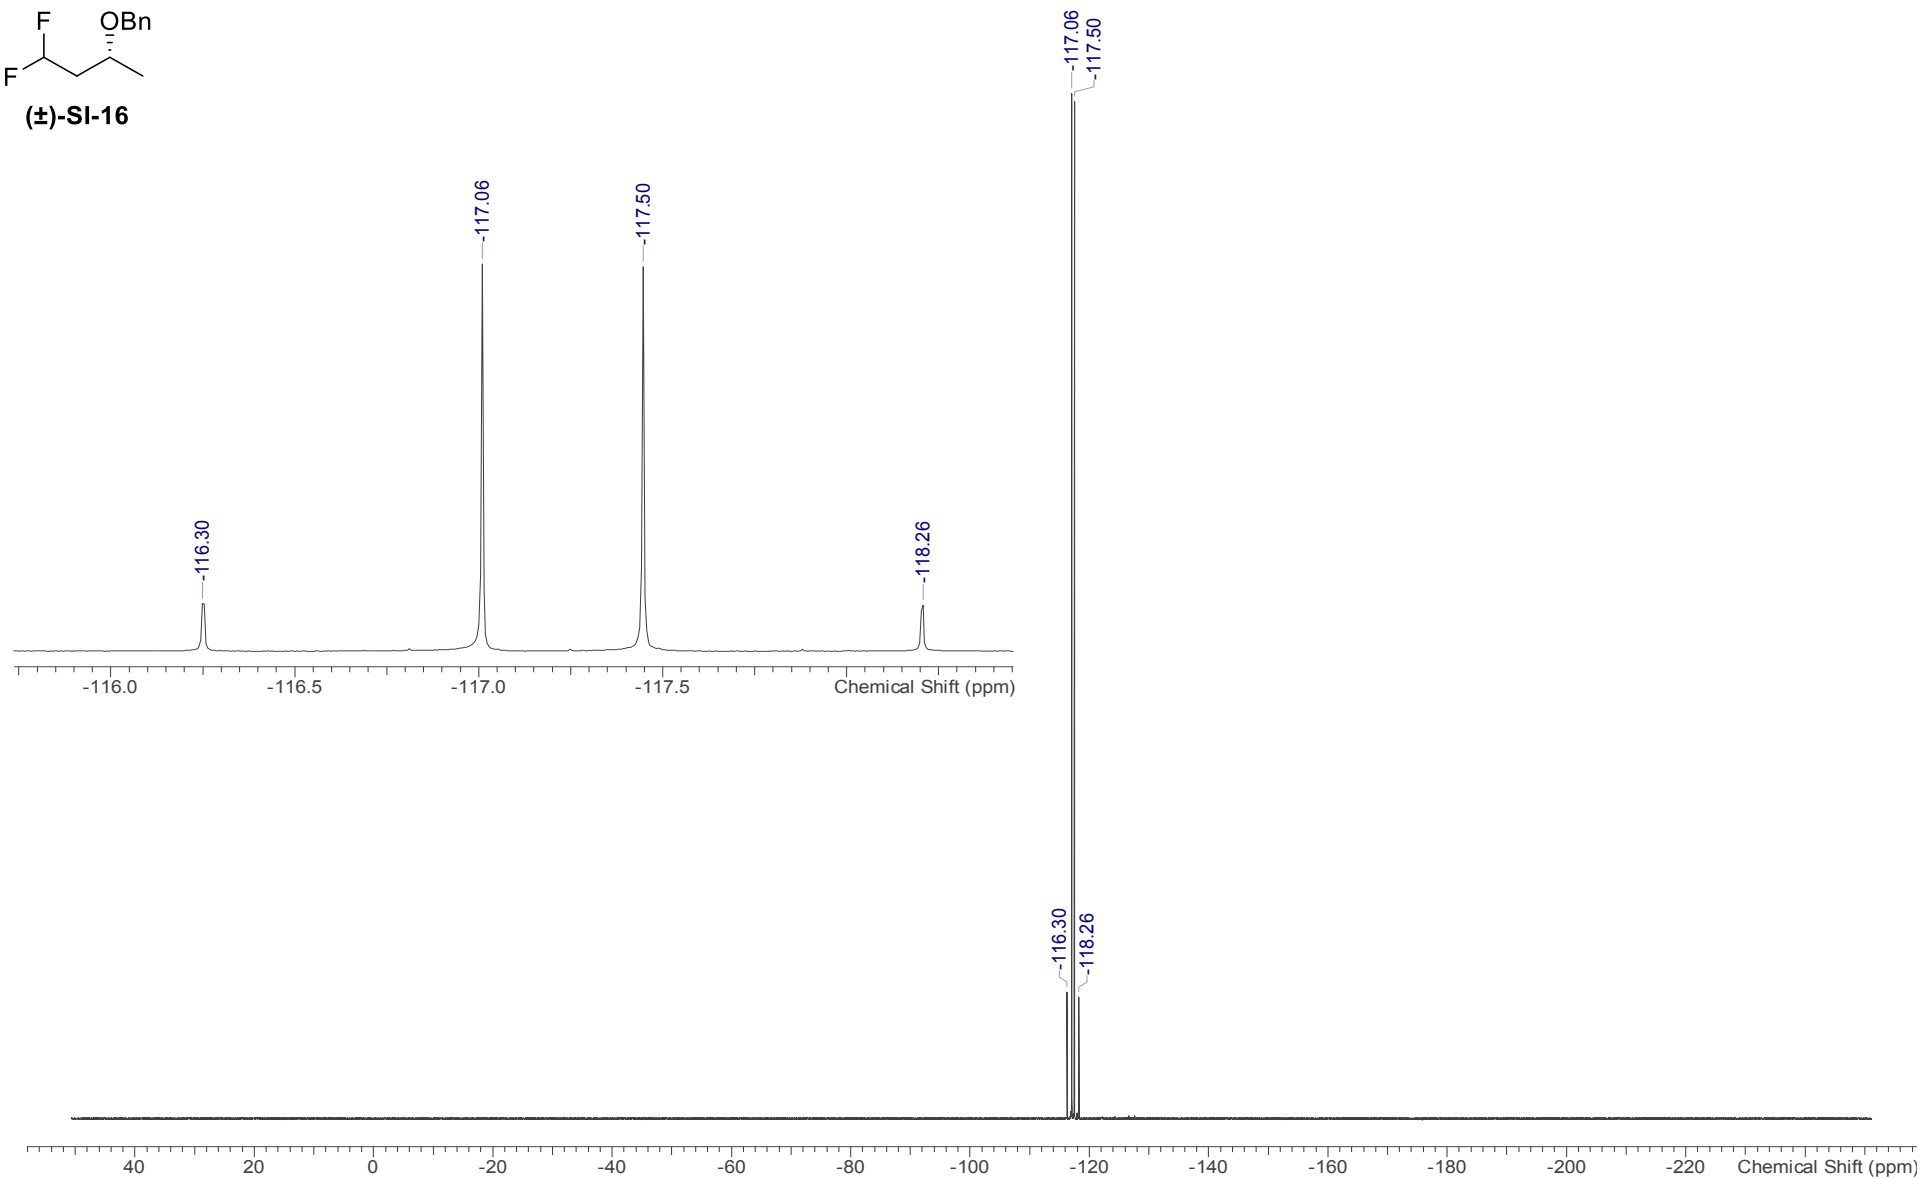

$^{19}\text{F}$ ,  $\text{CDCl}_3$ , 376 MHz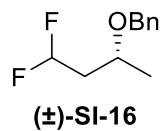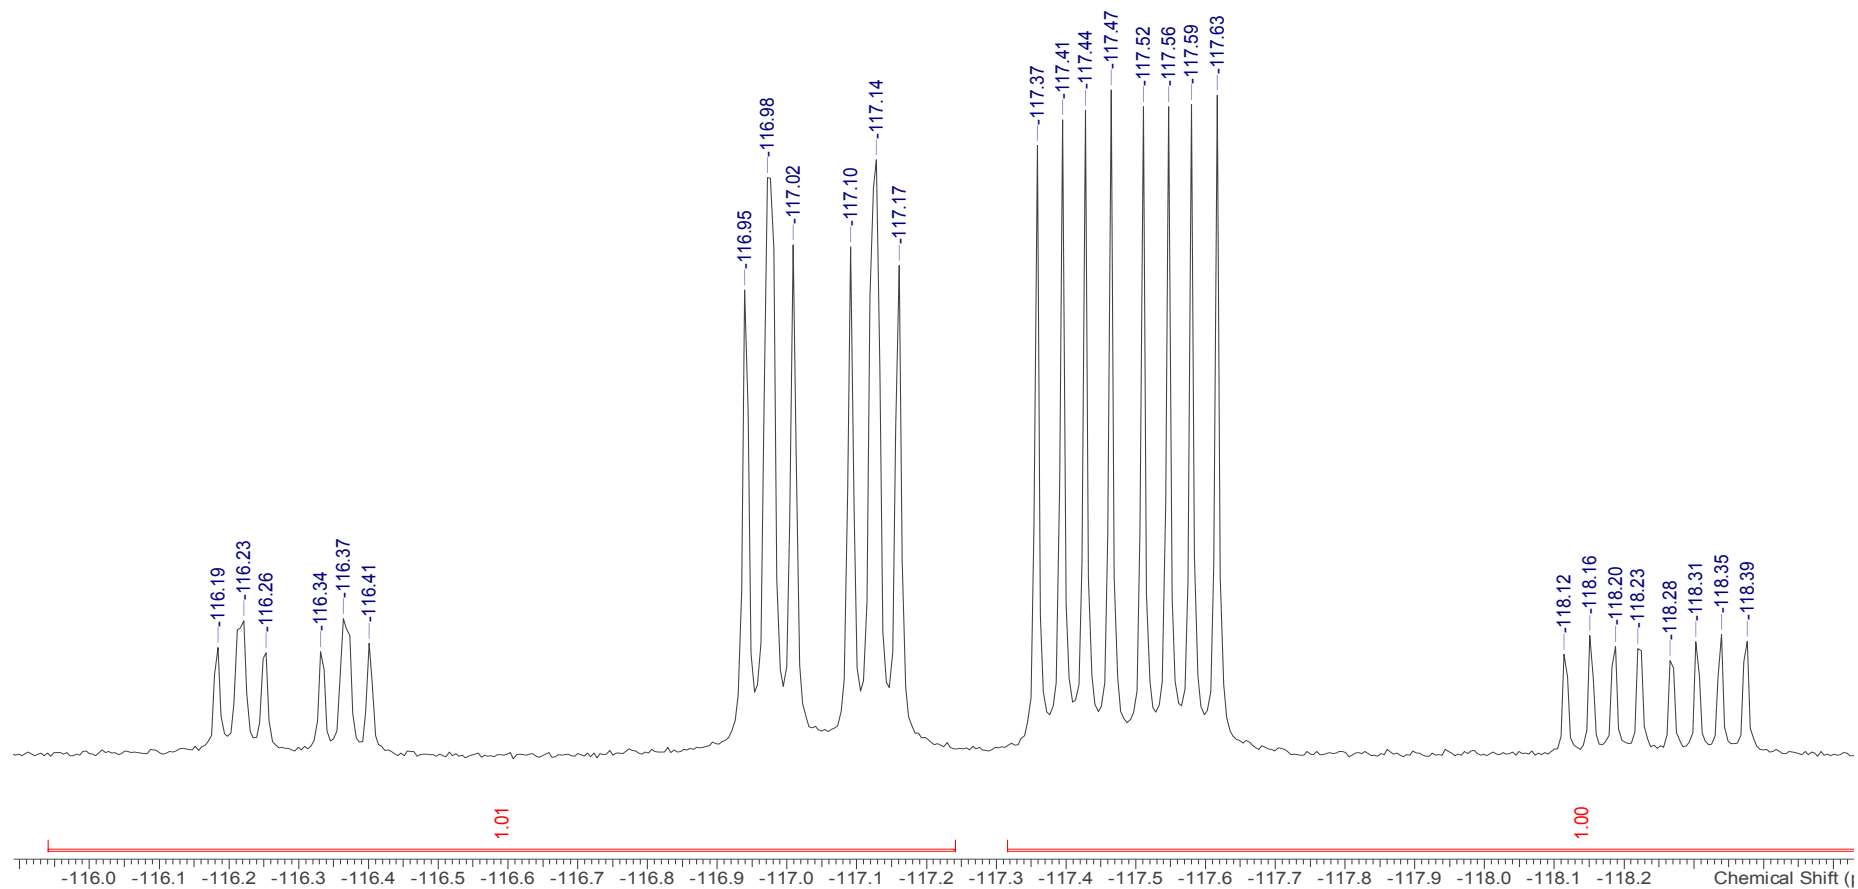

## 7.5.3 (±)-4,4-Difluorobutan-2-ol (±)-F

 $^{13}\text{C}$  NMR,  $\text{CDCl}_3$ , 101 MHz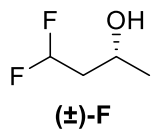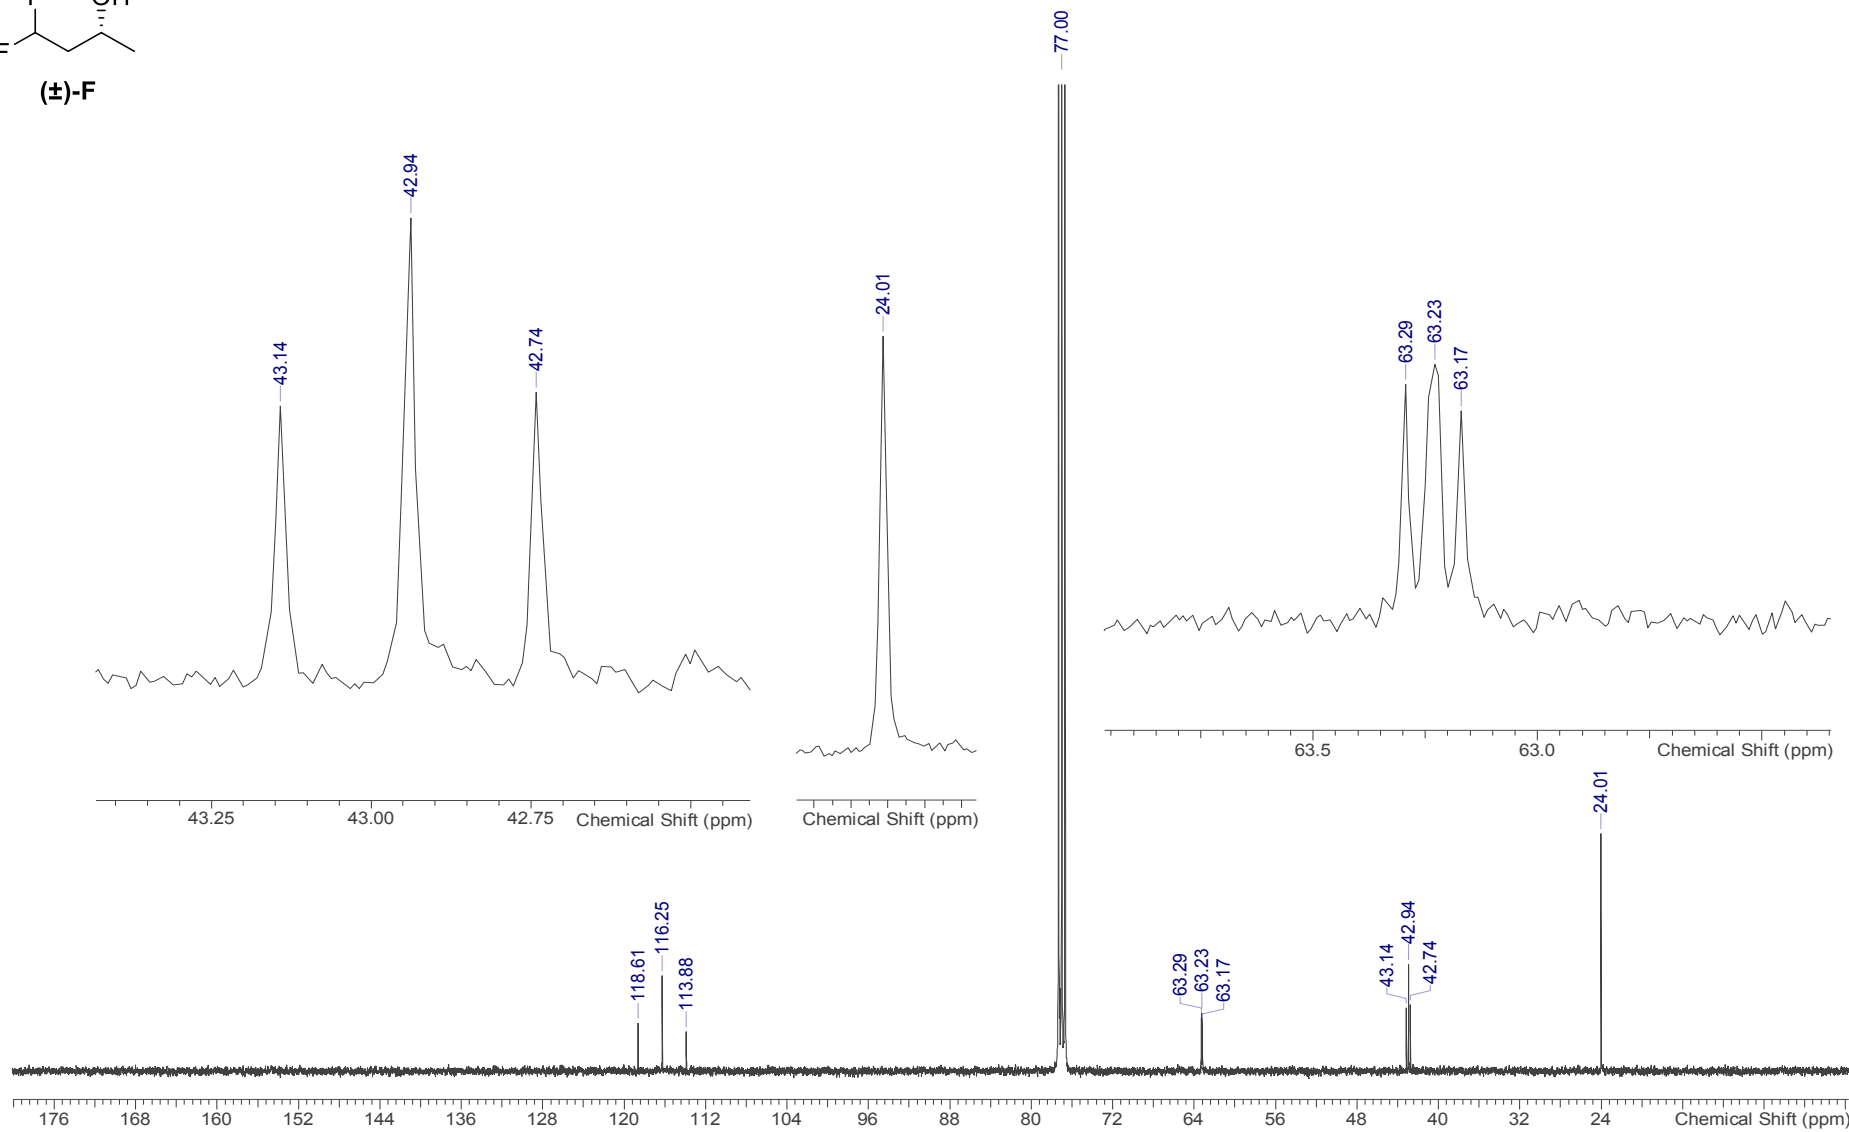

## 7.6 Synthesis of 3,3-difluoropropan-1-ol G

## 7.6.1 1-Benzyloxy-3,3-difluoropropane SI-17

 $^1\text{H NMR}$ ,  $\text{CDCl}_3$ , 400 MHz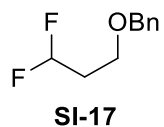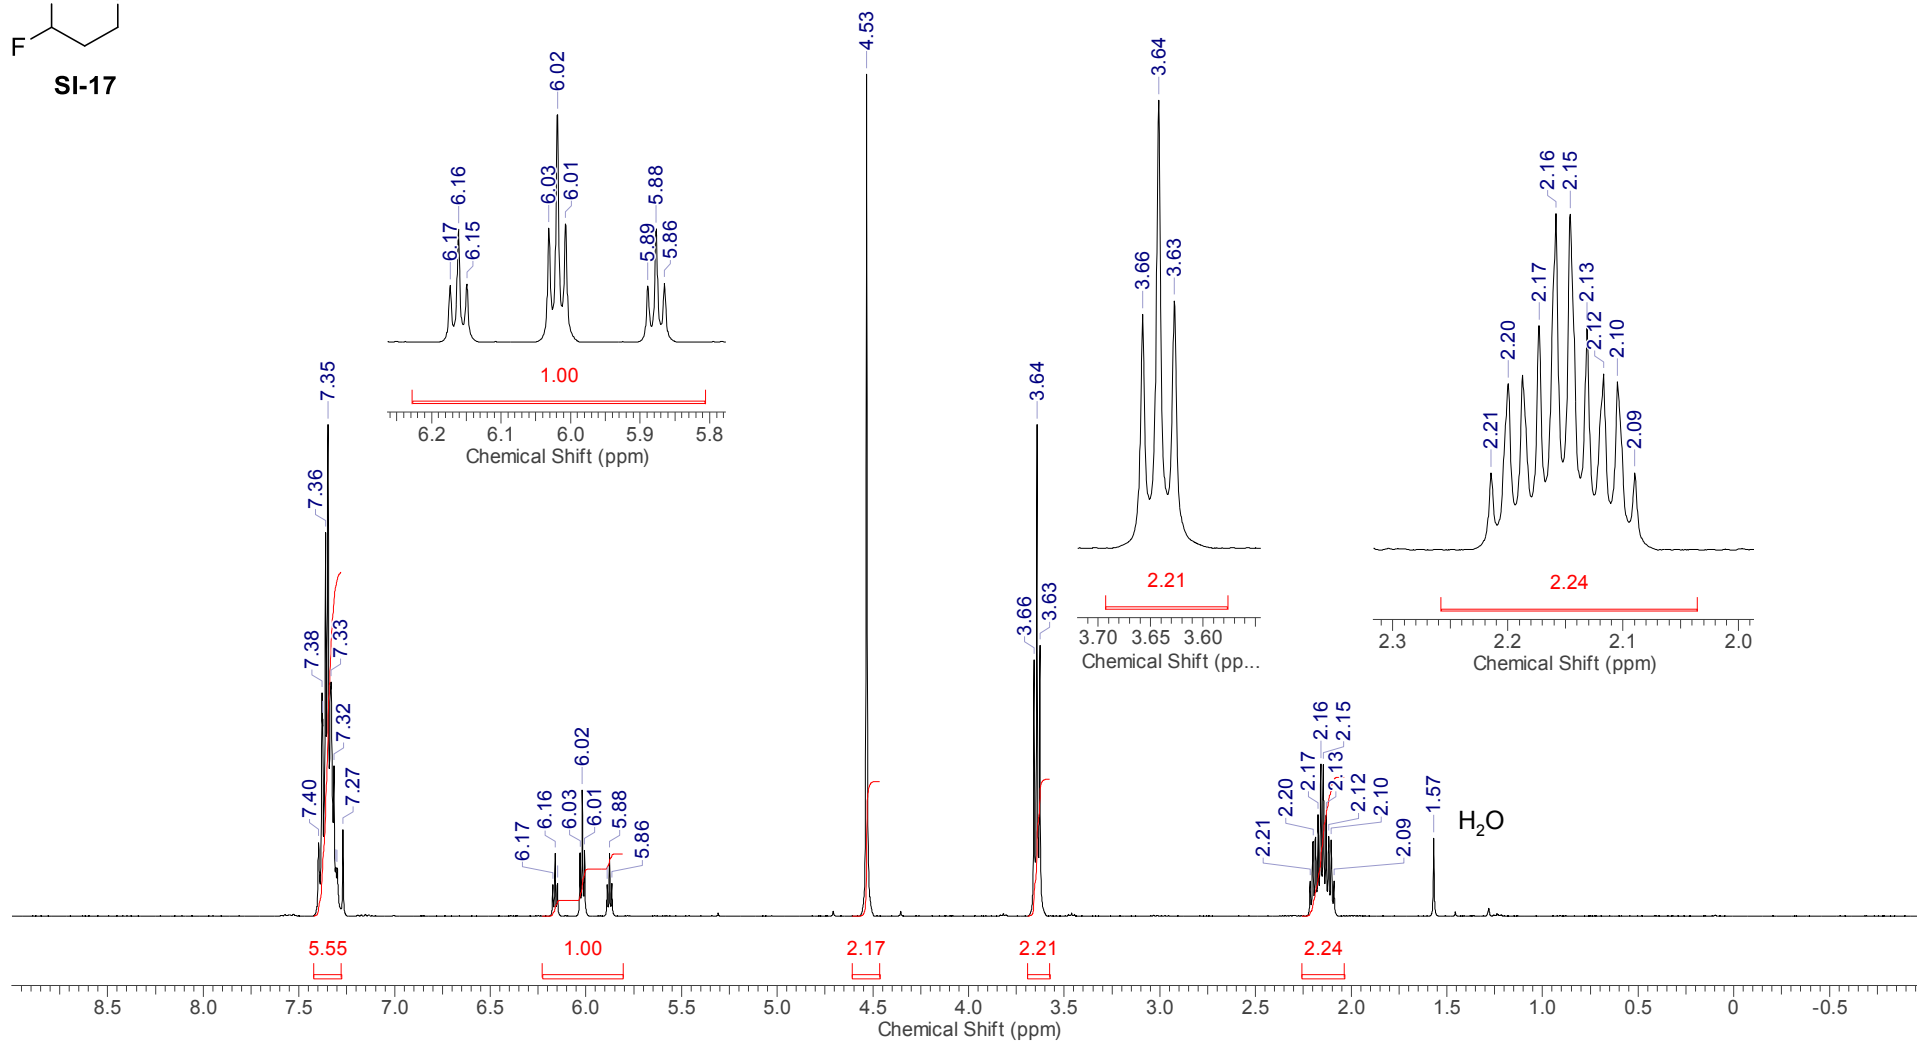

$^{13}\text{C}$  NMR,  $\text{CDCl}_3$ , 101 MHz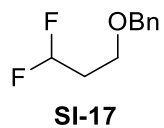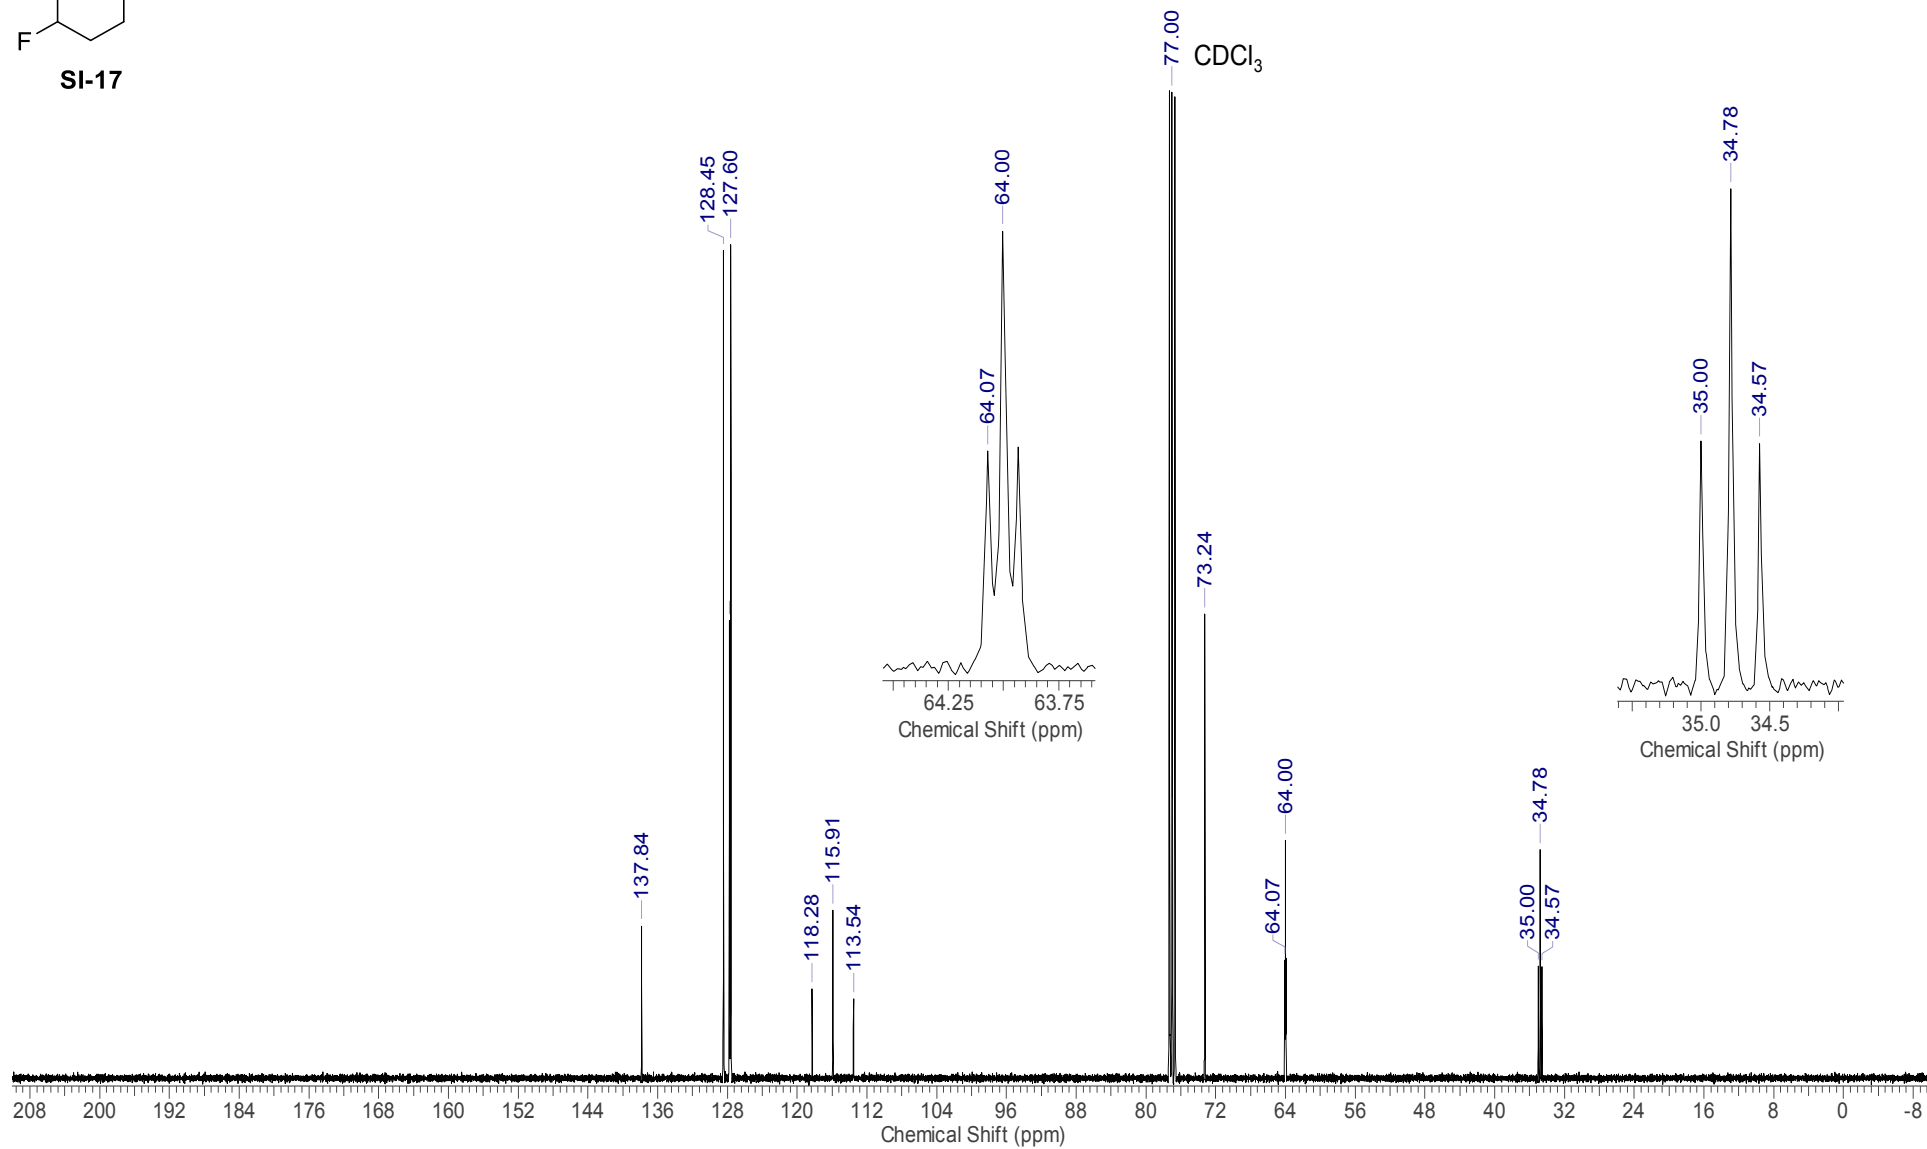

$^{19}\text{F}$ ,  $\text{CDCl}_3$ , 376 MHz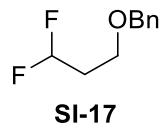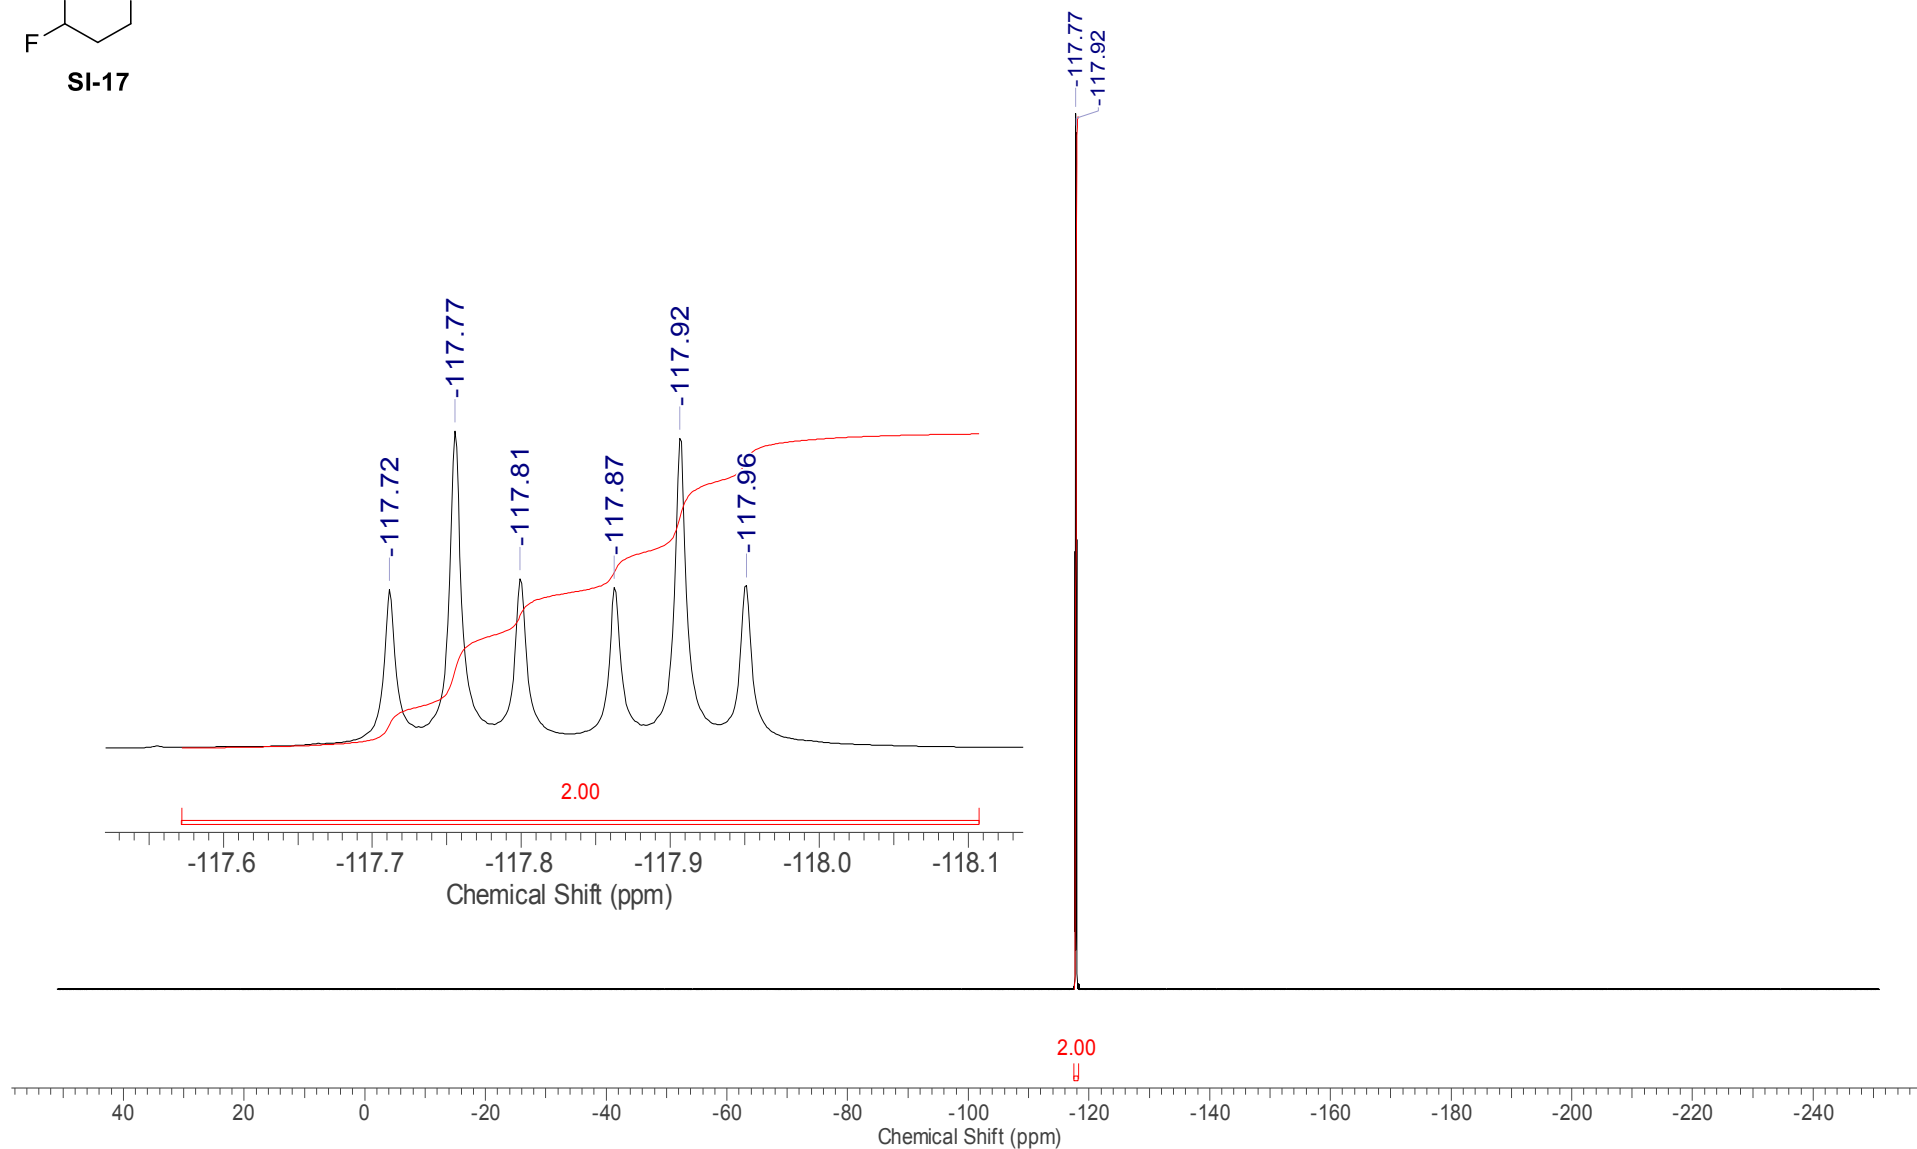

7.6.2 3,3-Difluoropropan-1-ol **G** $^{13}\text{C}$  NMR,  $\text{CDCl}_3$ , 126 MHz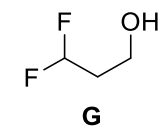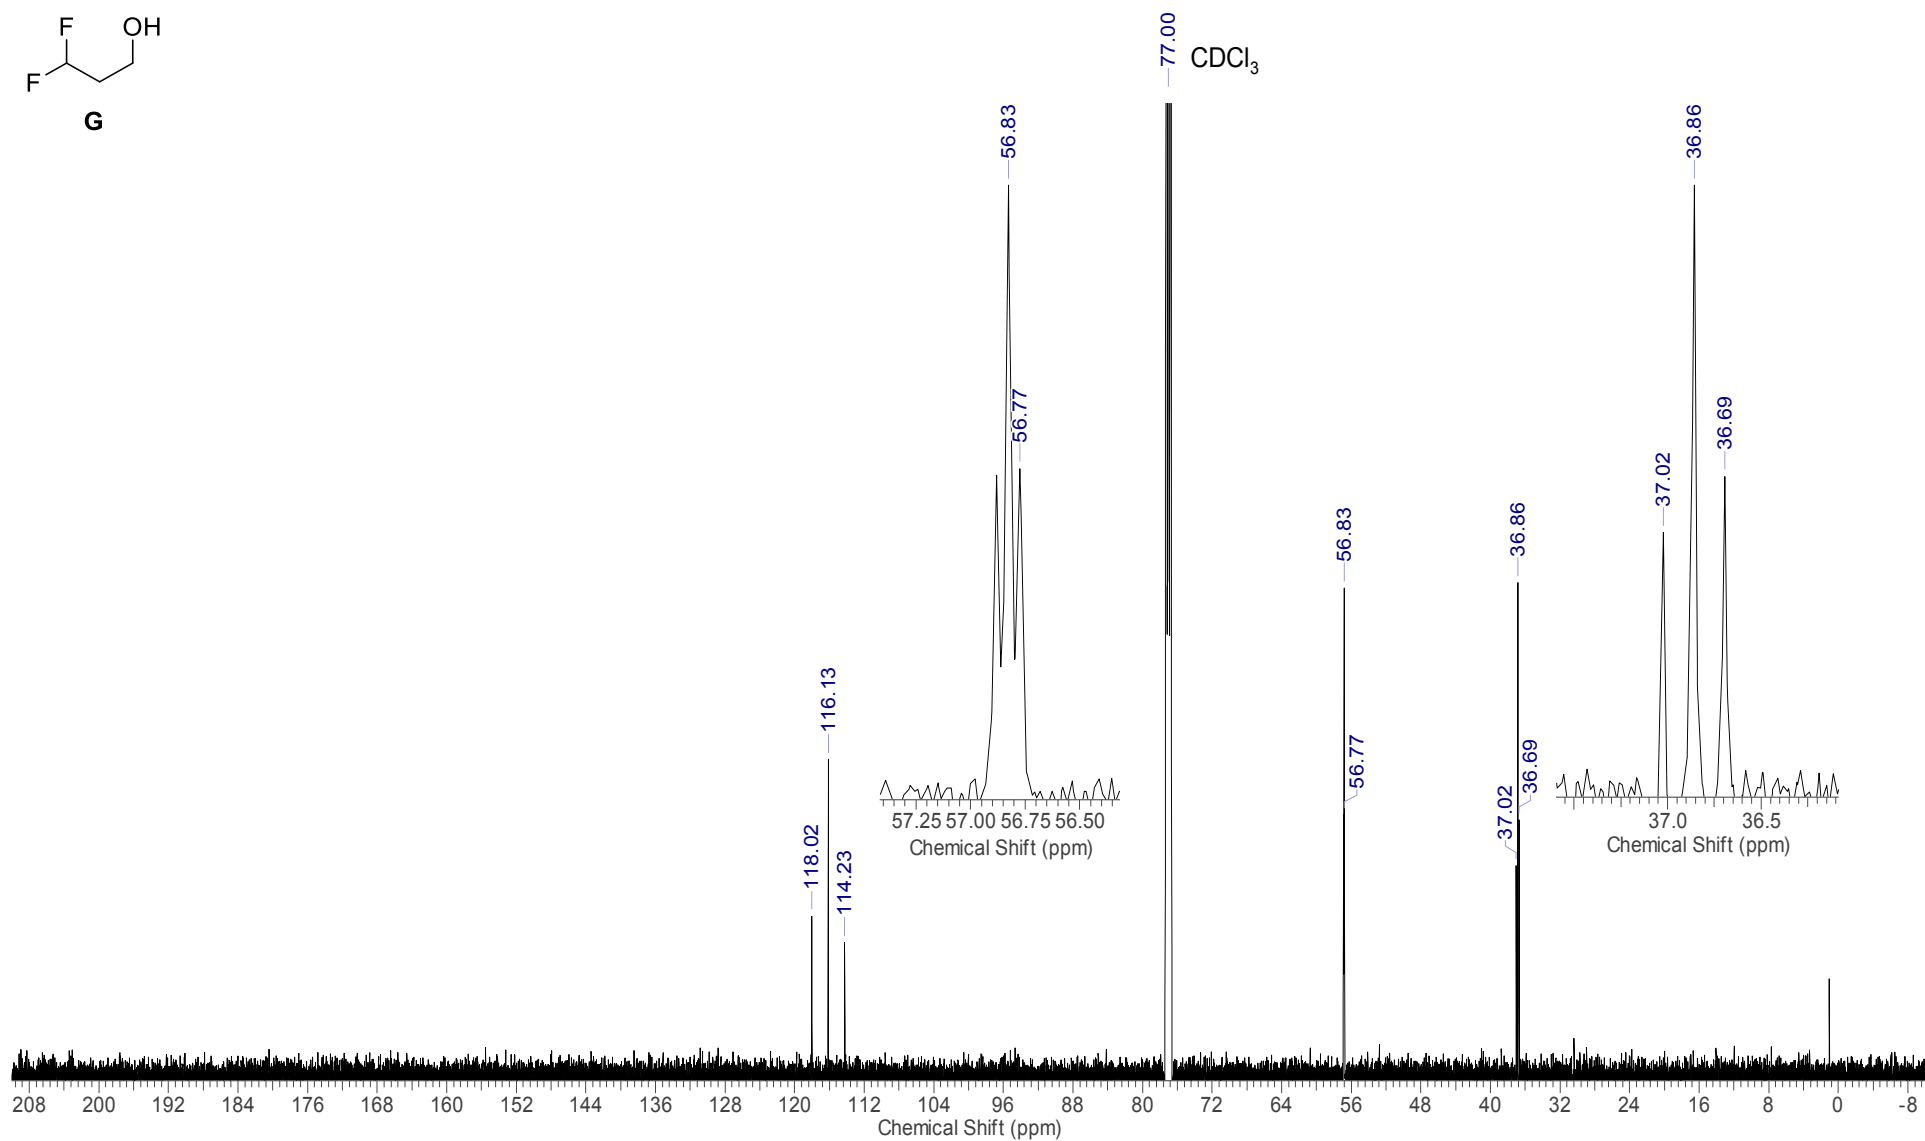

Supplement: chem0021-17808-sd1.pdf [file chem0021-17808-sd1.pdf]
